# Supplementary material for: Data Mining of Atherosclerotic Plaque Transcriptomes Predicts STAT1-Dependent Inflammatory Signal Integration in Vascular Disease
Source: Int J Mol Sci. 2014 Aug 18;15(8):14313–31. doi: 10.3390/ijms150814313 (PMC4159852; doi:10.3390/ijms150814313)
Supplement: Supplementary File 1 [file ijms-15-14313-s001.xlsx]

## Sheet: coronary_2up
Table S1. Genes upregulated in coronary plaques. Presence of regulatory elements marked with a +.
symbol	logFC	GAS	ISRE	NFkB	STAT_NFkB	STAT_IRF	STAT1 targets ifn/lps	IFNg-STAT1 tgts	LPS-STAT1 tgts
CARTPT	4.36664
HAPLN1	4.30919					+
SCG2	4.16001					+
CYTL1	4.14006					+
SLC10A4	3.8175				+
ATRNL1	3.6978			+	+	+
SLC14A1	3.64564					+
MAB21L2	3.645			+	+	+
SPP1	3.40718				+	+
DSC3	3.20021		+
GRIA1	3.0511				+	+
LNX1	2.9409			+	+	+
IL13RA2	2.93676					+
CP	2.92093				+	+
ARPP-21	2.85371		+
TNFRSF11B	2.77511					+
COL4A3	2.75692				+	+
CDH2	2.64782				+	+
GCNT2	2.63863		+		+	+
LGR5	2.58592				+
SLC26A4	2.54758				+	+
MAB21L1	2.46831
MYOZ2	2.41718
CTSD	2.38308
C5orf46	2.34565
FAM19A5	2.33816				+
RGS1	2.27284					+
SLC7A11	2.23054					+
CNTN1	2.17932	+				+
GRIA2	2.16058	+		+	+	+
MEGF10	2.15331			+	+	+
PDE8B	2.13152		+		+	+
CD55	2.12443					+
PCDH10	2.11871			+	+	+
SLC16A3	2.09641	+
IL6	2.09241						+		+
SPINT2	2.06498	+				+
ROBO2	2.05903	+		+		+
FOSB	2.05191		+	+	+	+
COL4A4	2.00266			+		+
NBLA00301	1.99053					+
PTPRZ1	1.9856	+		+	+	+
SHISA3	1.98515
TMEM178	1.95905				+	+
KIAA0774	1.95867	+
SOCS3	1.95698	+
FAM19A2	1.94069					+
DNER	1.91408				+	+
RPRML	1.88261			+
NELL2	1.84177					+
CLEC18A	1.84038
RBM20	1.83596					+
THBS1	1.80993				+	+
NSUN7	1.79764				+	+
CCL18	1.78626				+
SERPINE1	1.78556
VCAN	1.75698		+	+	+	+
PTN	1.75067
CA12	1.7484					+
F2R	1.74632
UNC5B	1.7326		+		+
C4orf49	1.70503
DIAPH3	1.69274				+	+
IGL@	1.68939
ARL4C	1.67311
ATP1B1	1.6631					+
CXCR4	1.66294				+
PDE10A	1.65904				+	+
SFRP1	1.65163
STC1	1.64298
KRT17	1.64009
SCG5	1.63054				+	+
ANXA3	1.61642				+
GALNT3	1.60804	+	+	+		+
ANKRD37	1.6012				+	+
MIR155HG	1.59983				+	+
TMEM200A	1.59103				+	+
VCAM1	1.58565			+	+	+
CDCA7L	1.56838					+
BDNF	1.56225		+	+		+
SELE	1.55427				+	+			+
CCL5	1.55341		+	+			+	+	+
PHLDA2	1.54785
CCL2	1.52796	+				+	+	+	+
MEG3	1.52548					+
DKK3	1.52454					+
SCGB3A2	1.51985
COLEC11	1.51724		+		+
CHN2	1.51414				+	+
CXCL9	1.5076		+	+			+	+	+
IGKC	1.50404
HMCN1	1.50395				+	+
CECR1	1.50205		+
GLRB	1.49048				+	+
LOC650392	1.48595
IGFBP2	1.48528				+	+
SLAMF8	1.48163					+	+	+
IGJ	1.47846	+		+	+	+
STK32B	1.46538			+
OCIAD2	1.45706					+
KRT7	1.45553				+	+
ITGA10	1.44213		+		+	+
PDGFD	1.4421	+	+	+		+
KRT18	1.42688
CPNE4	1.42298					+
APOE	1.42187
SPINK1	1.42111					+
ITGA11	1.42052					+
ST8SIA1	1.41959					+
FCGR1B	1.41883
RGS16	1.41133				+
LPCAT2	1.39254					+
CHSY3	1.38115
SOX8	1.37796
GAS6	1.36323				+
MLLT11	1.35481
TMEM130	1.35096				+
PHLDA1	1.35079			+	+
GZMK	1.34521			+		+
KCNK6	1.34465		+		+	+
MCOLN3	1.34456				+	+
CCDC146	1.34397				+	+
PROM1	1.34382
WDR19	1.3417				+	+
CXCL2	1.34016
HS3ST1	1.33658				+	+
OXTR	1.3322				+	+
CDH11	1.33113				+	+
COL10A1	1.31397	+				+
SEMA4A	1.3089		+	+	+	+
ALCAM	1.30638				+
CDC14B	1.30334	+		+	+	+
RGNEF	1.30298			+	+	+
SLC2A3	1.30239					+
CST6	1.28916
VDR	1.28003		+	+	+
COL21A1	1.27917				+	+
DUSP6	1.27373				+
GZMA	1.27307		+
PENK	1.26816				+
PURG	1.26767
SPATA18	1.26689			+	+	+
ARMC9	1.26676			+	+	+
CD28	1.26596	+
RHOJ	1.2646	+			+	+
LAMB1	1.26337		+		+	+
TPH1	1.26115				+
GSG1L	1.26033			+
SMPX	1.26024				+	+
ANGPTL7	1.25757
EGR1	1.2524	+
MMP9	1.24962			+	+
EPHA4	1.24839			+	+	+
FRMD4B	1.24619				+	+
MCF2	1.24403		+			+
FN1	1.24154			+	+	+
CNTN3	1.23894					+
ABCC3	1.23726		+		+	+
CD69	1.23678	+	+	+			+
ARHGAP18	1.23291
KRT8	1.23274
EHD3	1.22911	+	+		+
HPSE	1.22091		+
ARHGDIB	1.21758				+	+
C8orf4	1.21565
FLJ25076	1.21413
CTHRC1	1.20877			+		+
RIPK4	1.2078
CDO1	1.19636
DOK5	1.19597					+
MCOLN2	1.19472				+	+
ADSSL1	1.19352				+	+
MMP19	1.19284		+			+
GAP43	1.18881				+	+
GPM6B	1.18654	+			+	+
RIMS1	1.18564				+	+
SGK1	1.1824				+	+
HTR2B	1.17633					+
DOK7	1.17086
NOX4	1.17047					+
AKR1C3	1.16934
SLC12A6	1.16895			+	+	+
ASAM	1.1652
PREX1	1.15711	+
GALNT5	1.15618				+	+
APOC1	1.15562	+		+
FAM7A3	1.15554
PTX3	1.15341		+	+		+		+
NP	1.15066
KIAA1199	1.14372		+		+	+
VEGFA	1.13968				+	+
C19orf33	1.13954	+
CXCL10	1.13156		+	+	+		+	+	+
SOST	1.13077			+
PGBD3	1.13014				+	+
SNX25	1.12255					+
GLT8D4	1.12183
KIAA0101	1.11919
NAV1	1.11837				+	+
DNM3	1.11621					+
F2RL2	1.11572
CCRL1	1.11548		+			+
IL7R	1.11475				+	+
CCL19	1.11213	+	+	+	+	+
RUNX1	1.11146		+		+	+
CCL4	1.11101				+	+
TMEM49	1.10439
TNFRSF25	1.10226				+
TM4SF1	1.10117				+
NAMPT	1.10115				+	+
LIMS3	1.09737					+
THBS2	1.093				+	+
FRZB	1.08813				+	+
TSPAN5	1.08478				+	+
SLC24A4	1.07886	+			+	+
LOC254057	1.077
ANK3	1.07663		+		+	+
LOC284454	1.07656
LOC146336	1.07332
IBSP	1.07253						+		+
ADAMTS9	1.06985				+	+
HGF	1.06446					+
TLR4	1.06237		+			+
VIM	1.06213
TFAP2A	1.05944				+	+
SHOX2	1.05815
CDC42EP5	1.05742
ITGBL1	1.05651				+	+
FRAS1	1.05247					+
C8orf34	1.0487			+		+
IGSF6	1.04854					+
GPR37	1.04798
KIAA1211	1.04141				+
VEGFC	1.04065	+						+
ST6GALNAC5	1.03905		+			+
LOC346887	1.039
PABPC1L	1.0367				+	+
FXYD5	1.03572
TNS3	1.0328	+	+		+	+
CYSLTR1	1.03139					+
PTGS1	1.02956		+		+	+
C10orf11	1.02734	+	+		+	+
KCNT2	1.0265	+		+		+
CTSZ	1.02311				+
B3GNT7	1.02264				+	+
NCAM1	1.01858				+	+
STAC	1.01851			+	+	+
CDKN1A	1.01813	+	+	+	+	+
SNED1	1.01585					+
UCHL1	1.01246					+
C7orf10	1.01185				+
TNFRSF10B	1.00229		+		+	+
MECOM	1.00171					+
SLC6A6	1.00097

## Sheet: GO_coronary
Table S2. Gene ontology terms enriched in the coronary plaques.
GOID	Ontology	Term	Level	symbols	p
GO:2000026	biological_process	regulation of multicellular organismal development	4	CARTPT // SPP1 // TNFRSF11B // COL4A3 // CNTN1 // CNTN1 // CNTN1 // CNTN1 // CNTN1 // MEGF10 // IL6 // IL6 // IL6 // ROBO2 // THBS1 // THBS1 // SERPINE1 // CXCR4 // SFRP1 // KRT17 // KRT17 // ANXA3 // BDNF // CCL2 // MEG3 // APOE // APOE // APOE // SOX8 // GAS6 // PROM1 // OXTR // OXTR // OXTR // SEMA4A // SEMA4A // SEMA4A // SEMA4A // VDR // VDR // VDR // VDR // VDR // DUSP6 // DUSP6 // CD28 // …	7.88793e-14
GO:0048731	biological_process	system development	4	SCG2 // SCG2 // SCG2 // CYTL1 // MAB21L2 // SPP1 // TNFRSF11B // COL4A3 // CDH2 // CDH2 // CDH2 // LGR5 // MAB21L1 // SLC7A11 // CNTN1 // CNTN1 // CNTN1 // CNTN1 // CNTN1 // MEGF10 // IL6 // IL6 // IL6 // ROBO2 // COL4A4 // PTPRZ1 // SOCS3 // DNER // RBM20 // THBS1 // THBS1 // SERPINE1 // VCAN // PTN // F2R // UNC5B // CXCR4 // SFRP1 // STC1 // STC1 // KRT17 // KRT17 // VCAM1 // BDNF // PHLDA2 //…	6.50265e-13
GO:0009605	biological_process	response to external stimulus	2	CARTPT // SCG2 // SPP1 // TNFRSF11B // COL4A3 // CTSD // CTSD // CTSD // CNTN1 // IL6 // IL6 // IL6 // ROBO2 // COL4A4 // CCL18 // UNC5B // CXCR4 // SFRP1 // STC1 // STC1 // VCAM1 // BDNF // CCL5 // CCL2 // MEG3 // CXCL9 // GLRB // IGFBP2 // IGFBP2 // APOE // GAS6 // CXCL2 // SEMA4A // ALCAM // ALCAM // VDR // LAMB1 // EGR1 // EPHA4 // EPHA4 // EPHA4 // EPHA4 // EPHA4 // GAP43 // AKR1C3 // VEGFA …	7.23436e-13
GO:0022603	biological_process	regulation of anatomical structure morphogenesis	4	SPP1 // TNFRSF11B // COL4A3 // IL6 // IL6 // IL6 // ROBO2 // THBS1 // THBS1 // SERPINE1 // SFRP1 // ANXA3 // BDNF // CCL2 // MEG3 // APOE // APOE // APOE // SOX8 // SEMA4A // SEMA4A // SEMA4A // SEMA4A // VDR // VDR // VDR // VDR // DUSP6 // RHOJ // EPHA4 // EPHA4 // EPHA4 // EPHA4 // EPHA4 // FN1 // CTHRC1 // CTHRC1 // VEGFA // VEGFA // CXCL10 // RUNX1 // THBS2 // THBS2 // HGF // HGF // HGF // T…	1.58735e-12
GO:0007275	biological_process	multicellular organismal development	3	SCG2 // SCG2 // SCG2 // CYTL1 // MAB21L2 // SPP1 // DSC3 // TNFRSF11B // COL4A3 // CDH2 // CDH2 // CDH2 // GCNT2 // LGR5 // MAB21L1 // SLC7A11 // CNTN1 // CNTN1 // CNTN1 // CNTN1 // CNTN1 // MEGF10 // IL6 // IL6 // IL6 // ROBO2 // FOSB // COL4A4 // PTPRZ1 // SHISA3 // SOCS3 // DNER // RBM20 // THBS1 // THBS1 // SERPINE1 // VCAN // PTN // F2R // UNC5B // CXCR4 // SFRP1 // STC1 // STC1 // KRT17 // …	4.84228e-12
GO:0044707	biological_process	single-multicellular organism process	2	CARTPT // SCG2 // SCG2 // SCG2 // CYTL1 // MAB21L2 // SPP1 // SPP1 // DSC3 // GRIA1 // TNFRSF11B // COL4A3 // CDH2 // CDH2 // CDH2 // GCNT2 // LGR5 // SLC26A4 // MAB21L1 // CTSD // SLC7A11 // CNTN1 // CNTN1 // CNTN1 // CNTN1 // CNTN1 // GRIA2 // GRIA2 // GRIA2 // GRIA2 // GRIA2 // GRIA2 // GRIA2 // MEGF10 // SLC16A3 // IL6 // IL6 // IL6 // ROBO2 // FOSB // COL4A4 // PTPRZ1 // SHISA3 // SOCS3 // D…	5.34938e-12
GO:0007155	biological_process	cell adhesion	3	HAPLN1 // HAPLN1 // HAPLN1 // HAPLN1 // SPP1 // SPP1 // DSC3 // COL4A3 // CDH2 // CDH2 // CDH2 // CDH2 // CDH2 // SLC7A11 // CNTN1 // MEGF10 // PCDH10 // ROBO2 // ROBO2 // NELL2 // THBS1 // VCAN // VCAN // VCAN // VCAN // ATP1B1 // VCAM1 // VCAM1 // SELE // SELE // SELE // SELE // SELE // CCL5 // CCL2 // ITGA10 // ITGA10 // ITGA10 // ITGA11 // ITGA11 // GAS6 // CDH11 // CDH11 // CDH11 // ALCAM //…	5.34938e-12
GO:0022610	biological_process	biological adhesion	1	HAPLN1 // HAPLN1 // HAPLN1 // HAPLN1 // SPP1 // SPP1 // DSC3 // COL4A3 // CDH2 // CDH2 // CDH2 // CDH2 // CDH2 // SLC7A11 // CNTN1 // MEGF10 // PCDH10 // ROBO2 // ROBO2 // NELL2 // THBS1 // VCAN // VCAN // VCAN // VCAN // ATP1B1 // VCAM1 // VCAM1 // SELE // SELE // SELE // SELE // SELE // CCL5 // CCL2 // ITGA10 // ITGA10 // ITGA10 // ITGA11 // ITGA11 // GAS6 // CDH11 // CDH11 // CDH11 // ALCAM //…	5.34938e-12
GO:0040011	biological_process	locomotion	1	SCG2 // SPP1 // COL4A3 // CDH2 // CDH2 // CDH2 // SLC7A11 // CNTN1 // SLC16A3 // IL6 // ROBO2 // COL4A4 // DNER // THBS1 // CCL18 // VCAN // UNC5B // ATP1B1 // CXCR4 // VCAM1 // BDNF // SELE // CCL5 // CCL2 // MEG3 // CXCL9 // SOX8 // GAS6 // CXCL2 // SEMA4A // ALCAM // ALCAM // LAMB1 // LAMB1 // EPHA4 // EPHA4 // EPHA4 // EPHA4 // EPHA4 // FN1 // CTHRC1 // CTHRC1 // GAP43 // HTR2B // VEGFA // VE…	8.34035e-12
GO:0050793	biological_process	regulation of developmental process	3	CARTPT // SPP1 // TNFRSF11B // COL4A3 // CDH2 // CNTN1 // CNTN1 // CNTN1 // CNTN1 // CNTN1 // MEGF10 // IL6 // IL6 // IL6 // ROBO2 // SOCS3 // THBS1 // THBS1 // SERPINE1 // CXCR4 // SFRP1 // KRT17 // KRT17 // ANXA3 // BDNF // CCL2 // MEG3 // APOE // APOE // APOE // SOX8 // GAS6 // PROM1 // OXTR // OXTR // OXTR // SEMA4A // SEMA4A // SEMA4A // SEMA4A // VDR // VDR // VDR // VDR // VDR // DUSP6 // …	2.06204e-11
GO:0032501	biological_process	multicellular organismal process	1	CARTPT // SCG2 // SCG2 // SCG2 // CYTL1 // MAB21L2 // SPP1 // SPP1 // DSC3 // GRIA1 // TNFRSF11B // COL4A3 // CDH2 // CDH2 // CDH2 // GCNT2 // LGR5 // SLC26A4 // MAB21L1 // CTSD // SLC7A11 // CNTN1 // CNTN1 // CNTN1 // CNTN1 // CNTN1 // GRIA2 // GRIA2 // GRIA2 // GRIA2 // GRIA2 // GRIA2 // GRIA2 // MEGF10 // CD55 // SLC16A3 // IL6 // IL6 // IL6 // ROBO2 // FOSB // COL4A4 // PTPRZ1 // SHISA3 // SO…	2.6211e-11
GO:0009653	biological_process	anatomical structure morphogenesis	3	SCG2 // SCG2 // SCG2 // MAB21L2 // COL4A3 // CDH2 // CDH2 // CDH2 // MAB21L1 // CNTN1 // IL6 // IL6 // IL6 // ROBO2 // COL4A4 // PTPRZ1 // SOCS3 // THBS1 // THBS1 // SERPINE1 // F2R // UNC5B // CXCR4 // SFRP1 // KRT17 // KRT17 // VCAM1 // BDNF // PHLDA2 // CCL2 // MEG3 // DKK3 // KRT18 // APOE // APOE // APOE // SOX8 // GAS6 // PROM1 // WDR19 // WDR19 // WDR19 // SEMA4A // SEMA4A // SEMA4A // SEM…	2.6211e-11
GO:0044699	biological_process	single-organism process	1	CARTPT // HAPLN1 // HAPLN1 // HAPLN1 // HAPLN1 // SCG2 // SCG2 // SCG2 // CYTL1 // ATRNL1 // SLC14A1 // MAB21L2 // SPP1 // SPP1 // DSC3 // GRIA1 // IL13RA2 // CP // CP // CP // CP // CP // TNFRSF11B // COL4A3 // CDH2 // CDH2 // CDH2 // CDH2 // CDH2 // GCNT2 // LGR5 // SLC26A4 // SLC26A4 // SLC26A4 // MAB21L1 // CTSD // CTSD // CTSD // RGS1 // SLC7A11 // CNTN1 // CNTN1 // CNTN1 // CNTN1 // CNTN1 /…	9.20129e-11
GO:0006935	biological_process	chemotaxis	4	SCG2 // SPP1 // COL4A3 // CNTN1 // IL6 // ROBO2 // COL4A4 // CCL18 // UNC5B // CXCR4 // BDNF // CCL5 // CCL2 // MEG3 // CXCL9 // GAS6 // CXCL2 // SEMA4A // ALCAM // ALCAM // LAMB1 // EPHA4 // EPHA4 // EPHA4 // EPHA4 // EPHA4 // GAP43 // VEGFA // CXCL10 // CCRL1 // CCL19 // CCL4 // ANK3 // ANK3 // ANK3 // ANK3 // HGF // VEGFC // CYSLTR1 // NCAM1	1.30807e-10
GO:0042330	biological_process	taxis	3	SCG2 // SPP1 // COL4A3 // CNTN1 // IL6 // ROBO2 // COL4A4 // CCL18 // UNC5B // CXCR4 // BDNF // CCL5 // CCL2 // MEG3 // CXCL9 // GAS6 // CXCL2 // SEMA4A // ALCAM // ALCAM // LAMB1 // EPHA4 // EPHA4 // EPHA4 // EPHA4 // EPHA4 // GAP43 // VEGFA // CXCL10 // CCRL1 // CCL19 // CCL4 // ANK3 // ANK3 // ANK3 // ANK3 // HGF // VEGFC // CYSLTR1 // NCAM1	1.30807e-10
GO:0051094	biological_process	positive regulation of developmental process	4	CDH2 // IL6 // IL6 // IL6 // ROBO2 // SOCS3 // THBS1 // SERPINE1 // CXCR4 // SFRP1 // KRT17 // KRT17 // ANXA3 // BDNF // MEG3 // APOE // APOE // APOE // SOX8 // GAS6 // PROM1 // OXTR // OXTR // OXTR // VDR // VDR // VDR // VDR // VDR // EPHA4 // EPHA4 // EPHA4 // EPHA4 // EPHA4 // HPSE // CTHRC1 // CTHRC1 // GPM6B // VEGFA // VEGFA // IL7R // IL7R // IL7R // CCL19 // RUNX1 // FRZB // ADAMTS9 // H…	5.41292e-10
GO:0051781	biological_process	positive regulation of cell division	5	PTN // PDGFD // HTR2B // VEGFA // VEGFA // VEGFA // VEGFA // VEGFA // VEGFA // VEGFA // VEGFA // VEGFA // VEGFA // VEGFA // VEGFC	5.41292e-10
GO:0032502	biological_process	developmental process	1	SCG2 // SCG2 // SCG2 // CYTL1 // MAB21L2 // SPP1 // DSC3 // TNFRSF11B // COL4A3 // CDH2 // CDH2 // CDH2 // GCNT2 // LGR5 // MAB21L1 // SLC7A11 // CNTN1 // CNTN1 // CNTN1 // CNTN1 // CNTN1 // MEGF10 // IL6 // IL6 // IL6 // ROBO2 // FOSB // COL4A4 // PTPRZ1 // SHISA3 // SOCS3 // DNER // RBM20 // THBS1 // THBS1 // SERPINE1 // VCAN // PTN // F2R // UNC5B // CXCR4 // SFRP1 // STC1 // STC1 // KRT17 // …	8.41095e-10
GO:0048856	biological_process	anatomical structure development	2	SCG2 // SCG2 // SCG2 // CYTL1 // MAB21L2 // SPP1 // DSC3 // TNFRSF11B // COL4A3 // CDH2 // CDH2 // CDH2 // LGR5 // MAB21L1 // SLC7A11 // CNTN1 // CNTN1 // CNTN1 // CNTN1 // CNTN1 // MEGF10 // IL6 // IL6 // IL6 // ROBO2 // COL4A4 // PTPRZ1 // SOCS3 // DNER // RBM20 // THBS1 // THBS1 // SERPINE1 // VCAN // PTN // F2R // UNC5B // CXCR4 // SFRP1 // STC1 // STC1 // KRT17 // KRT17 // VCAM1 // BDNF // P…	1.72019e-09
GO:0044767	biological_process	single-organism developmental process	2	SCG2 // SCG2 // SCG2 // CYTL1 // MAB21L2 // SPP1 // DSC3 // COL4A3 // CDH2 // CDH2 // CDH2 // LGR5 // MAB21L1 // SLC7A11 // CNTN1 // CNTN1 // CNTN1 // CNTN1 // CNTN1 // MEGF10 // IL6 // IL6 // IL6 // ROBO2 // COL4A4 // PTPRZ1 // SOCS3 // DNER // RBM20 // THBS1 // THBS1 // SERPINE1 // VCAN // F2R // UNC5B // CXCR4 // SFRP1 // STC1 // STC1 // KRT17 // KRT17 // VCAM1 // BDNF // PHLDA2 // CCL2 // MEG…	2.54082e-09
GO:0044763	biological_process	single-organism cellular process	2	CARTPT // HAPLN1 // HAPLN1 // HAPLN1 // HAPLN1 // SCG2 // CYTL1 // ATRNL1 // SLC14A1 // SPP1 // SPP1 // DSC3 // GRIA1 // IL13RA2 // CP // CP // CP // CP // CP // TNFRSF11B // COL4A3 // CDH2 // CDH2 // CDH2 // CDH2 // CDH2 // LGR5 // SLC26A4 // CTSD // CTSD // CTSD // RGS1 // SLC7A11 // CNTN1 // CNTN1 // CNTN1 // CNTN1 // CNTN1 // GRIA2 // GRIA2 // GRIA2 // GRIA2 // GRIA2 // GRIA2 // GRIA2 // MEGF…	3.94666e-09
GO:0050896	biological_process	response to stimulus	1	CARTPT // SCG2 // CYTL1 // ATRNL1 // SPP1 // GRIA1 // IL13RA2 // TNFRSF11B // COL4A3 // LGR5 // CTSD // CTSD // CTSD // RGS1 // SLC7A11 // CNTN1 // GRIA2 // CD55 // SLC16A3 // IL6 // IL6 // IL6 // IL6 // IL6 // IL6 // IL6 // ROBO2 // FOSB // FOSB // FOSB // FOSB // FOSB // COL4A4 // SOCS3 // DNER // THBS1 // THBS1 // CCL18 // SERPINE1 // PTN // F2R // UNC5B // ARL4C // ATP1B1 // ATP1B1 // CXCR4 /…	5.10511e-09
GO:0048522	biological_process	positive regulation of cellular process	4	CARTPT // SCG2 // CYTL1 // MAB21L2 // SPP1 // COL4A3 // CDH2 // CDH2 // CDH2 // MAB21L1 // CNTN1 // CNTN1 // CNTN1 // CNTN1 // CNTN1 // IL6 // IL6 // IL6 // ROBO2 // SOCS3 // RBM20 // THBS1 // THBS1 // SERPINE1 // PTN // F2R // CXCR4 // SFRP1 // KRT17 // KRT17 // ANXA3 // VCAM1 // CDCA7L // BDNF // SELE // CCL5 // CCL2 // MEG3 // IGFBP2 // PDGFD // APOE // APOE // APOE // ST8SIA1 // ST8SIA1 // SO…	5.52891e-09
GO:1901342	biological_process	regulation of vasculature development	5	COL4A3 // IL6 // THBS1 // THBS1 // SERPINE1 // SFRP1 // ANXA3 // CCL2 // MEG3 // SEMA4A // SEMA4A // SEMA4A // SEMA4A // EGR1 // VEGFA // VEGFA // CXCL10 // RUNX1 // THBS2 // THBS2 // VEGFC // CYSLTR1	5.52891e-09
GO:0048513	biological_process	organ development	5	CYTL1 // MAB21L2 // SPP1 // COL4A3 // LGR5 // MAB21L1 // SLC7A11 // CNTN1 // CNTN1 // CNTN1 // CNTN1 // CNTN1 // MEGF10 // IL6 // IL6 // IL6 // ROBO2 // COL4A4 // SOCS3 // DNER // RBM20 // THBS1 // THBS1 // VCAN // PTN // F2R // CXCR4 // SFRP1 // STC1 // STC1 // KRT17 // KRT17 // VCAM1 // BDNF // PHLDA2 // CCL2 // DKK3 // ITGA11 // SOX8 // GAS6 // MCOLN3 // PROM1 // WDR19 // WDR19 // WDR19 // OXT…	1.34225e-08
GO:0048585	biological_process	negative regulation of response to stimulus	4	CARTPT // SPP1 // CDH2 // CDH2 // CDH2 // RGS1 // CD55 // ROBO2 // SOCS3 // THBS1 // SERPINE1 // UNC5B // SFRP1 // CCL5 // CCL2 // MEG3 // DKK3 // DKK3 // DKK3 // DKK3 // DKK3 // APOE // APOE // APOE // RGS16 // GAS6 // DUSP6 // DUSP6 // EGR1 // EPHA4 // EPHA4 // EPHA4 // EPHA4 // EPHA4 // CTHRC1 // CTHRC1 // HTR2B // SOST // SNX25 // SNX25 // IL7R // IL7R // IL7R // FRZB // HGF // TLR4 // TFAP2A…	1.5876e-08
GO:0006954	biological_process	inflammatory response	4	SCG2 // SPP1 // IL6 // THBS1 // THBS1 // CCL18 // F2R // CXCR4 // VCAM1 // BDNF // SELE // CCL5 // CCL2 // CXCL9 // CXCL2 // FN1 // CDO1 // NOX4 // PTX3 // CXCL10 // CCL19 // CCL4 // TLR4 // CYSLTR1 // MECOM // MECOM // MECOM // MECOM // MECOM	3.73346e-08
GO:0051302	biological_process	regulation of cell division	4	PTN // PDGFD // HTR2B // VEGFA // VEGFA // VEGFA // VEGFA // VEGFA // VEGFA // VEGFA // VEGFA // VEGFA // VEGFA // VEGFA // VEGFC	3.73346e-08
GO:0001780	biological_process	neutrophil homeostasis	6	IL6 // IL6 // IL6 // MECOM // MECOM // MECOM // MECOM // MECOM	3.90391e-08
GO:0007399	biological_process	nervous system development	5	MAB21L2 // SPP1 // COL4A3 // SLC7A11 // CNTN1 // CNTN1 // CNTN1 // CNTN1 // CNTN1 // IL6 // IL6 // IL6 // ROBO2 // COL4A4 // PTPRZ1 // DNER // VCAN // PTN // UNC5B // CXCR4 // SFRP1 // BDNF // CCL2 // MEG3 // GLRB // APOE // APOE // APOE // SOX8 // GAS6 // MCOLN3 // PROM1 // WDR19 // WDR19 // WDR19 // OXTR // OXTR // OXTR // SEMA4A // SEMA4A // SEMA4A // SEMA4A // ALCAM // ALCAM // LAMB1 // LAMB1…	5.34564e-08
GO:0048666	biological_process	neuron development	9	COL4A3 // CNTN1 // CNTN1 // CNTN1 // CNTN1 // CNTN1 // IL6 // ROBO2 // COL4A4 // PTPRZ1 // UNC5B // CXCR4 // BDNF // MEG3 // APOE // APOE // APOE // SEMA4A // SEMA4A // SEMA4A // SEMA4A // ALCAM // ALCAM // LAMB1 // LAMB1 // EPHA4 // EPHA4 // EPHA4 // EPHA4 // EPHA4 // MCF2 // CTHRC1 // CTHRC1 // GAP43 // VEGFA // VEGFA // RUNX1 // FRZB // ANK3 // ANK3 // ANK3 // ANK3 // TFAP2A // NCAM1 // UCHL1 …	6.58046e-08
GO:0045765	biological_process	regulation of angiogenesis	6	COL4A3 // IL6 // THBS1 // THBS1 // SERPINE1 // SFRP1 // ANXA3 // CCL2 // MEG3 // SEMA4A // SEMA4A // SEMA4A // SEMA4A // VEGFA // VEGFA // CXCL10 // RUNX1 // THBS2 // THBS2 // CYSLTR1	6.59739e-08
GO:0048681	biological_process	negative regulation of axon regeneration	13	SPP1 // EPHA4 // EPHA4 // EPHA4 // EPHA4 // EPHA4	1.20498e-07
GO:0070571	biological_process	negative regulation of neuron projection regeneration	12	SPP1 // EPHA4 // EPHA4 // EPHA4 // EPHA4 // EPHA4	1.20498e-07
GO:0007154	biological_process	cell communication	3	CARTPT // SCG2 // CYTL1 // ATRNL1 // GRIA1 // IL13RA2 // TNFRSF11B // COL4A3 // LGR5 // CTSD // CTSD // CTSD // RGS1 // CNTN1 // GRIA2 // GRIA2 // GRIA2 // GRIA2 // GRIA2 // GRIA2 // GRIA2 // IL6 // IL6 // IL6 // ROBO2 // SOCS3 // DNER // CCL18 // SERPINE1 // PTN // F2R // UNC5B // ARL4C // CXCR4 // PDE10A // SFRP1 // STC1 // KRT17 // SCG5 // SCG5 // SCG5 // SCG5 // VCAM1 // BDNF // SELE // CCL5 …	1.25166e-07
GO:0051239	biological_process	regulation of multicellular organismal process	3	CARTPT // SPP1 // TNFRSF11B // COL4A3 // CNTN1 // CNTN1 // CNTN1 // CNTN1 // CNTN1 // MEGF10 // IL6 // IL6 // IL6 // ROBO2 // THBS1 // THBS1 // SERPINE1 // F2R // CXCR4 // SFRP1 // KRT17 // KRT17 // ANXA3 // BDNF // CCL2 // MEG3 // APOE // APOE // APOE // SOX8 // GAS6 // PROM1 // OXTR // OXTR // OXTR // SEMA4A // SEMA4A // SEMA4A // SEMA4A // VDR // VDR // VDR // VDR // VDR // DUSP6 // DUSP6 // C…	1.30363e-07
GO:0032101	biological_process	regulation of response to external stimulus	4	CARTPT // SCG2 // SPP1 // CD55 // IL6 // ROBO2 // THBS1 // SERPINE1 // F2R // CXCR4 // SELE // CCL5 // CCL2 // APOE // APOE // APOE // GAS6 // CD28 // EPHA4 // EPHA4 // EPHA4 // EPHA4 // EPHA4 // HPSE // VEGFA // CXCL10 // CCL19 // CCL4 // TLR4 // VEGFC	1.65276e-07
GO:0000902	biological_process	cell morphogenesis	5	COL4A3 // CNTN1 // ROBO2 // COL4A4 // PTPRZ1 // UNC5B // CXCR4 // SFRP1 // BDNF // MEG3 // APOE // APOE // APOE // WDR19 // WDR19 // WDR19 // SEMA4A // SEMA4A // SEMA4A // SEMA4A // ALCAM // ALCAM // VDR // LAMB1 // EPHA4 // EPHA4 // EPHA4 // EPHA4 // EPHA4 // FN1 // GAP43 // NOX4 // NOX4 // IL7R // IL7R // IL7R // FRZB // ANK3 // ANK3 // ANK3 // ANK3 // HGF // HGF // HGF // NCAM1 // UCHL1 // UCH…	2.58217e-07
GO:0002687	biological_process	positive regulation of leukocyte migration	8	IL6 // THBS1 // SERPINE1 // SELE // CCL5 // CCL2 // GAS6 // VEGFA // CXCL10 // CCL19 // CCL4 // VEGFC	2.58217e-07
GO:0048518	biological_process	positive regulation of biological process	3	CARTPT // SCG2 // CYTL1 // MAB21L2 // SPP1 // COL4A3 // CDH2 // CDH2 // CDH2 // MAB21L1 // CNTN1 // CNTN1 // CNTN1 // CNTN1 // CNTN1 // CD55 // IL6 // IL6 // IL6 // ROBO2 // SOCS3 // RBM20 // THBS1 // THBS1 // SERPINE1 // PTN // F2R // CXCR4 // SFRP1 // KRT17 // KRT17 // ANXA3 // VCAM1 // CDCA7L // BDNF // SELE // CCL5 // CCL2 // MEG3 // IGKC // IGFBP2 // PDGFD // APOE // APOE // APOE // ST8SIA1 …	2.62614e-07
GO:0002690	biological_process	positive regulation of leukocyte chemotaxis	9	IL6 // THBS1 // SERPINE1 // CCL5 // CCL2 // GAS6 // VEGFA // CXCL10 // CCL19 // CCL4 // VEGFC	2.80295e-07
GO:0016525	biological_process	negative regulation of angiogenesis	7	COL4A3 // THBS1 // THBS1 // SERPINE1 // CCL2 // MEG3 // SEMA4A // SEMA4A // SEMA4A // SEMA4A // CXCL10 // THBS2 // THBS2	2.81806e-07
GO:0050795	biological_process	regulation of behavior	4	SCG2 // IL6 // IL6 // IL6 // ROBO2 // THBS1 // SERPINE1 // CXCR4 // CCL5 // CCL2 // GAS6 // HTR2B // VEGFA // CXCL10 // CCL19 // CCL4 // VEGFC	3.06063e-07
GO:0030182	biological_process	neuron differentiation	8	COL4A3 // CNTN1 // CNTN1 // CNTN1 // CNTN1 // CNTN1 // IL6 // ROBO2 // COL4A4 // PTPRZ1 // UNC5B // CXCR4 // BDNF // MEG3 // APOE // APOE // APOE // SOX8 // MCOLN3 // PROM1 // SEMA4A // SEMA4A // SEMA4A // SEMA4A // ALCAM // ALCAM // LAMB1 // LAMB1 // EPHA4 // EPHA4 // EPHA4 // EPHA4 // EPHA4 // MCF2 // CTHRC1 // CTHRC1 // GAP43 // VEGFA // VEGFA // RUNX1 // FRZB // ANK3 // ANK3 // ANK3 // ANK3 /…	3.06063e-07
GO:0031175	biological_process	neuron projection development	10	COL4A3 // CNTN1 // CNTN1 // CNTN1 // CNTN1 // CNTN1 // IL6 // ROBO2 // COL4A4 // PTPRZ1 // UNC5B // CXCR4 // BDNF // MEG3 // APOE // APOE // APOE // SEMA4A // SEMA4A // SEMA4A // SEMA4A // ALCAM // ALCAM // LAMB1 // LAMB1 // EPHA4 // EPHA4 // EPHA4 // EPHA4 // EPHA4 // MCF2 // GAP43 // FRZB // ANK3 // ANK3 // ANK3 // ANK3 // NCAM1 // UCHL1 // UCHL1	4.11137e-07
GO:0016477	biological_process	cell migration	5	SCG2 // SPP1 // CDH2 // CDH2 // CDH2 // SLC7A11 // SLC16A3 // IL6 // DNER // THBS1 // VCAN // ATP1B1 // CXCR4 // VCAM1 // SELE // CCL5 // CCL2 // SOX8 // GAS6 // LAMB1 // LAMB1 // EPHA4 // EPHA4 // EPHA4 // EPHA4 // EPHA4 // FN1 // CTHRC1 // CTHRC1 // HTR2B // VEGFA // VEGFA // NAV1 // CCL19 // HGF // VEGFC // TNS3 // TNS3 // TNS3	4.27387e-07
GO:0007409	biological_process	axonogenesis	12	COL4A3 // CNTN1 // ROBO2 // COL4A4 // PTPRZ1 // UNC5B // CXCR4 // BDNF // MEG3 // APOE // APOE // APOE // SEMA4A // SEMA4A // SEMA4A // SEMA4A // ALCAM // ALCAM // LAMB1 // EPHA4 // EPHA4 // EPHA4 // EPHA4 // EPHA4 // GAP43 // FRZB // ANK3 // ANK3 // ANK3 // ANK3 // NCAM1 // UCHL1 // UCHL1	4.75e-07
GO:0051716	biological_process	cellular response to stimulus	3	CARTPT // SCG2 // CYTL1 // ATRNL1 // SPP1 // GRIA1 // IL13RA2 // TNFRSF11B // COL4A3 // LGR5 // CTSD // CTSD // CTSD // RGS1 // CNTN1 // GRIA2 // IL6 // IL6 // IL6 // ROBO2 // FOSB // FOSB // FOSB // FOSB // FOSB // SOCS3 // DNER // THBS1 // CCL18 // SERPINE1 // PTN // F2R // UNC5B // ARL4C // CXCR4 // PDE10A // SFRP1 // STC1 // STC1 // KRT17 // SCG5 // SCG5 // SCG5 // SCG5 // VCAM1 // SELE // CC…	7.7225e-07
GO:0009611	biological_process	response to wounding	3	SCG2 // SPP1 // SLC7A11 // SLC16A3 // IL6 // IL6 // IL6 // THBS1 // THBS1 // CCL18 // SERPINE1 // F2R // ATP1B1 // CXCR4 // PDE10A // VCAM1 // BDNF // SELE // CCL5 // CCL2 // CXCL9 // APOE // APOE // APOE // GAS6 // CXCL2 // FN1 // EHD3 // HPSE // CDO1 // GAP43 // NOX4 // PTX3 // VEGFA // CXCL10 // F2RL2 // CCL19 // CCL4 // HGF // TLR4 // VEGFC // CYSLTR1 // MECOM // MECOM // MECOM // MECOM // ME…	8.20911e-07
GO:0048699	biological_process	generation of neurons	7	SPP1 // COL4A3 // CNTN1 // CNTN1 // CNTN1 // CNTN1 // CNTN1 // IL6 // IL6 // IL6 // ROBO2 // COL4A4 // PTPRZ1 // DNER // UNC5B // CXCR4 // BDNF // MEG3 // APOE // APOE // APOE // SOX8 // GAS6 // MCOLN3 // PROM1 // SEMA4A // SEMA4A // SEMA4A // SEMA4A // ALCAM // ALCAM // LAMB1 // LAMB1 // EPHA4 // EPHA4 // EPHA4 // EPHA4 // EPHA4 // MCF2 // CTHRC1 // CTHRC1 // GAP43 // PREX1 // VEGFA // VEGFA // …	1.07986e-06
GO:0022008	biological_process	neurogenesis	6	SPP1 // COL4A3 // CNTN1 // CNTN1 // CNTN1 // CNTN1 // CNTN1 // IL6 // IL6 // IL6 // ROBO2 // COL4A4 // PTPRZ1 // DNER // VCAN // UNC5B // CXCR4 // BDNF // CCL2 // MEG3 // APOE // APOE // APOE // SOX8 // GAS6 // MCOLN3 // PROM1 // SEMA4A // SEMA4A // SEMA4A // SEMA4A // ALCAM // ALCAM // LAMB1 // LAMB1 // EGR1 // EPHA4 // EPHA4 // EPHA4 // EPHA4 // EPHA4 // MCF2 // CTHRC1 // CTHRC1 // GAP43 // PRE…	1.13835e-06
GO:0097155	biological_process	fasciculation of sensory neuron axon	14	EPHA4 // EPHA4 // EPHA4 // EPHA4 // EPHA4	1.20822e-06
GO:0097156	biological_process	fasciculation of motor neuron axon	14	EPHA4 // EPHA4 // EPHA4 // EPHA4 // EPHA4	1.20822e-06
GO:0050920	biological_process	regulation of chemotaxis	5	SCG2 // IL6 // ROBO2 // THBS1 // SERPINE1 // CXCR4 // CCL5 // CCL2 // GAS6 // VEGFA // CXCL10 // CCL19 // CCL4 // VEGFC	1.3043e-06
GO:0023052	biological_process	signaling	1	CARTPT // SCG2 // CYTL1 // ATRNL1 // GRIA1 // IL13RA2 // TNFRSF11B // COL4A3 // LGR5 // RGS1 // CNTN1 // GRIA2 // GRIA2 // GRIA2 // GRIA2 // GRIA2 // GRIA2 // GRIA2 // IL6 // IL6 // IL6 // ROBO2 // SOCS3 // DNER // CCL18 // SERPINE1 // PTN // F2R // UNC5B // ARL4C // CXCR4 // PDE10A // SFRP1 // STC1 // KRT17 // SCG5 // SCG5 // SCG5 // SCG5 // VCAM1 // BDNF // SELE // CCL5 // CCL2 // MEG3 // DKK3 …	1.36523e-06
GO:0044700	biological_process	single organism signaling	2	CARTPT // SCG2 // CYTL1 // ATRNL1 // GRIA1 // IL13RA2 // TNFRSF11B // COL4A3 // LGR5 // RGS1 // CNTN1 // GRIA2 // GRIA2 // GRIA2 // GRIA2 // GRIA2 // GRIA2 // GRIA2 // IL6 // IL6 // IL6 // ROBO2 // SOCS3 // DNER // CCL18 // SERPINE1 // PTN // F2R // UNC5B // ARL4C // CXCR4 // PDE10A // SFRP1 // STC1 // KRT17 // SCG5 // SCG5 // SCG5 // SCG5 // VCAM1 // BDNF // SELE // CCL5 // CCL2 // MEG3 // DKK3 …	1.36523e-06
GO:0002688	biological_process	regulation of leukocyte chemotaxis	8	IL6 // THBS1 // SERPINE1 // CCL5 // CCL2 // GAS6 // VEGFA // CXCL10 // CCL19 // CCL4 // VEGFC	1.3981e-06
GO:0042127	biological_process	regulation of cell proliferation	4	SCG2 // MAB21L2 // COL4A3 // MAB21L1 // IL6 // IL6 // IL6 // THBS1 // SERPINE1 // PTN // F2R // SFRP1 // VCAM1 // CDCA7L // BDNF // CCL5 // CCL2 // MEG3 // IGFBP2 // APOE // ST8SIA1 // ST8SIA1 // SOX8 // GAS6 // VDR // CD28 // CD28 // LAMB1 // EGR1 // HPSE // CTHRC1 // CTHRC1 // SGK1 // HTR2B // NOX4 // NOX4 // AKR1C3 // VEGFA // VEGFA // CXCL10 // CCL19 // RUNX1 // NAMPT // FRZB // TLR4 // TFAP2…	1.57763e-06
GO:0072358	biological_process	cardiovascular system development	6	SCG2 // SCG2 // SCG2 // CDH2 // CDH2 // CDH2 // SOCS3 // RBM20 // THBS1 // THBS1 // SERPINE1 // VCAN // CXCR4 // SFRP1 // VCAM1 // CCL2 // APOE // APOE // APOE // OXTR // OXTR // OXTR // SEMA4A // EGR1 // FN1 // HPSE // MMP19 // HTR2B // NOX4 // NOX4 // SLC12A6 // VEGFA // VEGFA // FRZB // TFAP2A // SHOX2 // VEGFC // MECOM // MECOM // MECOM // MECOM // MECOM	1.59627e-06
GO:0072359	biological_process	circulatory system development	5	SCG2 // SCG2 // SCG2 // CDH2 // CDH2 // CDH2 // SOCS3 // RBM20 // THBS1 // THBS1 // SERPINE1 // VCAN // CXCR4 // SFRP1 // VCAM1 // CCL2 // APOE // APOE // APOE // OXTR // OXTR // OXTR // SEMA4A // EGR1 // FN1 // HPSE // MMP19 // HTR2B // NOX4 // NOX4 // SLC12A6 // VEGFA // VEGFA // FRZB // TFAP2A // SHOX2 // VEGFC // MECOM // MECOM // MECOM // MECOM // MECOM	1.59627e-06
GO:0030030	biological_process	cell projection organization	3	COL4A3 // CNTN1 // CNTN1 // CNTN1 // CNTN1 // CNTN1 // IL6 // ROBO2 // COL4A4 // PTPRZ1 // UNC5B // CXCR4 // BDNF // MEG3 // APOE // APOE // APOE // WDR19 // WDR19 // WDR19 // SEMA4A // SEMA4A // SEMA4A // SEMA4A // ALCAM // ALCAM // LAMB1 // LAMB1 // EPHA4 // EPHA4 // EPHA4 // EPHA4 // EPHA4 // MCF2 // CTHRC1 // CTHRC1 // GAP43 // DNM3 // FRZB // ANK3 // ANK3 // ANK3 // ANK3 // FXYD5 // NCAM1 //…	1.59627e-06
GO:0002262	biological_process	myeloid cell homeostasis	5	IL6 // IL6 // IL6 // MECOM // MECOM // MECOM // MECOM // MECOM	1.99954e-06
GO:0032989	biological_process	cellular component morphogenesis	4	COL4A3 // CNTN1 // ROBO2 // COL4A4 // PTPRZ1 // UNC5B // CXCR4 // SFRP1 // BDNF // MEG3 // APOE // APOE // APOE // WDR19 // WDR19 // WDR19 // SEMA4A // SEMA4A // SEMA4A // SEMA4A // ALCAM // ALCAM // VDR // LAMB1 // EPHA4 // EPHA4 // EPHA4 // EPHA4 // EPHA4 // FN1 // GAP43 // NOX4 // NOX4 // IL7R // IL7R // IL7R // FRZB // ANK3 // ANK3 // ANK3 // ANK3 // HGF // HGF // HGF // NCAM1 // UCHL1 // UCH…	2.17468e-06
GO:0008284	biological_process	positive regulation of cell proliferation	5	SCG2 // MAB21L2 // MAB21L1 // IL6 // IL6 // IL6 // PTN // F2R // SFRP1 // VCAM1 // CDCA7L // CCL5 // CCL2 // IGFBP2 // ST8SIA1 // ST8SIA1 // SOX8 // GAS6 // CD28 // CD28 // LAMB1 // EGR1 // HPSE // CTHRC1 // CTHRC1 // HTR2B // AKR1C3 // VEGFA // VEGFA // CXCL10 // CCL19 // NAMPT // TLR4 // VEGFC // TNS3 // TNS3 // TNS3 // CDKN1A	2.85149e-06
GO:0007166	biological_process	cell surface receptor signaling pathway	5	CARTPT // ATRNL1 // IL13RA2 // COL4A3 // LGR5 // RGS1 // CNTN1 // GRIA2 // IL6 // IL6 // IL6 // SOCS3 // DNER // SERPINE1 // PTN // F2R // CXCR4 // SFRP1 // STC1 // SCG5 // SCG5 // SCG5 // SCG5 // VCAM1 // CCL5 // CCL2 // DKK3 // CXCL9 // IGKC // GLRB // ITGA10 // ITGA10 // ITGA10 // KRT18 // APOE // ITGA11 // ITGA11 // FCGR1B // GAS6 // MLLT11 // WDR19 // WDR19 // WDR19 // OXTR // SEMA4A // SEMA…	3.03283e-06
GO:0050921	biological_process	positive regulation of chemotaxis	6	SCG2 // IL6 // THBS1 // SERPINE1 // CCL5 // CCL2 // GAS6 // VEGFA // CXCL10 // CCL19 // CCL4 // VEGFC	3.03283e-06
GO:0048667	biological_process	cell morphogenesis involved in neuron differentiation	10	COL4A3 // CNTN1 // ROBO2 // COL4A4 // PTPRZ1 // UNC5B // CXCR4 // BDNF // MEG3 // APOE // APOE // APOE // SEMA4A // SEMA4A // SEMA4A // SEMA4A // ALCAM // ALCAM // LAMB1 // EPHA4 // EPHA4 // EPHA4 // EPHA4 // EPHA4 // GAP43 // FRZB // ANK3 // ANK3 // ANK3 // ANK3 // NCAM1 // UCHL1 // UCHL1	3.06238e-06
GO:0048870	biological_process	cell motility	4	SCG2 // SPP1 // CDH2 // CDH2 // CDH2 // SLC7A11 // SLC16A3 // IL6 // DNER // THBS1 // VCAN // ATP1B1 // CXCR4 // VCAM1 // SELE // CCL5 // CCL2 // SOX8 // GAS6 // LAMB1 // LAMB1 // EPHA4 // EPHA4 // EPHA4 // EPHA4 // EPHA4 // FN1 // CTHRC1 // CTHRC1 // HTR2B // VEGFA // VEGFA // NAV1 // CCL19 // HGF // VEGFC // TNS3 // TNS3 // TNS3	3.71055e-06
GO:0051674	biological_process	localization of cell	2	SCG2 // SPP1 // CDH2 // CDH2 // CDH2 // SLC7A11 // SLC16A3 // IL6 // DNER // THBS1 // VCAN // ATP1B1 // CXCR4 // VCAM1 // SELE // CCL5 // CCL2 // SOX8 // GAS6 // LAMB1 // LAMB1 // EPHA4 // EPHA4 // EPHA4 // EPHA4 // EPHA4 // FN1 // CTHRC1 // CTHRC1 // HTR2B // VEGFA // VEGFA // NAV1 // CCL19 // HGF // VEGFC // TNS3 // TNS3 // TNS3	3.71055e-06
GO:0006875	biological_process	cellular metal ion homeostasis	8	CP // CP // CP // CP // CP // CD55 // F2R // CXCR4 // STC1 // CCL5 // CCL2 // APOE // APOE // APOE // OXTR // OXTR // OXTR // VDR // VDR // VDR // VDR // HTR2B // CCL19 // CYSLTR1	4.04676e-06
GO:0030334	biological_process	regulation of cell migration	6	IL6 // THBS1 // SERPINE1 // F2R // CXCR4 // SFRP1 // ANXA3 // SELE // CCL5 // CCL2 // APOE // GAS6 // SEMA4A // SEMA4A // SEMA4A // SEMA4A // LAMB1 // MMP9 // SGK1 // NOX4 // NOX4 // VEGFA // CXCL10 // CCL19 // CCL4 // HGF // TFAP2A // VEGFC	4.49782e-06
GO:0002685	biological_process	regulation of leukocyte migration	7	IL6 // THBS1 // SERPINE1 // SELE // CCL5 // CCL2 // GAS6 // VEGFA // CXCL10 // CCL19 // CCL4 // VEGFC	4.53407e-06
GO:0040012	biological_process	regulation of locomotion	3	SCG2 // IL6 // ROBO2 // THBS1 // SERPINE1 // F2R // CXCR4 // SFRP1 // ANXA3 // SELE // CCL5 // CCL2 // APOE // GAS6 // SEMA4A // SEMA4A // SEMA4A // SEMA4A // LAMB1 // MMP9 // SGK1 // NOX4 // NOX4 // VEGFA // CXCL10 // CCL19 // CCL4 // HGF // TFAP2A // VEGFC	4.57062e-06
GO:0000904	biological_process	cell morphogenesis involved in differentiation	6	COL4A3 // CNTN1 // ROBO2 // COL4A4 // PTPRZ1 // UNC5B // CXCR4 // SFRP1 // BDNF // MEG3 // APOE // APOE // APOE // SEMA4A // SEMA4A // SEMA4A // SEMA4A // ALCAM // ALCAM // LAMB1 // EPHA4 // EPHA4 // EPHA4 // EPHA4 // EPHA4 // FN1 // GAP43 // FRZB // ANK3 // ANK3 // ANK3 // ANK3 // HGF // NCAM1 // UCHL1 // UCHL1	4.95267e-06
GO:0043408	biological_process	regulation of MAPK cascade	7	CARTPT // CDH2 // CDH2 // CDH2 // IL6 // IL6 // IL6 // THBS1 // F2R // CXCR4 // SFRP1 // APOE // GAS6 // DUSP6 // DUSP6 // EPHA4 // EPHA4 // EPHA4 // EPHA4 // EPHA4 // HTR2B // NOX4 // NOX4 // VEGFA // CCL19 // HGF // HGF // HGF // TLR4 // UCHL1 // MECOM	4.98176e-06
GO:0045597	biological_process	positive regulation of cell differentiation	5	CDH2 // IL6 // IL6 // IL6 // ROBO2 // SOCS3 // CXCR4 // SFRP1 // BDNF // MEG3 // APOE // APOE // APOE // SOX8 // GAS6 // PROM1 // VDR // EPHA4 // EPHA4 // EPHA4 // EPHA4 // EPHA4 // CTHRC1 // CTHRC1 // VEGFA // VEGFA // IL7R // IL7R // IL7R // CCL19 // RUNX1 // FRZB // ADAMTS9 // HGF // VEGFC	5.17698e-06
GO:0007165	biological_process	signal transduction	4	CARTPT // SCG2 // CYTL1 // ATRNL1 // GRIA1 // IL13RA2 // TNFRSF11B // COL4A3 // LGR5 // RGS1 // CNTN1 // GRIA2 // IL6 // IL6 // IL6 // SOCS3 // DNER // CCL18 // SERPINE1 // PTN // F2R // UNC5B // ARL4C // CXCR4 // PDE10A // SFRP1 // STC1 // KRT17 // SCG5 // SCG5 // SCG5 // SCG5 // VCAM1 // SELE // CCL5 // CCL2 // DKK3 // CHN2 // CHN2 // CHN2 // CHN2 // CHN2 // CHN2 // CHN2 // CHN2 // CHN2 // CHN2…	5.63744e-06
GO:0008347	biological_process	glial cell migration	8	VCAN // CCL2 // EPHA4 // EPHA4 // EPHA4 // EPHA4 // EPHA4	5.64405e-06
GO:0055082	biological_process	cellular chemical homeostasis	5	CARTPT // CP // CP // CP // CP // CP // CD55 // F2R // CXCR4 // STC1 // VCAM1 // BDNF // CCL5 // CCL2 // GLRB // APOE // APOE // APOE // GAS6 // OXTR // OXTR // OXTR // VDR // VDR // VDR // VDR // EHD3 // RIMS1 // HTR2B // NOX4 // NOX4 // CCL19 // ANK3 // ANK3 // ANK3 // ANK3 // CYSLTR1	7.55043e-06
GO:0008045	biological_process	motor neuron axon guidance	14	CXCR4 // ALCAM // ALCAM // EPHA4 // EPHA4 // EPHA4 // EPHA4 // EPHA4	7.88009e-06
GO:0055065	biological_process	metal ion homeostasis	7	CP // CP // CP // CP // CP // CD55 // F2R // CXCR4 // STC1 // CCL5 // CCL2 // APOE // APOE // APOE // OXTR // OXTR // OXTR // VDR // VDR // VDR // VDR // HTR2B // CCL19 // CYSLTR1	9.43427e-06
GO:0040017	biological_process	positive regulation of locomotion	4	SCG2 // IL6 // THBS1 // SERPINE1 // F2R // ANXA3 // SELE // CCL5 // CCL2 // GAS6 // LAMB1 // MMP9 // NOX4 // NOX4 // VEGFA // CXCL10 // CCL19 // CCL4 // HGF // TFAP2A // VEGFC	9.51759e-06
GO:0048812	biological_process	neuron projection morphogenesis	11	COL4A3 // CNTN1 // ROBO2 // COL4A4 // PTPRZ1 // UNC5B // CXCR4 // BDNF // MEG3 // APOE // APOE // APOE // SEMA4A // SEMA4A // SEMA4A // SEMA4A // ALCAM // ALCAM // LAMB1 // EPHA4 // EPHA4 // EPHA4 // EPHA4 // EPHA4 // GAP43 // FRZB // ANK3 // ANK3 // ANK3 // ANK3 // NCAM1 // UCHL1 // UCHL1	9.67832e-06
GO:0008038	biological_process	neuron recognition	10	ROBO2 // BDNF // EPHA4 // EPHA4 // EPHA4 // EPHA4 // EPHA4 // GAP43	9.67832e-06
GO:2000145	biological_process	regulation of cell motility	5	IL6 // THBS1 // SERPINE1 // F2R // CXCR4 // SFRP1 // ANXA3 // SELE // CCL5 // CCL2 // APOE // GAS6 // SEMA4A // SEMA4A // SEMA4A // SEMA4A // LAMB1 // MMP9 // SGK1 // NOX4 // NOX4 // VEGFA // CXCL10 // CCL19 // CCL4 // HGF // TFAP2A // VEGFC	9.71971e-06
GO:0055080	biological_process	cation homeostasis	6	CP // CP // CP // CP // CP // SLC26A4 // SLC26A4 // SLC26A4 // CD55 // F2R // CXCR4 // STC1 // CCL5 // CCL2 // APOE // APOE // APOE // OXTR // OXTR // OXTR // VDR // VDR // VDR // VDR // HTR2B // CCL19 // CYSLTR1	1.32044e-05
GO:0048520	biological_process	positive regulation of behavior	5	SCG2 // IL6 // THBS1 // SERPINE1 // CCL5 // CCL2 // GAS6 // VEGFA // CXCL10 // CCL19 // CCL4 // VEGFC	1.41732e-05
GO:0030335	biological_process	positive regulation of cell migration	7	IL6 // THBS1 // SERPINE1 // F2R // ANXA3 // SELE // CCL5 // CCL2 // GAS6 // LAMB1 // MMP9 // NOX4 // NOX4 // VEGFA // CXCL10 // CCL19 // CCL4 // HGF // TFAP2A // VEGFC	1.82655e-05
GO:0043410	biological_process	positive regulation of MAPK cascade	8	CDH2 // CDH2 // CDH2 // IL6 // IL6 // IL6 // THBS1 // F2R // CXCR4 // GAS6 // EPHA4 // EPHA4 // EPHA4 // EPHA4 // EPHA4 // HTR2B // NOX4 // NOX4 // VEGFA // CCL19 // HGF // HGF // HGF // TLR4	1.86683e-05
GO:0010646	biological_process	regulation of cell communication	4	CARTPT // CDH2 // CDH2 // CDH2 // RGS1 // PDE8B // PDE8B // PDE8B // IL6 // IL6 // IL6 // SOCS3 // THBS1 // SERPINE1 // F2R // UNC5B // CXCR4 // PDE10A // SFRP1 // SCG5 // BDNF // CCL5 // CCL2 // MEG3 // DKK3 // DKK3 // DKK3 // DKK3 // DKK3 // CHN2 // IGFBP2 // APOE // RGS16 // GAS6 // MLLT11 // OXTR // OXTR // OXTR // DUSP6 // DUSP6 // RHOJ // EGR1 // EPHA4 // EPHA4 // EPHA4 // EPHA4 // EPHA4 //…	1.95855e-05
GO:0023051	biological_process	regulation of signaling	3	CARTPT // CDH2 // CDH2 // CDH2 // RGS1 // PDE8B // PDE8B // PDE8B // IL6 // IL6 // IL6 // SOCS3 // THBS1 // SERPINE1 // F2R // UNC5B // CXCR4 // PDE10A // SFRP1 // SCG5 // BDNF // CCL5 // CCL2 // MEG3 // DKK3 // DKK3 // DKK3 // DKK3 // DKK3 // CHN2 // IGFBP2 // APOE // RGS16 // GAS6 // MLLT11 // OXTR // OXTR // OXTR // DUSP6 // DUSP6 // RHOJ // EGR1 // EPHA4 // EPHA4 // EPHA4 // EPHA4 // EPHA4 //…	1.95855e-05
GO:0051128	biological_process	regulation of cellular component organization	4	SPP1 // CNTN1 // CNTN1 // CNTN1 // CNTN1 // CNTN1 // IL6 // IL6 // IL6 // ROBO2 // THBS1 // SERPINE1 // SFRP1 // KRT17 // KRT17 // BDNF // SELE // CCL2 // IGFBP2 // APOE // APOE // APOE // GAS6 // MLLT11 // OXTR // OXTR // OXTR // SEMA4A // SEMA4A // SEMA4A // SEMA4A // CD28 // CD28 // RHOJ // EPHA4 // EPHA4 // EPHA4 // EPHA4 // EPHA4 // FN1 // GAP43 // GPM6B // SGK1 // NOX4 // NOX4 // PREX1 // A…	2.06675e-05
GO:0030003	biological_process	cellular cation homeostasis	7	CP // CP // CP // CP // CP // CD55 // F2R // CXCR4 // STC1 // CCL5 // CCL2 // APOE // APOE // APOE // OXTR // OXTR // OXTR // VDR // VDR // VDR // VDR // HTR2B // CCL19 // CYSLTR1	2.27851e-05
GO:2000147	biological_process	positive regulation of cell motility	6	IL6 // THBS1 // SERPINE1 // F2R // ANXA3 // SELE // CCL5 // CCL2 // GAS6 // LAMB1 // MMP9 // NOX4 // NOX4 // VEGFA // CXCL10 // CCL19 // CCL4 // HGF // TFAP2A // VEGFC	2.31675e-05
GO:0030178	biological_process	negative regulation of Wnt receptor signaling pathway	7	CDH2 // CDH2 // CDH2 // SFRP1 // DKK3 // DKK3 // DKK3 // DKK3 // DKK3 // EGR1 // CTHRC1 // CTHRC1 // SOST // FRZB	2.69089e-05
GO:0048679	biological_process	regulation of axon regeneration	12	SPP1 // EPHA4 // EPHA4 // EPHA4 // EPHA4 // EPHA4	2.79318e-05
GO:0070570	biological_process	regulation of neuron projection regeneration	11	SPP1 // EPHA4 // EPHA4 // EPHA4 // EPHA4 // EPHA4	2.79318e-05
GO:0048869	biological_process	cellular developmental process	3	CYTL1 // SPP1 // COL4A3 // CDH2 // CDH2 // CDH2 // SLC7A11 // CNTN1 // CNTN1 // CNTN1 // CNTN1 // CNTN1 // MEGF10 // IL6 // IL6 // IL6 // ROBO2 // COL4A4 // PTPRZ1 // SOCS3 // DNER // VCAN // F2R // UNC5B // CXCR4 // SFRP1 // KRT17 // KRT17 // VCAM1 // BDNF // CCL2 // MEG3 // APOE // APOE // APOE // SOX8 // GAS6 // MCOLN3 // PROM1 // WDR19 // WDR19 // WDR19 // SEMA4A // SEMA4A // SEMA4A // SEMA4A…	2.93313e-05
GO:0060137	biological_process	maternal process involved in parturition	5	CD55 // CCL2 // OXTR // OXTR // OXTR	2.96608e-05
GO:0021957	biological_process	corticospinal tract morphogenesis	15	EPHA4 // EPHA4 // EPHA4 // EPHA4 // EPHA4	2.96608e-05
GO:0045595	biological_process	regulation of cell differentiation	4	CARTPT // SPP1 // CDH2 // CNTN1 // CNTN1 // CNTN1 // CNTN1 // CNTN1 // MEGF10 // IL6 // IL6 // IL6 // ROBO2 // SOCS3 // CXCR4 // SFRP1 // BDNF // MEG3 // APOE // APOE // APOE // SOX8 // GAS6 // PROM1 // VDR // VDR // VDR // VDR // VDR // DUSP6 // EPHA4 // EPHA4 // EPHA4 // EPHA4 // EPHA4 // CTHRC1 // CTHRC1 // PREX1 // VEGFA // VEGFA // IL7R // IL7R // IL7R // CCL19 // RUNX1 // FRZB // ADAMTS9 //…	3.09312e-05
GO:0048858	biological_process	cell projection morphogenesis	6	COL4A3 // CNTN1 // ROBO2 // COL4A4 // PTPRZ1 // UNC5B // CXCR4 // BDNF // MEG3 // APOE // APOE // APOE // WDR19 // WDR19 // WDR19 // SEMA4A // SEMA4A // SEMA4A // SEMA4A // ALCAM // ALCAM // LAMB1 // EPHA4 // EPHA4 // EPHA4 // EPHA4 // EPHA4 // GAP43 // FRZB // ANK3 // ANK3 // ANK3 // ANK3 // NCAM1 // UCHL1 // UCHL1	3.09312e-05
GO:0043405	biological_process	regulation of MAP kinase activity	11	THBS1 // CXCR4 // SFRP1 // APOE // DUSP6 // EPHA4 // EPHA4 // EPHA4 // EPHA4 // EPHA4 // HTR2B // NOX4 // NOX4 // VEGFA // CCL19 // HGF // HGF // HGF // TLR4 // UCHL1	3.09312e-05
GO:0006874	biological_process	cellular calcium ion homeostasis	9	CD55 // F2R // CXCR4 // STC1 // CCL5 // CCL2 // APOE // APOE // APOE // OXTR // OXTR // OXTR // VDR // VDR // VDR // VDR // HTR2B // CCL19 // CYSLTR1	3.24569e-05
GO:0051130	biological_process	positive regulation of cellular component organization	5	CNTN1 // CNTN1 // CNTN1 // CNTN1 // CNTN1 // ROBO2 // SERPINE1 // SFRP1 // BDNF // SELE // CCL2 // APOE // APOE // APOE // GAS6 // MLLT11 // OXTR // OXTR // OXTR // CD28 // CD28 // EPHA4 // EPHA4 // EPHA4 // EPHA4 // EPHA4 // NOX4 // NOX4 // PTX3 // VEGFA // CCL19 // CDC42EP5	3.26634e-05
GO:0051272	biological_process	positive regulation of cellular component movement	5	IL6 // THBS1 // SERPINE1 // F2R // ANXA3 // SELE // CCL5 // CCL2 // GAS6 // LAMB1 // MMP9 // NOX4 // NOX4 // VEGFA // CXCL10 // CCL19 // CCL4 // HGF // TFAP2A // VEGFC	3.31673e-05
GO:0010627	biological_process	regulation of intracellular protein kinase cascade	6	CARTPT // CDH2 // CDH2 // CDH2 // IL6 // IL6 // IL6 // THBS1 // F2R // CXCR4 // PDE10A // SFRP1 // CCL5 // APOE // GAS6 // DUSP6 // DUSP6 // EPHA4 // EPHA4 // EPHA4 // EPHA4 // EPHA4 // HPSE // HTR2B // NOX4 // NOX4 // AKR1C3 // VEGFA // CCL19 // HGF // HGF // HGF // TLR4 // UCHL1 // TNFRSF10B // MECOM	3.38173e-05
GO:0007411	biological_process	axon guidance	13	COL4A3 // CNTN1 // ROBO2 // COL4A4 // UNC5B // CXCR4 // BDNF // MEG3 // SEMA4A // ALCAM // ALCAM // LAMB1 // EPHA4 // EPHA4 // EPHA4 // EPHA4 // EPHA4 // GAP43 // ANK3 // ANK3 // ANK3 // ANK3 // NCAM1	3.50167e-05
GO:0019725	biological_process	cellular homeostasis	4	CARTPT // CP // CP // CP // CP // CP // CD55 // IL6 // IL6 // IL6 // F2R // CXCR4 // STC1 // VCAM1 // BDNF // CCL5 // CCL2 // GLRB // APOE // APOE // APOE // GAS6 // OXTR // OXTR // OXTR // VDR // VDR // VDR // VDR // EHD3 // RIMS1 // HTR2B // NOX4 // NOX4 // CCL19 // ANK3 // ANK3 // ANK3 // ANK3 // CYSLTR1	3.84339e-05
GO:0034103	biological_process	regulation of tissue remodeling	4	CARTPT // SPP1 // TNFRSF11B // SFRP1 // VDR // VDR // VDR // VDR // VEGFA	4.03819e-05
GO:0032990	biological_process	cell part morphogenesis	5	COL4A3 // CNTN1 // ROBO2 // COL4A4 // PTPRZ1 // UNC5B // CXCR4 // BDNF // MEG3 // APOE // APOE // APOE // WDR19 // WDR19 // WDR19 // SEMA4A // SEMA4A // SEMA4A // SEMA4A // ALCAM // ALCAM // LAMB1 // EPHA4 // EPHA4 // EPHA4 // EPHA4 // EPHA4 // GAP43 // FRZB // ANK3 // ANK3 // ANK3 // ANK3 // NCAM1 // UCHL1 // UCHL1	4.44784e-05
GO:0042592	biological_process	homeostatic process	3	CARTPT // CP // CP // CP // CP // CP // SLC26A4 // SLC26A4 // SLC26A4 // CD55 // IL6 // IL6 // IL6 // F2R // CXCR4 // STC1 // VCAM1 // BDNF // CCL5 // CCL2 // GLRB // APOE // APOE // APOE // GAS6 // OXTR // OXTR // OXTR // VDR // VDR // VDR // VDR // EHD3 // RIMS1 // HTR2B // NOX4 // NOX4 // VEGFA // VEGFA // IL7R // IL7R // IL7R // CCL19 // ANK3 // ANK3 // ANK3 // ANK3 // TLR4 // CYSLTR1 // MECO…	4.79086e-05
GO:0060558	biological_process	regulation of calcidiol 1-monooxygenase activity	7	VDR // VDR // VDR // VDR // VDR	4.79086e-05
GO:0051897	biological_process	positive regulation of protein kinase B signaling cascade	8	IL6 // IL6 // IL6 // THBS1 // GAS6 // HPSE // NOX4 // NOX4 // AKR1C3 // CCL19	4.83082e-05
GO:0042221	biological_process	response to chemical stimulus	2	SCG2 // SPP1 // IL13RA2 // TNFRSF11B // COL4A3 // SLC7A11 // CNTN1 // CD55 // IL6 // IL6 // IL6 // ROBO2 // FOSB // FOSB // FOSB // FOSB // FOSB // COL4A4 // SOCS3 // THBS1 // CCL18 // SERPINE1 // F2R // UNC5B // CXCR4 // SFRP1 // STC1 // STC1 // VCAM1 // BDNF // SELE // CCL5 // CCL2 // MEG3 // CXCL9 // IGFBP2 // IGFBP2 // PDGFD // KRT18 // APOE // APOE // APOE // FCGR1B // GAS6 // CXCL2 // OXTR …	4.8768e-05
GO:0008037	biological_process	cell recognition	3	MEGF10 // ROBO2 // VCAN // BDNF // EPHA4 // EPHA4 // EPHA4 // EPHA4 // EPHA4 // GAP43 // CCL19	5.021e-05
GO:0006928	biological_process	cellular component movement	3	SCG2 // SPP1 // CDH2 // CDH2 // CDH2 // SLC7A11 // SLC16A3 // IL6 // SPINT2 // DNER // THBS1 // VCAN // ATP1B1 // CXCR4 // VCAM1 // SELE // CCL5 // CCL2 // SOX8 // GAS6 // LAMB1 // LAMB1 // EPHA4 // EPHA4 // EPHA4 // EPHA4 // EPHA4 // FN1 // ARHGDIB // CTHRC1 // CTHRC1 // HTR2B // VEGFA // VEGFA // NAV1 // CCL19 // CCL4 // HGF // VIM // VEGFC // TNS3 // TNS3 // TNS3 // UCHL1 // UCHL1	5.0583e-05
GO:0048878	biological_process	chemical homeostasis	4	CARTPT // CP // CP // CP // CP // CP // SLC26A4 // SLC26A4 // SLC26A4 // CD55 // F2R // CXCR4 // STC1 // VCAM1 // BDNF // CCL5 // CCL2 // GLRB // APOE // APOE // APOE // GAS6 // OXTR // OXTR // OXTR // VDR // VDR // VDR // VDR // EHD3 // RIMS1 // HTR2B // NOX4 // NOX4 // VEGFA // VEGFA // CCL19 // ANK3 // ANK3 // ANK3 // ANK3 // CYSLTR1	5.22452e-05
GO:0072503	biological_process	cellular divalent inorganic cation homeostasis	8	CD55 // F2R // CXCR4 // STC1 // CCL5 // CCL2 // APOE // APOE // APOE // OXTR // OXTR // OXTR // VDR // VDR // VDR // VDR // HTR2B // CCL19 // CYSLTR1	5.24324e-05
GO:0055074	biological_process	calcium ion homeostasis	8	CD55 // F2R // CXCR4 // STC1 // CCL5 // CCL2 // APOE // APOE // APOE // OXTR // OXTR // OXTR // VDR // VDR // VDR // VDR // HTR2B // CCL19 // CYSLTR1	5.45484e-05
GO:0051270	biological_process	regulation of cellular component movement	4	IL6 // THBS1 // SERPINE1 // F2R // CXCR4 // SFRP1 // ANXA3 // SELE // CCL5 // CCL2 // APOE // GAS6 // SEMA4A // SEMA4A // SEMA4A // SEMA4A // LAMB1 // MMP9 // SGK1 // NOX4 // NOX4 // VEGFA // CXCL10 // CCL19 // CCL4 // HGF // TFAP2A // VEGFC	5.70934e-05
GO:0022604	biological_process	regulation of cell morphogenesis	5	SPP1 // IL6 // IL6 // IL6 // ROBO2 // SFRP1 // CCL2 // APOE // APOE // APOE // SEMA4A // SEMA4A // SEMA4A // SEMA4A // RHOJ // EPHA4 // EPHA4 // EPHA4 // EPHA4 // EPHA4 // FN1 // VEGFA // CDC42EP5	5.85374e-05
GO:0051050	biological_process	positive regulation of transport	5	CARTPT // CNTN1 // CNTN1 // CNTN1 // CNTN1 // CNTN1 // IL6 // IL6 // IL6 // SERPINE1 // F2R // SELE // CCL5 // CCL2 // APOE // GAS6 // OXTR // OXTR // OXTR // SGK1 // HTR2B // PTX3 // VEGFA // CCL19 // RUNX1 // CCL4 // ANK3 // TLR4 // VEGFC	6.59647e-05
GO:0010740	biological_process	positive regulation of intracellular protein kinase cascade	7	CDH2 // CDH2 // CDH2 // IL6 // IL6 // IL6 // THBS1 // F2R // CXCR4 // CCL5 // GAS6 // EPHA4 // EPHA4 // EPHA4 // EPHA4 // EPHA4 // HPSE // HTR2B // NOX4 // NOX4 // AKR1C3 // VEGFA // CCL19 // HGF // HGF // HGF // TLR4 // TNFRSF10B	6.77524e-05
GO:0032317	biological_process	regulation of Rap GTPase activity	13	EPHA4 // EPHA4 // EPHA4 // EPHA4 // EPHA4	7.32278e-05
GO:0060284	biological_process	regulation of cell development	5	SPP1 // CNTN1 // CNTN1 // CNTN1 // CNTN1 // CNTN1 // IL6 // IL6 // IL6 // ROBO2 // CXCR4 // SFRP1 // BDNF // MEG3 // APOE // APOE // APOE // SOX8 // VDR // VDR // VDR // VDR // EPHA4 // EPHA4 // EPHA4 // EPHA4 // EPHA4 // PREX1 // VEGFA // VEGFA // FRZB // VIM // TFAP2A // VEGFC	7.70176e-05
GO:0048468	biological_process	cell development	5	COL4A3 // CNTN1 // CNTN1 // CNTN1 // CNTN1 // CNTN1 // MEGF10 // IL6 // ROBO2 // COL4A4 // PTPRZ1 // DNER // F2R // UNC5B // CXCR4 // SFRP1 // BDNF // MEG3 // APOE // APOE // APOE // SOX8 // SEMA4A // SEMA4A // SEMA4A // SEMA4A // ALCAM // ALCAM // LAMB1 // LAMB1 // EPHA4 // EPHA4 // EPHA4 // EPHA4 // EPHA4 // MCF2 // FN1 // CTHRC1 // CTHRC1 // GAP43 // HTR2B // DOK7 // VEGFA // VEGFA // CCL19 //…	9.13297e-05
GO:0014070	biological_process	response to organic cyclic compound	4	SPP1 // TNFRSF11B // SLC7A11 // IL6 // IL6 // IL6 // THBS1 // SFRP1 // STC1 // STC1 // BDNF // CCL5 // CCL2 // IGFBP2 // IGFBP2 // APOE // APOE // APOE // OXTR // OXTR // OXTR // VDR // DUSP6 // DUSP6 // EGR1 // CDO1 // MMP19 // NOX4 // NOX4 // AKR1C3 // CXCL10 // CCL19 // CDKN1A	9.66527e-05
GO:0072507	biological_process	divalent inorganic cation homeostasis	7	CD55 // F2R // CXCR4 // STC1 // CCL5 // CCL2 // APOE // APOE // APOE // OXTR // OXTR // OXTR // VDR // VDR // VDR // VDR // HTR2B // CCL19 // CYSLTR1	9.76778e-05
GO:0031667	biological_process	response to nutrient levels	4	CARTPT // SPP1 // TNFRSF11B // CTSD // CTSD // CTSD // IL6 // IL6 // IL6 // SFRP1 // STC1 // STC1 // VCAM1 // BDNF // CCL2 // IGFBP2 // IGFBP2 // GAS6 // VDR // EGR1 // AKR1C3 // CXCL10	0.000105513
GO:0031346	biological_process	positive regulation of cell projection organization	6	CNTN1 // CNTN1 // CNTN1 // CNTN1 // CNTN1 // ROBO2 // APOE // APOE // APOE // EPHA4 // EPHA4 // EPHA4 // EPHA4 // EPHA4 // CCL19 // CDC42EP5	0.000106554
GO:0050801	biological_process	ion homeostasis	5	CP // CP // CP // CP // CP // SLC26A4 // SLC26A4 // SLC26A4 // CD55 // F2R // CXCR4 // STC1 // BDNF // CCL5 // CCL2 // GLRB // APOE // APOE // APOE // OXTR // OXTR // OXTR // VDR // VDR // VDR // VDR // EHD3 // RIMS1 // HTR2B // CCL19 // ANK3 // ANK3 // ANK3 // ANK3 // CYSLTR1	0.000108765
GO:0009991	biological_process	response to extracellular stimulus	3	CARTPT // SPP1 // TNFRSF11B // CTSD // CTSD // CTSD // IL6 // IL6 // IL6 // SFRP1 // STC1 // STC1 // VCAM1 // BDNF // CCL2 // IGFBP2 // IGFBP2 // GAS6 // VDR // EGR1 // AKR1C3 // CXCL10 // CDKN1A	0.000127341
GO:0030154	biological_process	cell differentiation	4	CYTL1 // SPP1 // COL4A3 // CDH2 // CDH2 // CDH2 // SLC7A11 // CNTN1 // CNTN1 // CNTN1 // CNTN1 // CNTN1 // MEGF10 // IL6 // IL6 // IL6 // ROBO2 // COL4A4 // PTPRZ1 // SOCS3 // DNER // VCAN // F2R // UNC5B // CXCR4 // SFRP1 // KRT17 // KRT17 // VCAM1 // BDNF // CCL2 // MEG3 // APOE // APOE // APOE // SOX8 // GAS6 // MCOLN3 // PROM1 // SEMA4A // SEMA4A // SEMA4A // SEMA4A // ALCAM // ALCAM // DUSP6…	0.000130918
GO:0043406	biological_process	positive regulation of MAP kinase activity	12	THBS1 // CXCR4 // EPHA4 // EPHA4 // EPHA4 // EPHA4 // EPHA4 // HTR2B // NOX4 // NOX4 // VEGFA // CCL19 // HGF // HGF // HGF // TLR4	0.000140622
GO:0051960	biological_process	regulation of nervous system development	5	SPP1 // CNTN1 // CNTN1 // CNTN1 // CNTN1 // CNTN1 // IL6 // IL6 // IL6 // ROBO2 // CXCR4 // SFRP1 // BDNF // APOE // APOE // APOE // SOX8 // OXTR // OXTR // OXTR // EPHA4 // EPHA4 // EPHA4 // EPHA4 // EPHA4 // PREX1 // VEGFA // VEGFA // VIM // TFAP2A // VEGFC	0.000140918
GO:0007628	biological_process	adult walking behavior	6	GLRB // EPHA4 // EPHA4 // EPHA4 // EPHA4 // EPHA4 // UCHL1 // UCHL1	0.000155931
GO:0051240	biological_process	positive regulation of multicellular organismal process	4	CARTPT // SPP1 // IL6 // IL6 // IL6 // THBS1 // SERPINE1 // F2R // KRT17 // KRT17 // CCL2 // SOX8 // GAS6 // OXTR // OXTR // OXTR // VDR // VDR // VDR // VDR // EGR1 // HPSE // GPM6B // HTR2B // VEGFA // VEGFA // CCL19 // TLR4 // TFAP2A // CYSLTR1	0.000167911
GO:0045859	biological_process	regulation of protein kinase activity	9	CARTPT // IL6 // IL6 // IL6 // SOCS3 // THBS1 // F2R // CXCR4 // SFRP1 // CCL2 // APOE // GAS6 // DUSP6 // EPHA4 // EPHA4 // EPHA4 // EPHA4 // EPHA4 // HTR2B // DOK7 // NOX4 // NOX4 // VEGFA // CCL19 // HGF // HGF // HGF // TLR4 // CDKN1A // UCHL1 // TNFRSF10B	0.000173435
GO:0032103	biological_process	positive regulation of response to external stimulus	5	SCG2 // IL6 // THBS1 // SERPINE1 // CCL5 // CCL2 // GAS6 // CD28 // VEGFA // CXCL10 // CCL19 // CCL4 // TLR4 // VEGFC	0.000175227
GO:0051592	biological_process	response to calcium ion	5	IL6 // IL6 // IL6 // FOSB // FOSB // FOSB // FOSB // FOSB // THBS1 // HTR2B // AKR1C3	0.000175227
GO:0006873	biological_process	cellular ion homeostasis	6	CP // CP // CP // CP // CP // CD55 // F2R // CXCR4 // STC1 // BDNF // CCL5 // CCL2 // GLRB // APOE // APOE // APOE // OXTR // OXTR // OXTR // VDR // VDR // VDR // VDR // EHD3 // RIMS1 // HTR2B // CCL19 // ANK3 // ANK3 // ANK3 // ANK3 // CYSLTR1	0.000183294
GO:0001775	biological_process	cell activation	3	SLC7A11 // MEGF10 // IL6 // IL6 // IL6 // THBS1 // SERPINE1 // F2R // CXCR4 // ANXA3 // VCAM1 // CCL5 // GAS6 // SEMA4A // SEMA4A // SEMA4A // SEMA4A // CD28 // EGR1 // FN1 // PREX1 // VEGFA // F2RL2 // IL7R // IL7R // IL7R // CCL19 // HGF // TLR4 // VEGFC	0.000185693
GO:0032879	biological_process	regulation of localization	3	CARTPT // SLC26A4 // SLC26A4 // SLC26A4 // CNTN1 // CNTN1 // CNTN1 // CNTN1 // CNTN1 // PDE8B // PDE8B // PDE8B // IL6 // IL6 // IL6 // THBS1 // SERPINE1 // F2R // CXCR4 // SFRP1 // SCG5 // ANXA3 // SELE // CCL5 // CCL2 // APOE // GAS6 // OXTR // OXTR // OXTR // SEMA4A // SEMA4A // SEMA4A // SEMA4A // LAMB1 // MMP9 // GPM6B // SGK1 // HTR2B // NOX4 // NOX4 // APOC1 // PTX3 // VEGFA // CXCL10 // C…	0.000197621
GO:0044706	biological_process	multi-multicellular organism process	2	SPP1 // CD55 // STC1 // STC1 // CCL2 // IGFBP2 // IGFBP2 // OXTR // OXTR // OXTR // VDR // VDR // VDR // VDR // VDR // LAMB1 // LAMB1 // MMP9	0.000197621
GO:0009966	biological_process	regulation of signal transduction	5	CARTPT // CDH2 // CDH2 // CDH2 // RGS1 // IL6 // IL6 // IL6 // SOCS3 // THBS1 // SERPINE1 // F2R // UNC5B // CXCR4 // PDE10A // SFRP1 // CCL5 // MEG3 // DKK3 // DKK3 // DKK3 // DKK3 // DKK3 // CHN2 // IGFBP2 // APOE // RGS16 // GAS6 // MLLT11 // DUSP6 // DUSP6 // RHOJ // EGR1 // EPHA4 // EPHA4 // EPHA4 // EPHA4 // EPHA4 // MCF2 // MCF2 // MCF2 // MCF2 // ARHGAP18 // HPSE // ARHGDIB // CTHRC1 // C…	0.000217097
GO:0060453	biological_process	regulation of gastric acid secretion	6	OXTR // OXTR // OXTR // SGK1	0.000217097
GO:0060058	biological_process	positive regulation of apoptotic process involved in mammary gland involution	8	VDR // VDR // VDR // VDR	0.000217097
GO:0032487	biological_process	regulation of Rap protein signal transduction	8	EPHA4 // EPHA4 // EPHA4 // EPHA4 // EPHA4	0.00023103
GO:0003008	biological_process	system process	3	CARTPT // GRIA1 // COL4A3 // SLC26A4 // GRIA2 // GRIA2 // GRIA2 // GRIA2 // GRIA2 // GRIA2 // GRIA2 // ROBO2 // PTN // F2R // CXCR4 // BDNF // MEG3 // HMCN1 // GLRB // APOE // APOE // APOE // RGS16 // GAS6 // KCNK6 // PROM1 // WDR19 // WDR19 // WDR19 // OXTR // OXTR // OXTR // VDR // VDR // VDR // VDR // PENK // PENK // SMPX // EGR1 // RIMS1 // SGK1 // HTR2B // AKR1C3 // VEGFA // VEGFA // CXCL10 …	0.000237115
GO:0002376	biological_process	immune system process	1	SCG2 // SPP1 // CTSD // RGS1 // SLC7A11 // CD55 // SLC16A3 // IL6 // IL6 // IL6 // IL6 // IL6 // IL6 // IL6 // SOCS3 // THBS1 // CCL18 // ATP1B1 // CXCR4 // SFRP1 // ANXA3 // VCAM1 // SELE // CCL5 // CCL5 // CCL2 // CCL2 // CXCL9 // IGKC // IGJ // FCGR1B // GAS6 // CXCL2 // SEMA4A // SEMA4A // SEMA4A // SEMA4A // DUSP6 // GZMA // CD28 // CD28 // EGR1 // MMP9 // FN1 // ARHGDIB // ADSSL1 // PREX1 /…	0.000237115
GO:0050769	biological_process	positive regulation of neurogenesis	9	ROBO2 // CXCR4 // BDNF // APOE // APOE // APOE // SOX8 // EPHA4 // EPHA4 // EPHA4 // EPHA4 // EPHA4 // VEGFA // VEGFA // VEGFC	0.000258653
GO:0007565	biological_process	female pregnancy	4	SPP1 // STC1 // STC1 // IGFBP2 // IGFBP2 // OXTR // OXTR // OXTR // VDR // VDR // VDR // VDR // VDR // LAMB1 // LAMB1 // MMP9	0.000265312
GO:0051093	biological_process	negative regulation of developmental process	4	CARTPT // SPP1 // TNFRSF11B // COL4A3 // IL6 // IL6 // IL6 // ROBO2 // THBS1 // THBS1 // SERPINE1 // SFRP1 // BDNF // CCL2 // MEG3 // SOX8 // GAS6 // SEMA4A // SEMA4A // SEMA4A // SEMA4A // EPHA4 // EPHA4 // EPHA4 // EPHA4 // EPHA4 // CXCL10 // RUNX1 // THBS2 // THBS2 // FRZB // TLR4	0.000271523
GO:0051048	biological_process	negative regulation of secretion	6	CARTPT // PDE8B // PDE8B // PDE8B // IL6 // IL6 // IL6 // F2R // SFRP1 // GAS6 // OXTR // OXTR // OXTR	0.000282511
GO:0050900	biological_process	leukocyte migration	6	SCG2 // SPP1 // SLC7A11 // SLC16A3 // IL6 // ATP1B1 // CXCR4 // VCAM1 // SELE // CCL5 // CCL2 // GAS6 // FN1 // VEGFA // CCL19	0.000294273
GO:0033280	biological_process	response to vitamin D	7	SPP1 // SFRP1 // STC1 // STC1 // VDR // CXCL10	0.000321551
GO:0023056	biological_process	positive regulation of signaling	4	CARTPT // CDH2 // CDH2 // CDH2 // IL6 // IL6 // IL6 // THBS1 // F2R // CXCR4 // SFRP1 // CCL5 // CCL2 // GAS6 // OXTR // OXTR // OXTR // EGR1 // EPHA4 // EPHA4 // EPHA4 // EPHA4 // EPHA4 // HPSE // HTR2B // NOX4 // NOX4 // AKR1C3 // VEGFA // VEGFA // CCL19 // CCL4 // HGF // HGF // HGF // TLR4 // NCAM1 // TNFRSF10B	0.00035905
GO:0071277	biological_process	cellular response to calcium ion	7	FOSB // FOSB // FOSB // FOSB // FOSB // HTR2B // AKR1C3	0.000363777
GO:0070482	biological_process	response to oxygen levels	3	THBS1 // ATP1B1 // ATP1B1 // CXCR4 // SFRP1 // STC1 // STC1 // VCAM1 // BDNF // CCL2 // OXTR // OXTR // OXTR // EGR1 // NOX4 // NOX4 // VEGFA // VEGFA // CDKN1A	0.000372228
GO:0010647	biological_process	positive regulation of cell communication	5	CARTPT // CDH2 // CDH2 // CDH2 // IL6 // IL6 // IL6 // THBS1 // F2R // CXCR4 // SFRP1 // CCL5 // CCL2 // GAS6 // OXTR // OXTR // OXTR // EGR1 // EPHA4 // EPHA4 // EPHA4 // EPHA4 // EPHA4 // HPSE // HTR2B // NOX4 // NOX4 // AKR1C3 // VEGFA // VEGFA // CCL19 // CCL4 // HGF // HGF // HGF // TLR4 // NCAM1 // TNFRSF10B	0.000382452
GO:0043549	biological_process	regulation of kinase activity	8	CARTPT // IL6 // IL6 // IL6 // SOCS3 // THBS1 // F2R // CXCR4 // SFRP1 // CCL2 // APOE // GAS6 // DUSP6 // EPHA4 // EPHA4 // EPHA4 // EPHA4 // EPHA4 // HTR2B // DOK7 // NOX4 // NOX4 // VEGFA // CCL19 // HGF // HGF // HGF // TLR4 // CDKN1A // UCHL1 // TNFRSF10B	0.000384028
GO:0010765	biological_process	positive regulation of sodium ion transport	8	CNTN1 // CNTN1 // CNTN1 // CNTN1 // CNTN1 // ANK3	0.000384457
GO:0046849	biological_process	bone remodeling	4	IL6 // IL6 // IL6 // TPH1 // CTHRC1 // CTHRC1 // NOX4 // NOX4	0.000384457
GO:0036293	biological_process	response to decreased oxygen levels	4	THBS1 // ATP1B1 // ATP1B1 // CXCR4 // SFRP1 // STC1 // STC1 // VCAM1 // BDNF // CCL2 // OXTR // OXTR // OXTR // EGR1 // NOX4 // NOX4 // VEGFA // VEGFA	0.000384457
GO:0072661	biological_process	protein targeting to plasma membrane	9	GAS6 // EHD3 // ANK3 // ANK3 // ANK3 // ANK3	0.000384457
GO:0065008	biological_process	regulation of biological quality	2	CARTPT // SPP1 // DSC3 // CP // CP // CP // CP // CP // SLC26A4 // SLC26A4 // SLC26A4 // SLC7A11 // CD55 // SLC16A3 // IL6 // IL6 // IL6 // ROBO2 // THBS1 // SERPINE1 // F2R // ATP1B1 // CXCR4 // PDE10A // STC1 // SCG5 // VCAM1 // BDNF // CCL5 // CCL2 // MEG3 // GLRB // APOE // APOE // APOE // SOX8 // GAS6 // OXTR // OXTR // OXTR // SEMA4A // SEMA4A // SEMA4A // SEMA4A // VDR // VDR // VDR // VDR…	0.000385209
GO:0033690	biological_process	positive regulation of osteoblast proliferation	6	SOX8 // HPSE // CTHRC1 // CTHRC1	0.000385209
GO:0032102	biological_process	negative regulation of response to external stimulus	5	CARTPT // SPP1 // ROBO2 // SERPINE1 // CCL2 // APOE // APOE // APOE // EPHA4 // EPHA4 // EPHA4 // EPHA4 // EPHA4	0.000399696
GO:0008360	biological_process	regulation of cell shape	6	IL6 // IL6 // IL6 // CCL2 // SEMA4A // SEMA4A // SEMA4A // SEMA4A // RHOJ // FN1 // VEGFA // CDC42EP5	0.000399696
GO:0046903	biological_process	secretion	5	CARTPT // SCG2 // IL6 // IL6 // IL6 // THBS1 // SERPINE1 // ANXA3 // BDNF // CCL5 // MEG3 // GLRB // GAS6 // OXTR // VDR // VDR // VDR // VDR // FN1 // CDO1 // RIMS1 // VEGFA // VEGFA // CXCL10 // CCL19 // HGF // VEGFC	0.000404543
GO:0001944	biological_process	vasculature development	7	SCG2 // SCG2 // SCG2 // CDH2 // CDH2 // CDH2 // SOCS3 // THBS1 // THBS1 // SERPINE1 // CXCR4 // SFRP1 // CCL2 // APOE // APOE // APOE // SEMA4A // EGR1 // FN1 // HPSE // MMP19 // SLC12A6 // VEGFA // VEGFA // FRZB // VEGFC	0.000409402
GO:0042063	biological_process	gliogenesis	7	DNER // VCAN // CCL2 // APOE // APOE // APOE // SOX8 // EGR1 // EPHA4 // EPHA4 // EPHA4 // EPHA4 // EPHA4 // GAP43 // VIM	0.000457799
GO:0048771	biological_process	tissue remodeling	3	IL6 // IL6 // IL6 // F2R // TPH1 // CTHRC1 // CTHRC1 // NOX4 // NOX4 // VEGFA // FRZB	0.000458514
GO:0007595	biological_process	lactation	8	OXTR // VDR // VDR // VDR // VDR // CDO1 // VEGFA // VEGFA	0.000461006
GO:0071902	biological_process	positive regulation of protein serine/threonine kinase activity	11	THBS1 // CXCR4 // EPHA4 // EPHA4 // EPHA4 // EPHA4 // EPHA4 // HTR2B // NOX4 // NOX4 // VEGFA // CCL19 // HGF // HGF // HGF // TLR4 // TNFRSF10B	0.000467879
GO:0002696	biological_process	positive regulation of leukocyte activation	6	IL6 // IL6 // IL6 // THBS1 // VCAM1 // CCL5 // CCL2 // IGFBP2 // GAS6 // CD28 // CD28 // IL7R // IL7R // IL7R // CCL19 // TLR4 // CDKN1A	0.000485442
GO:0008015	biological_process	blood circulation	5	CARTPT // COL4A3 // F2R // APOE // APOE // APOE // GAS6 // OXTR // OXTR // OXTR // SGK1 // HTR2B // VEGFA // VEGFA // CXCL10 // VEGFC // PTGS1 // CTSZ	0.000485917
GO:0048583	biological_process	regulation of response to stimulus	3	CARTPT // SCG2 // SPP1 // CDH2 // CDH2 // CDH2 // RGS1 // CD55 // IL6 // IL6 // IL6 // ROBO2 // SOCS3 // THBS1 // SERPINE1 // F2R // UNC5B // CXCR4 // PDE10A // SFRP1 // VCAM1 // SELE // CCL5 // CCL2 // MEG3 // DKK3 // DKK3 // DKK3 // DKK3 // DKK3 // CHN2 // IGKC // IGFBP2 // APOE // APOE // APOE // FCGR1B // RGS16 // GAS6 // MLLT11 // DUSP6 // DUSP6 // CD28 // RHOJ // EGR1 // EPHA4 // EPHA4 // E…	0.000493108
GO:0033993	biological_process	response to lipid	4	SPP1 // TNFRSF11B // IL6 // IL6 // IL6 // THBS1 // SERPINE1 // F2R // SFRP1 // STC1 // STC1 // BDNF // SELE // CCL5 // CCL2 // IGFBP2 // IGFBP2 // APOE // APOE // APOE // OXTR // OXTR // OXTR // VDR // EGR1 // CDO1 // AKR1C3 // CXCL10 // CCL19 // TLR4 // CDKN1A	0.000500942
GO:0003013	biological_process	circulatory system process	4	CARTPT // COL4A3 // F2R // APOE // APOE // APOE // GAS6 // OXTR // OXTR // OXTR // SGK1 // HTR2B // VEGFA // VEGFA // CXCL10 // VEGFC // PTGS1 // CTSZ	0.000535926
GO:0007610	biological_process	behavior	2	CARTPT // IL6 // IL6 // IL6 // FOSB // PTN // BDNF // GLRB // MCOLN3 // OXTR // OXTR // OXTR // PENK // PENK // EGR1 // EPHA4 // EPHA4 // EPHA4 // EPHA4 // EPHA4 // SGK1 // HTR2B // VEGFA // RUNX1 // UCHL1 // UCHL1	0.000555897
GO:0046888	biological_process	negative regulation of hormone secretion	7	CARTPT // PDE8B // PDE8B // PDE8B // IL6 // IL6 // IL6 // SFRP1	0.000560165
GO:0071347	biological_process	cellular response to interleukin-1	7	SFRP1 // CCL5 // CCL2 // APOE // APOE // APOE // EGR1	0.00058249
GO:0010594	biological_process	regulation of endothelial cell migration	7	THBS1 // ANXA3 // APOE // SEMA4A // SEMA4A // SEMA4A // SEMA4A // VEGFA // VEGFC	0.000609412
GO:0010873	biological_process	positive regulation of cholesterol esterification	8	APOE // APOE // APOE // APOC1	0.000614278
GO:0051338	biological_process	regulation of transferase activity	5	CARTPT // IL6 // IL6 // IL6 // SOCS3 // THBS1 // F2R // CXCR4 // SFRP1 // CCL2 // APOE // GAS6 // DUSP6 // EPHA4 // EPHA4 // EPHA4 // EPHA4 // EPHA4 // HTR2B // DOK7 // NOX4 // NOX4 // VEGFA // CCL19 // HGF // HGF // HGF // TLR4 // CDKN1A // UCHL1 // TNFRSF10B	0.000638081
GO:0044708	biological_process	single-organism behavior	3	CARTPT // IL6 // IL6 // IL6 // PTN // BDNF // GLRB // MCOLN3 // OXTR // OXTR // OXTR // PENK // PENK // EGR1 // EPHA4 // EPHA4 // EPHA4 // EPHA4 // EPHA4 // SGK1 // RUNX1 // UCHL1 // UCHL1	0.000668785
GO:0090090	biological_process	negative regulation of canonical Wnt receptor signaling pathway	8	CDH2 // CDH2 // CDH2 // SFRP1 // DKK3 // EGR1 // CTHRC1 // CTHRC1 // SOST // FRZB	0.000676283
GO:0048514	biological_process	blood vessel morphogenesis	9	SCG2 // SCG2 // SCG2 // CDH2 // CDH2 // CDH2 // THBS1 // THBS1 // SERPINE1 // CXCR4 // CCL2 // APOE // APOE // APOE // SEMA4A // FN1 // HPSE // MMP19 // SLC12A6 // VEGFA // VEGFA // VEGFC	0.000680045
GO:0006950	biological_process	response to stress	2	CARTPT // SCG2 // SPP1 // CTSD // CTSD // CTSD // SLC7A11 // CD55 // SLC16A3 // IL6 // IL6 // IL6 // SOCS3 // THBS1 // THBS1 // CCL18 // SERPINE1 // F2R // ATP1B1 // ATP1B1 // CXCR4 // PDE10A // SFRP1 // STC1 // STC1 // ANXA3 // VCAM1 // BDNF // SELE // CCL5 // CCL2 // CXCL9 // IGKC // IGFBP2 // IGFBP2 // APOE // APOE // APOE // ST8SIA1 // ST8SIA1 // FCGR1B // GAS6 // CXCL2 // OXTR // OXTR // OXT…	0.000733002
GO:0007218	biological_process	neuropeptide signaling pathway	7	CARTPT // SCG5 // SCG5 // SCG5 // SCG5 // GLRB // PENK // PENK // PENK // PENK // PENK	0.000770944
GO:0051896	biological_process	regulation of protein kinase B signaling cascade	7	IL6 // IL6 // IL6 // THBS1 // GAS6 // HPSE // NOX4 // NOX4 // AKR1C3 // CCL19	0.000770944
GO:0050867	biological_process	positive regulation of cell activation	5	IL6 // IL6 // IL6 // THBS1 // VCAM1 // CCL5 // CCL2 // IGFBP2 // GAS6 // CD28 // CD28 // IL7R // IL7R // IL7R // CCL19 // TLR4 // CDKN1A	0.000772985
GO:0051251	biological_process	positive regulation of lymphocyte activation	7	IL6 // IL6 // IL6 // VCAM1 // CCL5 // CCL2 // IGFBP2 // GAS6 // CD28 // CD28 // IL7R // IL7R // IL7R // CCL19 // TLR4 // CDKN1A	0.000793377
GO:0071900	biological_process	regulation of protein serine/threonine kinase activity	10	THBS1 // CXCR4 // SFRP1 // APOE // DUSP6 // EPHA4 // EPHA4 // EPHA4 // EPHA4 // EPHA4 // HTR2B // NOX4 // NOX4 // VEGFA // CCL19 // HGF // HGF // HGF // TLR4 // CDKN1A // UCHL1 // TNFRSF10B	0.000835617
GO:0097305	biological_process	response to alcohol	4	SPP1 // SFRP1 // STC1 // STC1 // CCL2 // IGFBP2 // IGFBP2 // APOE // APOE // APOE // OXTR // OXTR // OXTR // VDR // EGR1 // CDO1 // CXCL10 // CDKN1A	0.000858422
GO:2000278	biological_process	regulation of DNA biosynthetic process	7	MEG3 // NOX4 // NOX4 // HGF // CDKN1A	0.000858422
GO:0090162	biological_process	establishment of epithelial cell polarity	5	FRMD4B // FRMD4B // FRMD4B // FRMD4B // FRMD4B	0.000858422
GO:0010720	biological_process	positive regulation of cell development	6	ROBO2 // CXCR4 // BDNF // MEG3 // APOE // APOE // APOE // SOX8 // EPHA4 // EPHA4 // EPHA4 // EPHA4 // EPHA4 // VEGFA // VEGFA // VEGFC	0.000880557
GO:0045860	biological_process	positive regulation of protein kinase activity	10	CARTPT // THBS1 // F2R // CXCR4 // CCL2 // GAS6 // EPHA4 // EPHA4 // EPHA4 // EPHA4 // EPHA4 // HTR2B // DOK7 // NOX4 // NOX4 // VEGFA // CCL19 // HGF // HGF // HGF // TLR4 // TNFRSF10B	0.00092136
GO:0033605	biological_process	positive regulation of catecholamine secretion	7	CARTPT // OXTR // OXTR // OXTR	0.000944482
GO:0031344	biological_process	regulation of cell projection organization	5	SPP1 // CNTN1 // CNTN1 // CNTN1 // CNTN1 // CNTN1 // ROBO2 // APOE // APOE // APOE // EPHA4 // EPHA4 // EPHA4 // EPHA4 // EPHA4 // GAP43 // PREX1 // CCL19 // VIM // CDC42EP5	0.000955827
GO:0009408	biological_process	response to heat	4	IL6 // IL6 // IL6 // THBS1 // CCL2 // ST8SIA1 // ST8SIA1 // CXCL10 // STAC	0.000955827
GO:0050767	biological_process	regulation of neurogenesis	8	SPP1 // CNTN1 // CNTN1 // CNTN1 // CNTN1 // CNTN1 // IL6 // IL6 // IL6 // ROBO2 // CXCR4 // BDNF // APOE // APOE // APOE // SOX8 // EPHA4 // EPHA4 // EPHA4 // EPHA4 // EPHA4 // PREX1 // VEGFA // VEGFA // VIM // TFAP2A // VEGFC	0.000999102
GO:0042088	biological_process	T-helper 1 type immune response	5	SEMA4A // SEMA4A // SEMA4A // SEMA4A // VEGFA // TLR4	0.000999102
GO:0009968	biological_process	negative regulation of signal transduction	6	CDH2 // CDH2 // CDH2 // RGS1 // SOCS3 // THBS1 // UNC5B // SFRP1 // CCL5 // MEG3 // DKK3 // DKK3 // DKK3 // DKK3 // DKK3 // APOE // RGS16 // GAS6 // DUSP6 // DUSP6 // EGR1 // CTHRC1 // CTHRC1 // HTR2B // SOST // SNX25 // SNX25 // FRZB // TLR4 // TFAP2A // UCHL1 // MECOM	0.00101923
GO:0007567	biological_process	parturition	4	CD55 // CCL2 // OXTR // OXTR // OXTR	0.00106179
GO:0033158	biological_process	regulation of protein import into nucleus, translocation	9	IL6 // IL6 // IL6 // GAS6 // CDKN1A	0.00106179
GO:0001568	biological_process	blood vessel development	8	SCG2 // SCG2 // SCG2 // CDH2 // CDH2 // CDH2 // SOCS3 // THBS1 // THBS1 // SERPINE1 // CXCR4 // CCL2 // APOE // APOE // APOE // SEMA4A // EGR1 // FN1 // HPSE // MMP19 // SLC12A6 // VEGFA // VEGFA // VEGFC	0.00119279
GO:0044765	biological_process	single-organism transport	4	CARTPT // SCG2 // SLC14A1 // CP // CP // CP // CP // CP // SLC26A4 // SLC26A4 // SLC26A4 // SLC7A11 // MEGF10 // SLC16A3 // SLC16A3 // SLC16A3 // SLC16A3 // SLC16A3 // SLC16A3 // SLC16A3 // SLC16A3 // SLC16A3 // IL6 // IL6 // IL6 // THBS1 // SERPINE1 // CA12 // F2R // ARL4C // ATP1B1 // ATP1B1 // ANXA3 // BDNF // CCL5 // MEG3 // IGKC // GLRB // KRT18 // APOE // APOE // APOE // APOE // GAS6 // KCN…	0.00127347
GO:0007413	biological_process	axonal fasciculation	13	EPHA4 // EPHA4 // EPHA4 // EPHA4 // EPHA4	0.00132991
GO:0009888	biological_process	tissue development	3	CYTL1 // SPP1 // MEGF10 // IL6 // IL6 // IL6 // SOCS3 // DNER // THBS1 // THBS1 // PTN // F2R // CXCR4 // SFRP1 // STC1 // STC1 // KRT17 // KRT17 // SOX8 // PROM1 // CST6 // VDR // VDR // VDR // VDR // VDR // EGR1 // CTHRC1 // CTHRC1 // RIPK4 // GAP43 // HTR2B // DOK7 // AKR1C3 // VEGFA // VEGFA // RUNX1 // NAMPT // FRZB // IBSP // HGF // TFAP2A // VEGFC // CTSZ // MECOM // MECOM // MECOM // MECO…	0.00133279
GO:0090002	biological_process	establishment of protein localization to plasma membrane	8	GAS6 // EHD3 // ANK3 // ANK3 // ANK3 // ANK3	0.00133279
GO:0010872	biological_process	regulation of cholesterol esterification	7	APOE // APOE // APOE // APOC1	0.00137065
GO:0010951	biological_process	negative regulation of endopeptidase activity	8	IL6 // IL6 // IL6 // SPINT2 // THBS1 // SERPINE1 // SFRP1 // SPINK1 // GAS6 // VEGFA // HGF	0.00147508
GO:0070555	biological_process	response to interleukin-1	5	SFRP1 // SELE // CCL5 // CCL2 // APOE // APOE // APOE // EGR1	0.00148558
GO:0001932	biological_process	regulation of protein phosphorylation	8	CARTPT // IL6 // IL6 // IL6 // SOCS3 // THBS1 // F2R // CXCR4 // SFRP1 // CCL5 // CCL2 // PDGFD // APOE // GAS6 // DUSP6 // DUSP6 // EPHA4 // EPHA4 // EPHA4 // EPHA4 // EPHA4 // HTR2B // DOK7 // NOX4 // NOX4 // VEGFA // CCL19 // HGF // HGF // HGF // TLR4 // VEGFC // CDKN1A // UCHL1 // TNFRSF10B	0.00150303
GO:0001934	biological_process	positive regulation of protein phosphorylation	9	CARTPT // IL6 // IL6 // IL6 // THBS1 // F2R // CXCR4 // CCL5 // CCL2 // GAS6 // EPHA4 // EPHA4 // EPHA4 // EPHA4 // EPHA4 // HTR2B // DOK7 // NOX4 // NOX4 // VEGFA // CCL19 // HGF // HGF // HGF // TLR4 // VEGFC // TNFRSF10B	0.00157245
GO:0032768	biological_process	regulation of monooxygenase activity	6	APOE // VDR // VDR // VDR // VDR // VDR // HTR2B	0.00157245
GO:0030111	biological_process	regulation of Wnt receptor signaling pathway	6	CDH2 // CDH2 // CDH2 // SFRP1 // DKK3 // DKK3 // DKK3 // DKK3 // DKK3 // EGR1 // CTHRC1 // CTHRC1 // SOST // FRZB	0.00160556
GO:0050679	biological_process	positive regulation of epithelial cell proliferation	6	SCG2 // IL6 // IL6 // IL6 // SFRP1 // CCL2 // LAMB1 // HTR2B // VEGFA // VEGFA // VEGFC	0.00161739
GO:0044093	biological_process	positive regulation of molecular function	3	CARTPT // CYTL1 // COL4A3 // RGS1 // IL6 // THBS1 // F2R // CXCR4 // SFRP1 // ANXA3 // SELE // CCL5 // CCL2 // CHN2 // APOE // RGS16 // GAS6 // CDC14B // VDR // EPHA4 // EPHA4 // EPHA4 // EPHA4 // EPHA4 // CTHRC1 // CTHRC1 // SGK1 // HTR2B // DOK7 // NOX4 // NOX4 // PREX1 // VEGFA // CCL19 // ANK3 // HGF // HGF // HGF // TLR4 // TNFRSF10B	0.00162738
GO:0007584	biological_process	response to nutrient	5	SPP1 // TNFRSF11B // SFRP1 // STC1 // STC1 // VCAM1 // BDNF // CCL2 // IGFBP2 // IGFBP2 // GAS6 // VDR // AKR1C3 // CXCL10	0.00166073
GO:0034097	biological_process	response to cytokine stimulus	4	IL13RA2 // IL6 // IL6 // IL6 // SOCS3 // SFRP1 // VCAM1 // SELE // CCL5 // CCL2 // KRT18 // APOE // APOE // APOE // FCGR1B // GAS6 // OXTR // OXTR // OXTR // EGR1 // CCRL1 // IL7R // TNFRSF25 // NCAM1	0.00166625
GO:0090150	biological_process	establishment of protein localization to membrane	7	GAS6 // EHD3 // ANK3 // ANK3 // ANK3 // ANK3	0.0017276
GO:0032941	biological_process	secretion by tissue	6	OXTR // VDR // VDR // VDR // VDR // CDO1 // VEGFA // VEGFA	0.0017276
GO:0010466	biological_process	negative regulation of peptidase activity	7	IL6 // IL6 // IL6 // SPINT2 // THBS1 // SERPINE1 // SFRP1 // SPINK1 // GAS6 // VEGFA // HGF	0.00178318
GO:0045664	biological_process	regulation of neuron differentiation	9	SPP1 // CNTN1 // CNTN1 // CNTN1 // CNTN1 // CNTN1 // IL6 // IL6 // IL6 // ROBO2 // BDNF // APOE // APOE // APOE // SOX8 // EPHA4 // EPHA4 // EPHA4 // EPHA4 // EPHA4 // PREX1 // VIM // TFAP2A	0.00178606
GO:0033674	biological_process	positive regulation of kinase activity	9	CARTPT // THBS1 // F2R // CXCR4 // CCL2 // GAS6 // EPHA4 // EPHA4 // EPHA4 // EPHA4 // EPHA4 // HTR2B // DOK7 // NOX4 // NOX4 // VEGFA // CCL19 // HGF // HGF // HGF // TLR4 // TNFRSF10B	0.00181128
GO:0050790	biological_process	regulation of catalytic activity	4	CARTPT // COL4A3 // RGS1 // IL6 // IL6 // IL6 // SPINT2 // SOCS3 // THBS1 // SERPINE1 // F2R // CXCR4 // SFRP1 // SELE // CCL5 // CCL2 // CHN2 // APOE // SPINK1 // RGS16 // GAS6 // CDC14B // VDR // VDR // VDR // VDR // VDR // DUSP6 // GZMA // EPHA4 // EPHA4 // EPHA4 // EPHA4 // EPHA4 // SGK1 // HTR2B // DOK7 // NOX4 // NOX4 // PREX1 // APOC1 // VEGFA // CCL19 // HGF // HGF // HGF // TLR4 // CDKN1…	0.00184631
GO:0051341	biological_process	regulation of oxidoreductase activity	5	APOE // VDR // VDR // VDR // VDR // VDR // GZMA // HTR2B	0.00185731
GO:0051971	biological_process	positive regulation of transmission of nerve impulse	7	CARTPT // IL6 // IL6 // IL6 // CCL2 // OXTR // OXTR // OXTR // EGR1	0.00188128
GO:0060745	biological_process	mammary gland branching involved in pregnancy	11	VDR // VDR // VDR // VDR	0.00188856
GO:0050918	biological_process	positive chemotaxis	5	SCG2 // CCL5 // VEGFA // HGF // VEGFC	0.00192221
GO:0042327	biological_process	positive regulation of phosphorylation	8	CARTPT // IL6 // IL6 // IL6 // THBS1 // F2R // CXCR4 // CCL5 // CCL2 // GAS6 // EPHA4 // EPHA4 // EPHA4 // EPHA4 // EPHA4 // HTR2B // DOK7 // NOX4 // NOX4 // VEGFA // CCL19 // HGF // HGF // HGF // TLR4 // VEGFC // TNFRSF10B	0.00203631
GO:0023057	biological_process	negative regulation of signaling	4	CDH2 // CDH2 // CDH2 // RGS1 // SOCS3 // THBS1 // UNC5B // SFRP1 // CCL5 // MEG3 // DKK3 // DKK3 // DKK3 // DKK3 // DKK3 // APOE // RGS16 // GAS6 // DUSP6 // DUSP6 // EGR1 // CTHRC1 // CTHRC1 // HTR2B // SOST // SNX25 // SNX25 // FRZB // TLR4 // TFAP2A // UCHL1 // MECOM	0.00212351
GO:0070372	biological_process	regulation of ERK1 and ERK2 cascade	8	IL6 // IL6 // IL6 // F2R // GAS6 // DUSP6 // DUSP6 // NOX4 // NOX4 // CCL19 // TLR4	0.00217223
GO:0010648	biological_process	negative regulation of cell communication	5	CDH2 // CDH2 // CDH2 // RGS1 // SOCS3 // THBS1 // UNC5B // SFRP1 // CCL5 // MEG3 // DKK3 // DKK3 // DKK3 // DKK3 // DKK3 // APOE // RGS16 // GAS6 // DUSP6 // DUSP6 // EGR1 // CTHRC1 // CTHRC1 // HTR2B // SOST // SNX25 // SNX25 // FRZB // TLR4 // TFAP2A // UCHL1 // MECOM	0.00227473
GO:0032314	biological_process	regulation of Rac GTPase activity	14	EPHA4 // EPHA4 // EPHA4 // EPHA4 // EPHA4	0.00233067
GO:0051347	biological_process	positive regulation of transferase activity	6	CARTPT // THBS1 // F2R // CXCR4 // CCL2 // GAS6 // EPHA4 // EPHA4 // EPHA4 // EPHA4 // EPHA4 // HTR2B // DOK7 // NOX4 // NOX4 // VEGFA // CCL19 // HGF // HGF // HGF // TLR4 // TNFRSF10B	0.0023316
GO:0009628	biological_process	response to abiotic stimulus	2	IL6 // IL6 // IL6 // THBS1 // ATP1B1 // ATP1B1 // CXCR4 // SFRP1 // STC1 // STC1 // VCAM1 // BDNF // CCL2 // IGFBP2 // IGFBP2 // APOE // ST8SIA1 // ST8SIA1 // OXTR // OXTR // OXTR // EGR1 // HTR2B // NOX4 // NOX4 // AKR1C3 // SLC12A6 // VEGFA // VEGFA // CXCL10 // SOST // KIAA0101 // TLR4 // STAC // CDKN1A // TNFRSF10B	0.00235269
GO:0070374	biological_process	positive regulation of ERK1 and ERK2 cascade	9	IL6 // IL6 // IL6 // F2R // GAS6 // NOX4 // NOX4 // CCL19 // TLR4	0.00244781
GO:0060135	biological_process	maternal process involved in female pregnancy	5	SPP1 // STC1 // STC1 // VDR // VDR // VDR // VDR // VDR	0.00252622
GO:0010977	biological_process	negative regulation of neuron projection development	11	SPP1 // EPHA4 // EPHA4 // EPHA4 // EPHA4 // EPHA4 // VIM	0.00252622
GO:0006955	biological_process	immune response	2	RGS1 // CD55 // IL6 // IL6 // IL6 // IL6 // IL6 // IL6 // IL6 // SOCS3 // THBS1 // CCL18 // ANXA3 // VCAM1 // CCL5 // CCL5 // CCL2 // CCL2 // CXCL9 // IGKC // IGJ // FCGR1B // GAS6 // CXCL2 // SEMA4A // SEMA4A // SEMA4A // SEMA4A // DUSP6 // GZMA // CD28 // CD28 // EGR1 // ARHGDIB // VEGFA // CXCL10 // CCRL1 // IL7R // CCL19 // CCL19 // CCL4 // TLR4 // IGSF6 // NCAM1	0.00256889
GO:0006952	biological_process	defense response	3	SCG2 // SPP1 // CD55 // IL6 // IL6 // IL6 // SOCS3 // THBS1 // THBS1 // CCL18 // SERPINE1 // F2R // CXCR4 // ANXA3 // VCAM1 // BDNF // SELE // CCL5 // CCL2 // CXCL9 // IGKC // FCGR1B // CXCL2 // DUSP6 // PENK // PENK // CD28 // EGR1 // FN1 // CDO1 // NOX4 // PTX3 // CXCL10 // CCL19 // CCL4 // TLR4 // CYSLTR1 // NCAM1 // MECOM // MECOM // MECOM // MECOM // MECOM	0.00257684
GO:0033688	biological_process	regulation of osteoblast proliferation	5	SFRP1 // SOX8 // HPSE // CTHRC1 // CTHRC1	0.00277411
GO:0043068	biological_process	positive regulation of programmed cell death	6	COL4A3 // IL6 // THBS1 // SFRP1 // CCL5 // MLLT11 // PHLDA1 // VDR // VDR // VDR // VDR // DUSP6 // GZMA // EGR1 // MMP9 // NOX4 // NOX4 // AKR1C3 // TNFRSF25 // FRZB // TFAP2A // CDKN1A	0.00278744
GO:0001781	biological_process	neutrophil apoptotic process	8	IL6 // IL6 // IL6	0.00281279
GO:0033028	biological_process	myeloid cell apoptotic process	7	IL6 // IL6 // IL6	0.00281279
GO:0045079	biological_process	negative regulation of chemokine biosynthetic process	8	IL6 // IL6 // IL6	0.00281279
GO:0050870	biological_process	positive regulation of T cell activation	8	IL6 // IL6 // IL6 // VCAM1 // CCL5 // CCL2 // IGFBP2 // CD28 // CD28 // IL7R // IL7R // IL7R // CCL19	0.00281279
GO:0007412	biological_process	axon target recognition	13	BDNF // UCHL1 // UCHL1	0.00281279
GO:0048872	biological_process	homeostasis of number of cells	4	IL6 // IL6 // IL6 // F2R // VEGFA // VEGFA // IL7R // IL7R // IL7R // MECOM // MECOM // MECOM // MECOM // MECOM	0.00281455
GO:0010975	biological_process	regulation of neuron projection development	10	SPP1 // CNTN1 // CNTN1 // CNTN1 // CNTN1 // CNTN1 // ROBO2 // APOE // APOE // APOE // EPHA4 // EPHA4 // EPHA4 // EPHA4 // EPHA4 // PREX1 // VIM	0.00289474
GO:0007267	biological_process	cell-cell signaling	4	CARTPT // GRIA1 // GRIA2 // GRIA2 // GRIA2 // GRIA2 // GRIA2 // GRIA2 // GRIA2 // IL6 // IL6 // IL6 // ROBO2 // CCL18 // SFRP1 // STC1 // BDNF // CCL5 // MEG3 // CXCL9 // GLRB // APOE // SOX8 // KCNK6 // OXTR // OXTR // OXTR // RIMS1 // CXCL10 // CCL4 // NAMPT // HGF // HGF // HGF // TFAP2A	0.00303222
GO:0031646	biological_process	positive regulation of neurological system process	6	CARTPT // IL6 // IL6 // IL6 // CCL2 // OXTR // OXTR // OXTR // EGR1	0.00309391
GO:0060429	biological_process	epithelium development	4	IL6 // IL6 // IL6 // SOCS3 // CXCR4 // SFRP1 // KRT17 // KRT17 // SOX8 // PROM1 // VDR // VDR // VDR // VDR // CTHRC1 // CTHRC1 // RIPK4 // AKR1C3 // VEGFA // VEGFA // FRZB // TFAP2A // VEGFC // CTSZ // MECOM // MECOM // MECOM // MECOM // MECOM	0.00309391
GO:0009266	biological_process	response to temperature stimulus	3	IL6 // IL6 // IL6 // THBS1 // CCL2 // ST8SIA1 // ST8SIA1 // HTR2B // VEGFA // CXCL10 // STAC	0.00313065
GO:0030001	biological_process	metal ion transport	7	CP // CP // CP // CP // CP // F2R // ATP1B1 // CCL5 // GAS6 // KCNK6 // VDR // VDR // VDR // VDR // SGK1 // HTR2B // SLC12A6 // CCL19 // SLC24A4 // CYSLTR1 // KCNT2	0.0034687
GO:0030595	biological_process	leukocyte chemotaxis	7	SCG2 // SPP1 // IL6 // CXCR4 // CCL5 // CCL2 // GAS6 // VEGFA // CCL19	0.00349805
GO:0071345	biological_process	cellular response to cytokine stimulus	6	IL13RA2 // IL6 // IL6 // IL6 // SOCS3 // SFRP1 // VCAM1 // CCL5 // CCL2 // KRT18 // APOE // APOE // APOE // FCGR1B // GAS6 // EGR1 // CCRL1 // IL7R // TNFRSF25 // NCAM1	0.00349805
GO:0043067	biological_process	regulation of programmed cell death	5	SCG2 // COL4A3 // IL6 // IL6 // IL6 // SOCS3 // THBS1 // SERPINE1 // F2R // UNC5B // SFRP1 // BDNF // CCL5 // CCL2 // KRT18 // APOE // APOE // APOE // SOX8 // GAS6 // MLLT11 // PHLDA1 // VDR // VDR // VDR // VDR // DUSP6 // GZMA // EGR1 // MMP9 // MCF2 // SGK1 // HTR2B // NOX4 // NOX4 // AKR1C3 // VEGFA // VEGFA // CCL19 // TNFRSF25 // FRZB // HGF // HGF // HGF // TFAP2A // CDKN1A // TNFRSF10B //…	0.00373177
GO:0006825	biological_process	copper ion transport	9	CP // CP // CP // CP // CP	0.00381708
GO:0050671	biological_process	positive regulation of lymphocyte proliferation	8	IL6 // VCAM1 // CCL5 // IGFBP2 // CD28 // CD28 // CCL19 // TLR4 // CDKN1A	0.00393589
GO:0032946	biological_process	positive regulation of mononuclear cell proliferation	7	IL6 // VCAM1 // CCL5 // IGFBP2 // CD28 // CD28 // CCL19 // TLR4 // CDKN1A	0.0041951
GO:0002009	biological_process	morphogenesis of an epithelium	5	IL6 // IL6 // IL6 // SOCS3 // CXCR4 // SFRP1 // KRT17 // KRT17 // SOX8 // VDR // VDR // VDR // VDR // CTHRC1 // CTHRC1 // RIPK4 // VEGFA // VEGFA // FRZB // TFAP2A // VEGFC // CTSZ	0.00428554
GO:0048511	biological_process	rhythmic process	1	CARTPT // IL6 // IL6 // IL6 // ROBO2 // SFRP1 // OXTR // OXTR // OXTR // TPH1 // EGR1 // MMP19 // VEGFA // VEGFA	0.00428578
GO:0042325	biological_process	regulation of phosphorylation	7	CARTPT // IL6 // IL6 // IL6 // SOCS3 // THBS1 // F2R // CXCR4 // SFRP1 // CCL5 // CCL2 // PDGFD // APOE // GAS6 // DUSP6 // DUSP6 // EPHA4 // EPHA4 // EPHA4 // EPHA4 // EPHA4 // HTR2B // DOK7 // NOX4 // NOX4 // VEGFA // CCL19 // HGF // HGF // HGF // TLR4 // VEGFC // CDKN1A // UCHL1 // TNFRSF10B	0.00440883
GO:0001776	biological_process	leukocyte homeostasis	5	IL6 // IL6 // IL6 // MECOM // MECOM // MECOM // MECOM // MECOM	0.00440883
GO:2000117	biological_process	negative regulation of cysteine-type endopeptidase activity	9	IL6 // IL6 // IL6 // THBS1 // SFRP1 // GAS6 // VEGFA // HGF	0.00440883
GO:0048710	biological_process	regulation of astrocyte differentiation	11	EPHA4 // EPHA4 // EPHA4 // EPHA4 // EPHA4	0.00441953
GO:2000027	biological_process	regulation of organ morphogenesis	5	TNFRSF11B // SFRP1 // BDNF // SOX8 // CTHRC1 // CTHRC1 // VEGFA // VEGFA // HGF // HGF // HGF // TFAP2A	0.00446477
GO:0009893	biological_process	positive regulation of metabolic process	4	CARTPT // CYTL1 // CNTN1 // CNTN1 // CNTN1 // CNTN1 // CNTN1 // IL6 // IL6 // IL6 // RBM20 // THBS1 // SERPINE1 // F2R // CXCR4 // SFRP1 // KRT17 // KRT17 // SELE // CCL5 // CCL2 // MEG3 // APOE // APOE // APOE // SOX8 // GAS6 // MLLT11 // CDC14B // VDR // CD28 // CD28 // EGR1 // EPHA4 // EPHA4 // EPHA4 // EPHA4 // EPHA4 // HTR2B // DOK7 // NOX4 // NOX4 // AKR1C3 // APOC1 // PTX3 // VEGFA // SOST…	0.00484956
GO:0010562	biological_process	positive regulation of phosphorus metabolic process	6	CARTPT // IL6 // IL6 // IL6 // THBS1 // F2R // CXCR4 // CCL5 // CCL2 // APOE // GAS6 // EPHA4 // EPHA4 // EPHA4 // EPHA4 // EPHA4 // HTR2B // DOK7 // NOX4 // NOX4 // VEGFA // CCL19 // HGF // HGF // HGF // TLR4 // VEGFC // TNFRSF10B	0.00484956
GO:0045937	biological_process	positive regulation of phosphate metabolic process	7	CARTPT // IL6 // IL6 // IL6 // THBS1 // F2R // CXCR4 // CCL5 // CCL2 // APOE // GAS6 // EPHA4 // EPHA4 // EPHA4 // EPHA4 // EPHA4 // HTR2B // DOK7 // NOX4 // NOX4 // VEGFA // CCL19 // HGF // HGF // HGF // TLR4 // VEGFC // TNFRSF10B	0.00484956
GO:0033273	biological_process	response to vitamin	6	SPP1 // SFRP1 // STC1 // STC1 // BDNF // CCL2 // GAS6 // VDR // CXCL10	0.00489183
GO:0010942	biological_process	positive regulation of cell death	5	COL4A3 // IL6 // THBS1 // SFRP1 // CCL5 // MLLT11 // PHLDA1 // VDR // VDR // VDR // VDR // DUSP6 // GZMA // EGR1 // MMP9 // NOX4 // NOX4 // AKR1C3 // TNFRSF25 // FRZB // TFAP2A // CDKN1A	0.00489183
GO:0070665	biological_process	positive regulation of leukocyte proliferation	6	IL6 // VCAM1 // CCL5 // IGFBP2 // CD28 // CD28 // CCL19 // TLR4 // CDKN1A	0.00489183
GO:2000501	biological_process	regulation of natural killer cell chemotaxis	10	CCL5 // CCL2 // CCL4	0.00498003
GO:0060406	biological_process	positive regulation of penile erection	5	OXTR // OXTR // OXTR	0.00498003
GO:0060455	biological_process	negative regulation of gastric acid secretion	7	OXTR // OXTR // OXTR	0.00498003
GO:0048012	biological_process	hepatocyte growth factor receptor signaling pathway	8	HGF // HGF // HGF	0.00498003
GO:0034105	biological_process	positive regulation of tissue remodeling	5	SPP1 // VDR // VDR // VDR // VDR	0.00501812
GO:0050775	biological_process	positive regulation of dendrite morphogenesis	13	EPHA4 // EPHA4 // EPHA4 // EPHA4 // EPHA4	0.00501812
GO:0060326	biological_process	cell chemotaxis	6	SCG2 // SPP1 // IL6 // CXCR4 // CCL5 // CCL2 // GAS6 // VEGFA // CCL19 // HGF	0.00515065
GO:0042493	biological_process	response to drug	3	TNFRSF11B // IL6 // IL6 // IL6 // THBS1 // SFRP1 // BDNF // CCL2 // IGFBP2 // IGFBP2 // GAS6 // OXTR // OXTR // OXTR // DUSP6 // DUSP6 // EGR1 // CD69 // CD69 // HTR2B // VEGFC // CDKN1A	0.00520428
GO:0043085	biological_process	positive regulation of catalytic activity	5	CARTPT // COL4A3 // RGS1 // THBS1 // F2R // CXCR4 // SFRP1 // SELE // CCL5 // CCL2 // CHN2 // APOE // RGS16 // GAS6 // CDC14B // VDR // EPHA4 // EPHA4 // EPHA4 // EPHA4 // EPHA4 // HTR2B // DOK7 // NOX4 // NOX4 // PREX1 // VEGFA // CCL19 // HGF // HGF // HGF // TLR4 // TNFRSF10B	0.00536083
GO:0042981	biological_process	regulation of apoptotic process	6	SCG2 // COL4A3 // IL6 // IL6 // IL6 // SOCS3 // THBS1 // SERPINE1 // F2R // UNC5B // SFRP1 // BDNF // CCL5 // CCL2 // KRT18 // APOE // APOE // APOE // SOX8 // GAS6 // MLLT11 // PHLDA1 // VDR // VDR // VDR // VDR // DUSP6 // GZMA // EGR1 // MMP9 // MCF2 // SGK1 // HTR2B // NOX4 // NOX4 // AKR1C3 // VEGFA // VEGFA // CCL19 // TNFRSF25 // FRZB // HGF // HGF // HGF // TFAP2A // CDKN1A // TNFRSF10B	0.00537498
GO:0072657	biological_process	protein localization to membrane	6	GAS6 // WDR19 // WDR19 // WDR19 // EHD3 // DOK7 // ANK3 // ANK3 // ANK3 // ANK3	0.00537498
GO:0043065	biological_process	positive regulation of apoptotic process	7	COL4A3 // IL6 // THBS1 // SFRP1 // CCL5 // MLLT11 // PHLDA1 // VDR // VDR // VDR // VDR // DUSP6 // GZMA // EGR1 // MMP9 // NOX4 // NOX4 // AKR1C3 // TNFRSF25 // FRZB // TFAP2A	0.00554204
GO:0071407	biological_process	cellular response to organic cyclic compound	6	SFRP1 // STC1 // STC1 // CCL5 // CCL2 // APOE // APOE // APOE // VDR // EGR1 // NOX4 // NOX4 // AKR1C3	0.0058755
GO:0034605	biological_process	cellular response to heat	5	THBS1 // ST8SIA1 // ST8SIA1 // CXCL10 // STAC	0.00673425
GO:0010038	biological_process	response to metal ion	4	TNFRSF11B // IL6 // IL6 // IL6 // FOSB // FOSB // FOSB // FOSB // FOSB // THBS1 // IGFBP2 // IGFBP2 // HTR2B // AKR1C3 // TFAP2A	0.00673618
GO:0052548	biological_process	regulation of endopeptidase activity	7	COL4A3 // IL6 // IL6 // IL6 // SPINT2 // THBS1 // SERPINE1 // F2R // SFRP1 // SPINK1 // GAS6 // VEGFA // HGF // TNFRSF10B	0.00678576
GO:0045063	biological_process	T-helper 1 cell differentiation	15	SEMA4A // SEMA4A // SEMA4A // SEMA4A	0.00684629
GO:0007417	biological_process	central nervous system development	6	SLC7A11 // CNTN1 // CNTN1 // CNTN1 // CNTN1 // CNTN1 // ROBO2 // PTPRZ1 // DNER // CXCR4 // SFRP1 // APOE // APOE // APOE // SOX8 // OXTR // OXTR // OXTR // EGR1 // EPHA4 // EPHA4 // EPHA4 // EPHA4 // EPHA4 // RUNX1 // FRZB // VIM // TFAP2A // MECOM // MECOM // MECOM // MECOM // MECOM	0.00694343
GO:0009725	biological_process	response to hormone stimulus	4	SPP1 // TNFRSF11B // CD55 // IL6 // IL6 // IL6 // ROBO2 // SOCS3 // THBS1 // SFRP1 // STC1 // STC1 // BDNF // CCL2 // IGFBP2 // IGFBP2 // APOE // APOE // APOE // OXTR // OXTR // OXTR // EGR1 // CDO1 // MMP19 // AKR1C3 // SOST // CCL19 // NAMPT // CDKN1A	0.00753045
GO:0042755	biological_process	eating behavior	4	OXTR // OXTR // OXTR // UCHL1 // UCHL1	0.00762869
GO:0061001	biological_process	regulation of dendritic spine morphogenesis	13	EPHA4 // EPHA4 // EPHA4 // EPHA4 // EPHA4	0.00762869
GO:0045621	biological_process	positive regulation of lymphocyte differentiation	8	IL6 // IL6 // IL6 // GAS6 // IL7R // IL7R // IL7R // CCL19	0.00766726
GO:0051049	biological_process	regulation of transport	4	CARTPT // CNTN1 // CNTN1 // CNTN1 // CNTN1 // CNTN1 // PDE8B // PDE8B // PDE8B // IL6 // IL6 // IL6 // THBS1 // SERPINE1 // F2R // SFRP1 // SCG5 // SELE // CCL5 // CCL2 // APOE // GAS6 // OXTR // OXTR // OXTR // GPM6B // SGK1 // HTR2B // APOC1 // PTX3 // VEGFA // CCL19 // RUNX1 // CCL4 // ANK3 // TLR4 // VEGFC // NCAM1 // CDKN1A	0.00777495
GO:0032270	biological_process	positive regulation of cellular protein metabolic process	7	CARTPT // IL6 // IL6 // IL6 // THBS1 // F2R // CXCR4 // KRT17 // KRT17 // CCL5 // CCL2 // APOE // GAS6 // CDC14B // CD28 // EPHA4 // EPHA4 // EPHA4 // EPHA4 // EPHA4 // HTR2B // DOK7 // NOX4 // NOX4 // VEGFA // CCL19 // HGF // HGF // HGF // TLR4 // VEGFC // TNFRSF10B	0.00783191
GO:0001915	biological_process	negative regulation of T cell mediated cytotoxicity	9	IL7R // IL7R // IL7R	0.00795823
GO:0051450	biological_process	myoblast proliferation	3	HGF // HGF // HGF	0.00795823
GO:0010941	biological_process	regulation of cell death	4	SCG2 // COL4A3 // IL6 // IL6 // IL6 // SOCS3 // THBS1 // SERPINE1 // F2R // UNC5B // SFRP1 // BDNF // CCL5 // CCL2 // KRT18 // APOE // APOE // APOE // SOX8 // GAS6 // MLLT11 // PHLDA1 // VDR // VDR // VDR // VDR // DUSP6 // GZMA // EGR1 // MMP9 // MCF2 // SGK1 // HTR2B // NOX4 // NOX4 // AKR1C3 // VEGFA // VEGFA // CCL19 // TNFRSF25 // FRZB // HGF // HGF // HGF // TFAP2A // CDKN1A // TNFRSF10B //…	0.00808919
GO:0061138	biological_process	morphogenesis of a branching epithelium	6	IL6 // IL6 // IL6 // SOCS3 // CXCR4 // SFRP1 // SOX8 // VDR // VDR // VDR // VDR // VEGFA // VEGFA // CTSZ	0.00858244
GO:0035115	biological_process	embryonic forelimb morphogenesis	8	TFAP2A // MECOM // MECOM // MECOM // MECOM // MECOM	0.00859638
GO:0006811	biological_process	ion transport	5	CP // CP // CP // CP // CP // SLC26A4 // SLC26A4 // SLC26A4 // SLC7A11 // SLC16A3 // CA12 // F2R // ATP1B1 // ATP1B1 // BDNF // CCL5 // GLRB // GAS6 // KCNK6 // MCOLN3 // VDR // VDR // VDR // VDR // ABCC3 // MCOLN2 // RIMS1 // SGK1 // HTR2B // SLC12A6 // CCL19 // SLC24A4 // CYSLTR1 // KCNT2 // SLC6A6	0.00880706
GO:0052547	biological_process	regulation of peptidase activity	6	COL4A3 // IL6 // IL6 // IL6 // SPINT2 // THBS1 // SERPINE1 // F2R // SFRP1 // SPINK1 // GAS6 // VEGFA // HGF // TNFRSF10B	0.00881682
GO:0050770	biological_process	regulation of axonogenesis	11	SPP1 // ROBO2 // APOE // APOE // APOE // EPHA4 // EPHA4 // EPHA4 // EPHA4 // EPHA4	0.00931823
GO:0009967	biological_process	positive regulation of signal transduction	6	CDH2 // CDH2 // CDH2 // IL6 // IL6 // IL6 // THBS1 // F2R // CXCR4 // SFRP1 // CCL5 // GAS6 // EPHA4 // EPHA4 // EPHA4 // EPHA4 // EPHA4 // HPSE // HTR2B // NOX4 // NOX4 // AKR1C3 // VEGFA // VEGFA // CCL19 // CCL4 // HGF // HGF // HGF // TLR4 // NCAM1 // TNFRSF10B	0.0096879
GO:0001666	biological_process	response to hypoxia	5	THBS1 // ATP1B1 // ATP1B1 // CXCR4 // SFRP1 // STC1 // STC1 // VCAM1 // BDNF // CCL2 // EGR1 // NOX4 // NOX4 // VEGFA // VEGFA	0.00989273

## Sheet: carotid_2up
Table S3. Genes upregulated in carotid plaques. Presence of regulatory elements marked with a +.
gene symbol	logFC	GAS	ISRE	NFkB	STAT_NFkB	STAT_IRF	IFNg-LPS STAT1 targets	IFNg-STAT1 tgts	LPS_STAT1 tgts
SPP1	7.66778				+	+
MMP12	7.12194					+
CCL18	7.06329				+	+
IGLL3	6.64251
APOC1	6.59444	+		+
S100A8	6.54197				+	+
CHI3L1	6.46253			+	+	+
MMP9	6.43319			+	+	+
IGJ	6.31916	+		+	+	+
CD52	6.2941				+	+
IFI30	6.12591				+
S100A9	5.52588	+		+		+
IGKC	5.51611
CD163	5.3852					+
BCL2A1	5.24615		+			+
PLA2G7	5.18609				+	+
MS4A4A	5.09776					+
C1QB	5.09377					+
ACP5	5.03437	+		+	+
CTSS	5.01459					+
NPL	4.97337
CD36	4.95367				+	+
VAMP8	4.92541					+
LYZ	4.88581				+
HMOX1	4.77595				+	+
LAPTM5	4.64951				+	+
TYROBP	4.58139
ADAMDEC1	4.54834		+			+
CCL5	4.54305		+	+	+	+	+	+	+
APOE	4.52891					+
LOC91316	4.4937
HLA-DRA	4.45018					+
CP	4.32307				+	+
CD14	4.32301		+
HLA-DQB1	4.30251				+	+		+
GPR65	4.29353					+
GMFG	4.2541				+
SAMSN1	4.25315				+	+
TREM1	4.25054					+
CSTA	4.20015				+
RNASE1	4.19759					+
CPVL	4.16993		+		+	+
C3AR1	4.15686
GNA13	4.13277		+		+	+	+	+
HBB	4.12849					+
HCK	4.12245				+	+
STMN3	4.11337				+	+
LPL	4.09961					+
HLA-DMB	4.09816							+
CXCR4	4.08148				+	+
KRT14	4.02421			+	+	+
LCP2	3.99606		+		+	+
TMEM176B	3.96957			+	+	+
MNDA	3.96496					+
CTSH	3.9464				+	+
APBB1IP	3.92654					+
PTPRC	3.92331				+	+
SLAMF8	3.91784					+	+	+
MMP1	3.91647				+	+
EVI2B	3.89857					+
CPM	3.87251				+	+
ANPEP	3.87187				+	+
RGS1	3.86747					+
LY96	3.86545					+
CAPG	3.84654			+	+	+
SNX10	3.7607		+		+	+		+
SERPINA1	3.74576				+	+
MS4A6A	3.71284		+		+	+
CD53	3.69905	+	+		+	+
FAM70A	3.67397		+		+	+
FCGR2B	3.67224	+	+		+	+
HLA-DPA1	3.66731					+
CD300A	3.65731		+	+	+	+
FRMD4B	3.64845				+	+
LCP1	3.61836			+	+	+
TRBC2	3.60556
LILRB2	3.5976				+
PYCARD	3.58915	+	+			+
CHIT1	3.58694				+	+
MMP7	3.58622
ITGB2	3.54413		+		+	+
ITGAM	3.52356				+	+
VCAM1	3.498			+	+	+
SLC14A1	3.49787				+	+
HLA-DRB1	3.4975		+					+
DOCK2	3.49732		+		+	+
CCR5	3.47513					+
DENND2D	3.47494				+	+
IBSP	3.4637						+		+
CTSB	3.46246				+	+
LILRB4	3.45609				+	+
ITGAX	3.43276				+	+
C1QA	3.42848				+
OBFC2A	3.42536					+
NCF2	3.39599					+
ABCA1	3.39198				+	+
CCL2	3.37603	+			+	+	+	+	+
STEAP4	3.37183	+		+	+	+
FPR3	3.36581
TIMP2	3.35797	+			+	+
CECR1	3.35625		+
CCR1	3.33983	+			+	+
BID	3.33817				+	+		+
VSIG4	3.32422					+
IGSF6	3.32092				+	+
PTPN6	3.30515			+	+	+
KYNU	3.2984				+	+
RNASE6	3.28319				+	+
TFEC	3.28315					+
GPR137B	3.27928				+	+
PTPRJ	3.27023				+	+
HCLS1	3.25872					+
LIPA	3.25022				+	+
IQGAP2	3.24941				+	+
SYK	3.24746				+	+
LGMN	3.21224				+	+
HLA-DMA	3.2072				+	+	+	+
ZBTB33	3.20465		+			+
EVI2A	3.1991				+	+
FCER1G	3.19216
CTSZ	3.19109				+
ABCG1	3.18925	+	+		+	+
FBP1	3.18056	+			+	+
SCYL2	3.16419	+			+	+
SMPDL3A	3.16402				+	+
CCL8	3.14341					+
IRF8	3.13135				+	+	+	+
DPEP2	3.12452				+	+
C13orf15	3.10054			+
F13A1	3.09512			+	+	+
ELTD1	3.09397				+	+
IGLV2-14	3.08872
TNFRSF21	3.08004				+	+
RNASET2	3.07433	+				+
HLA-DQA1	3.07375				+	+	+	+
IL10RA	3.04979				+
ARL4C	3.04287
CD3D	3.03812					+
CASP1	3.02914		+		+	+	+	+
PILRA	3.02639
PLTP	3.02457	+	+		+
RASGRP3	3.01446	+			+	+
SLC16A3	3.00792	+			+
LYN	3.0045					+
TSPAN13	2.9934				+	+
CD37	2.9829
TNFSF10	2.98095		+	+		+
MCTP1	2.97781				+	+
CLEC5A	2.97594				+
VNN1	2.9715		+	+		+
CD86	2.96901	+	+	+	+	+
UCP2	2.96886					+
HLA-DPB1	2.95706					+
SRGN	2.95002		+			+
TLR1	2.91015	+			+	+
HAMP	2.90692
PLBD1	2.89332				+	+
HS3ST2	2.87152				+
IGKV4-1	2.8652
C1orf38	2.86179
AIF1	2.86131				+	+
GNA15	2.85664				+	+
OAS1	2.85475				+	+	+	+
BMP2K	2.85141				+	+
GLRX	2.84548		+		+	+
FAM135A	2.83817				+	+
SLC31A2	2.82972				+	+	+
IGLV6-57	2.8268
HLA-B	2.82378				+	+
EPB41L3	2.81921				+	+
IL8	2.79911					+
IGHM	2.78504
COTL1	2.78235				+	+
MGAT4A	2.77476					+
HTR2B	2.77087					+
BTBD7	2.76999				+	+
CD68	2.76679					+
TLR2	2.76675		+			+		+
SAP30L	2.76519			+	+	+
SLAMF7	2.75758				+	+
TLR7	2.75335
GZMK	2.75251			+		+
CTSD	2.75194				+
MLLT1	2.74144			+		+
IFI27	2.73817				+	+
MARCH1	2.73611		+		+	+
SGK1	2.7359				+	+
C5AR1	2.72468					+
GIMAP4	2.72273					+
ATP1B1	2.70385					+
PLEK	2.70228				+	+
CSTB	2.70164
TEF	2.70119				+	+
FCN1	2.69562	+			+
CYTIP	2.6834					+
DAB2	2.66652		+
CCL19	2.66525	+	+	+	+	+
CD48	2.6645				+
CYBA	2.66018				+
DAPP1	2.6557		+		+	+
IGLV3-19	2.65486
PLIN2	2.64156				+	+
ST14	2.63853				+	+
GIMAP6	2.63657				+	+
CXCR2	2.62515				+	+
CA2	2.62443				+	+
RASGRP1	2.62351	+			+	+
RALA	2.60739	+			+	+
CSF2RB	2.58622				+	+
ALOX5AP	2.57944				+	+
ATP6V1F	2.57898	+			+
GALNT6	2.57314			+	+	+
BIN2	2.56975				+	+
SEPP1	2.54483				+	+
FYB	2.53857		+		+	+
RAC2	2.53283				+	+
GZMA	2.53249		+			+
GREM1	2.52033	+		+
CTSC	2.51663				+	+
IL18	2.51327	+	+		+	+
FABP4	2.50476				+	+
CCNK	2.49563					+
OSM	2.49102	+			+
MAP3K1	2.47117		+			+
PLAUR	2.46922
NPC2	2.4682				+	+
CHST11	2.46782		+		+	+
PPBP	2.46562		+		+	+
CCRL2	2.46499		+	+	+	+
MFSD6	2.46007				+	+
RRM2	2.45163					+
FKBP5	2.44837	+	+	+	+	+
PAK1	2.44701		+		+	+
CD84	2.42513		+		+	+
PTPLAD1	2.42442				+	+
NRIP1	2.4204				+	+
TREM2	2.41846					+
IL7R	2.41675				+	+
GZMH	2.41672			+		+
KMO	2.41518					+
XIAP	2.41102				+	+
CHST2	2.39707				+	+
CSF1R	2.39523			+	+	+
MARCO	2.39452				+
GZMB	2.39078					+
COLEC12	2.38925				+	+
ATP8B4	2.37938				+	+
TRAF3IP3	2.37882			+	+	+
GPNMB	2.37833				+	+
RASSF4	2.37371				+	+
FCER1A	2.37099		+		+	+
MREG	2.36857						+
ARAP2	2.36468				+	+
CD2	2.35803		+		+	+
CR1	2.34727				+	+
DNAJC3	2.34499				+	+
MYO5A	2.34215			+	+	+
ADAP2	2.33924				+
FGR	2.33561				+	+
GPR116	2.329	+		+	+	+
TBXAS1	2.3256				+	+
CX3CR1	2.32489		+		+	+
VNN2	2.32055					+
PAN3	2.31433			+	+	+
ALOX5	2.31257				+	+
PLCG2	2.30845		+	+	+	+
CFD	2.30773		+
NCF4	2.30696		+		+	+
TYMP	2.30621				+
SYTL2	2.30444				+	+
IGLV1-40	2.30071
VAV1	2.2958				+	+
LY86	2.29159		+			+
IGLV3-25	2.29147
LST1	2.28551				+	+
SOAT1	2.28431				+	+
NR1H3	2.28364	+			+	+
MAN2B1	2.27922				+
HK2	2.2774		+		+	+
TBC1D2	2.27728				+	+
SLC39A9	2.2745		+		+	+
AKR1C3	2.26229					+
UGCG	2.26044			+	+	+
MAFB	2.26023					+
SLA	2.25019		+		+	+
FOLR2	2.24871					+
ARHGEF3	2.24019		+		+	+
SOD2	2.23652					+
TLR4	2.22962		+			+
FCGR3B	2.2268					+
FXYD5	2.22526					+
CORO1A	2.21021				+
FUCA1	2.21015			+	+	+
CCL7	2.20536					+	+	+	+
DOCK4	2.19784					+
CXorf21	2.19655
CLIC2	2.18944	+			+
EMR2	2.18765				+	+
ARHGDIB	2.18584				+	+
IL1RN	2.18502				+	+
MYO1F	2.17873				+
IL13RA2	2.17776					+
HN1	2.17206			+	+
MGAT4B	2.16827				+	+
GRN	2.16521				+	+
SULT1A1	2.16501				+	+
AQP9	2.13516					+
ARRB2	2.13096	+			+	+
SCARB1	2.1253				+	+
TNFRSF1B	2.11842				+	+
RNASE2	2.11427				+	+
MAPK13	2.10352				+	+
ALDH1A3	2.10054				+	+
CBX4	2.08286					+
AOAH	2.07967	+			+	+
PECAM1	2.07655					+
S1PR1	2.07335				+	+
CLIP4	2.07213				+	+
MXD1	2.06639
LILRB5	2.06532				+
LY75	2.06504
DPP4	2.06031		+	+	+	+
MARCKS	2.0599					+
OSBPL3	2.05121				+	+
SLC31A1	2.04787				+
STAB1	2.03218				+	+
PROCR	2.0306					+
FAIM3	2.02461				+	+
APOBEC3G	2.02411				+	+
EMCN	2.02332		+			+
SAT1	2.02024				+	+
STK4	2.0188		+		+	+
CTSL1	2.01391					+
SULT1C2	2.00994					+
MFSD1	2.00801					+
SRD5A3	2.00581
SLC38A6	2.00388
CCR7	2.00286				+	+
QSER1	1.99665				+	+
AMPD3	1.99625				+	+
PLAT	1.99304			+	+	+
LAIR1	1.99051				+
SASH3	1.99033
PDPN	1.9873				+
GCHFR	1.98449			+	+	+
GPR183	1.9837
RFX1	1.98356					+
CTSK	1.98255				+	+
SIGLEC1	1.97923				+
STK17B	1.97775					+
DSC2	1.97426		+		+	+
MLL2	1.97273
MSR1	1.97236				+	+
LAMB1	1.97218		+		+	+
ITK	1.97187				+	+
CD83	1.9668				+	+			+
CEBPA	1.96026
SCG2	1.95842				+	+
IFNAR2	1.95778						+
DNAJC1	1.95391				+	+
C12orf5	1.95269					+
SLC7A7	1.95238				+	+
HS3ST3A1	1.9495
C17orf60	1.94748
GUSB	1.9456				+	+
FAM49B	1.94045				+	+
LYPLA1	1.9401					+
LPAR6	1.93777				+
ADAM28	1.93499				+	+
SPI1	1.93211				+	+
OAS3	1.93031		+	+	+	+
RASSF2	1.92738	+			+	+
ARPC1B	1.92595		+
PLEKHH3	1.92545				+
FCGBP	1.92419			+	+	+
GRB2	1.92353					+
RBBP9	1.92104					+
SMG1	1.91754	+	+		+	+
IREB2	1.91622					+
PGD	1.91547					+
SLCO4A1	1.91371		+	+	+	+
PPP1R16B	1.91191
ACSL5	1.91118		+	+	+	+
FPR1	1.91096					+
MX1	1.90842	+		+	+	+	+	+	+
HK3	1.90762			+	+	+
SELE	1.90215				+	+			+
IFI44L	1.8977				+	+
SCO2	1.88896
NPC1	1.88703		+	+	+	+
TCN2	1.88032					+
C2	1.86933						+	+	+
IL2RG	1.86251	+	+			+
TXNIP	1.85868		+	+	+	+
NTM	1.85761				+	+
PTGER2	1.85206				+	+
CCL4	1.84885				+	+
PLAU	1.84848				+	+			+
HEXB	1.84842				+	+
PTGS1	1.84224		+		+	+
LILRB3	1.84064
CYP1B1	1.83897	+
GPR171	1.83538				+	+
GCH1	1.8295				+
LMO2	1.82944				+	+	+
PSMB8	1.82878				+	+	+	+
TNFRSF11B	1.82691				+	+
KRT17	1.82544
SLC2A3	1.8232					+
KCTD12	1.82127				+	+
S100A10	1.81959		+		+	+
TMOD2	1.81799				+	+
SLC7A2	1.81622	+				+	+
RBM47	1.81261				+	+
RAB11FIP1	1.80815					+
C13orf18	1.80784
PRKCH	1.80681				+	+
PLVAP	1.80195
RGS10	1.80185		+		+	+
MAP3K2	1.80185		+			+
BIRC3	1.80095			+	+	+
PSMB10	1.79739						+	+
SEL1L3	1.7954				+	+
BTN3A2	1.79535				+	+
BLNK	1.78897				+	+
CD28	1.78778	+			+	+
TPST2	1.78512			+	+	+
APOC2	1.78402
TANC2	1.77587				+	+
IKZF1	1.77396				+	+
TMEM48	1.77203				+	+
POU2AF1	1.77069				+	+
BCL2L11	1.76733				+	+
SCARF1	1.7664		+		+	+
IL1B	1.76388			+		+
TIAM1	1.7637				+	+
LRMP	1.76102		+			+
ITGA4	1.7553					+
IGFBP1	1.75304					+
CLEC10A	1.75221	+				+
NRP2	1.74199					+
CD1D	1.74069					+
DEM1	1.74014					+
PLXDC1	1.73988				+	+
THBS2	1.73614				+	+
C8orf4	1.73347					+
DDIT4	1.72906				+
NRIP3	1.7251
IL1R2	1.72454				+	+
RAD51AP1	1.72398				+	+
IL1F7	1.72211		+
ARHGAP25	1.72059				+	+
GLA	1.71211				+	+
TMEM176A	1.70949				+
COL1A1	1.70946				+
SAMD9	1.7094		+		+	+
SLC12A8	1.7053
FLVCR2	1.69937	+		+
CKLF	1.69661
RABEP1	1.69656			+	+	+
CXCL10	1.69105		+	+	+		+	+	+
AP4E1	1.69088				+	+
FLT1	1.68776	+			+	+
SELL	1.68496					+
PLXNC1	1.67872		+		+	+
AIM1	1.6779			+	+	+
CSK	1.6737				+
SELPLG	1.67266				+	+
CXCL3	1.66857			+	+	+
CNIH4	1.66719				+	+
ABL2	1.66435		+			+
ICAM3	1.65636	+			+	+
CRTAM	1.65216					+
PHLDA2	1.65023					+
TALDO1	1.64882				+
CPA3	1.64534				+	+
PACS1	1.6433				+	+
PODXL	1.6369				+
ADM	1.63381				+	+
FAM134B	1.6326		+		+	+
PSTPIP1	1.63209				+
LHFPL2	1.6312				+	+
CYP27B1	1.63064			+
PRKX	1.6289		+		+
CD8A	1.62883				+	+
PGBD5	1.62324				+	+
APOL3	1.61625				+	+
ZMIZ1	1.61562				+	+
BTN3A3	1.61468				+	+
ZNF217	1.6145			+	+	+
MAB21L2	1.61314			+	+	+
PSMB9	1.61196				+	+	+	+	+
CCNB2	1.61131				+	+
CXCL1	1.61081				+	+
SLC1A3	1.6104	+	+		+	+
MXRA5	1.60485				+
SLC22A18	1.60379				+	+
PLA2G15	1.60161				+	+
TRAC	1.59801
SLC11A1	1.59641		+		+	+
RNASEH2A	1.59426				+	+
LGALS9	1.59129				+	+		+
HHEX	1.57851					+
CD33	1.57807	+	+		+	+
P2RY13	1.57461
CFH	1.57116				+	+
ITGAL	1.57107		+		+	+
P2RX4	1.56827	+	+	+		+
ATP6V1A	1.56581					+
SEMA3G	1.56356				+
CD72	1.56243				+	+
MAF	1.55364		+		+	+
SDS	1.54717					+
PTPRE	1.54422			+	+	+
FMO3	1.54237					+
NCKAP1L	1.54216		+	+	+	+
SEC14L1	1.54106
CNIH3	1.53894		+	+	+	+
CA12	1.53805				+	+
APOBEC3B	1.53786
ADRB2	1.53644
LYL1	1.53339
DOK2	1.53259					+
LAMP3	1.53035	+			+	+
SLC29A3	1.52956					+
PDGFRA	1.5287				+	+
LAT2	1.52721				+
ISG15	1.5247				+
TMSB10	1.52256	+			+	+
ANXA2	1.52005				+	+
SLCO2A1	1.51076				+	+
TLR5	1.51045				+	+
IRAK3	1.50402					+
CD80	1.50158				+	+
CD96	1.4985				+	+
PAQR5	1.49607	+			+	+
MRPS15	1.48781					+
CDH5	1.48475				+	+
SIRPA	1.48441				+	+
FRAT2	1.47894					+
THBS1	1.47889				+	+
CPPED1	1.47797				+	+
HPGDS	1.47677					+
CXCL12	1.4746		+		+	+
ARHGAP15	1.47351				+	+
TM6SF1	1.47249	+			+	+
SNX24	1.47172				+	+
RUNX3	1.47108				+	+
RPS6KA1	1.47023			+	+	+
ADRBK2	1.4694				+
ESM1	1.4674					+
SGK269	1.46376			+
C19orf28	1.46331
CSF3R	1.45964				+	+
CYBRD1	1.45863				+	+
RPP25	1.45367			+	+
ACE	1.45149				+	+
PPIF	1.45062				+	+
IL2RB	1.44657	+			+	+
BCAP31	1.44293					+
CBLL1	1.44114				+	+
NMI	1.43793				+	+
HPGD	1.43556				+	+
PLSCR1	1.43517					+
KRT16	1.43439
NCAPG	1.4333				+	+
NFE2L3	1.43303				+	+
PNP	1.42497				+	+	+	+
IFI44	1.42262		+
CLDN1	1.41611
CYBB	1.41402		+		+	+
RHBDF2	1.41398				+	+
PTX3	1.41201		+	+		+		+
FCGRT	1.40779			+	+	+
HIST1H2AK	1.40734
CXCL2	1.40647				+
ATP6V1B2	1.40615					+
APOBEC3C	1.40482				+	+
CCDC109B	1.40186					+
GMIP	1.39962
RAD21	1.39694					+
PPARG	1.39636		+		+	+
POLH	1.39142				+	+
VCAN	1.3904		+	+	+	+
PDPR	1.38944				+	+
KDELR3	1.38798				+
TDO2	1.38672				+	+
ORAI2	1.38628				+
LOC151162	1.38604
JAKMIP2	1.38412				+	+
IFI16	1.38207				+	+
CASP4	1.3818				+	+
LGALS2	1.37901
GIT2	1.376				+	+
HLA-E	1.37576		+			+
FAM38A	1.37572
TFRC	1.37504		+	+		+
RAP2A	1.37287				+	+
BATF	1.37056				+
NTN1	1.36985					+
PTAFR	1.36861				+	+
TIMP1	1.36815
DRAM1	1.36532				+
CLIC1	1.35878
EGR2	1.3534		+	+		+	+
C1R	1.35292				+	+
NDC80	1.35049		+			+
CD4	1.34535				+	+
SERPINE1	1.34312				+	+
PPFIBP2	1.33731	+			+	+
MYD88	1.3351				+	+	+	+
ZSCAN5A	1.33185				+	+
CD69	1.33137	+	+	+			+
LSP1	1.32933				+	+
SLC15A3	1.32915				+	+	+		+
RNF130	1.32776	+			+	+
GAS7	1.32449		+	+	+	+
UBD	1.32337						+	+
SDCBP	1.31798		+			+
OLR1	1.31589		+			+
LAP3	1.31174		+		+	+
KLRB1	1.31114				+	+
IGF1	1.31043	+	+		+	+
EMP1	1.31001					+
IGHV1-2	1.30797
FOXN2	1.30652					+
HSPE1	1.3062
CLDN5	1.303		+	+	+	+
CIR1	1.29826				+	+
COL11A1	1.29499				+	+
KRT7	1.29229				+	+
MYST3	1.29156
C14orf106	1.29105
KLRF1	1.28799
IL12RB1	1.28399		+		+	+
LPXN	1.28211				+	+
HMGA1	1.28196		+		+
M6PR	1.28045				+	+
EPB41	1.27584		+	+	+	+
EVL	1.272		+		+	+
HMHA1	1.27155	+			+	+
GATC	1.27059
NYX	1.27023					+
TNS3	1.26887	+	+		+	+
TM7SF4	1.26744
PSAP	1.26681					+
NOP10	1.26622
ST8SIA1	1.26595				+	+
SLC2A5	1.26524				+	+
FKBP11	1.26158
MMP2	1.26147				+	+
DPP3	1.26038
ELL2	1.25912			+		+
EZH2	1.25391				+	+
CDKN2A	1.25038				+	+
BMPR1B	1.24957		+		+	+
ECM1	1.24902				+	+
TGFBR1	1.24766				+	+
COMMD9	1.24711
MIF	1.24636
IFITM1	1.24349					+
CYP2C19	1.24087
PCOLCE	1.24059				+
LGALS8	1.23973				+	+
ASAP1	1.23867				+	+
SLC2A6	1.23793				+	+	+	+	+
BCL11B	1.23735					+
SH2B3	1.23498				+	+
OSTF1	1.23165				+	+
CFHR2	1.23144				+	+
P2RX7	1.23103				+	+
MRAS	1.2305		+		+	+
DCK	1.22821		+
TSPAN15	1.22809			+	+
HS3ST1	1.2255				+	+
ICAM1	1.22392		+		+	+	+	+	+
MPP1	1.22342				+	+
DGKZ	1.22318				+	+
ZNF516	1.22306		+		+	+
HPSE	1.22291		+
ATP6AP1	1.22099				+	+
DOPEY2	1.22059
EAF2	1.21831				+	+
OXTR	1.21813				+	+
CCL13	1.21596	+			+	+
CREG1	1.21554	+			+	+
FAP	1.21251				+	+
QPCT	1.21188	+			+	+
MX2	1.21107				+	+
AKR1A1	1.20946					+
FZD2	1.20827		+
TLR8	1.20712				+	+
OGFRL1	1.20619			+		+
HCP5	1.20291
ACP2	1.19846
EDEM2	1.19842	+		+
MICB	1.1968				+	+
APLNR	1.19629				+
RAB31	1.1915				+	+
TNFAIP3	1.19098					+	+		+
SECTM1	1.19086		+		+	+	+	+
ROBLD3	1.18533
PRCP	1.18359		+			+
CD93	1.18173				+	+
NANS	1.17963					+
JAK3	1.17867			+	+
FGD6	1.17658				+	+
DSE	1.17633				+	+
CD180	1.17615			+	+	+
IL10	1.175					+
PRRX1	1.17383					+
LCK	1.17254				+	+	+
HSPC159	1.17035
PARP12	1.16966				+	+	+	+
MAPKAPK3	1.16948	+			+	+
PLEKHO2	1.16721
MMD	1.16641	+			+	+
CAMK1D	1.16503				+	+
AKR1C2	1.16501					+
DDX6	1.16405					+
TGFB1	1.16298					+
ECT2	1.16196		+		+	+
CLEC4A	1.16111
SPINK1	1.15996					+
MGC29506	1.15934
CACNA2D3	1.15681				+	+
C1orf113	1.15655
C21orf91	1.15456		+		+	+
CADM1	1.14813				+	+
PLOD1	1.14808		+		+	+
OTUD7B	1.14662				+	+
C21orf96	1.14613
RNF13	1.14389		+		+	+
VEGFC	1.14362	+				+		+
DNASE1L3	1.14136		+		+	+
KIAA1310	1.13993
PKM2	1.1373
CD55	1.13501					+
CXCL9	1.13234		+	+			+	+	+
PPT1	1.12993				+	+
SERPINF1	1.12794		+		+	+
ELMO1	1.12535				+	+
MMP8	1.12497				+	+
HP1BP3	1.1249				+	+
ZWILCH	1.12416				+	+
ASAP1IT1	1.12376
CALML4	1.12306				+	+
ATOX1	1.12294				+	+
NUPR1	1.1181					+
AKR1B1	1.11633				+	+
LTC4S	1.11605
DSP	1.11581	+			+	+
XRCC4	1.11422					+
ISG20	1.11032					+	+
GAL3ST4	1.10775		+
DBC1	1.10672				+	+
PCK2	1.10437
MFNG	1.10193				+
STEAP1	1.09606					+
PTPN22	1.09582		+			+
CBFA2T3	1.09415				+	+
BASP1	1.09211
OLFML2B	1.09103					+
BLVRB	1.09026					+
DDX58	1.09023		+		+	+	+	+
CXCR6	1.08968	+		+		+
RPA3	1.08609					+
SIPA1	1.08423					+
FZD8	1.08279
GLB1	1.08198
PION	1.08075				+	+
SERPINB1	1.08067	+	+	+	+	+
DTYMK	1.0806					+
CDK1	1.07678					+
DUSP4	1.07537		+	+	+	+
ST3GAL6	1.0733				+	+
PYGL	1.07326				+	+
GNPDA1	1.07253				+	+
ROBO4	1.07011				+	+
TMEM140	1.07001		+			+	+	+
C7orf10	1.06993				+	+
IGFBP3	1.06837				+	+
DUSP6	1.06801				+
CLIC3	1.06783				+
POPDC2	1.06474
LILRA2	1.06394				+
GDF15	1.05938
FRAT1	1.05902
STK10	1.05889				+	+
HAPLN1	1.05832				+	+
ADCY7	1.05764				+	+
PCDH12	1.05517				+	+
RABL5	1.05397					+
F2R	1.0532
FMNL1	1.05301				+
ATP1A1	1.05246		+	+	+	+
S100A12	1.05189
ZNF267	1.05108		+		+	+
SPINT2	1.04663	+			+	+
ANXA2P3	1.0457					+
GAA	1.04557				+	+
NKG7	1.04419	+		+	+
LGALS3	1.0424				+	+
SERINC5	1.04238				+	+
BTK	1.04122			+	+	+
MME	1.04114				+	+
DNMT1	1.04043				+
LILRA3	1.0397	+
ITGB7	1.03746				+	+
TPP1	1.03693	+				+
IVNS1ABP	1.03326		+		+	+
TMEM158	1.03078				+	+
SLC47A1	1.03056		+			+
PF4	1.03041		+
FAM49A	1.02842				+	+
ICAM2	1.02788		+		+	+
ALCAM	1.02696				+	+
CFP	1.02574		+		+	+
RPS21	1.02573	+	+
CDA	1.0255
IFIT3	1.02498		+		+	+	+	+	+
SLC39A8	1.02433		+		+	+
RTP4	1.0237				+	+	+	+	+
RUVBL1	1.02314				+	+
DERL2	1.02147				+	+
AP1S2	1.02015				+	+
RP2	1.01949			+	+	+
SLC43A3	1.01921		+
KIAA1598	1.01902				+	+
GMPPB	1.01859	+		+
STXBP2	1.01825				+
C10orf28	1.01696
SPIN1	1.0169	+			+	+
CAMTA1	1.01423	+			+	+
CCR2	1.01317				+
HIF1A	1.01214	+	+			+
P2RY6	1.01213		+		+	+
GOLM1	1.01043	+		+
SIRPG	1.00825		+		+	+
COQ2	1.00743		+			+
WAS	1.00688				+	+
NR1D2	1.00222					+
DFNA5	1.00207				+	+
SPAG5	1.00055
TRIM14	1.00024		+			+

## Sheet: GO_carotid
Table S4. Gene ontology terms enriched in the coronary plaques.
GOID	Ontology	Term	Level	symbols	p
GO:0002376	biological_process	immune system process	1	SPP1 // CCL18 // S100A8 // MMP9 // IGJ // IFI30 // S100A9 // IGKC // C1QB // CTSS // CD36 // TYROBP // ADAMDEC1 // CCL5 // CCL5 // HLA-DRA // HLA-DRA // HLA-DRA // HLA-DRA // CD14 // HLA-DQB1 // HLA-DQB1 // HLA-DQB1 // HLA-DQB1 // HLA-DQB1 // HLA-DQB1 // HLA-DQB1 // HLA-DQB1 // HLA-DQB1 // HLA-DQB1 // HLA-DQB1 // HLA-DQB1 // GPR65 // TREM1 // HCK // HLA-DMB // HLA-DMB // HLA-DMB // CXCR4 // LCP2 …	3.67694e-134
GO:0006955	biological_process	immune response	2	CCL18 // S100A8 // IGJ // IFI30 // S100A9 // IGKC // C1QB // CTSS // CD36 // TYROBP // ADAMDEC1 // CCL5 // CCL5 // HLA-DRA // HLA-DRA // HLA-DRA // HLA-DRA // CD14 // HLA-DQB1 // HLA-DQB1 // HLA-DQB1 // HLA-DQB1 // HLA-DQB1 // HLA-DQB1 // HLA-DQB1 // HLA-DQB1 // HLA-DQB1 // HLA-DQB1 // HLA-DQB1 // HLA-DQB1 // GPR65 // TREM1 // HCK // HLA-DMB // HLA-DMB // HLA-DMB // LCP2 // CTSH // CTSH // RGS1 /…	8.87867e-121
GO:0006952	biological_process	defense response	3	SPP1 // CCL18 // S100A8 // CHI3L1 // IFI30 // S100A9 // IGKC // CD163 // C1QB // ACP5 // ACP5 // ACP5 // CTSS // CD36 // CD36 // CD36 // CD36 // CD36 // CD36 // CD36 // CD36 // LYZ // HMOX1 // TYROBP // CCL5 // HLA-DRA // CD14 // CD14 // CD14 // CD14 // HLA-DQB1 // TREM1 // C3AR1 // HCK // HCK // CXCR4 // LCP2 // MNDA // PTPRC // PTPRC // LY96 // SERPINA1 // HLA-DPA1 // LILRB2 // PYCARD // MMP7 /…	7.05963e-101
GO:0002682	biological_process	regulation of immune system process	3	IGKC // PLA2G7 // C1QB // CTSS // CD36 // CD36 // CD36 // CD36 // CD36 // CD36 // CD36 // CD36 // HMOX1 // HMOX1 // TYROBP // CCL5 // HLA-DRA // CD14 // HLA-DQB1 // SAMSN1 // SAMSN1 // C3AR1 // C3AR1 // HCK // LCP2 // TMEM176B // MNDA // CTSH // PTPRC // PTPRC // PTPRC // PTPRC // PTPRC // PTPRC // PTPRC // PTPRC // LY96 // FCGR2B // HLA-DPA1 // LILRB2 // PYCARD // ITGB2 // ITGAM // VCAM1 // HLA-…	9.15206e-94
GO:0050896	biological_process	response to stimulus	1	SPP1 // MMP12 // CCL18 // S100A8 // CHI3L1 // IGJ // IFI30 // S100A9 // IGKC // CD163 // C1QB // ACP5 // ACP5 // ACP5 // CTSS // CD36 // CD36 // CD36 // CD36 // CD36 // CD36 // CD36 // CD36 // VAMP8 // LYZ // HMOX1 // HMOX1 // TYROBP // ADAMDEC1 // CCL5 // CCL5 // APOE // APOE // APOE // HLA-DRA // HLA-DRA // HLA-DRA // HLA-DRA // CD14 // CD14 // CD14 // CD14 // HLA-DQB1 // HLA-DQB1 // HLA-DQB1 /…	4.33275e-78
GO:0050776	biological_process	regulation of immune response	4	IGKC // C1QB // CTSS // CD36 // CD36 // CD36 // CD36 // CD36 // CD36 // CD36 // CD36 // HMOX1 // HMOX1 // TYROBP // CCL5 // HLA-DRA // CD14 // HLA-DQB1 // SAMSN1 // SAMSN1 // HCK // LCP2 // MNDA // CTSH // PTPRC // PTPRC // PTPRC // PTPRC // PTPRC // PTPRC // PTPRC // PTPRC // LY96 // FCGR2B // HLA-DPA1 // LILRB2 // PYCARD // ITGB2 // ITGAM // VCAM1 // HLA-DRB1 // HLA-DRB1 // HLA-DRB1 // HLA-DRB1…	3.27733e-74
GO:0002684	biological_process	positive regulation of immune system process	4	IGKC // PLA2G7 // C1QB // CTSS // CD36 // CD36 // CD36 // CD36 // CD36 // CD36 // CD36 // CD36 // HMOX1 // HMOX1 // CCL5 // HLA-DRA // CD14 // HLA-DQB1 // C3AR1 // C3AR1 // HCK // LCP2 // MNDA // PTPRC // PTPRC // PTPRC // PTPRC // PTPRC // PTPRC // PTPRC // PTPRC // LY96 // HLA-DPA1 // LILRB2 // PYCARD // ITGB2 // ITGAM // VCAM1 // HLA-DRB1 // HLA-DRB1 // HLA-DRB1 // HLA-DRB1 // HLA-DRB1 // HLA-…	5.04317e-65
GO:0019882	biological_process	antigen processing and presentation	2	IFI30 // CTSS // CD36 // HLA-DRA // HLA-DRA // HLA-DRA // HLA-DRA // HLA-DQB1 // HLA-DQB1 // HLA-DQB1 // HLA-DQB1 // HLA-DQB1 // HLA-DQB1 // HLA-DQB1 // HLA-DQB1 // HLA-DQB1 // HLA-DQB1 // HLA-DQB1 // HLA-DQB1 // HLA-DMB // HLA-DMB // HLA-DMB // CTSH // HLA-DPA1 // HLA-DPA1 // HLA-DRB1 // HLA-DRB1 // HLA-DRB1 // HLA-DRB1 // HLA-DRB1 // HLA-DRB1 // HLA-DRB1 // HLA-DRB1 // HLA-DRB1 // HLA-DRB1 // H…	5.36997e-59
GO:0048583	biological_process	regulation of response to stimulus	3	SPP1 // S100A8 // CHI3L1 // S100A9 // IGKC // PLA2G7 // C1QB // ACP5 // ACP5 // ACP5 // CTSS // CD36 // CD36 // CD36 // CD36 // CD36 // CD36 // CD36 // CD36 // HMOX1 // HMOX1 // TYROBP // CCL5 // APOE // APOE // APOE // HLA-DRA // CD14 // HLA-DQB1 // GPR65 // SAMSN1 // SAMSN1 // C3AR1 // C3AR1 // HCK // STMN3 // STMN3 // CXCR4 // LCP2 // MNDA // CTSH // PTPRC // PTPRC // PTPRC // PTPRC // PTPRC /…	2.03544e-57
GO:0051707	biological_process	response to other organism	3	S100A8 // S100A9 // ACP5 // ACP5 // ACP5 // CD36 // CD36 // CD36 // CD36 // CD36 // CD36 // CD36 // CD36 // LYZ // CCL5 // CD14 // CD14 // CD14 // CD14 // HCK // HCK // CXCR4 // PTPRC // PTPRC // LY96 // LILRB2 // PYCARD // CHIT1 // MMP7 // HLA-DRB1 // HLA-DRB1 // HLA-DRB1 // HLA-DRB1 // HLA-DRB1 // CCR5 // ITGAX // NCF2 // NCF2 // NCF2 // ABCA1 // CCL2 // SYK // FCER1G // CCL8 // IRF8 // IRF8 //…	6.64491e-57
GO:0009607	biological_process	response to biotic stimulus	2	CCL18 // S100A8 // S100A9 // ACP5 // ACP5 // ACP5 // CD36 // CD36 // CD36 // CD36 // CD36 // CD36 // CD36 // CD36 // LYZ // CCL5 // CD14 // CD14 // CD14 // CD14 // HCK // HCK // CXCR4 // PTPRC // PTPRC // LY96 // LILRB2 // PYCARD // CHIT1 // MMP7 // HLA-DRB1 // HLA-DRB1 // HLA-DRB1 // HLA-DRB1 // HLA-DRB1 // CCR5 // ITGAX // NCF2 // NCF2 // NCF2 // ABCA1 // CCL2 // SYK // FCER1G // CCL8 // IRF8 /…	4.45198e-56
GO:0006950	biological_process	response to stress	2	SPP1 // MMP12 // CCL18 // S100A8 // CHI3L1 // IFI30 // S100A9 // IGKC // CD163 // C1QB // ACP5 // ACP5 // ACP5 // CTSS // CD36 // CD36 // CD36 // CD36 // CD36 // CD36 // CD36 // CD36 // VAMP8 // LYZ // HMOX1 // HMOX1 // TYROBP // CCL5 // APOE // APOE // APOE // HLA-DRA // CD14 // CD14 // CD14 // CD14 // HLA-DQB1 // TREM1 // C3AR1 // GNA13 // GNA13 // HBB // HCK // HCK // CXCR4 // LCP2 // MNDA // …	7.48853e-55
GO:0042221	biological_process	response to chemical stimulus	2	SPP1 // CCL18 // S100A8 // CHI3L1 // IFI30 // S100A9 // ACP5 // ACP5 // ACP5 // CTSS // CD36 // CD36 // CD36 // CD36 // CD36 // CD36 // CD36 // CD36 // HMOX1 // HMOX1 // TYROBP // CCL5 // APOE // APOE // APOE // HLA-DRA // CD14 // CD14 // CD14 // CD14 // HLA-DQB1 // C3AR1 // C3AR1 // HBB // HCK // LPL // LPL // LPL // LPL // CXCR4 // CTSH // CTSH // PTPRC // LY96 // HLA-DPA1 // LILRB2 // PYCARD /…	1.89669e-54
GO:0070887	biological_process	cellular response to chemical stimulus	4	SPP1 // S100A8 // CHI3L1 // IFI30 // S100A9 // CTSS // CD36 // CD36 // CD36 // CD36 // CD36 // CD36 // CD36 // CD36 // HMOX1 // HMOX1 // CCL5 // APOE // APOE // APOE // HLA-DRA // CD14 // HLA-DQB1 // HBB // HCK // CXCR4 // CTSH // CTSH // LY96 // HLA-DPA1 // LILRB2 // PYCARD // ITGB2 // ITGAM // VCAM1 // HLA-DRB1 // HLA-DRB1 // HLA-DRB1 // HLA-DRB1 // HLA-DRB1 // HLA-DRB1 // HLA-DRB1 // HLA-DRB1 …	4.54769e-51
GO:0006954	biological_process	inflammatory response	4	SPP1 // CCL18 // S100A8 // CHI3L1 // S100A9 // CD163 // LYZ // HMOX1 // CCL5 // CD14 // CD14 // CD14 // CD14 // C3AR1 // HCK // CXCR4 // LY96 // SERPINA1 // PYCARD // ITGB2 // VCAM1 // HLA-DRB1 // HLA-DRB1 // HLA-DRB1 // HLA-DRB1 // HLA-DRB1 // CCR5 // CCL2 // CCR1 // LIPA // LIPA // LIPA // SYK // FCER1G // CCL8 // LYN // LYN // VNN1 // TLR1 // TLR1 // TLR1 // AIF1 // IL8 // IL8 // TLR2 // TLR7 …	5.84929e-50
GO:0045087	biological_process	innate immune response	4	S100A8 // IFI30 // S100A9 // IGKC // C1QB // CTSS // CD36 // TYROBP // CCL5 // HLA-DRA // CD14 // HLA-DQB1 // TREM1 // HCK // LCP2 // LY96 // HLA-DPA1 // PYCARD // ITGB2 // ITGAM // VCAM1 // HLA-DRB1 // HLA-DRB1 // HLA-DRB1 // HLA-DRB1 // HLA-DRB1 // HLA-DRB1 // HLA-DRB1 // HLA-DRB1 // HLA-DRB1 // HLA-DRB1 // HLA-DRB1 // HLA-DRB1 // HLA-DRB1 // CTSB // C1QA // NCF2 // CCL2 // VSIG4 // PTPN6 // PT…	2.42567e-48
GO:0051704	biological_process	multi-organism process	1	SPP1 // S100A8 // MMP9 // S100A9 // ACP5 // ACP5 // ACP5 // CD36 // CD36 // CD36 // CD36 // CD36 // CD36 // CD36 // CD36 // LYZ // CCL5 // CD14 // CD14 // CD14 // CD14 // HCK // HCK // CXCR4 // PTPRC // PTPRC // MMP1 // ANPEP // LY96 // FCGR2B // LILRB2 // PYCARD // CHIT1 // MMP7 // VCAM1 // HLA-DRB1 // HLA-DRB1 // HLA-DRB1 // HLA-DRB1 // HLA-DRB1 // DOCK2 // CCR5 // ITGAX // NCF2 // NCF2 // NCF2…	3.07443e-48
GO:0009611	biological_process	response to wounding	3	SPP1 // MMP12 // CCL18 // S100A8 // CHI3L1 // S100A9 // CD163 // CD36 // LYZ // HMOX1 // CCL5 // APOE // APOE // APOE // CD14 // CD14 // CD14 // CD14 // TREM1 // C3AR1 // GNA13 // GNA13 // HBB // HCK // CXCR4 // LCP2 // APBB1IP // MMP1 // LY96 // SERPINA1 // PYCARD // ITGB2 // ITGAM // VCAM1 // HLA-DRB1 // HLA-DRB1 // HLA-DRB1 // HLA-DRB1 // HLA-DRB1 // CCR5 // ITGAX // CCL2 // CCR1 // PTPN6 // P…	3.59866e-47
GO:0050865	biological_process	regulation of cell activation	4	HMOX1 // HMOX1 // CCL5 // APOE // HLA-DRA // HLA-DQB1 // SAMSN1 // SAMSN1 // MNDA // PTPRC // PTPRC // HLA-DPA1 // LILRB2 // PYCARD // VCAM1 // HLA-DRB1 // HLA-DRB1 // HLA-DRB1 // HLA-DRB1 // HLA-DRB1 // HLA-DRB1 // HLA-DRB1 // HLA-DRB1 // HLA-DRB1 // HLA-DRB1 // HLA-DRB1 // HLA-DRB1 // HLA-DRB1 // CCL2 // VSIG4 // PTPN6 // PTPN6 // PTPN6 // PTPRJ // SYK // HLA-DMA // HLA-DMA // FCER1G // HLA-DQA…	1.97149e-46
GO:0051716	biological_process	cellular response to stimulus	3	SPP1 // CCL18 // S100A8 // CHI3L1 // IFI30 // S100A9 // IGKC // CTSS // CD36 // CD36 // CD36 // CD36 // CD36 // CD36 // CD36 // CD36 // VAMP8 // HMOX1 // HMOX1 // TYROBP // CCL5 // APOE // APOE // APOE // HLA-DRA // CD14 // HLA-DQB1 // GPR65 // TREM1 // C3AR1 // GNA13 // GNA13 // HBB // HCK // LPL // CXCR4 // LCP2 // MNDA // CTSH // CTSH // APBB1IP // PTPRC // PTPRC // PTPRC // PTPRC // PTPRC // …	6.41789e-46
GO:0048584	biological_process	positive regulation of response to stimulus	4	S100A8 // CHI3L1 // S100A9 // IGKC // PLA2G7 // C1QB // CTSS // CD36 // CD36 // CD36 // CD36 // CD36 // CD36 // CD36 // CD36 // HMOX1 // CCL5 // HLA-DRA // CD14 // HLA-DQB1 // C3AR1 // C3AR1 // HCK // CXCR4 // LCP2 // MNDA // PTPRC // PTPRC // PTPRC // PTPRC // PTPRC // PTPRC // PTPRC // PTPRC // LY96 // HLA-DPA1 // PYCARD // ITGB2 // ITGAM // HLA-DRB1 // HLA-DRB1 // HLA-DRB1 // HLA-DRB1 // HLA-D…	1.32147e-44
GO:0002694	biological_process	regulation of leukocyte activation	5	HMOX1 // HMOX1 // CCL5 // HLA-DRA // HLA-DQB1 // SAMSN1 // SAMSN1 // MNDA // PTPRC // PTPRC // HLA-DPA1 // LILRB2 // PYCARD // VCAM1 // HLA-DRB1 // HLA-DRB1 // HLA-DRB1 // HLA-DRB1 // HLA-DRB1 // HLA-DRB1 // HLA-DRB1 // HLA-DRB1 // HLA-DRB1 // HLA-DRB1 // HLA-DRB1 // HLA-DRB1 // HLA-DRB1 // CCL2 // VSIG4 // PTPN6 // PTPN6 // PTPN6 // SYK // HLA-DMA // HLA-DMA // FCER1G // HLA-DQA1 // CD3D // LYN …	1.75285e-44
GO:0032101	biological_process	regulation of response to external stimulus	4	SPP1 // S100A8 // S100A9 // PLA2G7 // ACP5 // ACP5 // ACP5 // CD36 // CD36 // CD36 // CD36 // CD36 // CD36 // CD36 // CD36 // CCL5 // APOE // APOE // APOE // C3AR1 // C3AR1 // HCK // CXCR4 // HLA-DRB1 // CCL2 // CCR1 // PTPRJ // SYK // FCER1G // LYN // LYN // AIF1 // IL8 // IL8 // TLR2 // TLR7 // PLEK // CCL19 // ALOX5AP // GREM1 // IL18 // FABP4 // OSM // PLAUR // XIAP // FCER1A // CR1 // NR1H3 …	3.0836e-44
GO:0034341	biological_process	response to interferon-gamma	5	IFI30 // CCL5 // HLA-DRA // HLA-DQB1 // HCK // HLA-DPA1 // VCAM1 // HLA-DRB1 // HLA-DRB1 // HLA-DRB1 // HLA-DRB1 // HLA-DRB1 // HLA-DRB1 // HLA-DRB1 // HLA-DRB1 // HLA-DRB1 // HLA-DRB1 // HLA-DRB1 // HLA-DRB1 // HLA-DRB1 // CCL2 // PTPN6 // KYNU // IRF8 // HLA-DQA1 // HLA-DPB1 // AIF1 // OAS1 // HLA-B // HLA-B // HLA-B // HLA-B // HLA-B // HLA-B // HLA-B // HLA-B // HLA-B // HLA-B // HLA-B // HLA…	6.7107e-43
GO:0080134	biological_process	regulation of response to stress	4	SPP1 // S100A8 // S100A9 // PLA2G7 // ACP5 // ACP5 // ACP5 // CTSS // CD36 // CD36 // CD36 // CD36 // CD36 // CD36 // CD36 // CD36 // CCL5 // APOE // APOE // APOE // CD14 // HCK // LY96 // PYCARD // ITGB2 // ITGAM // HLA-DRB1 // DOCK2 // CTSB // PTPN6 // PTPRJ // SYK // LGMN // FCER1G // LYN // LYN // CD86 // CD86 // TLR1 // TLR1 // TLR1 // TLR2 // TLR7 // PLEK // DAB2 // DAB2 // DAB2 // DAB2 // …	2.36977e-42
GO:0071346	biological_process	cellular response to interferon-gamma	7	IFI30 // CCL5 // HLA-DRA // HLA-DQB1 // HCK // HLA-DPA1 // VCAM1 // HLA-DRB1 // HLA-DRB1 // HLA-DRB1 // HLA-DRB1 // HLA-DRB1 // HLA-DRB1 // HLA-DRB1 // HLA-DRB1 // HLA-DRB1 // HLA-DRB1 // HLA-DRB1 // HLA-DRB1 // HLA-DRB1 // CCL2 // PTPN6 // IRF8 // HLA-DQA1 // HLA-DPB1 // AIF1 // OAS1 // HLA-B // HLA-B // HLA-B // HLA-B // HLA-B // HLA-B // HLA-B // HLA-B // HLA-B // HLA-B // HLA-B // HLA-B // HL…	7.36033e-42
GO:0009617	biological_process	response to bacterium	4	S100A8 // S100A9 // ACP5 // ACP5 // ACP5 // CD36 // CD36 // CD36 // CD36 // CD36 // CD36 // CD36 // CD36 // LYZ // CCL5 // CD14 // CD14 // CD14 // CD14 // HCK // HCK // LY96 // LILRB2 // PYCARD // CHIT1 // MMP7 // HLA-DRB1 // HLA-DRB1 // HLA-DRB1 // HLA-DRB1 // HLA-DRB1 // CCR5 // NCF2 // NCF2 // NCF2 // ABCA1 // CCL2 // SYK // FCER1G // IRF8 // IRF8 // IRF8 // IRF8 // IRF8 // IRF8 // LYN // LYN …	1.54617e-41
GO:0060333	biological_process	interferon-gamma-mediated signaling pathway	8	IFI30 // HLA-DRA // HLA-DQB1 // HCK // HLA-DPA1 // VCAM1 // HLA-DRB1 // HLA-DRB1 // HLA-DRB1 // HLA-DRB1 // HLA-DRB1 // HLA-DRB1 // HLA-DRB1 // HLA-DRB1 // HLA-DRB1 // HLA-DRB1 // HLA-DRB1 // HLA-DRB1 // HLA-DRB1 // PTPN6 // IRF8 // HLA-DQA1 // HLA-DPB1 // OAS1 // HLA-B // HLA-B // HLA-B // HLA-B // HLA-B // HLA-B // HLA-B // HLA-B // HLA-B // HLA-B // HLA-B // HLA-B // HLA-B // HLA-B // HLA-B //…	2.43827e-41
GO:0050778	biological_process	positive regulation of immune response	5	IGKC // C1QB // CTSS // CD36 // CCL5 // HLA-DRA // CD14 // HLA-DQB1 // HCK // LCP2 // MNDA // PTPRC // PTPRC // PTPRC // PTPRC // PTPRC // PTPRC // PTPRC // PTPRC // LY96 // HLA-DPA1 // PYCARD // ITGB2 // ITGAM // HLA-DRB1 // HLA-DRB1 // HLA-DRB1 // HLA-DRB1 // HLA-DRB1 // HLA-DRB1 // HLA-DRB1 // HLA-DRB1 // HLA-DRB1 // HLA-DRB1 // HLA-DRB1 // HLA-DRB1 // HLA-DRB1 // CTSB // C1QA // VSIG4 // PTPN…	1.64068e-40
GO:0031347	biological_process	regulation of defense response	5	S100A8 // S100A9 // PLA2G7 // ACP5 // ACP5 // ACP5 // CTSS // CD36 // CCL5 // APOE // APOE // APOE // CD14 // HCK // LY96 // PYCARD // ITGB2 // ITGAM // HLA-DRB1 // DOCK2 // CTSB // PTPN6 // LGMN // FCER1G // LYN // LYN // CD86 // CD86 // TLR1 // TLR1 // TLR1 // TLR2 // TLR7 // ALOX5AP // IL18 // FABP4 // OSM // MAP3K1 // XIAP // MARCO // COLEC12 // FCER1A // CR1 // FGR // FGR // NR1H3 // NR1H3 /…	1.82444e-38
GO:0010033	biological_process	response to organic substance	3	SPP1 // S100A8 // CHI3L1 // IFI30 // S100A9 // ACP5 // ACP5 // ACP5 // CTSS // CD36 // CD36 // CD36 // CD36 // CD36 // CD36 // CD36 // CD36 // HMOX1 // HMOX1 // CCL5 // APOE // APOE // APOE // HLA-DRA // CD14 // CD14 // CD14 // CD14 // HLA-DQB1 // HCK // CTSH // CTSH // LY96 // HLA-DPA1 // LILRB2 // PYCARD // VCAM1 // HLA-DRB1 // HLA-DRB1 // HLA-DRB1 // HLA-DRB1 // HLA-DRB1 // HLA-DRB1 // HLA-DRB…	2.43956e-38
GO:0034097	biological_process	response to cytokine stimulus	4	CHI3L1 // IFI30 // ACP5 // ACP5 // ACP5 // CCL5 // APOE // APOE // APOE // HLA-DRA // HLA-DQB1 // HCK // HLA-DPA1 // PYCARD // VCAM1 // HLA-DRB1 // HLA-DRB1 // HLA-DRB1 // HLA-DRB1 // HLA-DRB1 // HLA-DRB1 // HLA-DRB1 // HLA-DRB1 // HLA-DRB1 // HLA-DRB1 // HLA-DRB1 // HLA-DRB1 // HLA-DRB1 // CCR5 // CCL2 // TIMP2 // TIMP2 // CCR1 // PTPN6 // KYNU // HCLS1 // IRF8 // HLA-DQA1 // HLA-DPB1 // AIF1 //…	6.07902e-38
GO:0050867	biological_process	positive regulation of cell activation	5	CCL5 // HLA-DRA // HLA-DQB1 // PTPRC // PTPRC // HLA-DPA1 // LILRB2 // PYCARD // VCAM1 // HLA-DRB1 // HLA-DRB1 // HLA-DRB1 // HLA-DRB1 // HLA-DRB1 // HLA-DRB1 // HLA-DRB1 // HLA-DRB1 // HLA-DRB1 // HLA-DRB1 // HLA-DRB1 // HLA-DRB1 // HLA-DRB1 // CCL2 // PTPN6 // PTPRJ // SYK // HLA-DMA // HLA-DMA // FCER1G // HLA-DQA1 // CD3D // LYN // VNN1 // CD86 // HLA-DPB1 // AIF1 // PLEK // CCL19 // IL18 // …	3.20604e-37
GO:0002237	biological_process	response to molecule of bacterial origin	5	S100A8 // S100A9 // ACP5 // ACP5 // ACP5 // CD36 // CD36 // CD36 // CD36 // CD36 // CD36 // CD36 // CD36 // CCL5 // CD14 // CD14 // CD14 // CD14 // HCK // LY96 // LILRB2 // PYCARD // CCR5 // NCF2 // NCF2 // NCF2 // ABCA1 // CCL2 // IRF8 // IRF8 // IRF8 // IRF8 // IRF8 // IRF8 // LYN // LYN // TLR1 // TLR1 // TLR1 // IL8 // IL8 // TLR2 // C5AR1 // IL18 // CX3CR1 // CX3CR1 // CX3CR1 // PLCG2 // PLC…	4.45496e-37
GO:0050900	biological_process	leukocyte migration	6	SPP1 // S100A8 // S100A9 // CCL5 // TREM1 // HCK // CXCR4 // MMP1 // ITGB2 // ITGAM // VCAM1 // CCR5 // ITGAX // CCL2 // CCR1 // PTPN6 // SYK // FCER1G // SLC16A3 // LYN // IL8 // C5AR1 // ATP1B1 // CCL19 // CD48 // CXCR2 // CXCR2 // CXCR2 // CXCR2 // CXCR2 // PPBP // CD84 // CD2 // CX3CR1 // CX3CR1 // CX3CR1 // CORO1A // CORO1A // CORO1A // CORO1A // CCL7 // EMR2 // PECAM1 // CCR7 // SCG2 // SLC…	4.84433e-37
GO:0007165	biological_process	signal transduction	4	CCL18 // CHI3L1 // IFI30 // S100A9 // IGKC // CTSS // CD36 // CD36 // CD36 // CD36 // CD36 // CD36 // CD36 // CD36 // HMOX1 // HMOX1 // TYROBP // CCL5 // APOE // HLA-DRA // CD14 // HLA-DQB1 // GPR65 // TREM1 // C3AR1 // GNA13 // GNA13 // HCK // LPL // CXCR4 // LCP2 // MNDA // CTSH // APBB1IP // PTPRC // PTPRC // PTPRC // PTPRC // PTPRC // PTPRC // PTPRC // PTPRC // RGS1 // LY96 // CD53 // FCGR2B …	3.65701e-36
GO:0071310	biological_process	cellular response to organic substance	5	CHI3L1 // IFI30 // CTSS // CD36 // CD36 // CD36 // CD36 // CD36 // CD36 // CD36 // CD36 // CCL5 // APOE // APOE // APOE // HLA-DRA // CD14 // HLA-DQB1 // HCK // CTSH // CTSH // LY96 // HLA-DPA1 // LILRB2 // PYCARD // VCAM1 // HLA-DRB1 // HLA-DRB1 // HLA-DRB1 // HLA-DRB1 // HLA-DRB1 // HLA-DRB1 // HLA-DRB1 // HLA-DRB1 // HLA-DRB1 // HLA-DRB1 // HLA-DRB1 // HLA-DRB1 // HLA-DRB1 // CCR5 // IBSP // C…	4.05009e-35
GO:0002696	biological_process	positive regulation of leukocyte activation	6	CCL5 // HLA-DRA // HLA-DQB1 // PTPRC // PTPRC // HLA-DPA1 // LILRB2 // PYCARD // VCAM1 // HLA-DRB1 // HLA-DRB1 // HLA-DRB1 // HLA-DRB1 // HLA-DRB1 // HLA-DRB1 // HLA-DRB1 // HLA-DRB1 // HLA-DRB1 // HLA-DRB1 // HLA-DRB1 // HLA-DRB1 // HLA-DRB1 // CCL2 // PTPN6 // SYK // HLA-DMA // HLA-DMA // FCER1G // HLA-DQA1 // CD3D // LYN // VNN1 // CD86 // HLA-DPB1 // AIF1 // CCL19 // IL18 // PAK1 // IL7R // I…	1.11666e-34
GO:0050870	biological_process	positive regulation of T cell activation	8	CCL5 // HLA-DRA // HLA-DQB1 // PTPRC // PTPRC // HLA-DPA1 // LILRB2 // PYCARD // VCAM1 // HLA-DRB1 // HLA-DRB1 // HLA-DRB1 // HLA-DRB1 // HLA-DRB1 // HLA-DRB1 // HLA-DRB1 // HLA-DRB1 // HLA-DRB1 // HLA-DRB1 // HLA-DRB1 // HLA-DRB1 // HLA-DRB1 // CCL2 // PTPN6 // SYK // HLA-DMA // HLA-DMA // HLA-DQA1 // CD3D // LYN // VNN1 // CD86 // HLA-DPB1 // AIF1 // CCL19 // IL18 // PAK1 // IL7R // IL7R // IL7…	1.26329e-34
GO:0051249	biological_process	regulation of lymphocyte activation	6	CCL5 // HLA-DRA // HLA-DQB1 // SAMSN1 // SAMSN1 // MNDA // PTPRC // PTPRC // HLA-DPA1 // LILRB2 // PYCARD // VCAM1 // HLA-DRB1 // HLA-DRB1 // HLA-DRB1 // HLA-DRB1 // HLA-DRB1 // HLA-DRB1 // HLA-DRB1 // HLA-DRB1 // HLA-DRB1 // HLA-DRB1 // HLA-DRB1 // HLA-DRB1 // HLA-DRB1 // CCL2 // VSIG4 // PTPN6 // PTPN6 // PTPN6 // SYK // HLA-DMA // HLA-DMA // HLA-DQA1 // CD3D // LYN // LYN // VNN1 // CD86 // HL…	1.3597e-34
GO:0002253	biological_process	activation of immune response	6	IGKC // C1QB // CTSS // CD36 // HLA-DRA // CD14 // HLA-DQB1 // HCK // LCP2 // MNDA // PTPRC // PTPRC // PTPRC // PTPRC // PTPRC // PTPRC // PTPRC // PTPRC // LY96 // HLA-DPA1 // PYCARD // ITGB2 // ITGAM // HLA-DRB1 // HLA-DRB1 // HLA-DRB1 // HLA-DRB1 // HLA-DRB1 // HLA-DRB1 // HLA-DRB1 // HLA-DRB1 // HLA-DRB1 // HLA-DRB1 // HLA-DRB1 // HLA-DRB1 // HLA-DRB1 // CTSB // C1QA // VSIG4 // PTPN6 // PTP…	4.63707e-34
GO:0032496	biological_process	response to lipopolysaccharide	6	S100A8 // S100A9 // ACP5 // ACP5 // ACP5 // CD36 // CD36 // CD36 // CD36 // CD36 // CD36 // CD36 // CD36 // CCL5 // CD14 // CD14 // CD14 // CD14 // HCK // LY96 // LILRB2 // PYCARD // CCR5 // NCF2 // NCF2 // NCF2 // ABCA1 // CCL2 // IRF8 // IRF8 // IRF8 // IRF8 // IRF8 // IRF8 // LYN // LYN // IL8 // IL8 // TLR2 // C5AR1 // IL18 // CX3CR1 // CX3CR1 // CX3CR1 // PLCG2 // PLCG2 // NR1H3 // NR1H3 // …	9.98513e-34
GO:0071345	biological_process	cellular response to cytokine stimulus	6	CHI3L1 // IFI30 // CCL5 // APOE // APOE // APOE // HLA-DRA // HLA-DQB1 // HCK // HLA-DPA1 // PYCARD // VCAM1 // HLA-DRB1 // HLA-DRB1 // HLA-DRB1 // HLA-DRB1 // HLA-DRB1 // HLA-DRB1 // HLA-DRB1 // HLA-DRB1 // HLA-DRB1 // HLA-DRB1 // HLA-DRB1 // HLA-DRB1 // HLA-DRB1 // CCR5 // CCL2 // CCR1 // PTPN6 // HCLS1 // IRF8 // HLA-DQA1 // HLA-DPB1 // AIF1 // OAS1 // HLA-B // HLA-B // HLA-B // HLA-B // HLA-B…	1.07166e-33
GO:0019221	biological_process	cytokine-mediated signaling pathway	7	IFI30 // CCL5 // HLA-DRA // HLA-DQB1 // HCK // HLA-DPA1 // PYCARD // VCAM1 // HLA-DRB1 // HLA-DRB1 // HLA-DRB1 // HLA-DRB1 // HLA-DRB1 // HLA-DRB1 // HLA-DRB1 // HLA-DRB1 // HLA-DRB1 // HLA-DRB1 // HLA-DRB1 // HLA-DRB1 // HLA-DRB1 // CCR5 // CCL2 // CCR1 // PTPN6 // IRF8 // HLA-DQA1 // HLA-DPB1 // OAS1 // HLA-B // HLA-B // HLA-B // HLA-B // HLA-B // HLA-B // HLA-B // HLA-B // HLA-B // HLA-B // HL…	7.37298e-33
GO:0051251	biological_process	positive regulation of lymphocyte activation	7	CCL5 // HLA-DRA // HLA-DQB1 // PTPRC // PTPRC // HLA-DPA1 // LILRB2 // PYCARD // VCAM1 // HLA-DRB1 // HLA-DRB1 // HLA-DRB1 // HLA-DRB1 // HLA-DRB1 // HLA-DRB1 // HLA-DRB1 // HLA-DRB1 // HLA-DRB1 // HLA-DRB1 // HLA-DRB1 // HLA-DRB1 // HLA-DRB1 // CCL2 // PTPN6 // SYK // HLA-DMA // HLA-DMA // HLA-DQA1 // CD3D // LYN // VNN1 // CD86 // HLA-DPB1 // AIF1 // CCL19 // IL18 // PAK1 // IL7R // IL7R // IL7…	3.83178e-32
GO:0002504	biological_process	antigen processing and presentation of peptide or polysaccharide antigen via MHC class II	3	IFI30 // CTSS // HLA-DRA // HLA-DRA // HLA-DRA // HLA-DQB1 // HLA-DQB1 // HLA-DQB1 // HLA-DQB1 // HLA-DQB1 // HLA-DQB1 // HLA-DQB1 // HLA-DQB1 // HLA-DQB1 // HLA-DQB1 // HLA-DQB1 // HLA-DQB1 // HLA-DMB // HLA-DMB // HLA-DMB // HLA-DPA1 // HLA-DPA1 // HLA-DRB1 // HLA-DRB1 // HLA-DRB1 // HLA-DRB1 // HLA-DRB1 // HLA-DRB1 // HLA-DRB1 // HLA-DRB1 // HLA-DRB1 // HLA-DRB1 // HLA-DRB1 // HLA-DRB1 // HLA-…	6.99522e-32
GO:0002478	biological_process	antigen processing and presentation of exogenous peptide antigen	4	IFI30 // CTSS // CD36 // HLA-DRA // HLA-DQB1 // HLA-DMB // HLA-DPA1 // HLA-DRB1 // HLA-DRB1 // HLA-DRB1 // HLA-DRB1 // HLA-DRB1 // HLA-DRB1 // HLA-DRB1 // HLA-DRB1 // HLA-DRB1 // HLA-DRB1 // HLA-DRB1 // HLA-DRB1 // HLA-DRB1 // NCF2 // LGMN // HLA-DMA // HLA-DMA // FCER1G // HLA-DQA1 // HLA-DPB1 // HLA-B // HLA-B // HLA-B // HLA-B // HLA-B // HLA-B // HLA-B // HLA-B // HLA-B // HLA-B // HLA-B // H…	7.34364e-32
GO:0001775	biological_process	cell activation	3	CD36 // TYROBP // CCL5 // GNA13 // GNA13 // CXCR4 // LCP2 // APBB1IP // PTPRC // PTPRC // SERPINA1 // LCP1 // PYCARD // ITGAM // VCAM1 // DOCK2 // DOCK2 // SYK // HLA-DMA // HLA-DMA // FCER1G // F13A1 // CD3D // LYN // LYN // CD86 // CD86 // SRGN // TLR1 // AIF1 // GNA15 // IL8 // IL8 // SLAMF7 // TLR7 // PLEK // CCL19 // CD48 // CXCR2 // RASGRP1 // RAC2 // PPBP // IL7R // IL7R // IL7R // CD2 // …	1.70029e-31
GO:0019884	biological_process	antigen processing and presentation of exogenous antigen	3	IFI30 // CTSS // CD36 // HLA-DRA // HLA-DQB1 // HLA-DMB // HLA-DPA1 // HLA-DRB1 // HLA-DRB1 // HLA-DRB1 // HLA-DRB1 // HLA-DRB1 // HLA-DRB1 // HLA-DRB1 // HLA-DRB1 // HLA-DRB1 // HLA-DRB1 // HLA-DRB1 // HLA-DRB1 // HLA-DRB1 // NCF2 // LGMN // HLA-DMA // HLA-DMA // FCER1G // HLA-DQA1 // HLA-DPB1 // HLA-B // HLA-B // HLA-B // HLA-B // HLA-B // HLA-B // HLA-B // HLA-B // HLA-B // HLA-B // HLA-B // H…	1.82142e-31
GO:0048518	biological_process	positive regulation of biological process	3	SPP1 // MMP12 // APOC1 // S100A8 // CHI3L1 // MMP9 // S100A9 // IGKC // PLA2G7 // C1QB // CTSS // CD36 // CD36 // CD36 // CD36 // CD36 // CD36 // CD36 // CD36 // HMOX1 // HMOX1 // CCL5 // APOE // APOE // APOE // HLA-DRA // CD14 // CD14 // CD14 // CD14 // HLA-DQB1 // GPR65 // C3AR1 // C3AR1 // HBB // HCK // LPL // LPL // LPL // LPL // CXCR4 // LCP2 // MNDA // CTSH // CTSH // PTPRC // PTPRC // PTPR…	6.63298e-31
GO:0001817	biological_process	regulation of cytokine production	4	ACP5 // ACP5 // ACP5 // CD36 // CD36 // CD36 // CD36 // CD36 // CD36 // CD36 // CD36 // HMOX1 // HMOX1 // CD14 // CD14 // CD14 // CD14 // C3AR1 // C3AR1 // LILRB2 // PYCARD // HLA-DRB1 // HLA-DRB1 // HLA-DRB1 // HLA-DRB1 // HLA-DRB1 // CCL2 // VSIG4 // SYK // FCER1G // IRF8 // IRF8 // IRF8 // IRF8 // IRF8 // IRF8 // CASP1 // LYN // LYN // CLEC5A // CD86 // SRGN // TLR1 // TLR1 // TLR1 // TLR1 // …	7.95419e-31
GO:0002764	biological_process	immune response-regulating signaling pathway	5	IGKC // CTSS // CD36 // HLA-DRA // CD14 // HLA-DQB1 // HCK // LCP2 // MNDA // CTSH // PTPRC // PTPRC // PTPRC // PTPRC // PTPRC // PTPRC // PTPRC // PTPRC // LY96 // HLA-DPA1 // LILRB2 // ITGB2 // ITGAM // HLA-DRB1 // HLA-DRB1 // HLA-DRB1 // HLA-DRB1 // HLA-DRB1 // HLA-DRB1 // HLA-DRB1 // HLA-DRB1 // HLA-DRB1 // HLA-DRB1 // HLA-DRB1 // HLA-DRB1 // HLA-DRB1 // CTSB // PTPN6 // PTPN6 // PTPN6 // SY…	1.68361e-30
GO:0050863	biological_process	regulation of T cell activation	7	CCL5 // HLA-DRA // HLA-DQB1 // PTPRC // PTPRC // HLA-DPA1 // LILRB2 // PYCARD // VCAM1 // HLA-DRB1 // HLA-DRB1 // HLA-DRB1 // HLA-DRB1 // HLA-DRB1 // HLA-DRB1 // HLA-DRB1 // HLA-DRB1 // HLA-DRB1 // HLA-DRB1 // HLA-DRB1 // HLA-DRB1 // HLA-DRB1 // CCL2 // VSIG4 // PTPN6 // PTPN6 // PTPN6 // SYK // HLA-DMA // HLA-DMA // HLA-DQA1 // CD3D // LYN // VNN1 // CD86 // HLA-DPB1 // AIF1 // CCL19 // IL18 // …	2.35224e-30
GO:0002757	biological_process	immune response-activating signal transduction	7	IGKC // CTSS // CD36 // HLA-DRA // CD14 // HLA-DQB1 // HCK // LCP2 // MNDA // PTPRC // PTPRC // PTPRC // PTPRC // PTPRC // PTPRC // PTPRC // PTPRC // LY96 // HLA-DPA1 // ITGB2 // ITGAM // HLA-DRB1 // HLA-DRB1 // HLA-DRB1 // HLA-DRB1 // HLA-DRB1 // HLA-DRB1 // HLA-DRB1 // HLA-DRB1 // HLA-DRB1 // HLA-DRB1 // HLA-DRB1 // HLA-DRB1 // HLA-DRB1 // CTSB // PTPN6 // PTPN6 // PTPN6 // SYK // LGMN // FCER1…	4.44989e-30
GO:0051239	biological_process	regulation of multicellular organismal process	3	SPP1 // APOC1 // CHI3L1 // ACP5 // ACP5 // ACP5 // CD36 // CD36 // CD36 // CD36 // CD36 // CD36 // CD36 // CD36 // HMOX1 // HMOX1 // APOE // APOE // APOE // CD14 // CD14 // CD14 // CD14 // C3AR1 // C3AR1 // CXCR4 // TMEM176B // CTSH // CTSH // PTPRC // PTPRC // LILRB2 // PYCARD // HLA-DRB1 // HLA-DRB1 // HLA-DRB1 // HLA-DRB1 // HLA-DRB1 // LILRB4 // CCL2 // TIMP2 // TIMP2 // CCR1 // VSIG4 // PTPN…	9.02949e-30
GO:0023052	biological_process	signaling	1	CCL18 // CHI3L1 // IFI30 // S100A9 // IGKC // CTSS // CD36 // CD36 // CD36 // CD36 // CD36 // CD36 // CD36 // CD36 // HMOX1 // HMOX1 // TYROBP // CCL5 // APOE // HLA-DRA // CD14 // HLA-DQB1 // GPR65 // TREM1 // C3AR1 // GNA13 // GNA13 // HCK // LPL // CXCR4 // LCP2 // MNDA // CTSH // APBB1IP // PTPRC // PTPRC // PTPRC // PTPRC // PTPRC // PTPRC // PTPRC // PTPRC // RGS1 // LY96 // CD53 // FCGR2B …	1.13707e-29
GO:0044700	biological_process	single organism signaling	2	CCL18 // CHI3L1 // IFI30 // S100A9 // IGKC // CTSS // CD36 // CD36 // CD36 // CD36 // CD36 // CD36 // CD36 // CD36 // HMOX1 // HMOX1 // TYROBP // CCL5 // APOE // HLA-DRA // CD14 // HLA-DQB1 // GPR65 // TREM1 // C3AR1 // GNA13 // GNA13 // HCK // LPL // CXCR4 // LCP2 // MNDA // CTSH // APBB1IP // PTPRC // PTPRC // PTPRC // PTPRC // PTPRC // PTPRC // PTPRC // PTPRC // RGS1 // LY96 // CD53 // FCGR2B …	1.13707e-29
GO:0048002	biological_process	antigen processing and presentation of peptide antigen	3	IFI30 // CTSS // CD36 // HLA-DRA // HLA-DQB1 // HLA-DMB // HLA-DPA1 // HLA-DRB1 // HLA-DRB1 // HLA-DRB1 // HLA-DRB1 // HLA-DRB1 // HLA-DRB1 // HLA-DRB1 // HLA-DRB1 // HLA-DRB1 // HLA-DRB1 // HLA-DRB1 // HLA-DRB1 // HLA-DRB1 // NCF2 // LGMN // HLA-DMA // HLA-DMA // FCER1G // HLA-DQA1 // HLA-DPB1 // HLA-B // HLA-B // HLA-B // HLA-B // HLA-B // HLA-B // HLA-B // HLA-B // HLA-B // HLA-B // HLA-B // H…	1.33528e-29
GO:0007154	biological_process	cell communication	3	CCL18 // CHI3L1 // IFI30 // S100A9 // IGKC // CTSS // CD36 // CD36 // CD36 // CD36 // CD36 // CD36 // CD36 // CD36 // VAMP8 // HMOX1 // HMOX1 // TYROBP // CCL5 // APOE // HLA-DRA // CD14 // HLA-DQB1 // GPR65 // TREM1 // C3AR1 // GNA13 // GNA13 // HCK // LPL // CXCR4 // LCP2 // MNDA // CTSH // APBB1IP // PTPRC // PTPRC // PTPRC // PTPRC // PTPRC // PTPRC // PTPRC // PTPRC // RGS1 // LY96 // SNX10 …	3.17525e-29
GO:0002480	biological_process	antigen processing and presentation of exogenous peptide antigen via MHC class I, TAP-independent	6	CTSS // HLA-B // HLA-B // HLA-B // HLA-B // HLA-B // HLA-B // HLA-B // HLA-B // HLA-B // HLA-B // HLA-B // HLA-B // HLA-B // HLA-B // HLA-B // HLA-B // HLA-B // HLA-B // HLA-B // HLA-B // HLA-B // HLA-B // HLA-B // HLA-B // HLA-B // HLA-B // HLA-B // HLA-B // HLA-B // HLA-B // HLA-B // HLA-B // HLA-B // HLA-B // HLA-E	5.43849e-29
GO:0060337	biological_process	type I interferon-mediated signaling pathway	8	PTPN6 // IRF8 // OAS1 // HLA-B // HLA-B // HLA-B // HLA-B // HLA-B // HLA-B // HLA-B // HLA-B // HLA-B // HLA-B // HLA-B // HLA-B // HLA-B // HLA-B // HLA-B // HLA-B // HLA-B // HLA-B // HLA-B // HLA-B // HLA-B // HLA-B // HLA-B // HLA-B // HLA-B // HLA-B // HLA-B // HLA-B // HLA-B // HLA-B // HLA-B // HLA-B // HLA-B // HLA-B // IFI27 // IFNAR2 // OAS3 // MX1 // PSMB8 // ISG15 // HLA-E // IFITM1 …	2.12278e-28
GO:0071357	biological_process	cellular response to type I interferon	7	PTPN6 // IRF8 // OAS1 // HLA-B // HLA-B // HLA-B // HLA-B // HLA-B // HLA-B // HLA-B // HLA-B // HLA-B // HLA-B // HLA-B // HLA-B // HLA-B // HLA-B // HLA-B // HLA-B // HLA-B // HLA-B // HLA-B // HLA-B // HLA-B // HLA-B // HLA-B // HLA-B // HLA-B // HLA-B // HLA-B // HLA-B // HLA-B // HLA-B // HLA-B // HLA-B // HLA-B // HLA-B // IFI27 // IFNAR2 // OAS3 // MX1 // PSMB8 // ISG15 // HLA-E // IFITM1 …	3.43722e-28
GO:0034340	biological_process	response to type I interferon	5	PTPN6 // IRF8 // OAS1 // HLA-B // HLA-B // HLA-B // HLA-B // HLA-B // HLA-B // HLA-B // HLA-B // HLA-B // HLA-B // HLA-B // HLA-B // HLA-B // HLA-B // HLA-B // HLA-B // HLA-B // HLA-B // HLA-B // HLA-B // HLA-B // HLA-B // HLA-B // HLA-B // HLA-B // HLA-B // HLA-B // HLA-B // HLA-B // HLA-B // HLA-B // HLA-B // HLA-B // HLA-B // IFI27 // IFNAR2 // OAS3 // MX1 // PSMB8 // ISG15 // HLA-E // IFITM1 …	5.53145e-28
GO:0060326	biological_process	cell chemotaxis	6	SPP1 // S100A8 // S100A9 // CCL5 // CXCR4 // ITGB2 // ITGAM // CCR5 // CCL2 // CCR1 // SYK // FCER1G // IL8 // C5AR1 // CCL19 // CXCR2 // CXCR2 // CXCR2 // CXCR2 // CXCR2 // BIN2 // PPBP // CX3CR1 // CX3CR1 // CX3CR1 // CORO1A // CORO1A // CORO1A // CORO1A // CCL7 // DOCK4 // EMR2 // ARRB2 // CCR7 // SCG2 // IL1B // IL1B // IL1B // IL1B // CKLF // FLT1 // CXCL3 // NCKAP1L // PDGFRA // PDGFRA // P…	2.88387e-27
GO:0031349	biological_process	positive regulation of defense response	6	S100A8 // S100A9 // PLA2G7 // CTSS // CD36 // CCL5 // CD14 // HCK // LY96 // PYCARD // ITGB2 // ITGAM // CTSB // LGMN // FCER1G // CD86 // CD86 // TLR1 // TLR1 // TLR1 // TLR2 // TLR7 // ALOX5AP // IL18 // FABP4 // OSM // MAP3K1 // MARCO // COLEC12 // FCER1A // TLR4 // MAPK13 // CTSL1 // CCR7 // CCR7 // CCR7 // CTSK // BIRC3 // CD28 // IL1B // IL1B // IL1B // IL1B // CD1D // CRTAM // TLR5 // IRAK…	3.35833e-27
GO:0030595	biological_process	leukocyte chemotaxis	7	SPP1 // S100A8 // S100A9 // CCL5 // CXCR4 // ITGB2 // ITGAM // CCR5 // CCL2 // CCR1 // SYK // FCER1G // IL8 // C5AR1 // CCL19 // CXCR2 // CXCR2 // CXCR2 // CXCR2 // CXCR2 // PPBP // CX3CR1 // CX3CR1 // CX3CR1 // CORO1A // CORO1A // CORO1A // CORO1A // CCL7 // EMR2 // CCR7 // SCG2 // IL1B // IL1B // IL1B // IL1B // CKLF // FLT1 // CXCL3 // NCKAP1L // CSF3R // CSF3R // CCL13 // IL10 // S100A12 // P…	1.09878e-26
GO:0044763	biological_process	single-organism cellular process	2	SPP1 // SPP1 // MMP12 // CCL18 // APOC1 // S100A8 // CHI3L1 // MMP9 // CD52 // IFI30 // S100A9 // IGKC // BCL2A1 // CTSS // CD36 // CD36 // CD36 // CD36 // CD36 // CD36 // CD36 // CD36 // CD36 // CD36 // CD36 // CD36 // CD36 // VAMP8 // VAMP8 // LYZ // LYZ // HMOX1 // HMOX1 // TYROBP // CCL5 // APOE // APOE // APOE // HLA-DRA // CP // CP // CP // CP // CP // CD14 // HLA-DQB1 // GPR65 // TREM1 // …	1.77073e-26
GO:0044699	biological_process	single-organism process	1	SPP1 // SPP1 // MMP12 // CCL18 // APOC1 // S100A8 // CHI3L1 // MMP9 // CD52 // IFI30 // S100A9 // IGKC // BCL2A1 // PLA2G7 // C1QB // C1QB // C1QB // C1QB // ACP5 // ACP5 // ACP5 // CTSS // CD36 // CD36 // CD36 // CD36 // CD36 // CD36 // CD36 // CD36 // CD36 // CD36 // CD36 // CD36 // CD36 // VAMP8 // VAMP8 // LYZ // LYZ // HMOX1 // HMOX1 // TYROBP // CCL5 // APOE // APOE // APOE // APOE // HLA-D…	2.73887e-26
GO:0030193	biological_process	regulation of blood coagulation	6	CD36 // CD36 // CD36 // CD36 // CD36 // CD36 // CD36 // CD36 // APOE // PTPRJ // SYK // FCER1G // LYN // LYN // PLEK // PLAUR // TLR4 // PLAT // PDPN // PDPN // PLAU // PDGFRA // ANXA2 // ANXA2 // ANXA2 // ANXA2 // ANXA2 // ANXA2 // ANXA2 // ANXA2 // ANXA2 // ANXA2 // ANXA2 // ANXA2 // ANXA2 // ANXA2 // ANXA2 // ANXA2 // ANXA2 // THBS1 // SERPINE1 // HPSE // F2R	3.51068e-25
GO:1900046	biological_process	regulation of hemostasis	4	CD36 // CD36 // CD36 // CD36 // CD36 // CD36 // CD36 // CD36 // APOE // PTPRJ // SYK // FCER1G // LYN // LYN // PLEK // PLAUR // TLR4 // PLAT // PDPN // PDPN // PLAU // PDGFRA // ANXA2 // ANXA2 // ANXA2 // ANXA2 // ANXA2 // ANXA2 // ANXA2 // ANXA2 // ANXA2 // ANXA2 // ANXA2 // ANXA2 // ANXA2 // ANXA2 // ANXA2 // ANXA2 // ANXA2 // THBS1 // SERPINE1 // HPSE // F2R	3.51068e-25
GO:0007155	biological_process	cell adhesion	3	SPP1 // SPP1 // S100A8 // S100A9 // CD36 // CD36 // CD36 // CD36 // CD36 // CD36 // CD36 // CD36 // CD36 // CD36 // CD36 // CD36 // CD36 // CCL5 // CSTA // HCK // PTPRC // PTPRC // CD300A // LILRB2 // ITGB2 // ITGB2 // ITGB2 // ITGB2 // ITGB2 // ITGB2 // ITGB2 // ITGB2 // ITGB2 // ITGB2 // ITGB2 // ITGAM // VCAM1 // VCAM1 // IBSP // ITGAX // ITGAX // CCL2 // CCR1 // SYK // VNN1 // SLAMF7 // ATP1B…	8.96426e-25
GO:0022610	biological_process	biological adhesion	1	SPP1 // SPP1 // S100A8 // S100A9 // CD36 // CD36 // CD36 // CD36 // CD36 // CD36 // CD36 // CD36 // CD36 // CD36 // CD36 // CD36 // CD36 // CCL5 // CSTA // HCK // PTPRC // PTPRC // CD300A // LILRB2 // ITGB2 // ITGB2 // ITGB2 // ITGB2 // ITGB2 // ITGB2 // ITGB2 // ITGB2 // ITGB2 // ITGB2 // ITGB2 // ITGAM // VCAM1 // VCAM1 // IBSP // ITGAX // ITGAX // CCL2 // CCR1 // SYK // VNN1 // SLAMF7 // ATP1B…	1.04888e-24
GO:0050789	biological_process	regulation of biological process	2	SPP1 // MMP12 // CCL18 // APOC1 // S100A8 // CHI3L1 // MMP9 // IFI30 // S100A9 // IGKC // BCL2A1 // PLA2G7 // C1QB // ACP5 // ACP5 // ACP5 // CTSS // CD36 // CD36 // CD36 // CD36 // CD36 // CD36 // CD36 // CD36 // VAMP8 // VAMP8 // HMOX1 // HMOX1 // TYROBP // ADAMDEC1 // CCL5 // APOE // APOE // APOE // HLA-DRA // CD14 // CD14 // CD14 // CD14 // HLA-DQB1 // GPR65 // GMFG // SAMSN1 // SAMSN1 // TRE…	1.06782e-24
GO:0032675	biological_process	regulation of interleukin-6 production	5	CD36 // CD36 // CD36 // CD36 // CD36 // CD36 // CD36 // CD36 // LILRB2 // PYCARD // FCER1G // TLR1 // TLR1 // TLR1 // TLR1 // TLR1 // HLA-B // TLR2 // TLR7 // TLR4 // ARRB2 // ARRB2 // MAPK13 // IL1B // IL1B // IL1B // IL1B // CSK // CSK // CSK // CSK // NCKAP1L // IRAK3 // MYD88 // MYD88 // MYD88 // P2RX7 // P2RX7 // TNFAIP3 // TNFAIP3 // TNFAIP3 // TNFAIP3 // IL10 // F2R	1.14941e-24
GO:0010744	biological_process	positive regulation of macrophage derived foam cell differentiation	6	CD36 // CD36 // CD36 // CD36 // CD36 // CD36 // CD36 // CD36 // LPL // LPL // LPL // LPL // MSR1 // MSR1 // PRKCH // PRKCH // PRKCH // PRKCH // PRKCH // PRKCH // PRKCH // PRKCH // PRKCH // PRKCH // PRKCH // PRKCH // PF4	1.2135e-24
GO:0002252	biological_process	immune effector process	2	IGKC // C1QB // TYROBP // HLA-DQB1 // HCK // CTSH // CTSH // PTPRC // PTPRC // LCP1 // PYCARD // HLA-DRB1 // HLA-DRB1 // HLA-DRB1 // HLA-DRB1 // HLA-DRB1 // HLA-DRB1 // DOCK2 // DOCK2 // ITGAX // C1QA // VSIG4 // PTPN6 // PTPN6 // PTPN6 // SYK // HLA-DMA // HLA-DMA // FCER1G // LYN // LYN // CD86 // CD86 // IGKV4-1 // OAS1 // OAS1 // OAS1 // OAS1 // OAS1 // OAS1 // OAS1 // SLAMF7 // TLR7 // FCN1 …	1.64754e-24
GO:0033993	biological_process	response to lipid	4	SPP1 // S100A8 // S100A9 // ACP5 // ACP5 // ACP5 // CD36 // CD36 // CD36 // CD36 // CD36 // CD36 // CD36 // CD36 // HMOX1 // HMOX1 // CCL5 // APOE // APOE // APOE // CD14 // CD14 // CD14 // CD14 // HCK // CTSH // CTSH // LY96 // LILRB2 // PYCARD // CCR5 // NCF2 // NCF2 // NCF2 // ABCA1 // CCL2 // BID // ABCG1 // IRF8 // IRF8 // IRF8 // IRF8 // IRF8 // IRF8 // LYN // LYN // UCP2 // UCP2 // IL8 // …	5.75069e-24
GO:0007166	biological_process	cell surface receptor signaling pathway	5	IFI30 // IGKC // CD36 // CD36 // CD36 // CD36 // CD36 // CD36 // CD36 // CD36 // TYROBP // CCL5 // APOE // HLA-DRA // CD14 // HLA-DQB1 // GPR65 // C3AR1 // GNA13 // GNA13 // HCK // CXCR4 // LCP2 // MNDA // PTPRC // PTPRC // PTPRC // PTPRC // PTPRC // PTPRC // PTPRC // PTPRC // RGS1 // LY96 // HLA-DPA1 // LILRB2 // PYCARD // ITGB2 // ITGB2 // ITGB2 // ITGB2 // ITGB2 // ITGB2 // ITGB2 // ITGB2 // I…	8.11109e-24
GO:0071216	biological_process	cellular response to biotic stimulus	4	CD36 // CD36 // CD36 // CD36 // CD36 // CD36 // CD36 // CD36 // CCL5 // CD14 // HCK // LY96 // LILRB2 // PYCARD // CCR5 // ABCA1 // CCL2 // SYK // IRF8 // IRF8 // IRF8 // IRF8 // IRF8 // IRF8 // LYN // LYN // TLR1 // IL8 // IL8 // TLR2 // IL18 // CX3CR1 // CX3CR1 // CX3CR1 // NR1H3 // NR1H3 // NR1H3 // NR1H3 // NR1H3 // NR1H3 // NR1H3 // NR1H3 // TLR4 // SCARB1 // TNFRSF1B // TXNIP // IL1B // SER…	8.57491e-24
GO:0045321	biological_process	leukocyte activation	4	TYROBP // CCL5 // CXCR4 // LCP2 // PTPRC // PTPRC // LCP1 // PYCARD // ITGAM // VCAM1 // DOCK2 // DOCK2 // SYK // HLA-DMA // HLA-DMA // FCER1G // CD3D // LYN // LYN // CD86 // CD86 // TLR1 // AIF1 // IL8 // IL8 // SLAMF7 // TLR7 // CCL19 // CD48 // CXCR2 // PPBP // IL7R // IL7R // IL7R // CD2 // CX3CR1 // CX3CR1 // CX3CR1 // PLCG2 // PLCG2 // TLR4 // MYO1F // DPP4 // CCR7 // CCR7 // CCR7 // GPR18…	8.8811e-24
GO:0042590	biological_process	antigen processing and presentation of exogenous peptide antigen via MHC class I	5	IFI30 // CTSS // CD36 // NCF2 // FCER1G // HLA-B // HLA-B // HLA-B // HLA-B // HLA-B // HLA-B // HLA-B // HLA-B // HLA-B // HLA-B // HLA-B // HLA-B // HLA-B // HLA-B // HLA-B // HLA-B // HLA-B // HLA-B // HLA-B // HLA-B // HLA-B // HLA-B // HLA-B // HLA-B // HLA-B // HLA-B // HLA-B // HLA-B // HLA-B // HLA-B // HLA-B // HLA-B // HLA-B // HLA-B // CYBA // NCF4 // PSMB8 // PSMB10 // PSMB9 // CYBB /…	1.06709e-23
GO:0050851	biological_process	antigen receptor-mediated signaling pathway	9	HLA-DRA // HLA-DQB1 // LCP2 // MNDA // PTPRC // PTPRC // PTPRC // PTPRC // PTPRC // PTPRC // PTPRC // PTPRC // HLA-DPA1 // HLA-DRB1 // HLA-DRB1 // HLA-DRB1 // HLA-DRB1 // HLA-DRB1 // HLA-DRB1 // HLA-DRB1 // HLA-DRB1 // HLA-DRB1 // HLA-DRB1 // HLA-DRB1 // HLA-DRB1 // HLA-DRB1 // PTPN6 // PTPN6 // PTPN6 // SYK // HLA-DQA1 // CD3D // LYN // LYN // HLA-DPB1 // FYB // PAK1 // PLCG2 // PLCG2 // ITK // …	1.06709e-23
GO:0071219	biological_process	cellular response to molecule of bacterial origin	6	CD36 // CD36 // CD36 // CD36 // CD36 // CD36 // CD36 // CD36 // CCL5 // CD14 // HCK // LY96 // LILRB2 // PYCARD // CCR5 // ABCA1 // CCL2 // IRF8 // IRF8 // IRF8 // IRF8 // IRF8 // IRF8 // LYN // LYN // TLR1 // IL8 // IL8 // TLR2 // IL18 // CX3CR1 // CX3CR1 // CX3CR1 // NR1H3 // NR1H3 // NR1H3 // NR1H3 // NR1H3 // NR1H3 // NR1H3 // NR1H3 // TLR4 // SCARB1 // TNFRSF1B // IL1B // SERPINE1 // MYD88 /…	1.71417e-23
GO:0010743	biological_process	regulation of macrophage derived foam cell differentiation	5	CD36 // CD36 // CD36 // CD36 // CD36 // CD36 // CD36 // CD36 // LPL // LPL // LPL // LPL // ABCA1 // ABCG1 // NR1H3 // MSR1 // MSR1 // PRKCH // PRKCH // PRKCH // PRKCH // PRKCH // PRKCH // PRKCH // PRKCH // PRKCH // PRKCH // PRKCH // PRKCH // PPARG // PF4	1.96955e-23
GO:0071222	biological_process	cellular response to lipopolysaccharide	7	CD36 // CD36 // CD36 // CD36 // CD36 // CD36 // CD36 // CD36 // CCL5 // CD14 // HCK // LY96 // LILRB2 // PYCARD // CCR5 // ABCA1 // CCL2 // IRF8 // IRF8 // IRF8 // IRF8 // IRF8 // IRF8 // LYN // LYN // IL8 // IL8 // TLR2 // IL18 // CX3CR1 // CX3CR1 // CX3CR1 // NR1H3 // NR1H3 // NR1H3 // NR1H3 // NR1H3 // NR1H3 // NR1H3 // NR1H3 // TLR4 // SCARB1 // TNFRSF1B // IL1B // SERPINE1 // MYD88 // MYD88 …	2.02274e-23
GO:0051701	biological_process	interaction with host	4	HCK // CXCR4 // MMP1 // ANPEP // FCGR2B // VCAM1 // CCR5 // NCF2 // SYK // PILRA // LYN // CLEC5A // CD86 // HLA-B // HLA-B // HLA-B // HLA-B // HLA-B // HLA-B // HLA-B // HLA-B // HLA-B // HLA-B // HLA-B // HLA-B // HLA-B // HLA-B // HLA-B // HLA-B // HLA-B // HLA-B // HLA-B // HLA-B // HLA-B // HLA-B // HLA-B // HLA-B // HLA-B // HLA-B // HLA-B // HLA-B // HLA-B // HLA-B // HLA-B // HLA-B // HL…	3.68938e-23
GO:0006935	biological_process	chemotaxis	4	SPP1 // CCL18 // S100A8 // S100A9 // TYROBP // CCL5 // C3AR1 // C3AR1 // CXCR4 // PTPRC // ITGB2 // ITGAM // DOCK2 // DOCK2 // CCR5 // CCL2 // FPR3 // CCR1 // PTPRJ // SYK // FCER1G // CCL8 // IL8 // C5AR1 // CCL19 // CXCR2 // CXCR2 // CXCR2 // CXCR2 // CXCR2 // RALA // BIN2 // RAC2 // RAC2 // RAC2 // PLAUR // PPBP // CCRL2 // CCRL2 // PAK1 // TREM2 // CX3CR1 // CX3CR1 // CX3CR1 // TYMP // CORO1A…	3.90268e-23
GO:0042330	biological_process	taxis	3	SPP1 // CCL18 // S100A8 // S100A9 // TYROBP // CCL5 // C3AR1 // C3AR1 // CXCR4 // PTPRC // ITGB2 // ITGAM // DOCK2 // DOCK2 // CCR5 // CCL2 // FPR3 // CCR1 // PTPRJ // SYK // FCER1G // CCL8 // IL8 // C5AR1 // CCL19 // CXCR2 // CXCR2 // CXCR2 // CXCR2 // CXCR2 // RALA // BIN2 // RAC2 // RAC2 // RAC2 // PLAUR // PPBP // CCRL2 // CCRL2 // PAK1 // TREM2 // CX3CR1 // CX3CR1 // CX3CR1 // TYMP // CORO1A…	3.90268e-23
GO:0050818	biological_process	regulation of coagulation	4	CD36 // CD36 // CD36 // CD36 // CD36 // CD36 // CD36 // CD36 // APOE // PTPRJ // SYK // FCER1G // LYN // LYN // PLEK // PLAUR // TLR4 // PROCR // PLAT // PDPN // PDPN // PLAU // PDGFRA // ANXA2 // ANXA2 // ANXA2 // ANXA2 // ANXA2 // ANXA2 // ANXA2 // ANXA2 // ANXA2 // ANXA2 // ANXA2 // ANXA2 // ANXA2 // ANXA2 // ANXA2 // ANXA2 // ANXA2 // THBS1 // SERPINE1 // HPSE // F2R	4.5125e-23
GO:0065007	biological_process	biological regulation	1	SPP1 // MMP12 // CCL18 // APOC1 // S100A8 // CHI3L1 // MMP9 // CD52 // IFI30 // S100A9 // IGKC // BCL2A1 // PLA2G7 // C1QB // ACP5 // ACP5 // ACP5 // CTSS // CD36 // CD36 // CD36 // CD36 // CD36 // CD36 // CD36 // CD36 // VAMP8 // VAMP8 // HMOX1 // HMOX1 // TYROBP // ADAMDEC1 // CCL5 // APOE // APOE // APOE // HLA-DRA // CP // CP // CP // CP // CP // CD14 // CD14 // CD14 // CD14 // HLA-DQB1 // GP…	5.78447e-23
GO:0044403	biological_process	symbiosis, encompassing mutualism through parasitism	3	CCL5 // HCK // CXCR4 // MMP1 // ANPEP // FCGR2B // VCAM1 // CCR5 // NCF2 // SYK // PILRA // LYN // CLEC5A // CD86 // HLA-B // HLA-B // HLA-B // HLA-B // HLA-B // HLA-B // HLA-B // HLA-B // HLA-B // HLA-B // HLA-B // HLA-B // HLA-B // HLA-B // HLA-B // HLA-B // HLA-B // HLA-B // HLA-B // HLA-B // HLA-B // HLA-B // HLA-B // HLA-B // HLA-B // HLA-B // HLA-B // HLA-B // HLA-B // HLA-B // HLA-B // HLA…	7.37842e-23
GO:0044419	biological_process	interspecies interaction between organisms	2	CCL5 // HCK // CXCR4 // MMP1 // ANPEP // FCGR2B // VCAM1 // CCR5 // NCF2 // SYK // PILRA // LYN // CLEC5A // CD86 // HLA-B // HLA-B // HLA-B // HLA-B // HLA-B // HLA-B // HLA-B // HLA-B // HLA-B // HLA-B // HLA-B // HLA-B // HLA-B // HLA-B // HLA-B // HLA-B // HLA-B // HLA-B // HLA-B // HLA-B // HLA-B // HLA-B // HLA-B // HLA-B // HLA-B // HLA-B // HLA-B // HLA-B // HLA-B // HLA-B // HLA-B // HLA…	7.37842e-23
GO:0040011	biological_process	locomotion	1	SPP1 // MMP12 // CCL18 // S100A8 // S100A9 // TYROBP // CCL5 // TREM1 // C3AR1 // C3AR1 // HCK // CXCR4 // PTPRC // MMP1 // ITGB2 // ITGAM // VCAM1 // DOCK2 // DOCK2 // CCR5 // ITGAX // CCL2 // FPR3 // CCR1 // PTPN6 // PTPRJ // SYK // FCER1G // CCL8 // PLTP // SLC16A3 // LYN // IL8 // HTR2B // C5AR1 // ATP1B1 // CCL19 // CD48 // CXCR2 // CXCR2 // CXCR2 // CXCR2 // CXCR2 // RALA // BIN2 // RAC2 //…	7.96098e-23
GO:0031295	biological_process	T cell costimulation	9	HLA-DRA // HLA-DQB1 // HLA-DPA1 // HLA-DRB1 // HLA-DRB1 // HLA-DRB1 // HLA-DRB1 // HLA-DRB1 // HLA-DRB1 // HLA-DRB1 // HLA-DRB1 // HLA-DRB1 // HLA-DRB1 // HLA-DRB1 // HLA-DRB1 // HLA-DRB1 // PTPN6 // HLA-DQA1 // CD3D // LYN // CD86 // HLA-DPB1 // CCL19 // PAK1 // VAV1 // DPP4 // GRB2 // CD28 // CSK // TRAC // CD80 // CD4 // LGALS8 // LGALS8 // LGALS8 // LGALS8 // LGALS8 // LCK	1.80641e-22
GO:0002697	biological_process	regulation of immune effector process	4	CD36 // CD36 // CD36 // CD36 // CD36 // CD36 // CD36 // CD36 // HMOX1 // HMOX1 // HCK // PTPRC // PTPRC // DOCK2 // CCL2 // PTPN6 // PTPN6 // PTPN6 // SYK // FCER1G // LYN // LYN // CD37 // CD86 // TLR2 // CCL19 // IL7R // IL7R // IL7R // FCER1A // CR1 // FGR // FGR // TLR4 // ARRB2 // APOBEC3G // SASH3 // C2 // BIRC3 // CD28 // IL1B // CRTAM // PACS1 // CFH // IRAK3 // CD80 // CD4 // IL12RB1 // …	2.89928e-22
GO:0031294	biological_process	lymphocyte costimulation	8	HLA-DRA // HLA-DQB1 // HLA-DPA1 // HLA-DRB1 // HLA-DRB1 // HLA-DRB1 // HLA-DRB1 // HLA-DRB1 // HLA-DRB1 // HLA-DRB1 // HLA-DRB1 // HLA-DRB1 // HLA-DRB1 // HLA-DRB1 // HLA-DRB1 // HLA-DRB1 // PTPN6 // HLA-DQA1 // CD3D // LYN // CD86 // HLA-DPB1 // CCL19 // PAK1 // VAV1 // DPP4 // GRB2 // CD28 // CSK // TRAC // CD80 // CD4 // LGALS8 // LGALS8 // LGALS8 // LGALS8 // LGALS8 // LCK	2.92147e-22
GO:1901700	biological_process	response to oxygen-containing compound	3	SPP1 // S100A8 // S100A9 // ACP5 // ACP5 // ACP5 // CD36 // CD36 // CD36 // CD36 // CD36 // CD36 // CD36 // CD36 // HMOX1 // HMOX1 // CCL5 // APOE // APOE // APOE // CD14 // CD14 // CD14 // CD14 // HBB // HCK // CTSH // CTSH // LY96 // LILRB2 // PYCARD // VCAM1 // CCR5 // NCF2 // NCF2 // NCF2 // ABCA1 // CCL2 // BID // PTPN6 // IRF8 // IRF8 // IRF8 // IRF8 // IRF8 // IRF8 // CASP1 // LYN // LYN /…	3.40169e-22
GO:0050727	biological_process	regulation of inflammatory response	6	S100A8 // S100A9 // PLA2G7 // ACP5 // ACP5 // ACP5 // CCL5 // APOE // APOE // APOE // HCK // HLA-DRB1 // FCER1G // LYN // LYN // TLR2 // TLR7 // ALOX5AP // IL18 // FABP4 // OSM // XIAP // FCER1A // CR1 // NR1H3 // NR1H3 // NR1H3 // NR1H3 // NR1H3 // NR1H3 // NR1H3 // NR1H3 // TLR4 // TNFRSF1B // MAPK13 // AOAH // CCR7 // CCR7 // CCR7 // SELE // C2 // SLC7A2 // BIRC3 // CD28 // IL1B // IL1B // IL1…	4.82183e-22
GO:0048522	biological_process	positive regulation of cellular process	4	SPP1 // MMP12 // APOC1 // S100A8 // CHI3L1 // MMP9 // S100A9 // PLA2G7 // CD36 // CD36 // CD36 // CD36 // CD36 // CD36 // CD36 // CD36 // HMOX1 // CCL5 // APOE // APOE // APOE // HLA-DRA // CD14 // CD14 // CD14 // CD14 // HLA-DQB1 // GPR65 // C3AR1 // C3AR1 // HBB // HCK // LPL // LPL // LPL // LPL // CXCR4 // MNDA // CTSH // CTSH // PTPRC // PTPRC // HLA-DPA1 // LILRB2 // PYCARD // VCAM1 // HLA-…	8.11768e-22
GO:0032879	biological_process	regulation of localization	3	APOC1 // MMP9 // PLA2G7 // CD36 // CD36 // CD36 // CD36 // CD36 // CD36 // CD36 // CD36 // VAMP8 // VAMP8 // HMOX1 // HMOX1 // CCL5 // APOE // CD14 // CD14 // CD14 // CD14 // C3AR1 // C3AR1 // GNA13 // GNA13 // HCK // LPL // CXCR4 // CTSH // CTSH // PTPRC // PTPRC // LCP1 // LILRB2 // PYCARD // HLA-DRB1 // HLA-DRB1 // HLA-DRB1 // HLA-DRB1 // HLA-DRB1 // DOCK2 // DOCK2 // CCR5 // ABCA1 // CCL2 // …	1.35677e-21
GO:0065009	biological_process	regulation of molecular function	2	APOC1 // S100A8 // CHI3L1 // S100A9 // HMOX1 // HMOX1 // CCL5 // APOE // GPR65 // GMFG // CSTA // GNA13 // HCK // STMN3 // STMN3 // CXCR4 // CTSH // PTPRC // PTPRC // RGS1 // SERPINA1 // PYCARD // CTSB // CTSB // CTSB // CTSB // CTSB // CTSB // CTSB // CTSB // CTSB // CTSB // CTSB // CTSB // CTSB // CTSB // CCL2 // TIMP2 // TIMP2 // PTPN6 // PTPN6 // PTPN6 // PTPRJ // SYK // CASP1 // RASGRP3 // R…	1.64739e-21
GO:0002479	biological_process	antigen processing and presentation of exogenous peptide antigen via MHC class I, TAP-dependent	6	CD36 // NCF2 // HLA-B // HLA-B // HLA-B // HLA-B // HLA-B // HLA-B // HLA-B // HLA-B // HLA-B // HLA-B // HLA-B // HLA-B // HLA-B // HLA-B // HLA-B // HLA-B // HLA-B // HLA-B // HLA-B // HLA-B // HLA-B // HLA-B // HLA-B // HLA-B // HLA-B // HLA-B // HLA-B // HLA-B // HLA-B // HLA-B // HLA-B // HLA-B // HLA-B // HLA-B // CYBA // NCF4 // PSMB8 // PSMB10 // PSMB9 // CYBB // HLA-E	1.95942e-21
GO:0051241	biological_process	negative regulation of multicellular organismal process	4	APOC1 // ACP5 // ACP5 // ACP5 // HMOX1 // HMOX1 // APOE // PYCARD // HLA-DRB1 // HLA-DRB1 // HLA-DRB1 // HLA-DRB1 // HLA-DRB1 // CCR1 // VSIG4 // LGMN // LGMN // LGMN // LGMN // SRGN // TLR2 // CYBA // GREM1 // PLAUR // NR1H3 // NR1H3 // NR1H3 // NR1H3 // NR1H3 // NR1H3 // NR1H3 // NR1H3 // TLR4 // ARRB2 // ARRB2 // PROCR // STK4 // PLAT // CD83 // PLAU // TNFRSF11B // APOC2 // CSK // CSK // CSK …	2.34303e-21
GO:0061041	biological_process	regulation of wound healing	5	CD36 // CD36 // CD36 // CD36 // CD36 // CD36 // CD36 // CD36 // APOE // PTPRJ // SYK // FCER1G // LYN // LYN // PLEK // PLAUR // TLR4 // PLAT // PDPN // PDPN // PLAU // PDGFRA // ANXA2 // ANXA2 // ANXA2 // ANXA2 // ANXA2 // ANXA2 // ANXA2 // ANXA2 // ANXA2 // ANXA2 // ANXA2 // ANXA2 // ANXA2 // ANXA2 // ANXA2 // ANXA2 // ANXA2 // THBS1 // SERPINE1 // HPSE // TNFAIP3 // F2R	1.48546e-20
GO:0010885	biological_process	regulation of cholesterol storage	5	CD36 // CD36 // CD36 // CD36 // CD36 // CD36 // CD36 // CD36 // LPL // ABCA1 // ABCG1 // NR1H3 // NR1H3 // NR1H3 // NR1H3 // NR1H3 // NR1H3 // NR1H3 // NR1H3 // SCARB1 // MSR1 // MSR1 // PPARG	3.36324e-20
GO:0009605	biological_process	response to external stimulus	2	SPP1 // CCL18 // S100A8 // CHI3L1 // S100A9 // VAMP8 // HMOX1 // HMOX1 // TYROBP // CCL5 // APOE // C3AR1 // C3AR1 // LPL // CXCR4 // PTPRC // ITGB2 // ITGAM // VCAM1 // HLA-DRB1 // HLA-DRB1 // HLA-DRB1 // HLA-DRB1 // HLA-DRB1 // DOCK2 // DOCK2 // CCR5 // CCL2 // FPR3 // CCR1 // KYNU // PTPRJ // SYK // FCER1G // CCL8 // CASP1 // LYN // LYN // TLR1 // TLR1 // TLR1 // HLA-B // IL8 // TLR2 // TLR7 /…	3.49695e-20
GO:0016477	biological_process	cell migration	5	SPP1 // MMP12 // S100A8 // S100A9 // CCL5 // TREM1 // HCK // CXCR4 // PTPRC // MMP1 // ITGB2 // ITGAM // VCAM1 // CCR5 // ITGAX // CCL2 // FPR3 // CCR1 // PTPN6 // SYK // FCER1G // SLC16A3 // LYN // IL8 // HTR2B // C5AR1 // ATP1B1 // CCL19 // CD48 // CXCR2 // CXCR2 // CXCR2 // CXCR2 // CXCR2 // BIN2 // GREM1 // PPBP // CD84 // CD2 // CX3CR1 // CX3CR1 // CX3CR1 // CORO1A // CORO1A // CORO1A // COR…	6.89552e-20
GO:0019048	biological_process	virus-host interaction	5	HCK // CXCR4 // MMP1 // ANPEP // FCGR2B // VCAM1 // CCR5 // SYK // PILRA // LYN // CLEC5A // CD86 // HLA-B // HLA-B // HLA-B // HLA-B // HLA-B // HLA-B // HLA-B // HLA-B // HLA-B // HLA-B // HLA-B // HLA-B // HLA-B // HLA-B // HLA-B // HLA-B // HLA-B // HLA-B // HLA-B // HLA-B // HLA-B // HLA-B // HLA-B // HLA-B // HLA-B // HLA-B // HLA-B // HLA-B // HLA-B // HLA-B // HLA-B // HLA-B // HLA-B // H…	7.40428e-20
GO:0045088	biological_process	regulation of innate immune response	6	CTSS // CD36 // CCL5 // CD14 // HCK // LY96 // PYCARD // ITGB2 // ITGAM // CTSB // PTPN6 // LGMN // CD86 // CD86 // TLR1 // TLR1 // TLR1 // TLR2 // TLR7 // MAP3K1 // XIAP // MARCO // COLEC12 // CR1 // FGR // FGR // NR1H3 // TLR4 // MYO1F // ARRB2 // CTSL1 // CTSK // IFNAR2 // BIRC3 // CD1D // CRTAM // TLR5 // IRAK3 // RPS6KA1 // PLSCR1 // PPARG // IFI16 // MYD88 // MYD88 // MYD88 // MYD88 // MYD8…	1.12293e-19
GO:0050708	biological_process	regulation of protein secretion	7	CD14 // CD14 // CD14 // CD14 // PYCARD // HLA-DRB1 // HLA-DRB1 // HLA-DRB1 // HLA-DRB1 // HLA-DRB1 // SYK // CASP1 // LYN // LYN // CLEC5A // SRGN // TLR1 // TLR1 // TLR1 // HTR2B // TLR2 // CCL19 // CSF1R // FGR // FGR // NR1H3 // NR1H3 // NR1H3 // NR1H3 // NR1H3 // NR1H3 // NR1H3 // NR1H3 // TLR4 // CCR7 // CCR7 // CCR7 // DNAJC1 // CRTAM // TLR5 // RHBDF2 // RHBDF2 // RHBDF2 // RHBDF2 // RHBDF…	1.21114e-19
GO:0050790	biological_process	regulation of catalytic activity	4	APOC1 // S100A8 // CHI3L1 // S100A9 // CCL5 // APOE // GPR65 // GMFG // CSTA // GNA13 // STMN3 // STMN3 // CXCR4 // CTSH // PTPRC // PTPRC // RGS1 // SERPINA1 // PYCARD // CTSB // CTSB // CTSB // CTSB // CTSB // CTSB // CTSB // CTSB // CTSB // CTSB // CTSB // CTSB // CTSB // CTSB // CCL2 // TIMP2 // TIMP2 // PTPN6 // PTPN6 // PTPN6 // PTPRJ // SYK // CASP1 // RASGRP3 // RASGRP3 // RASGRP3 // RASG…	2.12603e-19
GO:0065008	biological_process	regulation of biological quality	2	SPP1 // S100A8 // CD52 // IFI30 // S100A9 // ACP5 // ACP5 // ACP5 // CD36 // HMOX1 // HMOX1 // CCL5 // APOE // APOE // APOE // CP // CP // CP // CP // CP // TREM1 // C3AR1 // GNA13 // GNA13 // HBB // HCK // LPL // CXCR4 // LCP2 // CTSH // CTSH // APBB1IP // PTPRC // PTPRC // MMP1 // ANPEP // CAPG // SERPINA1 // PYCARD // ITGB2 // ITGAM // VCAM1 // CCR5 // ITGAX // NCF2 // NCF2 // NCF2 // ABCA1 //…	3.27626e-19
GO:0032680	biological_process	regulation of tumor necrosis factor production	5	ACP5 // ACP5 // ACP5 // CD36 // CD36 // CD36 // CD36 // CD36 // CD36 // CD36 // CD36 // CD14 // PYCARD // FCER1G // TLR1 // TLR1 // TLR1 // TLR1 // TLR1 // TLR2 // CCL19 // IL18 // TLR4 // ARRB2 // ARRB2 // SASH3 // IRAK3 // THBS1 // MYD88 // MYD88 // TNFAIP3 // TNFAIP3 // TNFAIP3 // TNFAIP3 // IL10 // PF4 // CCR2	3.90132e-19
GO:0030100	biological_process	regulation of endocytosis	6	APOC1 // CD36 // CD36 // CD36 // CD36 // CD36 // CD36 // CD36 // CD36 // VAMP8 // VAMP8 // CD14 // CD14 // CD14 // CD14 // HCK // PYCARD // DOCK2 // DOCK2 // CCL2 // SYK // FCER1G // SCYL2 // DAB2 // DAB2 // DAB2 // DAB2 // CCL19 // GREM1 // FGR // FGR // NR1H3 // ARRB2 // ARRB2 // SCARB1 // SELE // APOC2 // CSK // CSK // CSK // CSK // ABL2 // SLC11A1 // NCKAP1L // CBLL1 // CBLL1 // PTX3 // SERPI…	5.73913e-19
GO:0030334	biological_process	regulation of cell migration	6	MMP9 // PLA2G7 // HMOX1 // CCL5 // APOE // C3AR1 // C3AR1 // GNA13 // GNA13 // CXCR4 // CTSH // CTSH // PTPRC // PYCARD // CCL2 // CCR1 // PTPRJ // LYN // LYN // AIF1 // IL8 // TLR2 // SGK1 // DAB2 // DAB2 // DAB2 // DAB2 // CCL19 // GREM1 // MAP3K1 // CSF1R // CSF1R // FGR // FGR // CX3CR1 // CX3CR1 // CX3CR1 // CORO1A // CORO1A // CORO1A // CORO1A // CCL7 // MYO1F // SCARB1 // S1PR1 // CCR7 // …	8.12241e-19
GO:0045089	biological_process	positive regulation of innate immune response	7	CTSS // CD36 // CCL5 // CD14 // HCK // LY96 // PYCARD // ITGB2 // ITGAM // CTSB // LGMN // CD86 // CD86 // TLR1 // TLR1 // TLR1 // TLR2 // TLR7 // MAP3K1 // MARCO // COLEC12 // TLR4 // CTSL1 // CTSK // BIRC3 // CD1D // CRTAM // TLR5 // IRAK3 // RPS6KA1 // PLSCR1 // IFI16 // MYD88 // MYD88 // MYD88 // MYD88 // MYD88 // TLR8 // TLR8 // TNFAIP3 // MAPKAPK3 // MAPKAPK3 // MAPKAPK3 // CADM1 // CADM1 /…	2.36451e-18
GO:0040017	biological_process	positive regulation of locomotion	4	MMP9 // PLA2G7 // CCL5 // C3AR1 // C3AR1 // CTSH // CTSH // PTPRC // PYCARD // CCL2 // CCR1 // PTPRJ // LYN // LYN // AIF1 // IL8 // IL8 // TLR2 // DAB2 // DAB2 // DAB2 // DAB2 // CCL19 // CSF1R // CSF1R // FGR // FGR // CORO1A // CORO1A // CORO1A // CORO1A // CCL7 // MYO1F // SCARB1 // S1PR1 // CCR7 // CCR7 // CCR7 // PDPN // PDPN // LAMB1 // SCG2 // SELE // CCL4 // NRP2 // COL1A1 // CXCL10 // F…	3.47381e-18
GO:0030335	biological_process	positive regulation of cell migration	7	MMP9 // PLA2G7 // CCL5 // C3AR1 // C3AR1 // CTSH // CTSH // PTPRC // PYCARD // CCL2 // CCR1 // PTPRJ // LYN // LYN // AIF1 // IL8 // TLR2 // DAB2 // DAB2 // DAB2 // DAB2 // CCL19 // CSF1R // CSF1R // FGR // FGR // CORO1A // CORO1A // CORO1A // CORO1A // CCL7 // MYO1F // SCARB1 // S1PR1 // CCR7 // CCR7 // CCR7 // PDPN // PDPN // LAMB1 // SELE // CCL4 // NRP2 // COL1A1 // CXCL10 // FLT1 // PODXL //…	3.59922e-18
GO:0042742	biological_process	defense response to bacterium	5	S100A8 // S100A9 // ACP5 // ACP5 // ACP5 // CD36 // CD36 // CD36 // CD36 // CD36 // CD36 // CD36 // CD36 // LYZ // HCK // PYCARD // MMP7 // SYK // FCER1G // IRF8 // IRF8 // IRF8 // IRF8 // IRF8 // IRF8 // HAMP // TLR2 // C5AR1 // PPBP // FGR // FGR // TLR4 // MYO1F // STAB1 // SLC11A1 // ISG15 // TLR5 // CD4 // CD4 // SERPINE1 // MYD88 // MYD88 // MYD88 // P2RX7 // P2RX7 // IL10 // S100A12 // CFP	4.5522e-18
GO:2000145	biological_process	regulation of cell motility	5	MMP9 // PLA2G7 // HMOX1 // CCL5 // APOE // C3AR1 // C3AR1 // GNA13 // GNA13 // CXCR4 // CTSH // CTSH // PTPRC // PYCARD // CCL2 // CCR1 // PTPRJ // LYN // LYN // AIF1 // IL8 // TLR2 // SGK1 // DAB2 // DAB2 // DAB2 // DAB2 // CCL19 // GREM1 // MAP3K1 // CSF1R // CSF1R // FGR // FGR // CX3CR1 // CX3CR1 // CX3CR1 // CORO1A // CORO1A // CORO1A // CORO1A // CCL7 // MYO1F // SCARB1 // S1PR1 // CCR7 // …	4.88505e-18
GO:0002474	biological_process	antigen processing and presentation of peptide antigen via MHC class I	4	IFI30 // CTSS // CD36 // NCF2 // FCER1G // HLA-B // HLA-B // HLA-B // HLA-B // HLA-B // HLA-B // HLA-B // HLA-B // HLA-B // HLA-B // HLA-B // HLA-B // HLA-B // HLA-B // HLA-B // HLA-B // HLA-B // HLA-B // HLA-B // HLA-B // HLA-B // HLA-B // HLA-B // HLA-B // HLA-B // HLA-B // HLA-B // HLA-B // HLA-B // HLA-B // HLA-B // HLA-B // HLA-B // HLA-B // HLA-B // CYBA // NCF4 // PSMB8 // PSMB10 // PSMB9 …	7.40091e-18
GO:0050852	biological_process	T cell receptor signaling pathway	10	HLA-DRA // HLA-DQB1 // LCP2 // PTPRC // PTPRC // PTPRC // PTPRC // PTPRC // PTPRC // PTPRC // HLA-DPA1 // HLA-DRB1 // HLA-DRB1 // HLA-DRB1 // HLA-DRB1 // HLA-DRB1 // HLA-DRB1 // HLA-DRB1 // HLA-DRB1 // HLA-DRB1 // HLA-DRB1 // HLA-DRB1 // HLA-DRB1 // HLA-DRB1 // HLA-DQA1 // CD3D // HLA-DPB1 // FYB // PAK1 // PLCG2 // PLCG2 // ITK // CSK // TRAC // CD4 // LCK // PTPN22 // PTPN22 // WAS	8.18286e-18
GO:0050707	biological_process	regulation of cytokine secretion	8	CD14 // CD14 // CD14 // CD14 // PYCARD // HLA-DRB1 // HLA-DRB1 // HLA-DRB1 // HLA-DRB1 // HLA-DRB1 // SYK // CASP1 // LYN // LYN // CLEC5A // SRGN // TLR1 // TLR1 // TLR1 // HTR2B // TLR2 // CCL19 // CSF1R // FGR // FGR // TLR4 // CCR7 // CCR7 // CCR7 // CRTAM // TLR5 // MIF // P2RX7 // P2RX7 // TLR8 // TLR8 // IL10 // CADM1 // F2R	8.18286e-18
GO:2000147	biological_process	positive regulation of cell motility	6	MMP9 // PLA2G7 // CCL5 // C3AR1 // C3AR1 // CTSH // CTSH // PTPRC // PYCARD // CCL2 // CCR1 // PTPRJ // LYN // LYN // AIF1 // IL8 // TLR2 // DAB2 // DAB2 // DAB2 // DAB2 // CCL19 // CSF1R // CSF1R // FGR // FGR // CORO1A // CORO1A // CORO1A // CORO1A // CCL7 // MYO1F // SCARB1 // S1PR1 // CCR7 // CCR7 // CCR7 // PDPN // PDPN // LAMB1 // SELE // CCL4 // NRP2 // COL1A1 // CXCL10 // FLT1 // PODXL //…	9.26861e-18
GO:0051272	biological_process	positive regulation of cellular component movement	5	MMP9 // PLA2G7 // CCL5 // C3AR1 // C3AR1 // CTSH // CTSH // PTPRC // PYCARD // CCL2 // CCR1 // PTPRJ // LYN // LYN // AIF1 // IL8 // TLR2 // DAB2 // DAB2 // DAB2 // DAB2 // CCL19 // CSF1R // CSF1R // FGR // FGR // CORO1A // CORO1A // CORO1A // CORO1A // CCL7 // MYO1F // SCARB1 // S1PR1 // CCR7 // CCR7 // CCR7 // PDPN // PDPN // LAMB1 // SELE // CCL4 // NRP2 // COL1A1 // CXCL10 // FLT1 // PODXL //…	1.04115e-17
GO:0070663	biological_process	regulation of leukocyte proliferation	5	CCL5 // MNDA // PTPRC // PTPRC // LILRB2 // PYCARD // VCAM1 // HLA-DRB1 // HLA-DRB1 // HLA-DRB1 // HLA-DRB1 // HLA-DRB1 // VSIG4 // PTPN6 // PTPN6 // PTPN6 // SYK // LYN // LYN // AIF1 // CCL19 // GREM1 // IL18 // LST1 // TLR4 // CORO1A // CORO1A // CORO1A // CORO1A // SASH3 // GPR183 // CD28 // CD28 // IL1B // CD1D // ITGAL // ITGAL // ITGAL // NCKAP1L // CD80 // PNP // MYD88 // MYD88 // IGF1 //…	1.11357e-17
GO:0030593	biological_process	neutrophil chemotaxis	8	SPP1 // S100A8 // S100A9 // ITGB2 // ITGAM // CCL2 // SYK // FCER1G // IL8 // C5AR1 // CXCR2 // CXCR2 // CXCR2 // CXCR2 // CXCR2 // PPBP // IL1B // IL1B // IL1B // IL1B // CKLF // CXCL3 // NCKAP1L // CSF3R // CSF3R // S100A12	1.52111e-17
GO:0051270	biological_process	regulation of cellular component movement	4	MMP9 // PLA2G7 // HMOX1 // CCL5 // APOE // C3AR1 // C3AR1 // GNA13 // GNA13 // CXCR4 // CTSH // CTSH // PTPRC // PYCARD // CCL2 // CCR1 // PTPRJ // LYN // LYN // AIF1 // IL8 // TLR2 // SGK1 // DAB2 // DAB2 // DAB2 // DAB2 // CCL19 // GREM1 // MAP3K1 // CSF1R // CSF1R // FGR // FGR // CX3CR1 // CX3CR1 // CX3CR1 // CORO1A // CORO1A // CORO1A // CORO1A // CCL7 // MYO1F // SCARB1 // S1PR1 // CCR7 // …	1.59489e-17
GO:0002685	biological_process	regulation of leukocyte migration	7	PLA2G7 // HMOX1 // CCL5 // C3AR1 // C3AR1 // PYCARD // CCL2 // CCR1 // PTPRJ // LYN // AIF1 // IL8 // TLR2 // CCL19 // GREM1 // CCL7 // CCR7 // CCR7 // CCR7 // SELE // CCL4 // CXCL10 // NCKAP1L // THBS1 // CXCL12 // SERPINE1 // ECM1 // ICAM1 // MPP1 // MPP1 // CAMK1D // VEGFC // STK10 // CCR2 // CCR2	2.36186e-17
GO:0051223	biological_process	regulation of protein transport	6	CD36 // CD36 // CD36 // CD36 // CD36 // CD36 // CD36 // CD36 // CD14 // CD14 // CD14 // CD14 // LCP1 // PYCARD // HLA-DRB1 // HLA-DRB1 // HLA-DRB1 // HLA-DRB1 // HLA-DRB1 // HCLS1 // SYK // CASP1 // LYN // LYN // CLEC5A // SRGN // TLR1 // TLR1 // TLR1 // HTR2B // TLR2 // TLR7 // DAB2 // CCL19 // GREM1 // CSF1R // FGR // FGR // NR1H3 // NR1H3 // NR1H3 // NR1H3 // NR1H3 // NR1H3 // NR1H3 // NR1H3 /…	3.0761e-17
GO:0042127	biological_process	regulation of cell proliferation	4	MMP12 // IFI30 // HMOX1 // HMOX1 // CCL5 // APOE // HCK // MNDA // CTSH // CTSH // PTPRC // PTPRC // LILRB2 // PYCARD // MMP7 // VCAM1 // HLA-DRB1 // HLA-DRB1 // HLA-DRB1 // HLA-DRB1 // HLA-DRB1 // CCL2 // TIMP2 // TIMP2 // BID // VSIG4 // PTPN6 // PTPN6 // PTPN6 // PTPRJ // HCLS1 // SYK // LYN // LYN // CD86 // AIF1 // IL8 // HTR2B // SGK1 // C5AR1 // CCL19 // CYBA // CXCR2 // RAC2 // RAC2 // RA…	4.19494e-17
GO:0048870	biological_process	cell motility	4	SPP1 // MMP12 // S100A8 // S100A9 // CCL5 // TREM1 // HCK // CXCR4 // PTPRC // MMP1 // ITGB2 // ITGAM // VCAM1 // CCR5 // ITGAX // CCL2 // FPR3 // CCR1 // PTPN6 // SYK // FCER1G // PLTP // SLC16A3 // LYN // IL8 // HTR2B // C5AR1 // ATP1B1 // CCL19 // CD48 // CXCR2 // CXCR2 // CXCR2 // CXCR2 // CXCR2 // BIN2 // GREM1 // PPBP // CD84 // CD2 // CX3CR1 // CX3CR1 // CX3CR1 // CORO1A // CORO1A // CORO1…	4.22083e-17
GO:0051674	biological_process	localization of cell	2	SPP1 // MMP12 // S100A8 // S100A9 // CCL5 // TREM1 // HCK // CXCR4 // PTPRC // MMP1 // ITGB2 // ITGAM // VCAM1 // CCR5 // ITGAX // CCL2 // FPR3 // CCR1 // PTPN6 // SYK // FCER1G // PLTP // SLC16A3 // LYN // IL8 // HTR2B // C5AR1 // ATP1B1 // CCL19 // CD48 // CXCR2 // CXCR2 // CXCR2 // CXCR2 // CXCR2 // BIN2 // GREM1 // PPBP // CD84 // CD2 // CX3CR1 // CX3CR1 // CX3CR1 // CORO1A // CORO1A // CORO1…	4.22083e-17
GO:0050793	biological_process	regulation of developmental process	3	SPP1 // CHI3L1 // CD36 // CD36 // CD36 // CD36 // CD36 // CD36 // CD36 // CD36 // HMOX1 // HMOX1 // APOE // APOE // APOE // C3AR1 // C3AR1 // GNA13 // GNA13 // HCK // LPL // LPL // LPL // LPL // CXCR4 // TMEM176B // CTSH // CTSH // PTPRC // PTPRC // LILRB2 // ITGB2 // LILRB4 // ABCA1 // CCL2 // TIMP2 // TIMP2 // CCR1 // PTPN6 // PTPN6 // PTPN6 // HCLS1 // SYK // HLA-DMA // HLA-DMA // ABCG1 // LYN…	7.55442e-17
GO:0050670	biological_process	regulation of lymphocyte proliferation	7	CCL5 // MNDA // PTPRC // PTPRC // LILRB2 // PYCARD // VCAM1 // HLA-DRB1 // HLA-DRB1 // HLA-DRB1 // HLA-DRB1 // HLA-DRB1 // VSIG4 // PTPN6 // PTPN6 // PTPN6 // SYK // LYN // LYN // AIF1 // CCL19 // IL18 // LST1 // TLR4 // CORO1A // CORO1A // CORO1A // CORO1A // SASH3 // GPR183 // CD28 // CD28 // IL1B // CD1D // ITGAL // ITGAL // ITGAL // NCKAP1L // CD80 // PNP // MYD88 // MYD88 // IGF1 // IL12RB1 …	9.14704e-17
GO:0040012	biological_process	regulation of locomotion	3	MMP9 // PLA2G7 // HMOX1 // CCL5 // APOE // C3AR1 // C3AR1 // GNA13 // GNA13 // CXCR4 // CTSH // CTSH // PTPRC // PYCARD // CCL2 // CCR1 // PTPRJ // LYN // LYN // AIF1 // IL8 // IL8 // TLR2 // SGK1 // DAB2 // DAB2 // DAB2 // DAB2 // CCL19 // GREM1 // MAP3K1 // CSF1R // CSF1R // FGR // FGR // CX3CR1 // CX3CR1 // CX3CR1 // CORO1A // CORO1A // CORO1A // CORO1A // CCL7 // MYO1F // SCARB1 // S1PR1 // C…	1.09241e-16
GO:0032944	biological_process	regulation of mononuclear cell proliferation	6	CCL5 // MNDA // PTPRC // PTPRC // LILRB2 // PYCARD // VCAM1 // HLA-DRB1 // HLA-DRB1 // HLA-DRB1 // HLA-DRB1 // HLA-DRB1 // VSIG4 // PTPN6 // PTPN6 // PTPN6 // SYK // LYN // LYN // AIF1 // CCL19 // IL18 // LST1 // TLR4 // CORO1A // CORO1A // CORO1A // CORO1A // SASH3 // GPR183 // CD28 // CD28 // IL1B // CD1D // ITGAL // ITGAL // ITGAL // NCKAP1L // CD80 // PNP // MYD88 // MYD88 // IGF1 // IL12RB1 …	1.12233e-16
GO:0032655	biological_process	regulation of interleukin-12 production	5	ACP5 // ACP5 // ACP5 // CD36 // CD36 // CD36 // CD36 // CD36 // CD36 // CD36 // CD36 // IRF8 // IRF8 // IRF8 // IRF8 // IRF8 // IRF8 // HLA-B // TLR2 // CCL19 // TLR4 // ARRB2 // ARRB2 // CCR7 // CCR7 // CCR7 // IRAK3 // THBS1 // JAK3 // IL10	1.16815e-16
GO:0030003	biological_process	cellular cation homeostasis	7	S100A8 // CD52 // S100A9 // HMOX1 // CCL5 // APOE // APOE // APOE // CP // CP // CP // CP // CP // C3AR1 // CXCR4 // PTPRC // PTPRC // CCR5 // CCL2 // CCR1 // CCL8 // HAMP // GNA15 // HTR2B // C5AR1 // CCL19 // CXCR2 // CXCR2 // CXCR2 // CXCR2 // CXCR2 // ATP6V1F // CX3CR1 // CX3CR1 // CX3CR1 // PLCG2 // PLCG2 // CCL7 // S1PR1 // CCR7 // CCR7 // CCR7 // IREB2 // IREB2 // SCO2 // HEXB // HEXB // H…	2.00125e-16
GO:0042730	biological_process	fibrinolysis	8	PLAUR // PLAT // PLAU // ANXA2 // ANXA2 // ANXA2 // ANXA2 // ANXA2 // ANXA2 // ANXA2 // ANXA2 // ANXA2 // ANXA2 // ANXA2 // ANXA2 // ANXA2 // ANXA2 // ANXA2 // ANXA2 // ANXA2 // SERPINE1	2.44202e-16
GO:0002218	biological_process	activation of innate immune response	8	CTSS // CD36 // CD14 // HCK // LY96 // PYCARD // ITGB2 // ITGAM // CTSB // LGMN // CD86 // CD86 // TLR1 // TLR1 // TLR1 // TLR2 // TLR7 // MAP3K1 // MARCO // COLEC12 // TLR4 // CTSL1 // CTSK // BIRC3 // TLR5 // IRAK3 // RPS6KA1 // IFI16 // MYD88 // MYD88 // MYD88 // MYD88 // MYD88 // TLR8 // TLR8 // TNFAIP3 // MAPKAPK3 // MAPKAPK3 // MAPKAPK3 // DDX58 // CDK1 // DUSP4 // DUSP6 // BTK	2.69488e-16
GO:0070201	biological_process	regulation of establishment of protein localization	5	CD36 // CD36 // CD36 // CD36 // CD36 // CD36 // CD36 // CD36 // CD14 // CD14 // CD14 // CD14 // LCP1 // PYCARD // HLA-DRB1 // HLA-DRB1 // HLA-DRB1 // HLA-DRB1 // HLA-DRB1 // BID // HCLS1 // SYK // CASP1 // LYN // LYN // CLEC5A // SRGN // TLR1 // TLR1 // TLR1 // HTR2B // TLR2 // TLR7 // DAB2 // CCL19 // GREM1 // CSF1R // GZMB // FGR // FGR // NR1H3 // NR1H3 // NR1H3 // NR1H3 // NR1H3 // NR1H3 // N…	3.79109e-16
GO:0032103	biological_process	positive regulation of response to external stimulus	5	S100A8 // S100A9 // PLA2G7 // CCL5 // C3AR1 // C3AR1 // CCL2 // CCR1 // PTPRJ // FCER1G // AIF1 // IL8 // IL8 // TLR2 // TLR7 // CCL19 // ALOX5AP // IL18 // FABP4 // OSM // FCER1A // TLR4 // CCL7 // MAPK13 // S1PR1 // CCR7 // CCR7 // CCR7 // SCG2 // CCL4 // CD28 // SCARF1 // IL1B // IL1B // IL1B // IL1B // CXCL10 // CYP27B1 // NCKAP1L // THBS1 // CXCL12 // SERPINE1 // CAMK1D // TGFB1 // VEGFC // …	4.03469e-16
GO:0002758	biological_process	innate immune response-activating signal transduction	9	CTSS // CD36 // CD14 // HCK // LY96 // ITGB2 // ITGAM // CTSB // LGMN // CD86 // CD86 // TLR1 // TLR1 // TLR1 // TLR2 // TLR7 // MAP3K1 // MARCO // COLEC12 // TLR4 // CTSL1 // CTSK // BIRC3 // TLR5 // IRAK3 // RPS6KA1 // MYD88 // MYD88 // MYD88 // MYD88 // MYD88 // TLR8 // TLR8 // TNFAIP3 // MAPKAPK3 // MAPKAPK3 // MAPKAPK3 // DDX58 // CDK1 // DUSP4 // DUSP6 // BTK	4.30093e-16
GO:0009615	biological_process	response to virus	4	CCL5 // CXCR4 // PTPRC // PTPRC // PYCARD // ITGAX // CCL8 // CLEC5A // CD86 // CD86 // OAS1 // OAS1 // OAS1 // OAS1 // OAS1 // OAS1 // OAS1 // TLR7 // CCL19 // NPC2 // DNAJC3 // FGR // APOBEC3G // IFNAR2 // OAS3 // OAS3 // OAS3 // OAS3 // OAS3 // MX1 // IFI44L // CCL4 // BCL2L11 // BCL2L11 // BCL2L11 // DDIT4 // CXCL10 // CD8A // APOBEC3B // ISG15 // IRAK3 // CXCL12 // PLSCR1 // IFI44 // APOBEC3…	5.6478e-16
GO:0055080	biological_process	cation homeostasis	6	S100A8 // CD52 // S100A9 // HMOX1 // CCL5 // APOE // APOE // APOE // CP // CP // CP // CP // CP // C3AR1 // CXCR4 // PTPRC // PTPRC // CCR5 // CCL2 // STEAP4 // CCR1 // CCL8 // HAMP // GNA15 // HTR2B // C5AR1 // CCL19 // CXCR2 // CXCR2 // CXCR2 // CXCR2 // CXCR2 // ATP6V1F // XIAP // CX3CR1 // CX3CR1 // CX3CR1 // PLCG2 // PLCG2 // SOD2 // SOD2 // SOD2 // CCL7 // S1PR1 // CCR7 // CCR7 // CCR7 // I…	6.9948e-16
GO:0006875	biological_process	cellular metal ion homeostasis	8	CD52 // HMOX1 // CCL5 // APOE // APOE // APOE // CP // CP // CP // CP // CP // C3AR1 // CXCR4 // PTPRC // PTPRC // CCR5 // CCL2 // CCR1 // CCL8 // HAMP // GNA15 // HTR2B // C5AR1 // CCL19 // CXCR2 // CXCR2 // CXCR2 // CXCR2 // CXCR2 // ATP6V1F // CX3CR1 // CX3CR1 // CX3CR1 // PLCG2 // PLCG2 // CCL7 // S1PR1 // CCR7 // CCR7 // CCR7 // IREB2 // IREB2 // HEXB // HEXB // HEXB // ADM // ADM // SLC11A1…	9.89468e-16
GO:0002221	biological_process	pattern recognition receptor signaling pathway	10	CTSS // CD36 // CD14 // LY96 // ITGB2 // ITGAM // CTSB // LGMN // CD86 // CD86 // TLR1 // TLR1 // TLR1 // TLR2 // TLR7 // MAP3K1 // MARCO // COLEC12 // TLR4 // CTSL1 // CTSK // BIRC3 // TLR5 // IRAK3 // RPS6KA1 // MYD88 // MYD88 // MYD88 // MYD88 // MYD88 // TLR8 // TLR8 // TNFAIP3 // MAPKAPK3 // MAPKAPK3 // MAPKAPK3 // DDX58 // CDK1 // DUSP4 // DUSP6 // BTK	1.00877e-15
GO:0007159	biological_process	leukocyte cell-cell adhesion	5	S100A8 // S100A9 // CCL5 // PTPRC // PTPRC // ITGB2 // ITGAM // VCAM1 // SYK // SELE // IL1B // ITGA4 // ITGA4 // SELPLG // ITGAL // ITGAL // ITGAL // OLR1 // OLR1 // OLR1 // OLR1 // OLR1 // OLR1 // ICAM1 // STK10	1.38778e-15
GO:0001819	biological_process	positive regulation of cytokine production	5	CD36 // CD36 // CD36 // CD36 // CD36 // CD36 // CD36 // CD36 // CD14 // C3AR1 // C3AR1 // LILRB2 // PYCARD // FCER1G // IRF8 // IRF8 // IRF8 // IRF8 // IRF8 // IRF8 // CASP1 // HTR2B // TLR2 // TLR7 // CCL19 // IL18 // CSF1R // TLR4 // MAPK13 // CCR7 // CCR7 // CCR7 // SASH3 // CD83 // IL1B // IL1B // IL1B // IL1B // SLC11A1 // TLR5 // THBS1 // IFI16 // SERPINE1 // MYD88 // MYD88 // MYD88 // IL12…	1.51371e-15
GO:0001816	biological_process	cytokine production	3	S100A8 // CHI3L1 // S100A9 // LCP2 // ABCA1 // LIPA // LIPA // LIPA // CASP1 // LYN // LYN // CCL19 // IL18 // FABP4 // TLR4 // CCR7 // CCR7 // CCR7 // ITK // ITK // BTN3A2 // CD28 // IL1B // IL1B // IL1B // IL1B // SLC11A1 // MAF // RUNX3 // PNP // BATF // PTAFR // CD4 // CD4 // MYD88 // MYD88 // S100A12 // HIF1A	1.54316e-15
GO:0002274	biological_process	myeloid leukocyte activation	5	TYROBP // CCL5 // CXCR4 // LCP2 // PYCARD // DOCK2 // DOCK2 // SYK // FCER1G // LYN // LYN // TLR1 // AIF1 // IL8 // IL8 // TLR7 // CD48 // CXCR2 // PPBP // CX3CR1 // CX3CR1 // CX3CR1 // TLR4 // MYO1F // SPI1 // SLC7A2 // SLC11A1 // LAT2 // BATF // UBD // CD93 // TGFB1 // S100A12 // STXBP2	1.5905e-15
GO:0043901	biological_process	negative regulation of multi-organism process	4	CD36 // CD36 // CD36 // CD36 // CD36 // CD36 // CD36 // CD36 // CCL5 // IRF8 // IRF8 // IRF8 // IRF8 // IRF8 // IRF8 // OAS1 // TLR2 // APOBEC3G // OAS3 // MX1 // ISG15 // PLSCR1 // APOBEC3C // IFI16 // MYD88 // MYD88 // IFITM1 // MICB // IL10	1.95008e-15
GO:0002688	biological_process	regulation of leukocyte chemotaxis	8	PLA2G7 // CCL5 // C3AR1 // C3AR1 // CCL2 // CCR1 // PTPRJ // LYN // AIF1 // IL8 // CCL19 // GREM1 // CCL7 // CCR7 // CCR7 // CCR7 // CCL4 // CXCL10 // NCKAP1L // THBS1 // CXCL12 // SERPINE1 // MPP1 // MPP1 // CAMK1D // VEGFC // CCR2 // CCR2	2.55957e-15
GO:0002521	biological_process	leukocyte differentiation	8	MMP9 // PTPRC // PTPRC // SNX10 // VCAM1 // DOCK2 // DOCK2 // SYK // HLA-DMA // HLA-DMA // CD3D // LYN // LYN // CCL19 // IL7R // IL7R // IL7R // CSF1R // CSF1R // PLCG2 // PLCG2 // CCR7 // CCR7 // CCR7 // GPR183 // ITK // ITK // CEBPA // SPI1 // IREB2 // IREB2 // BLNK // CD28 // IKZF1 // ITGA4 // CD1D // CD8A // HHEX // HHEX // LYL1 // LYL1 // PPARG // IFI16 // TFRC // TFRC // TFRC // BATF // CD…	2.67632e-15
GO:0006508	biological_process	proteolysis	5	MMP12 // MMP9 // CTSS // ADAMDEC1 // CPVL // CPVL // CPVL // CPVL // CPVL // CPVL // CTSH // CTSH // MMP1 // CPM // CPM // CPM // CPM // ANPEP // ANPEP // ANPEP // ANPEP // ANPEP // PYCARD // PYCARD // MMP7 // CTSB // CTSB // CTSB // CTSB // CTSB // CTSB // CTSB // CTSB // LGMN // LGMN // LGMN // LGMN // LGMN // LGMN // LGMN // LGMN // LGMN // LGMN // LGMN // CTSZ // DPEP2 // DPEP2 // DPEP2 // DP…	2.87636e-15
GO:0060627	biological_process	regulation of vesicle-mediated transport	5	APOC1 // CD36 // CD36 // CD36 // CD36 // CD36 // CD36 // CD36 // CD36 // VAMP8 // VAMP8 // HMOX1 // HMOX1 // CD14 // CD14 // CD14 // CD14 // HCK // PYCARD // DOCK2 // DOCK2 // CCL2 // SYK // FCER1G // SCYL2 // LYN // LYN // DAB2 // DAB2 // DAB2 // DAB2 // CCL19 // RALA // RALA // GREM1 // FCER1A // FGR // FGR // NR1H3 // ARRB2 // ARRB2 // SCARB1 // SELE // APOC2 // CSK // CSK // CSK // CSK // ABL…	3.33181e-15
GO:0055065	biological_process	metal ion homeostasis	7	CD52 // HMOX1 // CCL5 // APOE // APOE // APOE // CP // CP // CP // CP // CP // C3AR1 // CXCR4 // PTPRC // PTPRC // CCR5 // CCL2 // CCR1 // CCL8 // HAMP // GNA15 // HTR2B // C5AR1 // CCL19 // CXCR2 // CXCR2 // CXCR2 // CXCR2 // CXCR2 // ATP6V1F // CX3CR1 // CX3CR1 // CX3CR1 // PLCG2 // PLCG2 // CCL7 // S1PR1 // CCR7 // CCR7 // CCR7 // IREB2 // IREB2 // HEXB // HEXB // HEXB // ADM // ADM // CYP27B1…	4.70452e-15
GO:0048534	biological_process	hematopoietic or lymphoid organ development	6	MMP9 // PTPRC // PTPRC // SNX10 // VCAM1 // DOCK2 // DOCK2 // HCLS1 // SYK // HLA-DMA // HLA-DMA // IRF8 // IRF8 // IRF8 // IRF8 // IRF8 // IRF8 // CD3D // LYN // LYN // PLEK // DAB2 // DAB2 // DAB2 // DAB2 // CCL19 // IL7R // IL7R // IL7R // CSF1R // CSF1R // PLCG2 // PLCG2 // SOD2 // SOD2 // SOD2 // STK4 // CCR7 // CCR7 // CCR7 // GPR183 // ITK // ITK // CEBPA // SPI1 // IREB2 // IREB2 // LMO2 …	5.89489e-15
GO:0046649	biological_process	lymphocyte activation	5	CXCR4 // PTPRC // PTPRC // LCP1 // ITGAM // VCAM1 // DOCK2 // DOCK2 // SYK // HLA-DMA // HLA-DMA // CD3D // CD86 // CD86 // SLAMF7 // CCL19 // CD48 // IL7R // IL7R // IL7R // CD2 // PLCG2 // PLCG2 // DPP4 // CCR7 // CCR7 // CCR7 // GPR183 // ITK // ITK // SPI1 // PSMB10 // BLNK // CD28 // IKZF1 // ITGA4 // CD1D // CRTAM // CD8A // SLC11A1 // HHEX // HHEX // ITGAL // ITGAL // ITGAL // LYL1 // LYL1…	6.37509e-15
GO:0035556	biological_process	intracellular signal transduction	5	CHI3L1 // CD36 // HMOX1 // HMOX1 // TYROBP // CCL5 // APOE // CD14 // TREM1 // GNA13 // GNA13 // CXCR4 // CTSH // LY96 // PYCARD // DOCK2 // DOCK2 // DOCK2 // DOCK2 // DOCK2 // DOCK2 // CCR5 // CCL2 // BID // PTPN6 // PTPN6 // PTPN6 // HCLS1 // IQGAP2 // IQGAP2 // IQGAP2 // IQGAP2 // SYK // ZBTB33 // ARL4C // RASGRP3 // RASGRP3 // RASGRP3 // RASGRP3 // RASGRP3 // RASGRP3 // RASGRP3 // LYN // LYN …	7.37575e-15
GO:0001944	biological_process	vasculature development	7	HMOX1 // HMOX1 // APOE // APOE // APOE // GNA13 // GNA13 // CXCR4 // ANPEP // CCL2 // PTPRJ // SYK // IL8 // GREM1 // IL18 // TYMP // PECAM1 // S1PR1 // SAT1 // STK4 // PDPN // PDPN // SCG2 // SCG2 // SCG2 // SPI1 // CYP1B1 // NRP2 // NRP2 // NRP2 // NRP2 // PLXDC1 // COL1A1 // FLT1 // ADM // ADM // PRKX // ZMIZ1 // HHEX // HHEX // LYL1 // PDGFRA // PDGFRA // PDGFRA // PDGFRA // ANXA2 // ANXA2 //…	9.08312e-15
GO:0045807	biological_process	positive regulation of endocytosis	7	CD36 // CD36 // CD36 // CD36 // CD36 // CD36 // CD36 // CD36 // CD14 // CD14 // CD14 // CD14 // PYCARD // DOCK2 // DOCK2 // CCL2 // FCER1G // SCYL2 // DAB2 // DAB2 // DAB2 // DAB2 // CCL19 // GREM1 // ARRB2 // ARRB2 // SELE // SLC11A1 // NCKAP1L // CBLL1 // CBLL1 // PTX3 // SERPINE1 // CAMK1D // PPT1	1.06191e-14
GO:0071396	biological_process	cellular response to lipid	6	CD36 // CD36 // CD36 // CD36 // CD36 // CD36 // CD36 // CD36 // CCL5 // APOE // APOE // APOE // CD14 // HCK // LY96 // LILRB2 // PYCARD // CCR5 // ABCA1 // CCL2 // IRF8 // IRF8 // IRF8 // IRF8 // IRF8 // IRF8 // LYN // LYN // IL8 // IL8 // TLR2 // IL18 // CX3CR1 // CX3CR1 // CX3CR1 // NR1H3 // NR1H3 // NR1H3 // NR1H3 // NR1H3 // NR1H3 // NR1H3 // NR1H3 // AKR1C3 // TLR4 // SCARB1 // TNFRSF1B // N…	1.31734e-14
GO:0002687	biological_process	positive regulation of leukocyte migration	8	PLA2G7 // CCL5 // C3AR1 // C3AR1 // PYCARD // CCL2 // CCR1 // PTPRJ // AIF1 // IL8 // TLR2 // CCL19 // CCL7 // CCR7 // CCR7 // CCR7 // SELE // CCL4 // CXCL10 // NCKAP1L // THBS1 // CXCL12 // SERPINE1 // ICAM1 // CAMK1D // VEGFC // CCR2 // CCR2	1.32145e-14
GO:0042129	biological_process	regulation of T cell proliferation	8	CCL5 // PTPRC // PTPRC // LILRB2 // PYCARD // VCAM1 // HLA-DRB1 // HLA-DRB1 // HLA-DRB1 // HLA-DRB1 // HLA-DRB1 // VSIG4 // PTPN6 // PTPN6 // PTPN6 // SYK // AIF1 // CCL19 // IL18 // CORO1A // CORO1A // CORO1A // CORO1A // SASH3 // CD28 // CD28 // IL1B // CD1D // ITGAL // ITGAL // ITGAL // NCKAP1L // CD80 // PNP // IGF1 // IL12RB1 // CDKN2A // IL10 // TGFB1 // CCR2	1.59036e-14
GO:0002429	biological_process	immune response-activating cell surface receptor signaling pathway	8	IGKC // HLA-DRA // HLA-DQB1 // HCK // LCP2 // MNDA // PTPRC // PTPRC // PTPRC // PTPRC // PTPRC // PTPRC // PTPRC // PTPRC // HLA-DPA1 // HLA-DRB1 // HLA-DRB1 // HLA-DRB1 // HLA-DRB1 // HLA-DRB1 // HLA-DRB1 // HLA-DRB1 // HLA-DRB1 // HLA-DRB1 // HLA-DRB1 // HLA-DRB1 // HLA-DRB1 // HLA-DRB1 // PTPN6 // PTPN6 // PTPN6 // SYK // FCER1G // HLA-DQA1 // CD3D // LYN // LYN // HLA-DPB1 // IGKV4-1 // TLR2…	1.679e-14
GO:0002768	biological_process	immune response-regulating cell surface receptor signaling pathway	6	IGKC // HLA-DRA // HLA-DQB1 // HCK // LCP2 // MNDA // PTPRC // PTPRC // PTPRC // PTPRC // PTPRC // PTPRC // PTPRC // PTPRC // HLA-DPA1 // LILRB2 // HLA-DRB1 // HLA-DRB1 // HLA-DRB1 // HLA-DRB1 // HLA-DRB1 // HLA-DRB1 // HLA-DRB1 // HLA-DRB1 // HLA-DRB1 // HLA-DRB1 // HLA-DRB1 // HLA-DRB1 // HLA-DRB1 // PTPN6 // PTPN6 // PTPN6 // SYK // FCER1G // HLA-DQA1 // CD3D // LYN // LYN // HLA-DPB1 // IGKV4…	1.73639e-14
GO:0032755	biological_process	positive regulation of interleukin-6 production	6	CD36 // CD36 // CD36 // CD36 // CD36 // CD36 // CD36 // CD36 // LILRB2 // PYCARD // FCER1G // TLR2 // TLR7 // TLR4 // MAPK13 // IL1B // IL1B // IL1B // IL1B // MYD88 // MYD88 // MYD88 // P2RX7 // P2RX7	1.85713e-14
GO:0071229	biological_process	cellular response to acid	5	CYBA // S100A10 // COL1A1 // PDGFRA // PDGFRA // PDGFRA // PDGFRA // ANXA2 // ANXA2 // ANXA2 // ANXA2 // ANXA2 // ANXA2 // ANXA2 // ANXA2 // ANXA2 // ANXA2 // ANXA2 // ANXA2 // ANXA2 // ANXA2 // ANXA2 // ANXA2 // ANXA2 // MMP2 // MMP2 // MMP2 // DNMT1 // DNMT1 // DNMT1	1.87494e-14
GO:0002699	biological_process	positive regulation of immune effector process	5	CD36 // CD36 // CD36 // CD36 // CD36 // CD36 // CD36 // CD36 // HMOX1 // HMOX1 // PTPRC // PTPRC // CCL2 // SYK // FCER1G // LYN // LYN // CD37 // CD86 // TLR2 // CCL19 // FCER1A // FGR // FGR // TLR4 // SASH3 // CD28 // IL1B // CRTAM // CD80 // IL12RB1 // MIF // P2RX7 // P2RX7 // TGFB1 // CADM1 // CADM1 // CADM1 // STXBP2 // CCR2	1.97694e-14
GO:0051050	biological_process	positive regulation of transport	5	CD36 // CD36 // CD36 // CD36 // CD36 // CD36 // CD36 // CD36 // CCL5 // APOE // CD14 // CD14 // CD14 // CD14 // PYCARD // HLA-DRB1 // HLA-DRB1 // HLA-DRB1 // HLA-DRB1 // HLA-DRB1 // DOCK2 // DOCK2 // ABCA1 // CCL2 // CCR1 // HCLS1 // SYK // FCER1G // ABCG1 // SCYL2 // CASP1 // CLEC5A // HTR2B // TLR2 // TLR7 // SGK1 // DAB2 // DAB2 // DAB2 // DAB2 // CCL19 // GREM1 // CSF1R // FCER1A // FGR // FG…	3.40755e-14
GO:0044093	biological_process	positive regulation of molecular function	3	S100A8 // CHI3L1 // S100A9 // CCL5 // APOE // GPR65 // GMFG // GNA13 // CXCR4 // CTSH // PTPRC // PTPRC // RGS1 // PYCARD // CCL2 // TIMP2 // TIMP2 // SYK // CASP1 // RASGRP3 // LYN // LYN // TNFSF10 // GNA15 // IL8 // HTR2B // TLR2 // IFI27 // SGK1 // C5AR1 // PLEK // DAB2 // DAB2 // DAB2 // DAB2 // CCL19 // GREM1 // MAP3K1 // PAK1 // PTPLAD1 // CSF1R // CSF1R // FCER1A // CR1 // DNAJC3 // ADAP2…	4.59352e-14
GO:0002683	biological_process	negative regulation of immune system process	4	HMOX1 // HMOX1 // SAMSN1 // SAMSN1 // MNDA // PTPRC // PTPRC // LILRB2 // HLA-DRB1 // HLA-DRB1 // HLA-DRB1 // HLA-DRB1 // HLA-DRB1 // CCL2 // VSIG4 // PTPN6 // PTPN6 // PTPN6 // PTPRJ // LYN // LYN // GREM1 // IL7R // IL7R // IL7R // CR1 // LST1 // NR1H3 // NR1H3 // NR1H3 // NR1H3 // NR1H3 // NR1H3 // NR1H3 // NR1H3 // ARRB2 // ARRB2 // IRAK3 // THBS1 // IFI16 // LPXN // CDKN2A // MICB // TNFAIP3…	6.05419e-14
GO:0051049	biological_process	regulation of transport	4	APOC1 // CD36 // CD36 // CD36 // CD36 // CD36 // CD36 // CD36 // CD36 // VAMP8 // VAMP8 // HMOX1 // HMOX1 // CCL5 // APOE // CD14 // CD14 // CD14 // CD14 // HCK // LCP1 // LILRB2 // PYCARD // HLA-DRB1 // HLA-DRB1 // HLA-DRB1 // HLA-DRB1 // HLA-DRB1 // DOCK2 // DOCK2 // ABCA1 // CCL2 // CCR1 // BID // HCLS1 // SYK // FCER1G // ABCG1 // SCYL2 // CASP1 // LYN // LYN // CLEC5A // SRGN // TLR1 // TLR1…	6.07475e-14
GO:0030097	biological_process	hemopoiesis	7	MMP9 // PTPRC // PTPRC // SNX10 // VCAM1 // DOCK2 // DOCK2 // HCLS1 // SYK // HLA-DMA // HLA-DMA // IRF8 // IRF8 // IRF8 // IRF8 // IRF8 // IRF8 // CD3D // LYN // LYN // PLEK // DAB2 // DAB2 // DAB2 // DAB2 // CCL19 // IL7R // IL7R // IL7R // CSF1R // CSF1R // PLCG2 // PLCG2 // SOD2 // SOD2 // SOD2 // STK4 // CCR7 // CCR7 // CCR7 // GPR183 // ITK // ITK // CEBPA // SPI1 // IREB2 // IREB2 // LMO2 …	6.07475e-14
GO:0023056	biological_process	positive regulation of signaling	4	CHI3L1 // CD36 // CD36 // CD36 // CD36 // CD36 // CD36 // CD36 // CD36 // HMOX1 // CCL5 // CXCR4 // PTPRC // PTPRC // PYCARD // CCL2 // TIMP2 // TIMP2 // CCR1 // BID // PTPN6 // PTPRJ // HCLS1 // SYK // CASP1 // LYN // LYN // TNFSF10 // HTR2B // TLR2 // C5AR1 // DAB2 // DAB2 // DAB2 // DAB2 // CCL19 // OSM // PAK1 // PTPLAD1 // XIAP // CSF1R // CSF1R // FCER1A // FGR // LY86 // NR1H3 // AKR1C3 //…	6.26328e-14
GO:0050794	biological_process	regulation of cellular process	3	SPP1 // MMP12 // CCL18 // APOC1 // S100A8 // CHI3L1 // MMP9 // IFI30 // S100A9 // IGKC // BCL2A1 // PLA2G7 // ACP5 // ACP5 // ACP5 // CTSS // CD36 // CD36 // CD36 // CD36 // CD36 // CD36 // CD36 // CD36 // VAMP8 // VAMP8 // HMOX1 // HMOX1 // TYROBP // ADAMDEC1 // CCL5 // APOE // APOE // APOE // HLA-DRA // CD14 // CD14 // CD14 // CD14 // HLA-DQB1 // GPR65 // GMFG // SAMSN1 // SAMSN1 // TREM1 // C3…	6.44171e-14
GO:0002224	biological_process	toll-like receptor signaling pathway	11	CTSS // CD36 // CD14 // LY96 // ITGB2 // ITGAM // CTSB // LGMN // CD86 // CD86 // TLR1 // TLR1 // TLR1 // TLR2 // TLR7 // MAP3K1 // TLR4 // CTSL1 // CTSK // BIRC3 // TLR5 // IRAK3 // RPS6KA1 // MYD88 // MYD88 // MYD88 // MYD88 // MYD88 // TLR8 // TLR8 // MAPKAPK3 // MAPKAPK3 // MAPKAPK3 // CDK1 // DUSP4 // DUSP6 // BTK	7.69996e-14
GO:0010647	biological_process	positive regulation of cell communication	5	CHI3L1 // CD36 // CD36 // CD36 // CD36 // CD36 // CD36 // CD36 // CD36 // HMOX1 // CCL5 // CXCR4 // PTPRC // PTPRC // PYCARD // CCL2 // TIMP2 // TIMP2 // CCR1 // BID // PTPN6 // PTPRJ // HCLS1 // SYK // CASP1 // LYN // LYN // TNFSF10 // HTR2B // TLR2 // C5AR1 // DAB2 // DAB2 // DAB2 // DAB2 // CCL19 // OSM // PAK1 // PTPLAD1 // XIAP // CSF1R // CSF1R // FCER1A // FGR // LY86 // NR1H3 // AKR1C3 //…	8.04788e-14
GO:0051094	biological_process	positive regulation of developmental process	4	CHI3L1 // CD36 // CD36 // CD36 // CD36 // CD36 // CD36 // CD36 // CD36 // HMOX1 // HMOX1 // APOE // APOE // APOE // C3AR1 // C3AR1 // LPL // LPL // LPL // LPL // CXCR4 // CTSH // CTSH // PTPRC // PTPRC // LILRB2 // TIMP2 // TIMP2 // CCR1 // HCLS1 // SYK // HLA-DMA // HLA-DMA // LYN // LYN // VNN1 // CD86 // DAB2 // DAB2 // DAB2 // DAB2 // CCL19 // CA2 // GREM1 // IL7R // IL7R // IL7R // CX3CR1 //…	1.06058e-13
GO:0050878	biological_process	regulation of body fluid levels	3	CD36 // TREM1 // GNA13 // GNA13 // HBB // LCP2 // APBB1IP // MMP1 // SERPINA1 // ITGB2 // ITGAM // ITGAX // PTPN6 // PTPRJ // SYK // FCER1G // F13A1 // F13A1 // SLC16A3 // LYN // SRGN // GNA15 // ATP1B1 // PLEK // CD48 // CYBA // RASGRP1 // RAC2 // PLAUR // PPBP // CD84 // CD2 // FGR // PLCG2 // CFD // VAV1 // HK2 // HK2 // ARRB2 // PECAM1 // PROCR // PLAT // SLC7A7 // GRB2 // PLAU // PRKCH // IT…	1.20937e-13
GO:0042102	biological_process	positive regulation of T cell proliferation	9	CCL5 // PTPRC // PTPRC // LILRB2 // PYCARD // VCAM1 // SYK // AIF1 // CCL19 // IL18 // CORO1A // CORO1A // CORO1A // CORO1A // SASH3 // CD28 // CD28 // IL1B // CD1D // ITGAL // ITGAL // ITGAL // NCKAP1L // CD80 // PNP // IGF1 // IL12RB1 // CCR2	1.23496e-13
GO:0050764	biological_process	regulation of phagocytosis	7	CD36 // CD36 // CD36 // CD36 // CD36 // CD36 // CD36 // CD36 // HCK // PYCARD // DOCK2 // DOCK2 // CCL2 // SYK // FCER1G // FGR // FGR // SCARB1 // CSK // CSK // CSK // CSK // SLC11A1 // NCKAP1L // PTX3 // CAMK1D // TGFB1	1.2587e-13
GO:0070665	biological_process	positive regulation of leukocyte proliferation	6	CCL5 // PTPRC // PTPRC // LILRB2 // PYCARD // VCAM1 // SYK // LYN // AIF1 // CCL19 // IL18 // TLR4 // CORO1A // CORO1A // CORO1A // CORO1A // SASH3 // GPR183 // CD28 // CD28 // IL1B // CD1D // ITGAL // ITGAL // ITGAL // NCKAP1L // CD80 // PNP // MYD88 // MYD88 // IGF1 // IL12RB1 // MIF // CCR2	1.60673e-13
GO:0002520	biological_process	immune system development	5	MMP9 // PTPRC // PTPRC // SNX10 // VCAM1 // DOCK2 // DOCK2 // HCLS1 // SYK // HLA-DMA // HLA-DMA // IRF8 // IRF8 // IRF8 // IRF8 // IRF8 // IRF8 // CD3D // LYN // LYN // PLEK // DAB2 // DAB2 // DAB2 // DAB2 // CCL19 // IL7R // IL7R // IL7R // CSF1R // CSF1R // PLCG2 // PLCG2 // SOD2 // SOD2 // SOD2 // STK4 // CCR7 // CCR7 // CCR7 // GPR183 // ITK // ITK // CEBPA // SPI1 // IREB2 // IREB2 // LMO2 …	1.67491e-13
GO:0043900	biological_process	regulation of multi-organism process	3	CD36 // CD36 // CD36 // CD36 // CD36 // CD36 // CD36 // CD36 // CCL5 // HCK // DOCK2 // IRF8 // IRF8 // IRF8 // IRF8 // IRF8 // IRF8 // OAS1 // IL8 // TLR2 // LY86 // APOBEC3G // OAS3 // MX1 // CCL4 // BIRC3 // CD28 // PACS1 // ISG15 // PLSCR1 // APOBEC3C // IFI16 // TIMP1 // CD4 // MYD88 // MYD88 // IL12RB1 // MIF // IFITM1 // P2RX7 // OXTR // OXTR // OXTR // MICB // TNFAIP3 // CD180 // IL10 // …	1.89076e-13
GO:0009967	biological_process	positive regulation of signal transduction	6	CHI3L1 // CD36 // CD36 // CD36 // CD36 // CD36 // CD36 // CD36 // CD36 // HMOX1 // CCL5 // CXCR4 // PTPRC // PTPRC // PYCARD // TIMP2 // TIMP2 // CCR1 // BID // PTPN6 // PTPRJ // HCLS1 // SYK // CASP1 // LYN // LYN // TNFSF10 // HTR2B // TLR2 // C5AR1 // DAB2 // DAB2 // DAB2 // DAB2 // CCL19 // OSM // PAK1 // PTPLAD1 // XIAP // CSF1R // CSF1R // FCER1A // FGR // LY86 // NR1H3 // AKR1C3 // TLR4 //…	1.89572e-13
GO:0044703	biological_process	multi-organism reproductive process	3	SPP1 // MMP9 // HCK // CXCR4 // MMP1 // ANPEP // FCGR2B // VCAM1 // CCR5 // CCL2 // SYK // PILRA // LYN // CLEC5A // CD86 // HLA-B // HLA-B // HLA-B // HLA-B // HLA-B // HLA-B // HLA-B // HLA-B // HLA-B // HLA-B // HLA-B // HLA-B // HLA-B // HLA-B // HLA-B // HLA-B // HLA-B // HLA-B // HLA-B // HLA-B // HLA-B // HLA-B // HLA-B // HLA-B // HLA-B // HLA-B // HLA-B // HLA-B // HLA-B // HLA-B // HLA-…	2.08997e-13
GO:1901701	biological_process	cellular response to oxygen-containing compound	5	CD36 // CD36 // CD36 // CD36 // CD36 // CD36 // CD36 // CD36 // CCL5 // APOE // APOE // APOE // CD14 // HBB // HCK // LY96 // LILRB2 // PYCARD // VCAM1 // CCR5 // ABCA1 // CCL2 // PTPN6 // IRF8 // IRF8 // IRF8 // IRF8 // IRF8 // IRF8 // LYN // LYN // UCP2 // UCP2 // IL8 // IL8 // TLR2 // CYBA // ATP6V1F // IL18 // PAK1 // PAK1 // PAK1 // PAK1 // PAK1 // PAK1 // PAK1 // COLEC12 // MYO5A // CX3CR1 …	2.57334e-13
GO:0044126	biological_process	regulation of growth of symbiont in host	5	CD36 // CD36 // CD36 // CD36 // CD36 // CD36 // CD36 // CD36 // IRF8 // IRF8 // IRF8 // IRF8 // IRF8 // IRF8 // TLR2 // MYD88 // MYD88 // IL10	2.74632e-13
GO:0044130	biological_process	negative regulation of growth of symbiont in host	7	CD36 // CD36 // CD36 // CD36 // CD36 // CD36 // CD36 // CD36 // IRF8 // IRF8 // IRF8 // IRF8 // IRF8 // IRF8 // TLR2 // MYD88 // MYD88 // IL10	2.74632e-13
GO:0002690	biological_process	positive regulation of leukocyte chemotaxis	9	PLA2G7 // CCL5 // C3AR1 // C3AR1 // CCL2 // CCR1 // PTPRJ // AIF1 // IL8 // CCL19 // CCL7 // CCR7 // CCR7 // CCR7 // CCL4 // CXCL10 // NCKAP1L // THBS1 // CXCL12 // SERPINE1 // CAMK1D // VEGFC // CCR2 // CCR2	3.03258e-13
GO:0050671	biological_process	positive regulation of lymphocyte proliferation	8	CCL5 // PTPRC // PTPRC // LILRB2 // PYCARD // VCAM1 // SYK // AIF1 // CCL19 // IL18 // TLR4 // CORO1A // CORO1A // CORO1A // CORO1A // SASH3 // GPR183 // CD28 // CD28 // IL1B // CD1D // ITGAL // ITGAL // ITGAL // NCKAP1L // CD80 // PNP // MYD88 // MYD88 // IGF1 // IL12RB1 // MIF // CCR2	3.65186e-13
GO:0001568	biological_process	blood vessel development	8	HMOX1 // HMOX1 // APOE // APOE // APOE // GNA13 // GNA13 // CXCR4 // ANPEP // CCL2 // PTPRJ // SYK // IL8 // GREM1 // IL18 // TYMP // PECAM1 // S1PR1 // SAT1 // STK4 // SCG2 // SCG2 // SCG2 // CYP1B1 // NRP2 // NRP2 // NRP2 // NRP2 // PLXDC1 // COL1A1 // FLT1 // ADM // PRKX // ZMIZ1 // HHEX // HHEX // LYL1 // PDGFRA // PDGFRA // PDGFRA // PDGFRA // ANXA2 // ANXA2 // ANXA2 // ANXA2 // ANXA2 // ANX…	4.2696e-13
GO:0032946	biological_process	positive regulation of mononuclear cell proliferation	7	CCL5 // PTPRC // PTPRC // LILRB2 // PYCARD // VCAM1 // SYK // AIF1 // CCL19 // IL18 // TLR4 // CORO1A // CORO1A // CORO1A // CORO1A // SASH3 // GPR183 // CD28 // CD28 // IL1B // CD1D // ITGAL // ITGAL // ITGAL // NCKAP1L // CD80 // PNP // MYD88 // MYD88 // IGF1 // IL12RB1 // MIF // CCR2	4.74317e-13
GO:0044144	biological_process	modulation of growth of symbiont involved in interaction with host	5	CD36 // CD36 // CD36 // CD36 // CD36 // CD36 // CD36 // CD36 // IRF8 // IRF8 // IRF8 // IRF8 // IRF8 // IRF8 // TLR2 // MYD88 // MYD88 // IL10	5.7436e-13
GO:0044146	biological_process	negative regulation of growth of symbiont involved in interaction with host	6	CD36 // CD36 // CD36 // CD36 // CD36 // CD36 // CD36 // CD36 // IRF8 // IRF8 // IRF8 // IRF8 // IRF8 // IRF8 // TLR2 // MYD88 // MYD88 // IL10	5.7436e-13
GO:0022415	biological_process	viral reproductive process	4	HCK // CXCR4 // MMP1 // ANPEP // FCGR2B // VCAM1 // CCR5 // CCL2 // SYK // PILRA // LYN // CLEC5A // CD86 // HLA-B // HLA-B // HLA-B // HLA-B // HLA-B // HLA-B // HLA-B // HLA-B // HLA-B // HLA-B // HLA-B // HLA-B // HLA-B // HLA-B // HLA-B // HLA-B // HLA-B // HLA-B // HLA-B // HLA-B // HLA-B // HLA-B // HLA-B // HLA-B // HLA-B // HLA-B // HLA-B // HLA-B // HLA-B // HLA-B // HLA-B // HLA-B // HL…	6.51786e-13
GO:0048514	biological_process	blood vessel morphogenesis	9	HMOX1 // HMOX1 // APOE // APOE // APOE // GNA13 // GNA13 // CXCR4 // ANPEP // CCL2 // PTPRJ // SYK // IL8 // GREM1 // IL18 // TYMP // S1PR1 // SAT1 // STK4 // SCG2 // SCG2 // SCG2 // CYP1B1 // NRP2 // NRP2 // NRP2 // NRP2 // PLXDC1 // FLT1 // ADM // PRKX // ZMIZ1 // HHEX // HHEX // PDGFRA // PDGFRA // PDGFRA // PDGFRA // ANXA2 // ANXA2 // ANXA2 // ANXA2 // ANXA2 // ANXA2 // ANXA2 // ANXA2 // ANXA…	6.97282e-13
GO:0030195	biological_process	negative regulation of blood coagulation	7	APOE // PLAUR // PLAT // PLAU // PDGFRA // ANXA2 // ANXA2 // ANXA2 // ANXA2 // ANXA2 // ANXA2 // ANXA2 // ANXA2 // ANXA2 // ANXA2 // ANXA2 // ANXA2 // ANXA2 // ANXA2 // ANXA2 // ANXA2 // ANXA2 // SERPINE1	8.98321e-13
GO:1900047	biological_process	negative regulation of hemostasis	5	APOE // PLAUR // PLAT // PLAU // PDGFRA // ANXA2 // ANXA2 // ANXA2 // ANXA2 // ANXA2 // ANXA2 // ANXA2 // ANXA2 // ANXA2 // ANXA2 // ANXA2 // ANXA2 // ANXA2 // ANXA2 // ANXA2 // ANXA2 // ANXA2 // SERPINE1	8.98321e-13
GO:0050920	biological_process	regulation of chemotaxis	5	PLA2G7 // CCL5 // C3AR1 // C3AR1 // CXCR4 // CCL2 // CCR1 // PTPRJ // LYN // AIF1 // IL8 // IL8 // CCL19 // GREM1 // CCL7 // S1PR1 // CCR7 // CCR7 // CCR7 // SCG2 // CCL4 // CXCL10 // NCKAP1L // PDGFRA // THBS1 // CXCL12 // SERPINE1 // MPP1 // MPP1 // CAMK1D // TGFB1 // VEGFC // CCR2 // CCR2	9.15014e-13
GO:0010740	biological_process	positive regulation of intracellular protein kinase cascade	7	CHI3L1 // CD36 // CD36 // CD36 // CD36 // CD36 // CD36 // CD36 // CD36 // HMOX1 // CCL5 // CXCR4 // PTPRC // PTPRC // PYCARD // TIMP2 // TIMP2 // CCR1 // PTPRJ // HCLS1 // SYK // CASP1 // LYN // LYN // TNFSF10 // HTR2B // C5AR1 // DAB2 // DAB2 // DAB2 // DAB2 // CCL19 // OSM // PAK1 // PTPLAD1 // CSF1R // CSF1R // FCER1A // AKR1C3 // TLR4 // IL1RN // ARRB2 // ARRB2 // CCR7 // GPR183 // FPR1 // MA…	1.12753e-12
GO:0032880	biological_process	regulation of protein localization	4	CD36 // CD36 // CD36 // CD36 // CD36 // CD36 // CD36 // CD36 // CD14 // CD14 // CD14 // CD14 // LCP1 // PYCARD // HLA-DRB1 // HLA-DRB1 // HLA-DRB1 // HLA-DRB1 // HLA-DRB1 // BID // HCLS1 // SYK // CASP1 // LYN // LYN // CLEC5A // SRGN // TLR1 // TLR1 // TLR1 // HTR2B // TLR2 // TLR7 // DAB2 // CCL19 // GREM1 // CSF1R // GZMB // FGR // FGR // NR1H3 // NR1H3 // NR1H3 // NR1H3 // NR1H3 // NR1H3 // N…	1.19957e-12
GO:0072503	biological_process	cellular divalent inorganic cation homeostasis	8	S100A8 // CD52 // S100A9 // CCL5 // APOE // APOE // APOE // C3AR1 // CXCR4 // PTPRC // PTPRC // CCR5 // CCL2 // CCR1 // CCL8 // GNA15 // HTR2B // C5AR1 // CCL19 // CXCR2 // CXCR2 // CXCR2 // CXCR2 // CXCR2 // CX3CR1 // CX3CR1 // CX3CR1 // PLCG2 // PLCG2 // CCL7 // S1PR1 // CCR7 // CCR7 // CCR7 // HEXB // HEXB // HEXB // ADM // ADM // SLC11A1 // PDGFRA // CXCL12 // BCAP31 // P2RX7 // P2RX7 // OXTR…	1.48972e-12
GO:0050819	biological_process	negative regulation of coagulation	5	APOE // PLAUR // PROCR // PLAT // PLAU // PDGFRA // ANXA2 // ANXA2 // ANXA2 // ANXA2 // ANXA2 // ANXA2 // ANXA2 // ANXA2 // ANXA2 // ANXA2 // ANXA2 // ANXA2 // ANXA2 // ANXA2 // ANXA2 // ANXA2 // ANXA2 // SERPINE1	1.59336e-12
GO:0032735	biological_process	positive regulation of interleukin-12 production	6	CD36 // CD36 // CD36 // CD36 // CD36 // CD36 // CD36 // CD36 // IRF8 // IRF8 // IRF8 // IRF8 // IRF8 // IRF8 // TLR2 // CCL19 // TLR4 // CCR7 // CCR7 // CCR7	1.94344e-12
GO:0007204	biological_process	elevation of cytosolic calcium ion concentration	11	CD52 // C3AR1 // CXCR4 // PTPRC // PTPRC // CCR5 // CCR1 // GNA15 // HTR2B // C5AR1 // CCL19 // CXCR2 // CXCR2 // CXCR2 // CXCR2 // CXCR2 // CX3CR1 // CX3CR1 // CX3CR1 // PLCG2 // PLCG2 // S1PR1 // CCR7 // CCR7 // CCR7 // ADM // ADM // PDGFRA // BCAP31 // P2RX7 // P2RX7 // OXTR // OXTR // OXTR // LCK // LCK // CD55 // CXCR6 // F2R // CCR2 // CCR2	2.56338e-12
GO:0072507	biological_process	divalent inorganic cation homeostasis	7	S100A8 // CD52 // S100A9 // CCL5 // APOE // APOE // APOE // C3AR1 // CXCR4 // PTPRC // PTPRC // CCR5 // CCL2 // CCR1 // CCL8 // GNA15 // HTR2B // C5AR1 // CCL19 // CXCR2 // CXCR2 // CXCR2 // CXCR2 // CXCR2 // CX3CR1 // CX3CR1 // CX3CR1 // PLCG2 // PLCG2 // CCL7 // S1PR1 // CCR7 // CCR7 // CCR7 // HEXB // HEXB // HEXB // ADM // ADM // CYP27B1 // SLC11A1 // PDGFRA // CXCL12 // BCAP31 // P2RX7 // P2…	3.18939e-12
GO:0050830	biological_process	defense response to Gram-positive bacterium	6	ACP5 // ACP5 // ACP5 // CD36 // CD36 // CD36 // CD36 // CD36 // CD36 // CD36 // CD36 // HCK // MMP7 // TLR2 // C5AR1 // FGR // FGR // MYO1F // MYD88 // MYD88 // MYD88 // P2RX7 // P2RX7	3.24854e-12
GO:0051240	biological_process	positive regulation of multicellular organismal process	4	SPP1 // CD36 // CD36 // CD36 // CD36 // CD36 // CD36 // CD36 // CD36 // HMOX1 // CD14 // C3AR1 // C3AR1 // LILRB2 // PYCARD // CCL2 // SYK // FCER1G // IRF8 // IRF8 // IRF8 // IRF8 // IRF8 // IRF8 // CASP1 // HTR2B // TLR2 // TLR7 // CCL19 // CA2 // GREM1 // IL18 // CSF1R // TBXAS1 // TBXAS1 // TBXAS1 // TBXAS1 // TLR4 // ARRB2 // ARRB2 // MAPK13 // CCR7 // CCR7 // CCR7 // PLAT // PLAT // PLAT //…	3.35251e-12
GO:0010883	biological_process	regulation of lipid storage	4	CD36 // CD36 // CD36 // CD36 // CD36 // CD36 // CD36 // CD36 // LPL // ABCA1 // ABCG1 // NR1H3 // NR1H3 // NR1H3 // NR1H3 // NR1H3 // NR1H3 // NR1H3 // NR1H3 // SCARB1 // MSR1 // MSR1 // PPARG	7.37703e-12
GO:0002495	biological_process	antigen processing and presentation of peptide antigen via MHC class II	4	IFI30 // CTSS // HLA-DRA // HLA-DQB1 // HLA-DMB // HLA-DPA1 // HLA-DRB1 // HLA-DRB1 // HLA-DRB1 // HLA-DRB1 // HLA-DRB1 // HLA-DRB1 // HLA-DRB1 // HLA-DRB1 // HLA-DRB1 // HLA-DRB1 // HLA-DRB1 // HLA-DRB1 // HLA-DRB1 // LGMN // HLA-DMA // HLA-DMA // FCER1G // HLA-DQA1 // HLA-DPB1 // CTSD // MARCH1 // MARCH1 // CTSL1 // AP1S2	7.66291e-12
GO:0001101	biological_process	response to acid	3	CCL2 // LGMN // LGMN // LGMN // LGMN // LYN // LYN // CYBA // S100A10 // COL1A1 // SDS // PDGFRA // PDGFRA // PDGFRA // PDGFRA // ANXA2 // ANXA2 // ANXA2 // ANXA2 // ANXA2 // ANXA2 // ANXA2 // ANXA2 // ANXA2 // ANXA2 // ANXA2 // ANXA2 // ANXA2 // ANXA2 // ANXA2 // ANXA2 // ANXA2 // MMP2 // MMP2 // MMP2 // ICAM1 // DNMT1 // DNMT1 // DNMT1	7.89189e-12
GO:0043903	biological_process	regulation of symbiosis, encompassing mutualism through parasitism	4	CD36 // CD36 // CD36 // CD36 // CD36 // CD36 // CD36 // CD36 // IRF8 // IRF8 // IRF8 // IRF8 // IRF8 // IRF8 // TLR2 // MYD88 // MYD88 // IFITM1 // IL10	9.53832e-12
GO:0006928	biological_process	cellular component movement	3	SPP1 // MMP12 // S100A8 // S100A9 // CCL5 // TREM1 // GNA13 // HCK // CXCR4 // PTPRC // MMP1 // ITGB2 // ITGAM // VCAM1 // CCR5 // ITGAX // CCL2 // FPR3 // CCR1 // PTPN6 // SYK // FCER1G // PLTP // SLC16A3 // LYN // VNN1 // IL8 // HTR2B // C5AR1 // ATP1B1 // CCL19 // CD48 // CXCR2 // CXCR2 // CXCR2 // CXCR2 // CXCR2 // BIN2 // GREM1 // PLAUR // PPBP // CD84 // CD2 // MYO5A // CX3CR1 // CX3CR1 // …	9.77052e-12
GO:0044765	biological_process	single-organism transport	4	APOC1 // CHI3L1 // IGKC // CD36 // CD36 // CD36 // CD36 // CD36 // CD36 // CD36 // CD36 // VAMP8 // HMOX1 // CCL5 // APOE // APOE // APOE // APOE // CP // CP // CP // CP // CP // CD14 // HBB // HCK // HCK // LCP2 // PTPRC // PTPRC // SERPINA1 // PYCARD // MMP7 // SLC14A1 // DOCK2 // DOCK2 // CCR5 // ABCA1 // STEAP4 // CCR1 // BID // SYK // FCER1G // ABCG1 // SCYL2 // CCL8 // IRF8 // IRF8 // IRF8 …	1.04086e-11
GO:0006874	biological_process	cellular calcium ion homeostasis	9	CD52 // CCL5 // APOE // APOE // APOE // C3AR1 // CXCR4 // PTPRC // PTPRC // CCR5 // CCL2 // CCR1 // CCL8 // GNA15 // HTR2B // C5AR1 // CCL19 // CXCR2 // CXCR2 // CXCR2 // CXCR2 // CXCR2 // CX3CR1 // CX3CR1 // CX3CR1 // PLCG2 // PLCG2 // CCL7 // S1PR1 // CCR7 // CCR7 // CCR7 // HEXB // HEXB // HEXB // ADM // ADM // PDGFRA // CXCL12 // BCAP31 // P2RX7 // P2RX7 // OXTR // OXTR // OXTR // CCL13 // LC…	1.30928e-11
GO:0050921	biological_process	positive regulation of chemotaxis	6	PLA2G7 // CCL5 // C3AR1 // C3AR1 // CCL2 // CCR1 // PTPRJ // AIF1 // IL8 // IL8 // CCL19 // CCL7 // S1PR1 // CCR7 // CCR7 // CCR7 // SCG2 // CCL4 // CXCL10 // NCKAP1L // THBS1 // CXCL12 // SERPINE1 // CAMK1D // TGFB1 // VEGFC // CCR2 // CCR2	1.35494e-11
GO:0051174	biological_process	regulation of phosphorus metabolic process	5	APOC1 // CHI3L1 // CD36 // CD36 // CD36 // CD36 // CD36 // CD36 // CD36 // CD36 // CCL5 // APOE // GPR65 // GMFG // SAMSN1 // SAMSN1 // STMN3 // STMN3 // CXCR4 // PTPRC // PTPRC // RGS1 // PYCARD // ITGB2 // CCR5 // ABCA1 // CCL2 // TIMP2 // TIMP2 // PTPN6 // PTPN6 // PTPN6 // PTPRJ // HCLS1 // SYK // RASGRP3 // RASGRP3 // RASGRP3 // RASGRP3 // RASGRP3 // RASGRP3 // LYN // LYN // IL8 // HTR2B // …	1.49102e-11
GO:0019220	biological_process	regulation of phosphate metabolic process	6	APOC1 // CHI3L1 // CD36 // CD36 // CD36 // CD36 // CD36 // CD36 // CD36 // CD36 // CCL5 // APOE // GPR65 // GMFG // SAMSN1 // SAMSN1 // STMN3 // STMN3 // CXCR4 // PTPRC // PTPRC // RGS1 // PYCARD // ITGB2 // CCR5 // ABCA1 // CCL2 // TIMP2 // TIMP2 // PTPN6 // PTPN6 // PTPN6 // PTPRJ // HCLS1 // SYK // RASGRP3 // RASGRP3 // RASGRP3 // RASGRP3 // RASGRP3 // RASGRP3 // LYN // LYN // IL8 // HTR2B // …	1.56272e-11
GO:0006897	biological_process	endocytosis	5	IGKC // CD36 // CD36 // CD36 // CD36 // CD36 // CD36 // CD36 // CD36 // APOE // CD14 // HCK // HCK // PYCARD // DOCK2 // DOCK2 // ABCA1 // SYK // FCER1G // SCYL2 // IRF8 // IRF8 // IRF8 // IRF8 // IRF8 // IRF8 // LYN // IGKV4-1 // AIF1 // IL8 // HTR2B // FCN1 // DAB2 // DAB2 // DAB2 // DAB2 // CXCR2 // BIN2 // PAK1 // COLEC12 // FGR // PLCG2 // VAV1 // NR1H3 // CORO1A // ARRB2 // ARRB2 // SCARB1 …	1.96785e-11
GO:0055074	biological_process	calcium ion homeostasis	8	CD52 // CCL5 // APOE // APOE // APOE // C3AR1 // CXCR4 // PTPRC // PTPRC // CCR5 // CCL2 // CCR1 // CCL8 // GNA15 // HTR2B // C5AR1 // CCL19 // CXCR2 // CXCR2 // CXCR2 // CXCR2 // CXCR2 // CX3CR1 // CX3CR1 // CX3CR1 // PLCG2 // PLCG2 // CCL7 // S1PR1 // CCR7 // CCR7 // CCR7 // HEXB // HEXB // HEXB // ADM // ADM // CYP27B1 // PDGFRA // CXCL12 // BCAP31 // P2RX7 // P2RX7 // OXTR // OXTR // OXTR // …	2.1197e-11
GO:0002703	biological_process	regulation of leukocyte mediated immunity	5	HMOX1 // HMOX1 // PTPRC // PTPRC // PTPN6 // PTPN6 // PTPN6 // SYK // FCER1G // LYN // LYN // IL7R // IL7R // IL7R // FCER1A // CR1 // FGR // FGR // ARRB2 // SASH3 // CD28 // IL1B // CRTAM // IL12RB1 // P2RX7 // P2RX7 // IL10 // TGFB1 // CADM1 // CADM1 // CADM1 // BTK // STXBP2 // CCR2	2.19752e-11
GO:0042110	biological_process	T cell activation	6	CXCR4 // PTPRC // PTPRC // LCP1 // ITGAM // DOCK2 // DOCK2 // SYK // HLA-DMA // HLA-DMA // CD3D // CD86 // CCL19 // CD48 // IL7R // IL7R // IL7R // CD2 // DPP4 // CCR7 // CCR7 // CCR7 // ITK // ITK // PSMB10 // CD28 // IKZF1 // CD1D // CRTAM // CD8A // SLC11A1 // ITGAL // ITGAL // ITGAL // CD80 // CXCL12 // BATF // CD4 // CD4 // BCL11B // P2RX7 // P2RX7 // ICAM1 // MICB // LCK // TGFB1 // CADM1 /…	3.14337e-11
GO:0015918	biological_process	sterol transport	6	APOC1 // CD36 // CD36 // CD36 // CD36 // CD36 // CD36 // CD36 // CD36 // APOE // APOE // APOE // ABCA1 // ABCG1 // NPC2 // SOAT1 // SCARB1 // MSR1 // MSR1 // NPC1 // NPC1 // NPC1 // APOC2	3.22933e-11
GO:0030301	biological_process	cholesterol transport	7	APOC1 // CD36 // CD36 // CD36 // CD36 // CD36 // CD36 // CD36 // CD36 // APOE // APOE // APOE // ABCA1 // ABCG1 // NPC2 // SOAT1 // SCARB1 // MSR1 // MSR1 // NPC1 // NPC1 // NPC1 // APOC2	3.22933e-11
GO:0051480	biological_process	cytosolic calcium ion homeostasis	10	CD52 // C3AR1 // CXCR4 // PTPRC // PTPRC // CCR5 // CCR1 // GNA15 // HTR2B // C5AR1 // CCL19 // CXCR2 // CXCR2 // CXCR2 // CXCR2 // CXCR2 // CX3CR1 // CX3CR1 // CX3CR1 // PLCG2 // PLCG2 // S1PR1 // CCR7 // CCR7 // CCR7 // ADM // ADM // PDGFRA // BCAP31 // P2RX7 // P2RX7 // OXTR // OXTR // OXTR // LCK // LCK // CD55 // CXCR6 // F2R // CCR2 // CCR2	3.43512e-11
GO:0030098	biological_process	lymphocyte differentiation	9	PTPRC // PTPRC // VCAM1 // DOCK2 // DOCK2 // SYK // HLA-DMA // HLA-DMA // CD3D // IL7R // IL7R // IL7R // PLCG2 // PLCG2 // CCR7 // CCR7 // CCR7 // GPR183 // ITK // ITK // SPI1 // BLNK // CD28 // IKZF1 // ITGA4 // CD1D // CD8A // HHEX // HHEX // LYL1 // LYL1 // BATF // CD4 // LGALS8 // LGALS8 // LGALS8 // LGALS8 // LGALS8 // BCL11B // JAK3 // IL10 // LCK // TGFB1 // XRCC4 // PTPN22 // PTPN22 // F…	4.14541e-11
GO:0042592	biological_process	homeostatic process	3	S100A8 // CD52 // S100A9 // ACP5 // ACP5 // ACP5 // HMOX1 // CCL5 // APOE // APOE // APOE // CP // CP // CP // CP // CP // C3AR1 // LPL // CXCR4 // CTSH // PTPRC // PTPRC // VCAM1 // CCR5 // ABCA1 // CCL2 // STEAP4 // CCR1 // HCLS1 // LIPA // LIPA // LIPA // ABCG1 // CCL8 // LYN // LYN // HAMP // GNA15 // GLRX // EPB41L3 // HTR2B // C5AR1 // CCL19 // CYBA // CXCR2 // CXCR2 // CXCR2 // CXCR2 // CX…	4.91661e-11
GO:0045597	biological_process	positive regulation of cell differentiation	5	CD36 // CD36 // CD36 // CD36 // CD36 // CD36 // CD36 // CD36 // APOE // APOE // APOE // LPL // LPL // LPL // LPL // CXCR4 // PTPRC // PTPRC // LILRB2 // TIMP2 // TIMP2 // CCR1 // HCLS1 // SYK // HLA-DMA // HLA-DMA // LYN // LYN // VNN1 // CD86 // DAB2 // DAB2 // DAB2 // DAB2 // CCL19 // CA2 // GREM1 // IL7R // IL7R // IL7R // SASH3 // MSR1 // MSR1 // CD83 // CEBPA // PRKCH // PRKCH // PRKCH // PR…	5.14357e-11
GO:0051607	biological_process	defense response to virus	5	PTPRC // PTPRC // PYCARD // ITGAX // CD86 // CD86 // OAS1 // OAS1 // OAS1 // OAS1 // OAS1 // OAS1 // OAS1 // TLR7 // DNAJC3 // APOBEC3G // OAS3 // OAS3 // OAS3 // OAS3 // OAS3 // MX1 // IFI44L // DDIT4 // CXCL10 // CD8A // APOBEC3B // ISG15 // PLSCR1 // APOBEC3C // IFI16 // IFITM1 // TLR8 // TLR8 // CXCL9 // ISG20 // DDX58 // IFIT3	5.22964e-11
GO:0048878	biological_process	chemical homeostasis	4	S100A8 // CD52 // S100A9 // HMOX1 // CCL5 // APOE // APOE // APOE // CP // CP // CP // CP // CP // C3AR1 // LPL // CXCR4 // CTSH // PTPRC // PTPRC // VCAM1 // CCR5 // ABCA1 // CCL2 // STEAP4 // CCR1 // ABCG1 // CCL8 // HAMP // GNA15 // EPB41L3 // HTR2B // C5AR1 // CCL19 // CYBA // CXCR2 // CXCR2 // CXCR2 // CXCR2 // CXCR2 // ATP6V1F // FABP4 // NPC2 // XIAP // MYO5A // TBXAS1 // TBXAS1 // TBXAS1 …	6.43771e-11
GO:0050866	biological_process	negative regulation of cell activation	5	HMOX1 // HMOX1 // APOE // SAMSN1 // SAMSN1 // MNDA // LILRB2 // HLA-DRB1 // HLA-DRB1 // HLA-DRB1 // HLA-DRB1 // HLA-DRB1 // VSIG4 // PTPN6 // PTPN6 // PTPN6 // LYN // LYN // LST1 // NR1H3 // NR1H3 // NR1H3 // NR1H3 // NR1H3 // NR1H3 // NR1H3 // NR1H3 // PDGFRA // CDKN2A // TNFAIP3 // TNFAIP3 // TNFAIP3 // TNFAIP3 // JAK3 // IL10 // TGFB1 // PTPN22 // PTPN22 // CCR2	6.46239e-11
GO:0032760	biological_process	positive regulation of tumor necrosis factor production	6	CD36 // CD36 // CD36 // CD36 // CD36 // CD36 // CD36 // CD36 // CD14 // PYCARD // FCER1G // TLR2 // CCL19 // IL18 // TLR4 // SASH3 // MYD88 // MYD88 // PF4	6.96616e-11
GO:0010627	biological_process	regulation of intracellular protein kinase cascade	6	CHI3L1 // CD36 // CD36 // CD36 // CD36 // CD36 // CD36 // CD36 // CD36 // HMOX1 // CCL5 // APOE // CXCR4 // PTPRC // PTPRC // PYCARD // TIMP2 // TIMP2 // CCR1 // PTPN6 // PTPN6 // PTPN6 // PTPRJ // HCLS1 // SYK // CASP1 // LYN // LYN // TNFSF10 // HTR2B // TLR2 // TLR7 // C5AR1 // DAB2 // DAB2 // DAB2 // DAB2 // CCL19 // GREM1 // OSM // MAP3K1 // PAK1 // PTPLAD1 // CSF1R // CSF1R // FCER1A // AKR…	9.43297e-11
GO:0051128	biological_process	regulation of cellular component organization	4	SPP1 // APOC1 // S100A8 // S100A9 // CD36 // CD36 // CD36 // CD36 // CD36 // CD36 // CD36 // CD36 // VAMP8 // VAMP8 // APOE // APOE // APOE // CD14 // CD14 // CD14 // CD14 // GPR65 // GNA13 // GNA13 // HCK // STMN3 // STMN3 // CAPG // PYCARD // ITGB2 // DOCK2 // DOCK2 // CCL2 // BID // PTPRJ // HCLS1 // SYK // FCER1G // FBP1 // SCYL2 // LYN // TNFSF10 // EPB41L3 // SGK1 // PLEK // DAB2 // DAB2 //…	1.1479e-10
GO:0055098	biological_process	response to low-density lipoprotein particle stimulus	5	CD36 // CD36 // CD36 // CD36 // CD36 // CD36 // CD36 // CD36 // ABCA1 // NPC1 // PPARG	1.27064e-10
GO:0010887	biological_process	negative regulation of cholesterol storage	6	ABCA1 // ABCG1 // NR1H3 // NR1H3 // NR1H3 // NR1H3 // NR1H3 // NR1H3 // NR1H3 // NR1H3 // PPARG	1.27064e-10
GO:0032493	biological_process	response to bacterial lipoprotein	6	CD36 // CD36 // CD36 // CD36 // CD36 // CD36 // CD36 // CD36 // TLR1 // TLR1 // TLR1 // TLR2	1.40462e-10
GO:0070339	biological_process	response to bacterial lipopeptide	7	CD36 // CD36 // CD36 // CD36 // CD36 // CD36 // CD36 // CD36 // TLR1 // TLR1 // TLR1 // TLR2	1.40462e-10
GO:0019886	biological_process	antigen processing and presentation of exogenous peptide antigen via MHC class II	5	IFI30 // CTSS // HLA-DRA // HLA-DQB1 // HLA-DMB // HLA-DPA1 // HLA-DRB1 // HLA-DRB1 // HLA-DRB1 // HLA-DRB1 // HLA-DRB1 // HLA-DRB1 // HLA-DRB1 // HLA-DRB1 // HLA-DRB1 // HLA-DRB1 // HLA-DRB1 // HLA-DRB1 // HLA-DRB1 // LGMN // HLA-DMA // HLA-DMA // FCER1G // HLA-DQA1 // HLA-DPB1 // CTSD // CTSL1 // AP1S2	1.42511e-10
GO:0002819	biological_process	regulation of adaptive immune response	5	SAMSN1 // SAMSN1 // PTPRC // PTPRC // PYCARD // PTPN6 // PTPN6 // PTPN6 // FCER1G // CCL19 // IL7R // IL7R // IL7R // FCER1A // CR1 // SASH3 // CD28 // IL1B // SLC11A1 // CD80 // IL12RB1 // P2RX7 // P2RX7 // TNFAIP3 // TNFAIP3 // TNFAIP3 // TNFAIP3 // JAK3 // IL10 // TGFB1 // BTK // CCR2	1.43028e-10
GO:0002695	biological_process	negative regulation of leukocyte activation	6	HMOX1 // HMOX1 // SAMSN1 // SAMSN1 // MNDA // LILRB2 // HLA-DRB1 // HLA-DRB1 // HLA-DRB1 // HLA-DRB1 // HLA-DRB1 // VSIG4 // PTPN6 // PTPN6 // PTPN6 // LYN // LYN // LST1 // NR1H3 // NR1H3 // NR1H3 // NR1H3 // NR1H3 // NR1H3 // NR1H3 // NR1H3 // CDKN2A // TNFAIP3 // TNFAIP3 // TNFAIP3 // TNFAIP3 // JAK3 // IL10 // TGFB1 // PTPN22 // PTPN22 // CCR2	1.68438e-10
GO:0097006	biological_process	regulation of plasma lipoprotein particle levels	3	APOC1 // PLA2G7 // CD36 // CD36 // CD36 // CD36 // CD36 // CD36 // CD36 // CD36 // HMOX1 // APOE // APOE // APOE // LPL // ABCA1 // ABCG1 // SOAT1 // SCARB1 // MSR1 // MSR1 // APOC2	1.99516e-10
GO:0008284	biological_process	positive regulation of cell proliferation	5	MMP12 // HMOX1 // CCL5 // HCK // CTSH // CTSH // PTPRC // PTPRC // LILRB2 // PYCARD // VCAM1 // CCL2 // PTPN6 // HCLS1 // SYK // LYN // LYN // CD86 // AIF1 // HTR2B // C5AR1 // CCL19 // CYBA // CXCR2 // RAC2 // RAC2 // RAC2 // GREM1 // IL18 // OSM // CSF1R // CSF1R // AKR1C3 // TLR4 // CORO1A // CORO1A // CORO1A // CORO1A // GRN // GRN // GRN // GRN // GRN // GRN // GRN // GRN // GRN // S1PR1 // …	2.2015e-10
GO:0030199	biological_process	collagen fibril organization	5	GREM1 // COL1A1 // ANXA2 // ANXA2 // ANXA2 // ANXA2 // ANXA2 // ANXA2 // ANXA2 // ANXA2 // ANXA2 // ANXA2 // ANXA2 // ANXA2 // ANXA2 // ANXA2 // ANXA2 // ANXA2 // ANXA2 // COL11A1 // TGFBR1 // TGFBR1 // TGFBR1	2.42059e-10
GO:0046903	biological_process	secretion	5	CHI3L1 // CD36 // CCL5 // HCK // LCP2 // SERPINA1 // MMP7 // ABCA1 // CCR1 // SYK // FCER1G // CCL8 // F13A1 // LYN // LYN // SRGN // PLEK // CCL19 // CA2 // RALA // PPBP // PAK1 // FCER1A // MYO5A // CFD // SYTL2 // HK2 // HK2 // IL1RN // MYO1F // PECAM1 // CCR7 // CCR7 // CCR7 // SCG2 // BTN3A2 // CKLF // CXCL10 // ADM // ADM // LAT2 // ANXA2 // ANXA2 // ANXA2 // ANXA2 // ANXA2 // ANXA2 // ANXA…	2.51786e-10
GO:0006909	biological_process	phagocytosis	6	IGKC // CD36 // CD36 // CD36 // CD36 // CD36 // CD36 // CD36 // CD36 // CD14 // HCK // HCK // ABCA1 // SYK // FCER1G // IRF8 // IRF8 // IRF8 // IRF8 // IRF8 // IRF8 // LYN // IGKV4-1 // AIF1 // FCN1 // BIN2 // PAK1 // COLEC12 // FGR // PLCG2 // VAV1 // NR1H3 // CORO1A // SCARB1 // PECAM1 // GRB2 // SLC11A1 // THBS1 // PTX3 // P2RX7 // P2RX7 // CD93 // ELMO1 // ELMO1 // ELMO1 // ELMO1 // ELMO1 // …	2.59979e-10
GO:0045618	biological_process	positive regulation of keratinocyte differentiation	8	PRKCH // PRKCH // PRKCH // PRKCH // PRKCH // PRKCH // PRKCH // PRKCH // PRKCH // PRKCH // PRKCH // PRKCH // CYP27B1	2.59979e-10
GO:0045684	biological_process	positive regulation of epidermis development	6	KRT17 // KRT17 // PRKCH // PRKCH // PRKCH // PRKCH // PRKCH // PRKCH // PRKCH // PRKCH // PRKCH // PRKCH // PRKCH // PRKCH // CYP27B1 // HPSE	3.40122e-10
GO:0006873	biological_process	cellular ion homeostasis	6	S100A8 // CD52 // S100A9 // HMOX1 // CCL5 // APOE // APOE // APOE // CP // CP // CP // CP // CP // C3AR1 // CXCR4 // PTPRC // PTPRC // CCR5 // CCL2 // CCR1 // CCL8 // HAMP // GNA15 // EPB41L3 // HTR2B // C5AR1 // CCL19 // CXCR2 // CXCR2 // CXCR2 // CXCR2 // CXCR2 // ATP6V1F // MYO5A // TBXAS1 // TBXAS1 // TBXAS1 // TBXAS1 // CX3CR1 // CX3CR1 // CX3CR1 // PLCG2 // PLCG2 // SOD2 // SOD2 // SOD2 // …	3.41626e-10
GO:0042108	biological_process	positive regulation of cytokine biosynthetic process	7	HMOX1 // SYK // CD86 // TLR1 // TLR1 // TLR1 // TLR1 // TLR1 // TLR2 // TLR7 // FCER1A // TLR4 // CD28 // CD28 // IL1B // IL1B // IL1B // IL1B // CD80 // THBS1 // CD4 // MYD88 // MYD88 // TLR8 // CCR2	3.6637e-10
GO:0055094	biological_process	response to lipoprotein particle stimulus	4	CD36 // CD36 // CD36 // CD36 // CD36 // CD36 // CD36 // CD36 // ABCA1 // ABCG1 // NPC1 // PPARG	4.28602e-10
GO:0001525	biological_process	angiogenesis	10	HMOX1 // HMOX1 // GNA13 // GNA13 // CXCR4 // ANPEP // CCL2 // SYK // IL8 // GREM1 // IL18 // TYMP // S1PR1 // SAT1 // STK4 // SCG2 // SCG2 // SCG2 // CYP1B1 // NRP2 // NRP2 // NRP2 // NRP2 // PLXDC1 // FLT1 // PRKX // ANXA2 // ANXA2 // ANXA2 // ANXA2 // ANXA2 // ANXA2 // ANXA2 // ANXA2 // ANXA2 // ANXA2 // ANXA2 // ANXA2 // ANXA2 // ANXA2 // ANXA2 // ANXA2 // ANXA2 // THBS1 // CXCL12 // ESM1 // S…	4.28602e-10
GO:0032649	biological_process	regulation of interferon-gamma production	5	PYCARD // HLA-DRB1 // HLA-DRB1 // HLA-DRB1 // HLA-DRB1 // HLA-DRB1 // IRF8 // IRF8 // IRF8 // IRF8 // IRF8 // IRF8 // TLR7 // IL18 // TLR4 // CCR7 // CCR7 // CCR7 // SASH3 // IL1B // SLC11A1 // ISG15 // IL12RB1 // TLR8 // IL10 // CCR2	4.56779e-10
GO:0055082	biological_process	cellular chemical homeostasis	5	S100A8 // CD52 // S100A9 // HMOX1 // CCL5 // APOE // APOE // APOE // CP // CP // CP // CP // CP // C3AR1 // CXCR4 // PTPRC // PTPRC // VCAM1 // CCR5 // CCL2 // CCR1 // CCL8 // HAMP // GNA15 // EPB41L3 // HTR2B // C5AR1 // CCL19 // CYBA // CXCR2 // CXCR2 // CXCR2 // CXCR2 // CXCR2 // ATP6V1F // MYO5A // TBXAS1 // TBXAS1 // TBXAS1 // TBXAS1 // CX3CR1 // CX3CR1 // CX3CR1 // PLCG2 // PLCG2 // HK2 // …	4.80038e-10
GO:0031348	biological_process	negative regulation of defense response	6	ACP5 // ACP5 // ACP5 // APOE // APOE // APOE // HLA-DRB1 // CR1 // NR1H3 // NR1H3 // NR1H3 // NR1H3 // NR1H3 // NR1H3 // NR1H3 // NR1H3 // ARRB2 // TNFRSF1B // AOAH // IRAK3 // PPARG // PPARG // PPARG // PPARG // IFI16 // MICB // TNFAIP3 // TNFAIP3 // TNFAIP3 // TNFAIP3 // IL10	4.92421e-10
GO:0007243	biological_process	intracellular protein kinase cascade	6	HMOX1 // CCL5 // CD14 // GNA13 // GNA13 // CTSH // LY96 // CCR5 // CCL2 // PTPN6 // SYK // RASGRP3 // LYN // HTR2B // TLR2 // TLR7 // PLEK // DAB2 // DAB2 // DAB2 // DAB2 // CCL19 // FYB // IL18 // OSM // OSM // PAK1 // PTPLAD1 // PTPLAD1 // PTPLAD1 // FCER1A // TLR4 // MAPK13 // STK4 // STK17B // SCG2 // IFNAR2 // PRKCH // PRKCH // PRKCH // PRKCH // PRKCH // PRKCH // PRKCH // PRKCH // PRKCH // P…	5.14311e-10
GO:0070391	biological_process	response to lipoteichoic acid	6	CD36 // CD36 // CD36 // CD36 // CD36 // CD36 // CD36 // CD36 // CD14 // TLR2 // TLR4	5.19138e-10
GO:0071223	biological_process	cellular response to lipoteichoic acid	7	CD36 // CD36 // CD36 // CD36 // CD36 // CD36 // CD36 // CD36 // CD14 // TLR2 // TLR4	5.19138e-10
GO:0032652	biological_process	regulation of interleukin-1 production	5	ACP5 // ACP5 // ACP5 // PYCARD // CASP1 // CCL19 // IL18 // TLR4 // ARRB2 // ARRB2 // CCR7 // CCR7 // CCR7 // IFI16 // P2RX7 // P2RX7 // TNFAIP3 // TNFAIP3 // TNFAIP3 // TNFAIP3 // F2R	5.97299e-10
GO:0045606	biological_process	positive regulation of epidermal cell differentiation	7	PRKCH // PRKCH // PRKCH // PRKCH // PRKCH // PRKCH // PRKCH // PRKCH // PRKCH // PRKCH // PRKCH // PRKCH // CYP27B1	6.17554e-10
GO:0042060	biological_process	wound healing	4	MMP12 // S100A8 // CD36 // HMOX1 // TREM1 // GNA13 // GNA13 // HBB // LCP2 // APBB1IP // MMP1 // SERPINA1 // ITGB2 // ITGAM // ITGAX // PTPN6 // PTPRJ // SYK // FCER1G // F13A1 // F13A1 // SLC16A3 // LYN // SRGN // GNA15 // ATP1B1 // PLEK // CD48 // RASGRP1 // RAC2 // MAP3K1 // PLAUR // PPBP // PAK1 // CD84 // CD2 // FGR // PLCG2 // CFD // VAV1 // ARRB2 // SCARB1 // PECAM1 // PROCR // PLAT // PLA…	7.03505e-10
GO:0048520	biological_process	positive regulation of behavior	5	PLA2G7 // CCL5 // C3AR1 // C3AR1 // CCL2 // CCR1 // PTPRJ // AIF1 // IL8 // IL8 // CCL19 // CCL7 // S1PR1 // CCR7 // CCR7 // CCR7 // SCG2 // CCL4 // CXCL10 // NCKAP1L // THBS1 // CXCL12 // SERPINE1 // CAMK1D // TGFB1 // VEGFC // CCR2 // CCR2	7.23129e-10
GO:0043410	biological_process	positive regulation of MAPK cascade	8	CHI3L1 // CD36 // CD36 // CD36 // CD36 // CD36 // CD36 // CD36 // CD36 // CXCR4 // PTPRC // PTPRC // PYCARD // TIMP2 // TIMP2 // CCR1 // SYK // HTR2B // C5AR1 // DAB2 // DAB2 // DAB2 // DAB2 // CCL19 // OSM // PAK1 // PTPLAD1 // CSF1R // CSF1R // FCER1A // TLR4 // IL1RN // ARRB2 // ARRB2 // CCR7 // GPR183 // FPR1 // MAP3K2 // IL1B // IL1B // IL1B // IL1B // FLT1 // CSK // CSK // CSK // CSK // ADR…	7.57207e-10
GO:0009595	biological_process	detection of biotic stimulus	3	LY96 // HLA-DRB1 // HLA-DRB1 // HLA-DRB1 // HLA-DRB1 // HLA-DRB1 // TLR1 // TLR1 // TLR1 // HLA-B // TLR2 // TLR4 // SCARB1 // CD1D // CRTAM	9.00036e-10
GO:0009966	biological_process	regulation of signal transduction	5	CHI3L1 // CD36 // CD36 // CD36 // CD36 // CD36 // CD36 // CD36 // CD36 // HMOX1 // CCL5 // APOE // GPR65 // STMN3 // STMN3 // CXCR4 // PTPRC // PTPRC // RGS1 // PYCARD // ABCA1 // TIMP2 // TIMP2 // CCR1 // BID // PTPN6 // PTPN6 // PTPN6 // PTPRJ // HCLS1 // IQGAP2 // SYK // FBP1 // SCYL2 // CASP1 // RASGRP3 // RASGRP3 // RASGRP3 // RASGRP3 // RASGRP3 // LYN // LYN // TNFSF10 // IL8 // HTR2B // TL…	9.28554e-10
GO:0019915	biological_process	lipid storage	4	CD36 // CD36 // CD36 // CD36 // CD36 // CD36 // CD36 // CD36 // PLIN2 // PLIN2 // NRIP1 // NRIP1 // SOAT1 // HEXB // HEXB // HEXB // IL1B	9.3859e-10
GO:0072358	biological_process	cardiovascular system development	6	HMOX1 // HMOX1 // APOE // APOE // APOE // GNA13 // GNA13 // CXCR4 // ANPEP // VCAM1 // CCL2 // PTPRJ // SYK // IL8 // HTR2B // GREM1 // IL18 // ADAP2 // TYMP // SOD2 // SOD2 // SOD2 // PECAM1 // S1PR1 // SAT1 // STK4 // PDPN // PDPN // SCG2 // SCG2 // SCG2 // SPI1 // CYP1B1 // ITGA4 // ITGA4 // NRP2 // NRP2 // NRP2 // NRP2 // PLXDC1 // COL1A1 // FLT1 // ADM // ADM // PRKX // ZMIZ1 // HHEX // HHEX…	1.12533e-09
GO:0072359	biological_process	circulatory system development	5	HMOX1 // HMOX1 // APOE // APOE // APOE // GNA13 // GNA13 // CXCR4 // ANPEP // VCAM1 // CCL2 // PTPRJ // SYK // IL8 // HTR2B // GREM1 // IL18 // ADAP2 // TYMP // SOD2 // SOD2 // SOD2 // PECAM1 // S1PR1 // SAT1 // STK4 // PDPN // PDPN // SCG2 // SCG2 // SCG2 // SPI1 // CYP1B1 // ITGA4 // ITGA4 // NRP2 // NRP2 // NRP2 // NRP2 // PLXDC1 // COL1A1 // FLT1 // ADM // ADM // PRKX // ZMIZ1 // HHEX // HHEX…	1.12533e-09
GO:0044707	biological_process	single-multicellular organism process	2	SPP1 // SPP1 // MMP12 // APOC1 // S100A8 // CHI3L1 // MMP9 // S100A9 // PLA2G7 // C1QB // C1QB // C1QB // C1QB // ACP5 // ACP5 // ACP5 // CD36 // CD36 // CD36 // CD36 // CD36 // CD36 // CD36 // CD36 // HMOX1 // HMOX1 // TYROBP // APOE // APOE // APOE // GPR65 // TREM1 // CSTA // C3AR1 // GNA13 // GNA13 // HBB // STMN3 // STMN3 // LPL // CXCR4 // KRT14 // LCP2 // TMEM176B // CTSH // CTSH // APBB1I…	1.1464e-09
GO:0061081	biological_process	positive regulation of myeloid leukocyte cytokine production involved in immune response	8	CD36 // CD36 // CD36 // CD36 // CD36 // CD36 // CD36 // CD36 // FCER1G // TLR2 // TLR4 // MIF	1.1464e-09
GO:0032651	biological_process	regulation of interleukin-1 beta production	6	ACP5 // ACP5 // ACP5 // PYCARD // CASP1 // CCL19 // IL18 // ARRB2 // ARRB2 // CCR7 // CCR7 // CCR7 // IFI16 // P2RX7 // P2RX7 // TNFAIP3 // TNFAIP3 // TNFAIP3 // TNFAIP3 // F2R	1.28367e-09
GO:0032370	biological_process	positive regulation of lipid transport	6	APOE // ABCA1 // ABCG1 // NR1H3 // NR1H3 // NR1H3 // NR1H3 // NR1H3 // NR1H3 // NR1H3 // NR1H3 // IL1B // IL1B // IL1B // IL1B // P2RX4 // MIF // P2RX7 // P2RX7	1.30621e-09
GO:0002755	biological_process	MyD88-dependent toll-like receptor signaling pathway	12	CD36 // CD14 // LY96 // TLR1 // TLR1 // TLR1 // TLR2 // TLR7 // MAP3K1 // TLR4 // TLR5 // IRAK3 // RPS6KA1 // MYD88 // MYD88 // MYD88 // MYD88 // MYD88 // TLR8 // TLR8 // MAPKAPK3 // CDK1 // DUSP4 // DUSP6 // BTK	1.33283e-09
GO:0043408	biological_process	regulation of MAPK cascade	7	CHI3L1 // CD36 // CD36 // CD36 // CD36 // CD36 // CD36 // CD36 // CD36 // APOE // CXCR4 // PTPRC // PTPRC // PYCARD // TIMP2 // TIMP2 // CCR1 // PTPN6 // PTPN6 // PTPN6 // PTPRJ // SYK // LYN // LYN // HTR2B // C5AR1 // DAB2 // DAB2 // DAB2 // DAB2 // CCL19 // GREM1 // OSM // MAP3K1 // PAK1 // PTPLAD1 // CSF1R // CSF1R // FCER1A // TLR4 // IL1RN // ARRB2 // ARRB2 // CCR7 // GPR183 // GRB2 // GRB2…	1.46538e-09
GO:0007229	biological_process	integrin-mediated signaling pathway	6	TYROBP // HCK // ITGB2 // ITGB2 // ITGB2 // ITGB2 // ITGB2 // ITGB2 // ITGB2 // ITGB2 // ITGB2 // ITGB2 // ITGB2 // ITGAM // ITGAX // ITGAX // SYK // FCER1G // PLEK // FGR // FGR // ADAM28 // ITGA4 // ITGA4 // ITGAL // ITGAL // ITGAL // ITGB7 // ITGB7 // ITGB7 // ITGB7 // ITGB7 // ITGB7	1.53558e-09
GO:0006907	biological_process	pinocytosis	6	PYCARD // DOCK2 // DOCK2 // DAB2 // DAB2 // DAB2 // DAB2 // MAPKAPK3 // MAPKAPK3 // MAPKAPK3 // PPT1	1.73764e-09
GO:0071220	biological_process	cellular response to bacterial lipoprotein	7	CD36 // CD36 // CD36 // CD36 // CD36 // CD36 // CD36 // CD36 // TLR1 // TLR2	1.75208e-09
GO:0071221	biological_process	cellular response to bacterial lipopeptide	8	CD36 // CD36 // CD36 // CD36 // CD36 // CD36 // CD36 // CD36 // TLR1 // TLR2	1.75208e-09
GO:0007596	biological_process	blood coagulation	5	CD36 // TREM1 // GNA13 // GNA13 // HBB // LCP2 // APBB1IP // MMP1 // SERPINA1 // ITGB2 // ITGAM // ITGAX // PTPN6 // PTPRJ // SYK // FCER1G // F13A1 // F13A1 // SLC16A3 // LYN // SRGN // GNA15 // ATP1B1 // PLEK // CD48 // RASGRP1 // RAC2 // PLAUR // PPBP // CD84 // CD2 // FGR // PLCG2 // CFD // VAV1 // ARRB2 // PECAM1 // PROCR // PLAT // SLC7A7 // GRB2 // PLAU // PRKCH // ITGA4 // COL1A1 // SELL …	2.02876e-09
GO:0050817	biological_process	coagulation	3	CD36 // TREM1 // GNA13 // GNA13 // HBB // LCP2 // APBB1IP // MMP1 // SERPINA1 // ITGB2 // ITGAM // ITGAX // PTPN6 // PTPRJ // SYK // FCER1G // F13A1 // F13A1 // SLC16A3 // LYN // SRGN // GNA15 // ATP1B1 // PLEK // CD48 // RASGRP1 // RAC2 // PLAUR // PPBP // CD84 // CD2 // FGR // PLCG2 // CFD // VAV1 // ARRB2 // PECAM1 // PROCR // PLAT // SLC7A7 // GRB2 // PLAU // PRKCH // ITGA4 // COL1A1 // SELL …	2.02876e-09
GO:2000026	biological_process	regulation of multicellular organismal development	4	SPP1 // CHI3L1 // HMOX1 // HMOX1 // APOE // APOE // APOE // C3AR1 // C3AR1 // CXCR4 // TMEM176B // CTSH // CTSH // PTPRC // PTPRC // LILRB2 // LILRB4 // CCL2 // TIMP2 // TIMP2 // CCR1 // PTPN6 // PTPN6 // PTPN6 // HCLS1 // SYK // HLA-DMA // HLA-DMA // LYN // LYN // VNN1 // CD86 // SRGN // BMP2K // HLA-B // DAB2 // DAB2 // DAB2 // DAB2 // CCL19 // CA2 // GREM1 // IL7R // IL7R // IL7R // CD2 // CX3…	2.07655e-09
GO:0048519	biological_process	negative regulation of biological process	3	SPP1 // APOC1 // IFI30 // BCL2A1 // ACP5 // ACP5 // ACP5 // CD36 // CD36 // CD36 // CD36 // CD36 // CD36 // CD36 // CD36 // HMOX1 // HMOX1 // ADAMDEC1 // CCL5 // APOE // APOE // APOE // GMFG // SAMSN1 // SAMSN1 // HCK // STMN3 // STMN3 // TMEM176B // MNDA // CTSH // CTSH // PTPRC // PTPRC // RGS1 // CAPG // LILRB2 // PYCARD // HLA-DRB1 // HLA-DRB1 // HLA-DRB1 // HLA-DRB1 // HLA-DRB1 // CCR5 // LI…	2.15947e-09
GO:0090322	biological_process	regulation of superoxide metabolic process	6	ACP5 // ACP5 // ACP5 // CD36 // CD36 // CD36 // CD36 // CD36 // CD36 // CD36 // CD36 // SYK // IL18 // TGFB1	2.3222e-09
GO:0032368	biological_process	regulation of lipid transport	5	APOC1 // APOE // ABCA1 // SYK // ABCG1 // NR1H3 // NR1H3 // NR1H3 // NR1H3 // NR1H3 // NR1H3 // NR1H3 // NR1H3 // APOC2 // IL1B // IL1B // IL1B // IL1B // P2RX4 // THBS1 // PPARG // MIF // P2RX7 // P2RX7	2.37163e-09
GO:0010886	biological_process	positive regulation of cholesterol storage	6	CD36 // CD36 // CD36 // CD36 // CD36 // CD36 // CD36 // CD36 // LPL // SCARB1 // MSR1 // MSR1	2.8193e-09
GO:0010935	biological_process	regulation of macrophage cytokine production	7	CD36 // CD36 // CD36 // CD36 // CD36 // CD36 // CD36 // CD36 // TLR2 // TLR4 // IRAK3 // TGFB1	2.8193e-09
GO:0051179	biological_process	localization	1	SPP1 // MMP12 // APOC1 // S100A8 // CHI3L1 // S100A9 // IGKC // CD36 // CD36 // CD36 // CD36 // CD36 // CD36 // CD36 // CD36 // VAMP8 // VAMP8 // VAMP8 // HMOX1 // LAPTM5 // CCL5 // APOE // APOE // APOE // APOE // CP // CP // CP // CP // CP // CD14 // TREM1 // HBB // HCK // HCK // CXCR4 // LCP2 // PTPRC // PTPRC // MMP1 // SNX10 // SERPINA1 // PYCARD // MMP7 // ITGB2 // ITGAM // VCAM1 // SLC14A1 …	2.97209e-09
GO:0002822	biological_process	regulation of adaptive immune response based on somatic recombination of immune receptors built from immunoglobulin superfamily domains	6	PTPRC // PTPRC // PTPN6 // PTPN6 // PTPN6 // FCER1G // CCL19 // IL7R // IL7R // IL7R // FCER1A // CR1 // SASH3 // CD28 // IL1B // SLC11A1 // CD80 // IL12RB1 // P2RX7 // P2RX7 // TNFAIP3 // TNFAIP3 // TNFAIP3 // TNFAIP3 // JAK3 // IL10 // TGFB1 // BTK // CCR2	3.11926e-09
GO:0007599	biological_process	hemostasis	4	CD36 // TREM1 // GNA13 // GNA13 // HBB // LCP2 // APBB1IP // MMP1 // SERPINA1 // ITGB2 // ITGAM // ITGAX // PTPN6 // PTPRJ // SYK // FCER1G // F13A1 // F13A1 // SLC16A3 // LYN // SRGN // GNA15 // ATP1B1 // PLEK // CD48 // RASGRP1 // RAC2 // PLAUR // PPBP // CD84 // CD2 // FGR // PLCG2 // CFD // VAV1 // ARRB2 // PECAM1 // PROCR // PLAT // SLC7A7 // GRB2 // PLAU // PRKCH // ITGA4 // COL1A1 // SELL …	3.27368e-09
GO:0016032	biological_process	viral reproduction	3	HCK // CXCR4 // MMP1 // ANPEP // FCGR2B // VCAM1 // DOCK2 // CCR5 // CCL2 // SYK // PILRA // LYN // CLEC5A // CD86 // HLA-B // HLA-B // HLA-B // HLA-B // HLA-B // HLA-B // HLA-B // HLA-B // HLA-B // HLA-B // HLA-B // HLA-B // HLA-B // HLA-B // HLA-B // HLA-B // HLA-B // HLA-B // HLA-B // HLA-B // HLA-B // HLA-B // HLA-B // HLA-B // HLA-B // HLA-B // HLA-B // HLA-B // HLA-B // HLA-B // HLA-B // HL…	3.73981e-09
GO:0051046	biological_process	regulation of secretion	5	HMOX1 // HMOX1 // CD14 // CD14 // CD14 // CD14 // PYCARD // HLA-DRB1 // HLA-DRB1 // HLA-DRB1 // HLA-DRB1 // HLA-DRB1 // SYK // FCER1G // CASP1 // LYN // LYN // CLEC5A // SRGN // TLR1 // TLR1 // TLR1 // HTR2B // TLR2 // SGK1 // CCL19 // RALA // RALA // OSM // CSF1R // FCER1A // FGR // FGR // NR1H3 // NR1H3 // NR1H3 // NR1H3 // NR1H3 // NR1H3 // NR1H3 // NR1H3 // TLR4 // IL1RN // MARCKS // CCR7 // …	3.93919e-09
GO:0050795	biological_process	regulation of behavior	4	PLA2G7 // CCL5 // C3AR1 // C3AR1 // CXCR4 // CCL2 // CCR1 // PTPRJ // LYN // AIF1 // IL8 // IL8 // HTR2B // CCL19 // GREM1 // CCL7 // S1PR1 // CCR7 // CCR7 // CCR7 // SCG2 // CCL4 // CXCL10 // NCKAP1L // PDGFRA // THBS1 // CXCL12 // SERPINE1 // MPP1 // MPP1 // CAMK1D // TGFB1 // VEGFC // CCR2 // CCR2	4.21196e-09
GO:0044764	biological_process	multi-organism cellular process	2	HCK // CXCR4 // MMP1 // ANPEP // FCGR2B // VCAM1 // DOCK2 // CCR5 // CCL2 // SYK // PILRA // LYN // CLEC5A // CD86 // HLA-B // HLA-B // HLA-B // HLA-B // HLA-B // HLA-B // HLA-B // HLA-B // HLA-B // HLA-B // HLA-B // HLA-B // HLA-B // HLA-B // HLA-B // HLA-B // HLA-B // HLA-B // HLA-B // HLA-B // HLA-B // HLA-B // HLA-B // HLA-B // HLA-B // HLA-B // HLA-B // HLA-B // HLA-B // HLA-B // HLA-B // HL…	4.23308e-09
GO:0032715	biological_process	negative regulation of interleukin-6 production	6	TLR4 // ARRB2 // ARRB2 // CSK // CSK // CSK // CSK // NCKAP1L // IRAK3 // TNFAIP3 // TNFAIP3 // TNFAIP3 // TNFAIP3 // IL10	4.265e-09
GO:0050801	biological_process	ion homeostasis	5	S100A8 // CD52 // S100A9 // HMOX1 // CCL5 // APOE // APOE // APOE // CP // CP // CP // CP // CP // C3AR1 // CXCR4 // PTPRC // PTPRC // CCR5 // CCL2 // STEAP4 // CCR1 // CCL8 // HAMP // GNA15 // EPB41L3 // HTR2B // C5AR1 // CCL19 // CXCR2 // CXCR2 // CXCR2 // CXCR2 // CXCR2 // ATP6V1F // XIAP // MYO5A // TBXAS1 // TBXAS1 // TBXAS1 // TBXAS1 // CX3CR1 // CX3CR1 // CX3CR1 // PLCG2 // PLCG2 // SOD2 /…	4.49051e-09
GO:2000242	biological_process	negative regulation of reproductive process	4	CCL5 // OAS1 // OSM // OSM // APOBEC3G // OAS3 // MX1 // CCL4 // TPST2 // TPST2 // TPST2 // TPST2 // TPST2 // TPST2 // ISG15 // PLSCR1 // APOBEC3C // IFI16 // TIMP1 // IFITM1 // EAF2 // EAF2 // SERPINF1 // SERPINF1 // SERPINF1 // SERPINF1 // SERPINF1 // SERPINF1	4.81601e-09
GO:0071402	biological_process	cellular response to lipoprotein particle stimulus	6	CD36 // CD36 // CD36 // CD36 // CD36 // CD36 // CD36 // CD36 // NPC1	4.97011e-09
GO:0071404	biological_process	cellular response to low-density lipoprotein particle stimulus	7	CD36 // CD36 // CD36 // CD36 // CD36 // CD36 // CD36 // CD36 // NPC1	4.97011e-09
GO:0060099	biological_process	regulation of phagocytosis, engulfment	8	CD36 // CD36 // CD36 // CD36 // CD36 // CD36 // CD36 // CD36 // NCKAP1L	4.97011e-09
GO:0060100	biological_process	positive regulation of phagocytosis, engulfment	9	CD36 // CD36 // CD36 // CD36 // CD36 // CD36 // CD36 // CD36 // NCKAP1L	4.97011e-09
GO:0032501	biological_process	multicellular organismal process	1	SPP1 // SPP1 // MMP12 // APOC1 // S100A8 // CHI3L1 // MMP9 // S100A9 // PLA2G7 // C1QB // C1QB // C1QB // C1QB // ACP5 // ACP5 // ACP5 // CD36 // CD36 // CD36 // CD36 // CD36 // CD36 // CD36 // CD36 // HMOX1 // HMOX1 // TYROBP // APOE // APOE // APOE // GPR65 // TREM1 // CSTA // C3AR1 // GNA13 // GNA13 // HBB // STMN3 // STMN3 // LPL // CXCR4 // KRT14 // LCP2 // TMEM176B // CTSH // CTSH // APBB1I…	5.06492e-09
GO:0060341	biological_process	regulation of cellular localization	4	CD36 // CD36 // CD36 // CD36 // CD36 // CD36 // CD36 // CD36 // HMOX1 // HMOX1 // CD14 // CD14 // CD14 // CD14 // LCP1 // PYCARD // HLA-DRB1 // HLA-DRB1 // HLA-DRB1 // HLA-DRB1 // HLA-DRB1 // BID // HCLS1 // SYK // FCER1G // CASP1 // LYN // LYN // CLEC5A // SRGN // TLR1 // TLR1 // TLR1 // HTR2B // TLR2 // TLR7 // DAB2 // CCL19 // RALA // RALA // GREM1 // OSM // CSF1R // GZMB // FCER1A // FGR // F…	6.00897e-09
GO:0050853	biological_process	B cell receptor signaling pathway	10	MNDA // PTPRC // PTPRC // PTPN6 // PTPN6 // PTPN6 // SYK // LYN // LYN // PLCG2 // PLCG2 // NCKAP1L // LAT2 // LCK // LCK // BTK	6.84717e-09
GO:0009719	biological_process	response to endogenous stimulus	2	SPP1 // CTSS // CD36 // CD36 // CD36 // CD36 // CD36 // CD36 // CD36 // CD36 // HMOX1 // HMOX1 // CCL5 // APOE // APOE // APOE // CTSH // CTSH // CTSB // NCF2 // NCF2 // NCF2 // ABCA1 // CCL2 // BID // PTPN6 // KYNU // HCLS1 // ABCG1 // CASP1 // LYN // LYN // CD86 // UCP2 // UCP2 // IL8 // TLR2 // C5AR1 // DAB2 // DAB2 // DAB2 // DAB2 // CCL19 // CYBA // CA2 // ATP6V1F // IL18 // MAP3K1 // PAK1 /…	9.66759e-09
GO:2000332	biological_process	regulation of blood microparticle formation	5	CD36 // CD36 // CD36 // CD36 // CD36 // CD36 // CD36 // CD36	9.66759e-09
GO:2000334	biological_process	positive regulation of blood microparticle formation	6	CD36 // CD36 // CD36 // CD36 // CD36 // CD36 // CD36 // CD36	9.66759e-09
GO:0002260	biological_process	lymphocyte homeostasis	6	LYN // LYN // CORO1A // CORO1A // CORO1A // CORO1A // BCL2L11 // BCL2L11 // BCL2L11 // CCNB2 // NCKAP1L // P2RX7 // P2RX7 // TNFAIP3 // TNFAIP3 // TNFAIP3 // TNFAIP3 // JAK3 // TGFB1 // HIF1A // HIF1A	9.66759e-09
GO:0090341	biological_process	negative regulation of secretion of lysosomal enzymes	9	NR1H3 // NR1H3 // NR1H3 // NR1H3 // NR1H3 // NR1H3 // NR1H3 // NR1H3	9.66759e-09
GO:0022603	biological_process	regulation of anatomical structure morphogenesis	4	SPP1 // CHI3L1 // CD36 // CD36 // CD36 // CD36 // CD36 // CD36 // CD36 // CD36 // HMOX1 // HMOX1 // APOE // APOE // APOE // C3AR1 // C3AR1 // GNA13 // GNA13 // HCK // CTSH // CTSH // ITGB2 // CCL2 // EPB41L3 // DAB2 // DAB2 // DAB2 // DAB2 // GREM1 // IL18 // CSF1R // CSF1R // FGR // FGR // CX3CR1 // CX3CR1 // CX3CR1 // LST1 // CORO1A // CORO1A // CORO1A // CORO1A // CCL7 // IL1RN // STAB1 // PDP…	1.28571e-08
GO:0050729	biological_process	positive regulation of inflammatory response	7	S100A8 // S100A9 // PLA2G7 // FCER1G // TLR2 // TLR7 // ALOX5AP // IL18 // FABP4 // OSM // FCER1A // TLR4 // MAPK13 // CCR7 // CCR7 // CCR7 // CD28 // IL1B // IL1B // IL1B // IL1B // SERPINE1 // S100A12 // CCR2	1.31036e-08
GO:0008360	biological_process	regulation of cell shape	6	GNA13 // GNA13 // HCK // ITGB2 // CCL2 // EPB41L3 // CSF1R // CSF1R // FGR // FGR // LST1 // CORO1A // CORO1A // CORO1A // CORO1A // CCL7 // PDPN // HEXB // HEXB // HEXB // ARHGAP15 // GAS7 // GAS7 // GAS7 // GAS7 // GAS7 // GAS7 // GAS7 // ICAM1 // CCL13 // FGD6 // FMNL1	1.33244e-08
GO:0010876	biological_process	lipid localization	3	APOC1 // CD36 // CD36 // CD36 // CD36 // CD36 // CD36 // CD36 // CD36 // APOE // APOE // APOE // APOE // ABCA1 // ABCG1 // PLTP // PLIN2 // PLIN2 // NPC2 // NRIP1 // NRIP1 // SOAT1 // SCARB1 // OSBPL3 // MSR1 // MSR1 // NPC1 // NPC1 // NPC1 // HEXB // HEXB // HEXB // APOC2 // APOC2 // APOC2 // IL1B // SLCO2A1 // ACE // PPARG // PPARG // PPARG // PPARG // PSAP // P2RX7 // P2RX7	1.43375e-08
GO:0002718	biological_process	regulation of cytokine production involved in immune response	6	CD36 // CD36 // CD36 // CD36 // CD36 // CD36 // CD36 // CD36 // HMOX1 // HMOX1 // FCER1G // TLR2 // TLR4 // SASH3 // IRAK3 // MIF // JAK3 // IL10 // TGFB1 // BTK	1.66754e-08
GO:0045058	biological_process	T cell selection	11	PTPRC // PTPRC // DOCK2 // DOCK2 // SYK // HLA-DMA // HLA-DMA // CD3D // CCR7 // CCR7 // CCR7 // CD28 // CD1D // CD4 // BCL11B	2.07037e-08
GO:0010646	biological_process	regulation of cell communication	4	CHI3L1 // CD36 // CD36 // CD36 // CD36 // CD36 // CD36 // CD36 // CD36 // HMOX1 // CCL5 // APOE // GPR65 // STMN3 // STMN3 // CXCR4 // PTPRC // PTPRC // RGS1 // PYCARD // HLA-DRB1 // HLA-DRB1 // HLA-DRB1 // HLA-DRB1 // HLA-DRB1 // ABCA1 // CCL2 // TIMP2 // TIMP2 // CCR1 // BID // PTPN6 // PTPN6 // PTPN6 // PTPRJ // HCLS1 // IQGAP2 // SYK // FBP1 // SCYL2 // CASP1 // RASGRP3 // RASGRP3 // RASGRP3 …	2.17411e-08
GO:0016337	biological_process	cell-cell adhesion	4	S100A8 // S100A9 // CCL5 // CSTA // PTPRC // PTPRC // LILRB2 // ITGB2 // ITGAM // VCAM1 // VCAM1 // SYK // VNN1 // PLEK // CD84 // CD2 // PDPN // PDPN // SIGLEC1 // DSC2 // SELE // CYP1B1 // IL1B // ITGA4 // ITGA4 // CD1D // SELPLG // ICAM3 // ICAM3 // ICAM3 // ITGAL // ITGAL // ITGAL // PDGFRA // CDH5 // CDH5 // CDH5 // CDH5 // CBLL1 // CLDN1 // NTN1 // OLR1 // OLR1 // OLR1 // OLR1 // OLR1 // OL…	2.49973e-08
GO:0043085	biological_process	positive regulation of catalytic activity	5	S100A8 // CHI3L1 // S100A9 // CCL5 // APOE // GPR65 // GMFG // GNA13 // CXCR4 // CTSH // PTPRC // PTPRC // RGS1 // PYCARD // CCL2 // TIMP2 // TIMP2 // SYK // CASP1 // RASGRP3 // LYN // LYN // TNFSF10 // GNA15 // IL8 // HTR2B // IFI27 // C5AR1 // PLEK // DAB2 // DAB2 // DAB2 // DAB2 // CCL19 // GREM1 // MAP3K1 // PAK1 // PTPLAD1 // CSF1R // CSF1R // FCER1A // CR1 // DNAJC3 // ADAP2 // FGR // NR1H3…	2.57664e-08
GO:0050728	biological_process	negative regulation of inflammatory response	7	ACP5 // ACP5 // ACP5 // APOE // APOE // APOE // HLA-DRB1 // NR1H3 // NR1H3 // NR1H3 // NR1H3 // NR1H3 // NR1H3 // NR1H3 // NR1H3 // TNFRSF1B // AOAH // PPARG // PPARG // PPARG // PPARG // TNFAIP3 // TNFAIP3 // TNFAIP3 // TNFAIP3 // IL10	2.60797e-08
GO:0060457	biological_process	negative regulation of digestive system process	6	NR1H3 // NR1H3 // NR1H3 // NR1H3 // NR1H3 // NR1H3 // NR1H3 // NR1H3 // OXTR // OXTR // OXTR	3.09953e-08
GO:0034381	biological_process	plasma lipoprotein particle clearance	4	APOC1 // CD36 // CD36 // CD36 // CD36 // CD36 // CD36 // CD36 // CD36 // HMOX1 // APOE // SCARB1 // MSR1 // MSR1 // APOC2	3.25782e-08
GO:0023051	biological_process	regulation of signaling	3	CHI3L1 // CD36 // CD36 // CD36 // CD36 // CD36 // CD36 // CD36 // CD36 // HMOX1 // CCL5 // APOE // GPR65 // STMN3 // STMN3 // CXCR4 // PTPRC // PTPRC // RGS1 // PYCARD // HLA-DRB1 // HLA-DRB1 // HLA-DRB1 // HLA-DRB1 // HLA-DRB1 // ABCA1 // CCL2 // TIMP2 // TIMP2 // CCR1 // BID // PTPN6 // PTPN6 // PTPN6 // PTPRJ // HCLS1 // IQGAP2 // SYK // FBP1 // SCYL2 // CASP1 // RASGRP3 // RASGRP3 // RASGRP3 …	3.40875e-08
GO:0070528	biological_process	protein kinase C signaling cascade	7	HTR2B // PLEK // PRKCH // PRKCH // PRKCH // PRKCH // PRKCH // PRKCH // PRKCH // PRKCH // PRKCH // PRKCH // PRKCH // PRKCH	3.81025e-08
GO:0030168	biological_process	platelet activation	6	CD36 // GNA13 // GNA13 // LCP2 // APBB1IP // SERPINA1 // SYK // FCER1G // F13A1 // LYN // SRGN // GNA15 // PLEK // RASGRP1 // RAC2 // PPBP // PLCG2 // CFD // VAV1 // ARRB2 // PECAM1 // GRB2 // PRKCH // COL1A1 // CSK // PDGFRA // THBS1 // PLSCR1 // TIMP1 // SERPINE1 // IGF1 // PSAP // DGKZ // LCK // TGFB1 // VEGFC // F2R // PF4	5.38112e-08
GO:0046850	biological_process	regulation of bone remodeling	5	SPP1 // SYK // CA2 // GREM1 // CSF1R // TNFRSF11B // CSK // CSK // CSK // CSK // TFRC // TFRC // TFRC // P2RX7 // P2RX7 // TNFAIP3	5.54375e-08
GO:0043122	biological_process	regulation of I-kappaB kinase/NF-kappaB cascade	7	CD36 // CD36 // CD36 // CD36 // CD36 // CD36 // CD36 // CD36 // HMOX1 // PYCARD // CASP1 // TNFSF10 // HTR2B // TLR2 // TLR7 // CCL19 // GREM1 // TLR4 // CCR7 // BIRC3 // IL1B // IL1B // IL1B // IL1B // APOL3 // LGALS9 // MYD88 // MYD88 // MYD88 // MYD88 // MYD88 // UBD // ECM1 // TNFAIP3 // SECTM1 // IL10 // ECT2 // OTUD7B // F2R // S100A12	5.81026e-08
GO:0090025	biological_process	regulation of monocyte chemotaxis	9	PLA2G7 // CCL5 // CCR1 // LYN // AIF1 // GREM1 // CXCL12 // SERPINE1 // CCR2 // CCR2	5.99986e-08
GO:0060907	biological_process	positive regulation of macrophage cytokine production	9	CD36 // CD36 // CD36 // CD36 // CD36 // CD36 // CD36 // CD36 // TLR2 // TLR4	5.99986e-08
GO:0051336	biological_process	regulation of hydrolase activity	5	APOC1 // S100A8 // S100A9 // CCL5 // GPR65 // CSTA // GNA13 // STMN3 // STMN3 // CTSH // RGS1 // SERPINA1 // PYCARD // CCL2 // CASP1 // RASGRP3 // RASGRP3 // RASGRP3 // RASGRP3 // RASGRP3 // RASGRP3 // TNFSF10 // GNA15 // OAS1 // IL8 // IFI27 // C5AR1 // PLEK // CSTB // CCL19 // GZMA // PTPLAD1 // XIAP // ARAP2 // CR1 // DNAJC3 // ADAP2 // ADAP2 // ADAP2 // ADAP2 // SYTL2 // NR1H3 // TBC1D2 // DO…	6.04094e-08
GO:0033003	biological_process	regulation of mast cell activation	6	HMOX1 // HMOX1 // SYK // FCER1G // LYN // LYN // FCER1A // FGR // FGR // PTPRE // PTPRE // PTPRE // PLSCR1 // STXBP2	6.15356e-08
GO:0050715	biological_process	positive regulation of cytokine secretion	9	CD14 // CD14 // CD14 // CD14 // PYCARD // SYK // CASP1 // CLEC5A // HTR2B // TLR2 // CCL19 // CSF1R // FGR // FGR // CRTAM // MIF // P2RX7 // P2RX7 // IL10 // CADM1 // F2R	6.36389e-08
GO:0010875	biological_process	positive regulation of cholesterol efflux	9	APOE // ABCA1 // ABCG1 // NR1H3 // NR1H3 // NR1H3 // NR1H3 // NR1H3 // NR1H3 // NR1H3 // NR1H3	6.77315e-08
GO:0001818	biological_process	negative regulation of cytokine production	5	ACP5 // ACP5 // ACP5 // HMOX1 // HMOX1 // PYCARD // HLA-DRB1 // HLA-DRB1 // HLA-DRB1 // HLA-DRB1 // HLA-DRB1 // VSIG4 // TLR2 // TLR4 // ARRB2 // ARRB2 // CD83 // CSK // CSK // CSK // CSK // SLC11A1 // NCKAP1L // ISG15 // IRAK3 // THBS1 // TNFAIP3 // TNFAIP3 // TNFAIP3 // TNFAIP3 // JAK3 // IL10 // TGFB1 // DDX58	7.34438e-08
GO:0055095	biological_process	lipoprotein particle mediated signaling	7	CD36 // CD36 // CD36 // CD36 // CD36 // CD36 // CD36 // CD36	7.68471e-08
GO:0055096	biological_process	low-density lipoprotein particle mediated signaling	8	CD36 // CD36 // CD36 // CD36 // CD36 // CD36 // CD36 // CD36	7.68471e-08
GO:0071447	biological_process	cellular response to hydroperoxide	6	CD36 // CD36 // CD36 // CD36 // CD36 // CD36 // CD36 // CD36	7.68471e-08
GO:0090182	biological_process	regulation of secretion of lysosomal enzymes	8	NR1H3 // NR1H3 // NR1H3 // NR1H3 // NR1H3 // NR1H3 // NR1H3 // NR1H3	7.68471e-08
GO:0043123	biological_process	positive regulation of I-kappaB kinase/NF-kappaB cascade	8	CD36 // CD36 // CD36 // CD36 // CD36 // CD36 // CD36 // CD36 // HMOX1 // CASP1 // TNFSF10 // HTR2B // CCL19 // TLR4 // CCR7 // BIRC3 // IL1B // IL1B // IL1B // IL1B // APOL3 // LGALS9 // MYD88 // MYD88 // MYD88 // MYD88 // MYD88 // UBD // ECM1 // SECTM1 // ECT2 // F2R // S100A12	7.91356e-08
GO:0045926	biological_process	negative regulation of growth	4	SPP1 // CD36 // CD36 // CD36 // CD36 // CD36 // CD36 // CD36 // CD36 // PTPRJ // LGMN // LGMN // LGMN // LGMN // FBP1 // IRF8 // IRF8 // IRF8 // IRF8 // IRF8 // IRF8 // TLR2 // GREM1 // STK4 // CYP27B1 // ADRB2 // PPARG // PPARG // PPARG // PPARG // NTN1 // MYD88 // MYD88 // CDKN2A // EAF2 // EAF2 // IL10 // TGFB1 // PPT1 // SIPA1 // CDA // HIF1A // HIF1A	8.4751e-08
GO:0001932	biological_process	regulation of protein phosphorylation	8	CHI3L1 // CD36 // CD36 // CD36 // CD36 // CD36 // CD36 // CD36 // CD36 // CCL5 // APOE // GMFG // SAMSN1 // SAMSN1 // CXCR4 // PTPRC // PTPRC // PYCARD // ITGB2 // CCL2 // PTPN6 // PTPN6 // PTPN6 // PTPRJ // HCLS1 // SYK // LYN // LYN // IL8 // HTR2B // MLLT1 // C5AR1 // DAB2 // DAB2 // DAB2 // DAB2 // CCL19 // GREM1 // FABP4 // CCNK // CCNK // CCNK // CCNK // OSM // MAP3K1 // PAK1 // PTPLAD1 // …	8.54248e-08
GO:0002673	biological_process	regulation of acute inflammatory response	7	FCER1G // ALOX5AP // OSM // FCER1A // CR1 // CCR7 // CCR7 // CCR7 // C2 // IL1B // IL1B // IL1B // IL1B // CFH // PPARG // PPARG // PPARG // PPARG // CD55 // CFP	8.74893e-08
GO:0042953	biological_process	lipoprotein transport	6	CD36 // CD36 // CD36 // CD36 // CD36 // CD36 // CD36 // CD36 // MSR1 // MSR1 // APOC2 // PPARG	1.01662e-07
GO:0045124	biological_process	regulation of bone resorption	6	SPP1 // SYK // CA2 // CSF1R // TNFRSF11B // CSK // CSK // CSK // CSK // TFRC // TFRC // TFRC // P2RX7 // P2RX7 // TNFAIP3	1.13311e-07
GO:0051099	biological_process	positive regulation of binding	4	CLIC2 // S100A10 // ANXA2 // ANXA2 // ANXA2 // ANXA2 // ANXA2 // ANXA2 // ANXA2 // ANXA2 // ANXA2 // ANXA2 // ANXA2 // ANXA2 // ANXA2 // ANXA2 // ANXA2 // ANXA2 // ANXA2 // PLSCR1 // IGF1 // EPB41 // TGFB1 // MFNG // MFNG // MFNG	1.19656e-07
GO:0002263	biological_process	cell activation involved in immune response	4	TYROBP // LCP1 // PYCARD // DOCK2 // DOCK2 // SYK // FCER1G // LYN // LYN // TLR7 // PPBP // CX3CR1 // CX3CR1 // CX3CR1 // PLCG2 // PLCG2 // MYO1F // GPR183 // SLC11A1 // ITGAL // LAT2 // BATF // LGALS8 // LGALS8 // LGALS8 // LGALS8 // LGALS8 // ICAM1 // XRCC4 // STXBP2	1.26563e-07
GO:0002366	biological_process	leukocyte activation involved in immune response	5	TYROBP // LCP1 // PYCARD // DOCK2 // DOCK2 // SYK // FCER1G // LYN // LYN // TLR7 // PPBP // CX3CR1 // CX3CR1 // CX3CR1 // PLCG2 // PLCG2 // MYO1F // GPR183 // SLC11A1 // ITGAL // LAT2 // BATF // LGALS8 // LGALS8 // LGALS8 // LGALS8 // LGALS8 // ICAM1 // XRCC4 // STXBP2	1.26563e-07
GO:0008037	biological_process	cell recognition	3	CD36 // CD36 // CD36 // CD36 // CD36 // CD36 // CD36 // CD36 // DOCK2 // DOCK2 // CCL19 // COLEC12 // SCARB1 // PECAM1 // CCR7 // CCR7 // CCR7 // NTM // CRTAM // VCAN // CADM1 // CADM1 // CADM1 // PCDH12	1.39049e-07
GO:0002706	biological_process	regulation of lymphocyte mediated immunity	6	PTPRC // PTPRC // PTPN6 // PTPN6 // PTPN6 // FCER1G // IL7R // IL7R // IL7R // FCER1A // CR1 // ARRB2 // SASH3 // CD28 // IL1B // CRTAM // IL12RB1 // P2RX7 // P2RX7 // IL10 // TGFB1 // CADM1 // CADM1 // CADM1 // BTK	1.57958e-07
GO:0002275	biological_process	myeloid cell activation involved in immune response	6	TYROBP // PYCARD // DOCK2 // DOCK2 // SYK // FCER1G // LYN // LYN // TLR7 // PPBP // CX3CR1 // CX3CR1 // CX3CR1 // MYO1F // LAT2 // STXBP2	1.60583e-07
GO:0050854	biological_process	regulation of antigen receptor-mediated signaling pathway	6	PTPRC // PTPRC // PTPN6 // PTPN6 // PTPN6 // PTPRJ // LYN // LYN // CCR7 // CCR7 // CCR7 // PRKCH // LPXN // LCK // LCK // PTPN22	1.60583e-07
GO:0042325	biological_process	regulation of phosphorylation	7	CHI3L1 // CD36 // CD36 // CD36 // CD36 // CD36 // CD36 // CD36 // CD36 // CCL5 // APOE // GMFG // SAMSN1 // SAMSN1 // CXCR4 // PTPRC // PTPRC // PYCARD // ITGB2 // CCL2 // PTPN6 // PTPN6 // PTPN6 // PTPRJ // HCLS1 // SYK // LYN // LYN // IL8 // HTR2B // MLLT1 // C5AR1 // DAB2 // DAB2 // DAB2 // DAB2 // CCL19 // GREM1 // FABP4 // CCNK // CCNK // CCNK // CCNK // OSM // MAP3K1 // PAK1 // PTPLAD1 // …	1.98219e-07
GO:0002700	biological_process	regulation of production of molecular mediator of immune response	5	CD36 // CD36 // CD36 // CD36 // CD36 // CD36 // CD36 // CD36 // HMOX1 // HMOX1 // PTPRC // PTPRC // FCER1G // CD37 // TLR2 // TLR4 // SASH3 // CD28 // IRAK3 // MIF // JAK3 // IL10 // TGFB1 // BTK	2.50098e-07
GO:0001955	biological_process	blood vessel maturation	9	LYL1 // CDH5 // CDH5 // CDH5 // CDH5 // CDH5 // MMP2 // MMP2 // MMP2	2.64853e-07
GO:0032373	biological_process	positive regulation of sterol transport	7	APOE // ABCA1 // ABCG1 // NR1H3 // NR1H3 // NR1H3 // NR1H3 // NR1H3 // NR1H3 // NR1H3 // NR1H3	2.67915e-07
GO:0032376	biological_process	positive regulation of cholesterol transport	8	APOE // ABCA1 // ABCG1 // NR1H3 // NR1H3 // NR1H3 // NR1H3 // NR1H3 // NR1H3 // NR1H3 // NR1H3	2.67915e-07
GO:0006910	biological_process	phagocytosis, recognition	7	CD36 // CD36 // CD36 // CD36 // CD36 // CD36 // CD36 // CD36 // COLEC12 // SCARB1	3.2458e-07
GO:0050864	biological_process	regulation of B cell activation	7	SAMSN1 // SAMSN1 // MNDA // PTPRC // PTPRC // PTPN6 // PTPN6 // PTPN6 // SYK // LYN // LYN // TLR4 // SASH3 // GPR183 // CD28 // NCKAP1L // CDKN2A // MIF // TNFAIP3 // TNFAIP3 // TNFAIP3 // TNFAIP3 // IL10 // TGFB1 // BTK	3.283e-07
GO:0090188	biological_process	negative regulation of pancreatic juice secretion	7	NR1H3 // NR1H3 // NR1H3 // NR1H3 // NR1H3 // NR1H3 // NR1H3 // NR1H3	3.43623e-07
GO:0051246	biological_process	regulation of protein metabolic process	5	CHI3L1 // CD36 // CD36 // CD36 // CD36 // CD36 // CD36 // CD36 // CD36 // HMOX1 // CCL5 // APOE // GMFG // SAMSN1 // SAMSN1 // CXCR4 // PTPRC // PTPRC // ANPEP // SERPINA1 // PYCARD // ITGB2 // CCL2 // TIMP2 // TIMP2 // PTPN6 // PTPN6 // PTPN6 // PTPRJ // HCLS1 // SYK // CTSZ // LYN // LYN // CD86 // TLR1 // TLR1 // TLR1 // TLR1 // TLR1 // IL8 // HTR2B // TLR2 // TLR7 // MLLT1 // C5AR1 // DAB2 //…	3.7993e-07
GO:0048585	biological_process	negative regulation of response to stimulus	4	SPP1 // ACP5 // ACP5 // ACP5 // HMOX1 // CCL5 // APOE // APOE // APOE // SAMSN1 // SAMSN1 // STMN3 // STMN3 // PTPRC // PTPRC // RGS1 // PYCARD // HLA-DRB1 // CCL2 // TIMP2 // TIMP2 // PTPN6 // PTPN6 // PTPN6 // PTPRJ // FBP1 // SCYL2 // LYN // LYN // AIF1 // IL8 // HTR2B // PLEK // DAB2 // GREM1 // CHST11 // CHST11 // IL7R // IL7R // IL7R // CR1 // NR1H3 // NR1H3 // NR1H3 // NR1H3 // NR1H3 // NR…	4.52788e-07
GO:0045616	biological_process	regulation of keratinocyte differentiation	7	PRKCH // PRKCH // PRKCH // PRKCH // PRKCH // PRKCH // PRKCH // PRKCH // PRKCH // PRKCH // PRKCH // PRKCH // CYP27B1	4.56543e-07
GO:0071900	biological_process	regulation of protein serine/threonine kinase activity	10	CHI3L1 // APOE // CXCR4 // PTPRC // PTPRC // PYCARD // PTPN6 // PTPN6 // PTPN6 // PTPRJ // SYK // LYN // LYN // HTR2B // C5AR1 // DAB2 // DAB2 // DAB2 // DAB2 // CCL19 // CCNK // CCNK // CCNK // CCNK // PAK1 // PTPLAD1 // CSF1R // CSF1R // FCER1A // TLR4 // IL1RN // STK4 // FPR1 // MAP3K2 // IL1B // IL1B // IL1B // IL1B // FLT1 // CSK // CSK // CSK // CSK // CCNB2 // CCNB2 // IRAK3 // THBS1 // EZ…	4.56707e-07
GO:0050766	biological_process	positive regulation of phagocytosis	8	CD36 // CD36 // CD36 // CD36 // CD36 // CD36 // CD36 // CD36 // PYCARD // DOCK2 // DOCK2 // CCL2 // FCER1G // SLC11A1 // NCKAP1L // PTX3 // CAMK1D	4.75492e-07
GO:0051338	biological_process	regulation of transferase activity	5	CHI3L1 // APOE // GMFG // CXCR4 // PTPRC // PTPRC // PYCARD // CCL2 // PTPN6 // PTPN6 // PTPN6 // PTPRJ // SYK // LYN // LYN // IL8 // HTR2B // MLLT1 // C5AR1 // DAB2 // DAB2 // DAB2 // DAB2 // CCL19 // GREM1 // FABP4 // CCNK // CCNK // CCNK // CCNK // MAP3K1 // PAK1 // PTPLAD1 // CSF1R // CSF1R // FCER1A // DNAJC3 // FGR // FGR // TLR4 // IL1RN // STK4 // CCR7 // FPR1 // MAP3K2 // IL1B // IL1B /…	4.76578e-07
GO:0042119	biological_process	neutrophil activation	6	TYROBP // CCL5 // CXCR4 // SYK // FCER1G // IL8 // IL8 // CXCR2 // PPBP // MYO1F // STXBP2	4.97625e-07
GO:0015850	biological_process	organic hydroxy compound transport	5	APOC1 // CD36 // CD36 // CD36 // CD36 // CD36 // CD36 // CD36 // CD36 // APOE // APOE // APOE // ABCA1 // ABCG1 // NPC2 // SOAT1 // AQP9 // SCARB1 // MSR1 // MSR1 // NPC1 // NPC1 // NPC1 // APOC2	5.22922e-07
GO:0045582	biological_process	positive regulation of T cell differentiation	9	PTPRC // PTPRC // LILRB2 // SYK // HLA-DMA // HLA-DMA // VNN1 // CD86 // CCL19 // IL7R // IL7R // IL7R // SASH3 // CD83 // IKZF1 // NCKAP1L // CD80 // PNP // IL12RB1 // LCK // LCK	6.2551e-07
GO:0006869	biological_process	lipid transport	5	APOC1 // CD36 // CD36 // CD36 // CD36 // CD36 // CD36 // CD36 // CD36 // APOE // APOE // APOE // APOE // ABCA1 // ABCG1 // PLTP // PLIN2 // PLIN2 // NPC2 // SOAT1 // SCARB1 // OSBPL3 // MSR1 // MSR1 // NPC1 // NPC1 // NPC1 // APOC2 // APOC2 // APOC2 // SLCO2A1 // ACE // PPARG // PPARG // PPARG // PPARG // PSAP // P2RX7 // P2RX7	6.97973e-07
GO:0006801	biological_process	superoxide metabolic process	4	NCF2 // NCF2 // NCF2 // CYBA // SOD2 // SOD2 // SOD2 // SOD2 // SOD2 // SOD2 // SOD2 // SOD2 // SOD2 // FPR1 // FPR1 // FPR1 // CYBB	8.31968e-07
GO:0032102	biological_process	negative regulation of response to external stimulus	5	SPP1 // ACP5 // ACP5 // ACP5 // APOE // APOE // APOE // HLA-DRB1 // CCL2 // AIF1 // GREM1 // NR1H3 // NR1H3 // NR1H3 // NR1H3 // NR1H3 // NR1H3 // NR1H3 // NR1H3 // TNFRSF1B // AOAH // NPC1 // PPARG // PPARG // PPARG // PPARG // SERPINE1 // TNFAIP3 // TNFAIP3 // TNFAIP3 // TNFAIP3 // IL10	8.57901e-07
GO:0042116	biological_process	macrophage activation	6	TYROBP // SYK // TLR1 // AIF1 // TLR7 // CX3CR1 // CX3CR1 // CX3CR1 // TLR4 // SLC7A2 // SLC11A1 // CD93	8.57901e-07
GO:0030198	biological_process	extracellular matrix organization	4	MMP12 // MMP9 // MMP1 // MMP7 // IBSP // CTSB // TIMP2 // CTSD // GREM1 // CTSL1 // CTSK // TNFRSF11B // COL1A1 // PDGFRA // PDGFRA // PDGFRA // PDGFRA // ANXA2 // ANXA2 // ANXA2 // ANXA2 // ANXA2 // ANXA2 // ANXA2 // ANXA2 // ANXA2 // ANXA2 // ANXA2 // ANXA2 // ANXA2 // ANXA2 // ANXA2 // ANXA2 // ANXA2 // TIMP1 // COL11A1 // MMP2 // TGFBR1 // TGFBR1 // TGFBR1 // TGFB1 // PLOD1 // MMP8 // OLFML2B…	8.63418e-07
GO:0016045	biological_process	detection of bacterium	5	HLA-DRB1 // HLA-DRB1 // HLA-DRB1 // HLA-DRB1 // HLA-DRB1 // TLR1 // TLR1 // TLR1 // HLA-B // TLR2 // CD1D	8.81085e-07
GO:0043062	biological_process	extracellular structure organization	3	MMP12 // MMP9 // MMP1 // MMP7 // IBSP // CTSB // TIMP2 // CTSD // GREM1 // CTSL1 // CTSK // TNFRSF11B // COL1A1 // PDGFRA // PDGFRA // PDGFRA // PDGFRA // ANXA2 // ANXA2 // ANXA2 // ANXA2 // ANXA2 // ANXA2 // ANXA2 // ANXA2 // ANXA2 // ANXA2 // ANXA2 // ANXA2 // ANXA2 // ANXA2 // ANXA2 // ANXA2 // ANXA2 // TIMP1 // COL11A1 // MMP2 // TGFBR1 // TGFBR1 // TGFBR1 // TGFB1 // PLOD1 // MMP8 // OLFML2B…	9.40079e-07
GO:0050777	biological_process	negative regulation of immune response	5	SAMSN1 // SAMSN1 // PTPRC // PTPRC // HLA-DRB1 // PTPN6 // PTPN6 // PTPN6 // LYN // IL7R // IL7R // IL7R // CR1 // ARRB2 // IRAK3 // IFI16 // TNFAIP3 // IL10 // TGFB1 // CD55 // CCR2	9.43472e-07
GO:0043405	biological_process	regulation of MAP kinase activity	11	APOE // CXCR4 // PTPRC // PTPRC // PTPN6 // PTPN6 // PTPN6 // PTPRJ // SYK // LYN // LYN // HTR2B // C5AR1 // DAB2 // DAB2 // DAB2 // DAB2 // CCL19 // PAK1 // PTPLAD1 // FCER1A // TLR4 // IL1RN // FPR1 // MAP3K2 // IL1B // IL1B // IL1B // IL1B // FLT1 // CSK // CSK // CSK // CSK // IRAK3 // THBS1 // EZH2 // MIF // P2RX7 // P2RX7 // MAPKAPK3 // TGFB1 // FZD8 // CDK1 // DUSP4 // DUSP6 // S100A12	9.86259e-07
GO:0042035	biological_process	regulation of cytokine biosynthetic process	6	HMOX1 // SYK // CD86 // TLR1 // TLR1 // TLR1 // TLR1 // TLR1 // TLR2 // TLR7 // FCER1A // TLR4 // CD28 // CD28 // IL1B // IL1B // IL1B // IL1B // CD80 // THBS1 // CD4 // MYD88 // MYD88 // TLR8 // IL10 // CCR2	1.06751e-06
GO:0032371	biological_process	regulation of sterol transport	6	APOC1 // APOE // ABCA1 // ABCG1 // NR1H3 // NR1H3 // NR1H3 // NR1H3 // NR1H3 // NR1H3 // NR1H3 // NR1H3 // APOC2 // PPARG	1.06832e-06
GO:0032374	biological_process	regulation of cholesterol transport	7	APOC1 // APOE // ABCA1 // ABCG1 // NR1H3 // NR1H3 // NR1H3 // NR1H3 // NR1H3 // NR1H3 // NR1H3 // NR1H3 // APOC2 // PPARG	1.06832e-06
GO:0031663	biological_process	lipopolysaccharide-mediated signaling pathway	8	CCL5 // HCK // LY96 // CCL2 // LYN // LYN // TLR2 // IL18 // TLR4 // SCARB1 // IL1B // MYD88 // MYD88 // TGFB1	1.06832e-06
GO:0090026	biological_process	positive regulation of monocyte chemotaxis	10	PLA2G7 // CCL5 // CCR1 // AIF1 // CXCL12 // SERPINE1 // CCR2 // CCR2	1.12675e-06
GO:0090186	biological_process	regulation of pancreatic juice secretion	6	NR1H3 // NR1H3 // NR1H3 // NR1H3 // NR1H3 // NR1H3 // NR1H3 // NR1H3	1.12675e-06
GO:0060368	biological_process	regulation of Fc receptor mediated stimulatory signaling pathway	6	LYN // LYN // CSK // CSK // CSK // CSK // PLSCR1	1.13596e-06
GO:0070424	biological_process	regulation of nucleotide-binding oligomerization domain containing signaling pathway	6	XIAP // TLR4 // BIRC3 // TNFAIP3 // TNFAIP3 // TNFAIP3 // TNFAIP3	1.13596e-06
GO:0050730	biological_process	regulation of peptidyl-tyrosine phosphorylation	9	CD36 // CD36 // CD36 // CD36 // CD36 // CD36 // CD36 // CD36 // CCL5 // SAMSN1 // SAMSN1 // PTPRC // PTPRC // ITGB2 // PTPN6 // PTPN6 // PTPN6 // HCLS1 // SYK // LYN // LYN // GREM1 // OSM // CSF1R // CSF1R // FCER1A // ARRB2 // ARRB2 // CD80 // CD4 // CD4 // IGF1 // MIF // LCK // LCK	1.25417e-06
GO:0032695	biological_process	negative regulation of interleukin-12 production	6	ACP5 // ACP5 // ACP5 // TLR2 // ARRB2 // ARRB2 // IRAK3 // THBS1 // JAK3 // IL10	1.29353e-06
GO:0019725	biological_process	cellular homeostasis	4	S100A8 // CD52 // S100A9 // HMOX1 // CCL5 // APOE // APOE // APOE // CP // CP // CP // CP // CP // C3AR1 // CXCR4 // PTPRC // PTPRC // VCAM1 // CCR5 // CCL2 // CCR1 // CCL8 // HAMP // GNA15 // GLRX // EPB41L3 // HTR2B // C5AR1 // CCL19 // CYBA // CXCR2 // CXCR2 // CXCR2 // CXCR2 // CXCR2 // ATP6V1F // MYO5A // TBXAS1 // TBXAS1 // TBXAS1 // TBXAS1 // CX3CR1 // CX3CR1 // CX3CR1 // PLCG2 // PLCG2 //…	1.42844e-06
GO:0009620	biological_process	response to fungus	4	S100A8 // S100A9 // SYK // HAMP // COTL1 // COTL1 // TLR2 // TLR4 // PTX3 // MYD88 // MYD88 // TGFB1 // S100A12	1.55029e-06
GO:0042113	biological_process	B cell activation	6	PTPRC // PTPRC // VCAM1 // CD86 // CD86 // IL7R // IL7R // IL7R // PLCG2 // PLCG2 // GPR183 // BLNK // IKZF1 // ITGA4 // HHEX // HHEX // LYL1 // LYL1 // LAT2 // BATF // LGALS8 // LGALS8 // LGALS8 // LGALS8 // LGALS8 // JAK3 // IL10 // XRCC4 // BTK	1.55029e-06
GO:0043029	biological_process	T cell homeostasis	7	CORO1A // CORO1A // CORO1A // CORO1A // BCL2L11 // BCL2L11 // BCL2L11 // CCNB2 // NCKAP1L // P2RX7 // P2RX7 // JAK3 // TGFB1	1.55029e-06
GO:0001776	biological_process	leukocyte homeostasis	5	LYN // LYN // CORO1A // CORO1A // CORO1A // CORO1A // BCL2L11 // BCL2L11 // BCL2L11 // CCNB2 // NCKAP1L // P2RX7 // P2RX7 // TNFAIP3 // TNFAIP3 // TNFAIP3 // TNFAIP3 // JAK3 // TGFB1 // HIF1A // HIF1A	1.69513e-06
GO:0034103	biological_process	regulation of tissue remodeling	4	SPP1 // SYK // CA2 // GREM1 // IL18 // CSF1R // TNFRSF11B // CSK // CSK // CSK // CSK // TFRC // TFRC // TFRC // P2RX7 // P2RX7 // TNFAIP3	1.80507e-06
GO:0045859	biological_process	regulation of protein kinase activity	9	CHI3L1 // APOE // GMFG // CXCR4 // PTPRC // PTPRC // PYCARD // CCL2 // PTPN6 // PTPN6 // PTPN6 // PTPRJ // SYK // LYN // LYN // IL8 // HTR2B // MLLT1 // C5AR1 // DAB2 // DAB2 // DAB2 // DAB2 // CCL19 // FABP4 // CCNK // CCNK // CCNK // CCNK // MAP3K1 // PAK1 // PTPLAD1 // CSF1R // CSF1R // FCER1A // DNAJC3 // FGR // FGR // TLR4 // IL1RN // STK4 // CCR7 // FPR1 // MAP3K2 // IL1B // IL1B // IL1B //…	1.87626e-06
GO:0045621	biological_process	positive regulation of lymphocyte differentiation	8	PTPRC // PTPRC // LILRB2 // SYK // HLA-DMA // HLA-DMA // VNN1 // CD86 // CCL19 // IL7R // IL7R // IL7R // SASH3 // CD83 // IKZF1 // NCKAP1L // CD80 // PNP // IL12RB1 // LCK // LCK // BTK	1.88172e-06
GO:0010884	biological_process	positive regulation of lipid storage	5	CD36 // CD36 // CD36 // CD36 // CD36 // CD36 // CD36 // CD36 // LPL // SCARB1 // MSR1 // MSR1	2.07725e-06
GO:0030194	biological_process	positive regulation of blood coagulation	7	CD36 // CD36 // CD36 // CD36 // CD36 // CD36 // CD36 // CD36 // THBS1 // SERPINE1 // HPSE // F2R	2.07725e-06
GO:1900048	biological_process	positive regulation of hemostasis	5	CD36 // CD36 // CD36 // CD36 // CD36 // CD36 // CD36 // CD36 // THBS1 // SERPINE1 // HPSE // F2R	2.07725e-06
GO:0002576	biological_process	platelet degranulation	8	CD36 // SERPINA1 // SYK // FCER1G // F13A1 // LYN // LYN // SRGN // PLEK // PPBP // CFD // PECAM1 // THBS1 // TIMP1 // SERPINE1 // IGF1 // PSAP // TGFB1 // VEGFC // PF4	2.15407e-06
GO:0010874	biological_process	regulation of cholesterol efflux	8	APOE // ABCA1 // ABCG1 // NR1H3 // NR1H3 // NR1H3 // NR1H3 // NR1H3 // NR1H3 // NR1H3 // NR1H3	2.47149e-06
GO:0010888	biological_process	negative regulation of lipid storage	5	ABCA1 // ABCG1 // NR1H3 // NR1H3 // NR1H3 // NR1H3 // NR1H3 // NR1H3 // NR1H3 // NR1H3 // PPARG	2.47149e-06
GO:0002443	biological_process	leukocyte mediated immunity	3	IGKC // C1QB // HLA-DQB1 // CTSH // CTSH // HLA-DRB1 // HLA-DRB1 // HLA-DRB1 // HLA-DRB1 // HLA-DRB1 // HLA-DRB1 // C1QA // PTPN6 // PTPN6 // PTPN6 // HLA-DMA // HLA-DMA // FCER1G // LYN // LYN // IGKV4-1 // SLAMF7 // CTSC // PPBP // CR1 // MYO1F // C2 // BTN3A2 // CRTAM // CD8A // BTN3A3 // SLC11A1 // LAT2 // BATF // C1R // MYD88 // MYD88 // ICAM1 // TLR8 // CADM1 // CD55 // XRCC4 // STXBP2	2.53327e-06
GO:0032729	biological_process	positive regulation of interferon-gamma production	6	PYCARD // IRF8 // IRF8 // IRF8 // IRF8 // IRF8 // IRF8 // IL18 // TLR4 // SASH3 // IL1B // SLC11A1 // IL12RB1 // CCR2	2.9342e-06
GO:0045604	biological_process	regulation of epidermal cell differentiation	6	PRKCH // PRKCH // PRKCH // PRKCH // PRKCH // PRKCH // PRKCH // PRKCH // PRKCH // PRKCH // PRKCH // PRKCH // CYP27B1 // EZH2	2.9342e-06
GO:0050663	biological_process	cytokine secretion	8	CHI3L1 // LCP2 // ABCA1 // LYN // LYN // CCL19 // CCR7 // CCR7 // CCR7 // BTN3A2 // PNP // S100A12	3.16636e-06
GO:0032691	biological_process	negative regulation of interleukin-1 beta production	7	ACP5 // ACP5 // ACP5 // ARRB2 // ARRB2 // TNFAIP3 // TNFAIP3 // TNFAIP3 // TNFAIP3	3.19088e-06
GO:0042535	biological_process	positive regulation of tumor necrosis factor biosynthetic process	8	TLR1 // TLR1 // TLR1 // TLR1 // TLR1 // TLR2 // TLR4 // THBS1 // CCR2	3.19088e-06
GO:0045410	biological_process	positive regulation of interleukin-6 biosynthetic process	8	TLR1 // TLR1 // TLR1 // TLR1 // TLR1 // IL1B // IL1B // IL1B // IL1B	3.19088e-06
GO:0002250	biological_process	adaptive immune response	3	IGKC // C1QB // CTSS // HLA-DQB1 // CTSH // CTSH // HLA-DRB1 // HLA-DRB1 // HLA-DRB1 // HLA-DRB1 // HLA-DRB1 // HLA-DRB1 // C1QA // SYK // HLA-DMA // HLA-DMA // FCER1G // TLR1 // TLR1 // IGKV4-1 // CTSC // IL18 // CR1 // TLR4 // CTSL1 // ITK // C2 // BTN3A2 // CRTAM // CD8A // BTN3A3 // SLC11A1 // BATF // C1R // MYD88 // MYD88 // ICAM1 // TLR8 // TGFB1 // CADM1 // CD55 // XRCC4 // BTK	3.28335e-06
GO:0007265	biological_process	Ras protein signal transduction	7	GNA13 // GNA13 // RASGRP3 // RASGRP3 // RASGRP3 // RASGRP3 // RASGRP3 // RASGRP3 // AIF1 // RASGRP1 // RALA // PTPLAD1 // PTPLAD1 // PTPLAD1 // ARHGEF3 // ARHGDIB // MAPK13 // GRB2 // DOK2 // DOK2 // DOK2 // RAP2A // SDCBP // IGF1 // CDKN2A // MRAS // MAPKAPK3 // ELMO1 // CDK1	3.36324e-06
GO:0032844	biological_process	regulation of homeostatic process	3	SPP1 // PTPRC // PTPRC // HLA-DRB1 // HLA-DRB1 // HLA-DRB1 // HLA-DRB1 // HLA-DRB1 // CCR5 // SYK // FCER1G // LYN // LYN // HTR2B // CCL19 // CA2 // CSF1R // PLCG2 // PLCG2 // NR1H3 // MAFB // CLIC2 // CCR7 // SPI1 // LMO2 // TNFRSF11B // IL1B // IL1B // IL1B // IL1B // CSK // CSK // CSK // CSK // P2RX4 // NCKAP1L // TFRC // TFRC // TFRC // MIF // P2RX7 // P2RX7 // TNFAIP3 // LCK // LCK // TGFB1…	3.4129e-06
GO:0043277	biological_process	apoptotic cell clearance	7	CD36 // CD36 // CD36 // CD36 // CD36 // CD36 // CD36 // CD36 // NR1H3 // SCARB1 // THBS1	3.96089e-06
GO:0090022	biological_process	regulation of neutrophil chemotaxis	9	C3AR1 // C3AR1 // IL8 // CCL19 // CCR7 // CCR7 // CCR7 // NCKAP1L // MPP1 // MPP1 // CAMK1D	3.96089e-06
GO:0042554	biological_process	superoxide anion generation	5	NCF2 // NCF2 // NCF2 // CYBA // SOD2 // SOD2 // SOD2 // FPR1 // FPR1 // FPR1 // CYBB	3.96089e-06
GO:0001910	biological_process	regulation of leukocyte mediated cytotoxicity	5	PTPRC // PTPRC // IL7R // IL7R // IL7R // ARRB2 // CRTAM // IL12RB1 // P2RX7 // P2RX7 // ICAM1 // CADM1 // CADM1 // CADM1	3.99816e-06
GO:0051222	biological_process	positive regulation of protein transport	7	CD14 // CD14 // CD14 // CD14 // PYCARD // HCLS1 // SYK // CASP1 // CLEC5A // HTR2B // TLR2 // TLR7 // DAB2 // CCL19 // GREM1 // CSF1R // FGR // FGR // TLR4 // IL1B // CRTAM // IGF1 // TGFBR1 // MIF // P2RX7 // P2RX7 // IL10 // TGFB1 // ECT2 // ECT2 // ECT2 // CADM1 // VEGFC // DDX58 // CDK1 // F2R	4.14123e-06
GO:0032970	biological_process	regulation of actin filament-based process	4	GPR65 // HCK // CAPG // PYCARD // HCLS1 // PLEK // MAP3K1 // PAK1 // PAK1 // PAK1 // PAK1 // PAK1 // PAK1 // PAK1 // CSF1R // CSF1R // CORO1A // CORO1A // CORO1A // CORO1A // MYO1F // S1PR1 // CCR7 // DSC2 // ARPC1B // ARPC1B // ARPC1B // ARPC1B // ARPC1B // ARPC1B // ARPC1B // ARPC1B // ARPC1B // GRB2 // GRB2 // ABL2 // NCKAP1L // PDGFRA // TMSB10 // CXCL12 // DSP // ATP1A1 // ATP1A1	4.64395e-06
GO:0016192	biological_process	vesicle-mediated transport	4	IGKC // CD36 // CD36 // CD36 // CD36 // CD36 // CD36 // CD36 // CD36 // VAMP8 // VAMP8 // VAMP8 // CCL5 // APOE // CD14 // HCK // HCK // SERPINA1 // PYCARD // DOCK2 // DOCK2 // ABCA1 // CCR1 // SYK // FCER1G // SCYL2 // CCL8 // IRF8 // IRF8 // IRF8 // IRF8 // IRF8 // IRF8 // F13A1 // ARL4C // LYN // LYN // SRGN // IGKV4-1 // AIF1 // IL8 // HTR2B // PLEK // FCN1 // DAB2 // DAB2 // DAB2 // DAB2 // …	4.70177e-06
GO:0010563	biological_process	negative regulation of phosphorus metabolic process	6	APOC1 // APOE // GMFG // SAMSN1 // SAMSN1 // PTPRC // PTPRC // PYCARD // CCR5 // PTPN6 // PTPN6 // PTPN6 // PTPRJ // LYN // LYN // MLLT1 // PLEK // CXCR2 // CXCR2 // CXCR2 // CXCR2 // CXCR2 // GREM1 // FABP4 // DNAJC3 // BIRC3 // IL1B // IL1B // IL1B // IL1B // DDIT4 // IRAK3 // PPIF // CDKN2A // CDKN2A // TNFAIP3 // TNFAIP3 // TNFAIP3 // TNFAIP3 // TGFB1 // DUSP4 // IGFBP3 // DUSP6 // DUSP6 // C…	5.42061e-06
GO:0045936	biological_process	negative regulation of phosphate metabolic process	7	APOC1 // APOE // GMFG // SAMSN1 // SAMSN1 // PTPRC // PTPRC // PYCARD // CCR5 // PTPN6 // PTPN6 // PTPN6 // PTPRJ // LYN // LYN // MLLT1 // PLEK // CXCR2 // CXCR2 // CXCR2 // CXCR2 // CXCR2 // GREM1 // FABP4 // DNAJC3 // BIRC3 // IL1B // IL1B // IL1B // IL1B // DDIT4 // IRAK3 // PPIF // CDKN2A // CDKN2A // TNFAIP3 // TNFAIP3 // TNFAIP3 // TNFAIP3 // TGFB1 // DUSP4 // IGFBP3 // DUSP6 // DUSP6 // C…	5.42061e-06
GO:0050678	biological_process	regulation of epithelial cell proliferation	5	MMP12 // APOE // CCL2 // HTR2B // C5AR1 // CYBA // GRN // GRN // GRN // GRN // GRN // GRN // GRN // GRN // GRN // LAMB1 // SCG2 // NRP2 // THBS1 // RUNX3 // IGF1 // ECM1 // TGFBR1 // TGFBR1 // TGFBR1 // EAF2 // EAF2 // TNFAIP3 // TNFAIP3 // TNFAIP3 // TNFAIP3 // TGFB1 // VEGFC // SERPINF1 // SERPINF1 // SERPINF1 // SERPINF1 // SERPINF1 // SERPINF1 // HIF1A	6.28851e-06
GO:0032943	biological_process	mononuclear cell proliferation	4	CXCR4 // PTPRC // PTPRC // ITGAM // DOCK2 // DOCK2 // IL7R // IL7R // IL7R // PSMB10 // CRTAM // SLC11A1 // ITGAL // ITGAL // ITGAL // CXCL12 // ACE // P2RX7 // P2RX7 // IL10 // TGFB1 // CADM1	6.28851e-06
GO:0043549	biological_process	regulation of kinase activity	8	CHI3L1 // APOE // GMFG // CXCR4 // PTPRC // PTPRC // PYCARD // CCL2 // PTPN6 // PTPN6 // PTPN6 // PTPRJ // SYK // LYN // LYN // IL8 // HTR2B // MLLT1 // C5AR1 // DAB2 // DAB2 // DAB2 // DAB2 // CCL19 // FABP4 // CCNK // CCNK // CCNK // CCNK // MAP3K1 // PAK1 // PTPLAD1 // CSF1R // CSF1R // FCER1A // DNAJC3 // FGR // FGR // TLR4 // IL1RN // STK4 // CCR7 // FPR1 // MAP3K2 // IL1B // IL1B // IL1B //…	6.46385e-06
GO:0006968	biological_process	cellular defense response	4	TYROBP // MNDA // LY96 // LILRB2 // CCR5 // NCF2 // CLEC5A // C5AR1 // CXCR2 // CX3CR1 // FAIM3 // ITK // TRAC // LSP1 // CXCL9 // CCR2	6.82406e-06
GO:0034383	biological_process	low-density lipoprotein particle clearance	5	CD36 // CD36 // CD36 // CD36 // CD36 // CD36 // CD36 // CD36 // HMOX1 // SCARB1	7.04954e-06
GO:0043304	biological_process	regulation of mast cell degranulation	8	HMOX1 // HMOX1 // SYK // FCER1G // LYN // LYN // FCER1A // FGR // FGR // STXBP2	7.04954e-06
GO:0032956	biological_process	regulation of actin cytoskeleton organization	7	GPR65 // HCK // CAPG // PYCARD // HCLS1 // PLEK // MAP3K1 // PAK1 // PAK1 // PAK1 // PAK1 // PAK1 // PAK1 // PAK1 // CSF1R // CSF1R // CORO1A // CORO1A // CORO1A // CORO1A // MYO1F // S1PR1 // CCR7 // ARPC1B // ARPC1B // ARPC1B // ARPC1B // ARPC1B // ARPC1B // ARPC1B // ARPC1B // ARPC1B // GRB2 // GRB2 // ABL2 // NCKAP1L // PDGFRA // TMSB10 // CXCL12	7.04954e-06
GO:0042534	biological_process	regulation of tumor necrosis factor biosynthetic process	7	TLR1 // TLR1 // TLR1 // TLR1 // TLR1 // TLR2 // TLR4 // THBS1 // IL10 // CCR2	7.04954e-06
GO:0043031	biological_process	negative regulation of macrophage activation	7	NR1H3 // NR1H3 // NR1H3 // NR1H3 // NR1H3 // NR1H3 // NR1H3 // NR1H3	7.12771e-06
GO:0042632	biological_process	cholesterol homeostasis	7	APOE // APOE // APOE // ABCA1 // ABCG1 // FABP4 // NPC2 // SOAT1 // NR1H3 // NR1H3 // NR1H3 // NR1H3 // NR1H3 // NR1H3 // NR1H3 // NR1H3 // SCARB1 // NPC1 // APOC2	7.26642e-06
GO:0045834	biological_process	positive regulation of lipid metabolic process	6	APOC1 // APOE // APOE // APOE // ABCG1 // LYN // LYN // HTR2B // CCL19 // FGR // NR1H3 // SCARB1 // CCR7 // APOC2 // IL1B // IL1B // IL1B // IL1B // FLT1 // PDGFRA // PPARG // PPARG // PPARG // PPARG // TGFB1	7.48215e-06
GO:0030217	biological_process	T cell differentiation	10	PTPRC // PTPRC // DOCK2 // DOCK2 // SYK // HLA-DMA // HLA-DMA // CD3D // IL7R // IL7R // IL7R // CCR7 // CCR7 // CCR7 // ITK // ITK // CD28 // IKZF1 // CD1D // CD8A // BATF // CD4 // BCL11B // LCK // TGFB1 // XRCC4 // PTPN22 // PTPN22 // FZD8	7.89798e-06
GO:0010562	biological_process	positive regulation of phosphorus metabolic process	6	CHI3L1 // CD36 // CD36 // CD36 // CD36 // CD36 // CD36 // CD36 // CD36 // CCL5 // APOE // GPR65 // CXCR4 // PTPRC // PTPRC // ABCA1 // CCL2 // TIMP2 // TIMP2 // HCLS1 // SYK // LYN // LYN // IL8 // HTR2B // C5AR1 // DAB2 // DAB2 // DAB2 // DAB2 // CCL19 // GREM1 // OSM // MAP3K1 // PAK1 // PTPLAD1 // CSF1R // CSF1R // FCER1A // DNAJC3 // TLR4 // IL1RN // ARRB2 // ARRB2 // STK4 // CCR7 // FPR1 // …	8.06885e-06
GO:0045937	biological_process	positive regulation of phosphate metabolic process	7	CHI3L1 // CD36 // CD36 // CD36 // CD36 // CD36 // CD36 // CD36 // CD36 // CCL5 // APOE // GPR65 // CXCR4 // PTPRC // PTPRC // ABCA1 // CCL2 // TIMP2 // TIMP2 // HCLS1 // SYK // LYN // LYN // IL8 // HTR2B // C5AR1 // DAB2 // DAB2 // DAB2 // DAB2 // CCL19 // GREM1 // OSM // MAP3K1 // PAK1 // PTPLAD1 // CSF1R // CSF1R // FCER1A // DNAJC3 // TLR4 // IL1RN // ARRB2 // ARRB2 // STK4 // CCR7 // FPR1 // …	8.06885e-06
GO:0055092	biological_process	sterol homeostasis	6	APOE // APOE // APOE // ABCA1 // ABCG1 // FABP4 // NPC2 // SOAT1 // NR1H3 // NR1H3 // NR1H3 // NR1H3 // NR1H3 // NR1H3 // NR1H3 // NR1H3 // SCARB1 // NPC1 // APOC2	8.81961e-06
GO:0045765	biological_process	regulation of angiogenesis	6	CHI3L1 // HMOX1 // HMOX1 // C3AR1 // C3AR1 // CTSH // CTSH // CCL2 // GREM1 // CX3CR1 // CX3CR1 // CX3CR1 // STAB1 // IL1B // IL1B // IL1B // IL1B // THBS2 // THBS2 // CXCL10 // FLT1 // ADM // ADM // HHEX // HHEX // THBS1 // THBS1 // SERPINE1 // ECM1 // TNFAIP3 // SERPINF1 // PF4 // CCR2 // HIF1A	9.00467e-06
GO:0048731	biological_process	system development	4	SPP1 // CHI3L1 // MMP9 // C1QB // C1QB // C1QB // C1QB // ACP5 // ACP5 // ACP5 // HMOX1 // HMOX1 // TYROBP // APOE // APOE // APOE // CSTA // GNA13 // GNA13 // STMN3 // STMN3 // CXCR4 // KRT14 // TMEM176B // CTSH // CTSH // PTPRC // PTPRC // ANPEP // SNX10 // LCP1 // LCP1 // LCP1 // ITGAM // VCAM1 // DOCK2 // DOCK2 // IBSP // ITGAX // CCL2 // TIMP2 // TIMP2 // BID // PTPRJ // HCLS1 // LIPA // LIP…	9.26538e-06
GO:0045061	biological_process	thymic T cell selection	12	PTPRC // PTPRC // DOCK2 // DOCK2 // HLA-DMA // HLA-DMA // CD3D // CCR7 // CCR7 // CCR7 // CD28	9.41874e-06
GO:0031341	biological_process	regulation of cell killing	3	PTPRC // PTPRC // IL7R // IL7R // IL7R // ARRB2 // CRTAM // IL12RB1 // P2RX7 // P2RX7 // ICAM1 // CADM1 // CADM1 // CADM1	9.65637e-06
GO:0019538	biological_process	protein metabolic process	4	MMP12 // APOC1 // APOC1 // APOC1 // APOC1 // APOC1 // APOC1 // MMP9 // IGKC // PLA2G7 // C1QB // CTSS // ADAMDEC1 // CCL5 // APOE // APOE // APOE // APOE // GMFG // CSTA // CPVL // CPVL // CPVL // CPVL // CPVL // CPVL // HCK // LPL // CXCR4 // CTSH // CTSH // PTPRC // PTPRC // MMP1 // CPM // CPM // CPM // CPM // ANPEP // ANPEP // ANPEP // ANPEP // ANPEP // PYCARD // PYCARD // MMP7 // CTSB // CTSB…	9.69142e-06
GO:0044058	biological_process	regulation of digestive system process	5	SGK1 // NR1H3 // NR1H3 // NR1H3 // NR1H3 // NR1H3 // NR1H3 // NR1H3 // NR1H3 // OXTR // OXTR // OXTR	9.78217e-06
GO:0032692	biological_process	negative regulation of interleukin-1 production	6	ACP5 // ACP5 // ACP5 // ARRB2 // ARRB2 // TNFAIP3 // TNFAIP3 // TNFAIP3 // TNFAIP3	1.12087e-05
GO:0002698	biological_process	negative regulation of immune effector process	5	HMOX1 // HMOX1 // PTPRC // PTPRC // PTPN6 // PTPN6 // PTPN6 // IL7R // IL7R // IL7R // CR1 // ARRB2 // IRAK3 // MICB // JAK3 // TGFB1 // CD55 // CCR2	1.12087e-05
GO:2000241	biological_process	regulation of reproductive process	3	CCL5 // OAS1 // IL8 // IL18 // OSM // OSM // APOBEC3G // PLAT // PLAT // PLAT // OAS3 // MX1 // CCL4 // CD28 // TPST2 // TPST2 // TPST2 // TPST2 // TPST2 // TPST2 // ISG15 // PLSCR1 // APOBEC3C // IFI16 // TIMP1 // IFITM1 // EAF2 // EAF2 // OXTR // OXTR // OXTR // SERPINF1 // SERPINF1 // SERPINF1 // SERPINF1 // SERPINF1 // SERPINF1 // NUPR1	1.12087e-05
GO:0001835	biological_process	blastocyst hatching	9	GRN // GRN // GRN // GRN // GRN // GRN // GRN // GRN // GRN	1.12087e-05
GO:0035188	biological_process	hatching	4	GRN // GRN // GRN // GRN // GRN // GRN // GRN // GRN // GRN	1.12087e-05
GO:0071684	biological_process	organism emergence from protective structure	3	GRN // GRN // GRN // GRN // GRN // GRN // GRN // GRN // GRN	1.12087e-05
GO:0051047	biological_process	positive regulation of secretion	6	CD14 // CD14 // CD14 // CD14 // PYCARD // HLA-DRB1 // HLA-DRB1 // HLA-DRB1 // HLA-DRB1 // HLA-DRB1 // SYK // FCER1G // CASP1 // CLEC5A // HTR2B // TLR2 // CCL19 // CSF1R // FCER1A // FGR // FGR // IL1B // IL1B // IL1B // IL1B // CRTAM // P2RX4 // MIF // P2RX7 // P2RX7 // OXTR // OXTR // OXTR // IL10 // TGFB1 // CADM1 // VEGFC // F2R // HIF1A // HIF1A	1.1253e-05
GO:0033006	biological_process	regulation of mast cell activation involved in immune response	7	HMOX1 // HMOX1 // SYK // FCER1G // LYN // LYN // FCER1A // FGR // FGR // STXBP2	1.13484e-05
GO:0045619	biological_process	regulation of lymphocyte differentiation	7	PTPRC // PTPRC // LILRB2 // PTPN6 // PTPN6 // PTPN6 // SYK // HLA-DMA // HLA-DMA // VNN1 // CD86 // CCL19 // IL7R // IL7R // IL7R // CD2 // SASH3 // CD83 // IKZF1 // NCKAP1L // CD80 // PNP // IL12RB1 // CDKN2A // JAK3 // LCK // LCK // BTK	1.13785e-05
GO:0070661	biological_process	leukocyte proliferation	3	CXCR4 // PTPRC // PTPRC // ITGAM // DOCK2 // DOCK2 // IL7R // IL7R // IL7R // PSMB10 // CRTAM // SLC11A1 // ITGAL // ITGAL // ITGAL // CXCL12 // ACE // P2RX7 // P2RX7 // IL10 // TGFB1 // CADM1	1.15814e-05
GO:0044767	biological_process	single-organism developmental process	2	SPP1 // MMP12 // CHI3L1 // MMP9 // C1QB // C1QB // C1QB // C1QB // ACP5 // ACP5 // ACP5 // HMOX1 // HMOX1 // TYROBP // APOE // APOE // APOE // GNA13 // GNA13 // STMN3 // STMN3 // CXCR4 // TMEM176B // CTSH // CTSH // PTPRC // PTPRC // ANPEP // SNX10 // LCP1 // LCP1 // LCP1 // ITGAM // VCAM1 // DOCK2 // DOCK2 // ITGAX // NCF2 // NCF2 // NCF2 // CCL2 // TIMP2 // TIMP2 // BID // PTPRJ // HCLS1 // LIP…	1.17129e-05
GO:0051250	biological_process	negative regulation of lymphocyte activation	7	SAMSN1 // SAMSN1 // MNDA // LILRB2 // HLA-DRB1 // HLA-DRB1 // HLA-DRB1 // HLA-DRB1 // HLA-DRB1 // VSIG4 // PTPN6 // PTPN6 // PTPN6 // LYN // LYN // LST1 // CDKN2A // TNFAIP3 // TNFAIP3 // TNFAIP3 // TNFAIP3 // JAK3 // IL10 // TGFB1 // PTPN22 // PTPN22	1.30723e-05
GO:0051247	biological_process	positive regulation of protein metabolic process	6	CHI3L1 // CD36 // CD36 // CD36 // CD36 // CD36 // CD36 // CD36 // CD36 // HMOX1 // CCL5 // APOE // CXCR4 // PTPRC // PTPRC // CCL2 // HCLS1 // SYK // LYN // LYN // CD86 // TLR1 // TLR1 // TLR1 // TLR1 // TLR1 // IL8 // HTR2B // TLR2 // TLR7 // C5AR1 // DAB2 // DAB2 // DAB2 // DAB2 // CCL19 // GREM1 // OSM // MAP3K1 // PAK1 // PTPLAD1 // CSF1R // CSF1R // FCER1A // DNAJC3 // SOAT1 // NR1H3 // TLR4…	1.30804e-05
GO:1901342	biological_process	regulation of vasculature development	5	CHI3L1 // HMOX1 // HMOX1 // C3AR1 // C3AR1 // CTSH // CTSH // CCL2 // GREM1 // CX3CR1 // CX3CR1 // CX3CR1 // STAB1 // IL1B // IL1B // IL1B // IL1B // THBS2 // THBS2 // CXCL10 // FLT1 // ADM // ADM // HHEX // HHEX // THBS1 // THBS1 // SERPINE1 // ECM1 // TNFAIP3 // VEGFC // SERPINF1 // PF4 // CCR2 // HIF1A	1.30949e-05
GO:0050855	biological_process	regulation of B cell receptor signaling pathway	7	PTPRC // PTPRC // LYN // LYN // PRKCH // LPXN // PTPN22	1.31518e-05
GO:0002675	biological_process	positive regulation of acute inflammatory response	8	FCER1G // ALOX5AP // OSM // FCER1A // CCR7 // CCR7 // CCR7 // IL1B // IL1B // IL1B // IL1B	1.38815e-05
GO:0032308	biological_process	positive regulation of prostaglandin secretion	10	IL1B // IL1B // IL1B // IL1B // P2RX4 // MIF // P2RX7 // P2RX7	1.49118e-05
GO:0006140	biological_process	regulation of nucleotide metabolic process	7	APOE // GPR65 // STMN3 // STMN3 // RGS1 // CCR5 // ABCA1 // TIMP2 // TIMP2 // RASGRP3 // RASGRP3 // RASGRP3 // RASGRP3 // RASGRP3 // RASGRP3 // CCL19 // CXCR2 // CXCR2 // CXCR2 // CXCR2 // CXCR2 // PTPLAD1 // ARAP2 // ADAP2 // ADAP2 // ADAP2 // ADAP2 // TBC1D2 // DOCK4 // ARRB2 // ARRB2 // S1PR1 // CCR7 // DNAJC1 // RGS10 // ADM // NCKAP1L // ADRB2 // ARHGAP15 // PPIF // PLSCR1 // GMIP // GIT2 //…	1.49524e-05
GO:0050714	biological_process	positive regulation of protein secretion	8	CD14 // CD14 // CD14 // CD14 // PYCARD // SYK // CASP1 // CLEC5A // HTR2B // TLR2 // CCL19 // CSF1R // FGR // FGR // CRTAM // MIF // P2RX7 // P2RX7 // IL10 // TGFB1 // CADM1 // VEGFC // F2R	1.49524e-05
GO:0070482	biological_process	response to oxygen levels	3	HMOX1 // HMOX1 // CXCR4 // VCAM1 // NCF2 // NCF2 // NCF2 // CCL2 // CASP1 // UCP2 // UCP2 // ATP1B1 // ATP1B1 // IL18 // PAK1 // PAK1 // PAK1 // PAK1 // PAK1 // PAK1 // PAK1 // SOD2 // SOD2 // SOD2 // DPP4 // PLAT // PLAT // PLAT // PDPN // PDPN // IREB2 // IREB2 // PLAU // DDIT4 // ADM // ADM // THBS1 // MMP2 // MMP2 // MMP2 // ICAM1 // OXTR // OXTR // OXTR // TGFB1 // PLOD1 // HIF1A	1.49694e-05
GO:2000377	biological_process	regulation of reactive oxygen species metabolic process	5	ACP5 // ACP5 // ACP5 // CD36 // CD36 // CD36 // CD36 // CD36 // CD36 // CD36 // CD36 // SYK // RAC2 // IL18 // AKR1C3 // GRB2 // BIRC3 // THBS1 // TGFB1	1.49966e-05
GO:0009628	biological_process	response to abiotic stimulus	2	CHI3L1 // HMOX1 // HMOX1 // APOE // CD14 // CD14 // CD14 // CD14 // GPR65 // LPL // CXCR4 // PTPRC // PTPRC // VCAM1 // NCF2 // NCF2 // NCF2 // CCL2 // TFEC // CASP1 // LYN // LYN // UCP2 // UCP2 // HTR2B // TLR7 // ATP1B1 // ATP1B1 // CYBA // CA2 // IL18 // OSM // OSM // MAP3K1 // PAK1 // PAK1 // PAK1 // PAK1 // PAK1 // PAK1 // PAK1 // KMO // AKR1C3 // SOD2 // SOD2 // SOD2 // TLR4 // CCL7 // AQP…	1.54547e-05
GO:0001934	biological_process	positive regulation of protein phosphorylation	9	CHI3L1 // CD36 // CD36 // CD36 // CD36 // CD36 // CD36 // CD36 // CD36 // CCL5 // CXCR4 // PTPRC // PTPRC // CCL2 // HCLS1 // SYK // LYN // LYN // IL8 // HTR2B // C5AR1 // DAB2 // DAB2 // DAB2 // DAB2 // CCL19 // GREM1 // OSM // MAP3K1 // PAK1 // PTPLAD1 // CSF1R // CSF1R // FCER1A // DNAJC3 // TLR4 // IL1RN // ARRB2 // ARRB2 // STK4 // CCR7 // FPR1 // MAP3K2 // IL1B // IGFBP1 // FLT1 // CSK // C…	1.55114e-05
GO:0042327	biological_process	positive regulation of phosphorylation	8	CHI3L1 // CD36 // CD36 // CD36 // CD36 // CD36 // CD36 // CD36 // CD36 // CCL5 // CXCR4 // PTPRC // PTPRC // CCL2 // HCLS1 // SYK // LYN // LYN // IL8 // HTR2B // C5AR1 // DAB2 // DAB2 // DAB2 // DAB2 // CCL19 // GREM1 // OSM // MAP3K1 // PAK1 // PTPLAD1 // CSF1R // CSF1R // FCER1A // DNAJC3 // TLR4 // IL1RN // ARRB2 // ARRB2 // STK4 // CCR7 // FPR1 // MAP3K2 // IL1B // IGFBP1 // FLT1 // CSK // C…	1.563e-05
GO:0044351	biological_process	macropinocytosis	7	PYCARD // DOCK2 // DOCK2 // MAPKAPK3 // MAPKAPK3 // MAPKAPK3	1.563e-05
GO:0051209	biological_process	release of sequestered calcium ion into cytosol	13	PTPRC // PTPRC // CCR5 // HTR2B // CCL19 // PLCG2 // PLCG2 // CCR7 // P2RX7 // P2RX7 // LCK // LCK // F2R	1.58455e-05
GO:0051283	biological_process	negative regulation of sequestering of calcium ion	6	PTPRC // PTPRC // CCR5 // HTR2B // CCL19 // PLCG2 // PLCG2 // CCR7 // P2RX7 // P2RX7 // LCK // LCK // F2R	1.58455e-05
GO:0002920	biological_process	regulation of humoral immune response	5	PTPRC // PTPRC // PTPN6 // PTPN6 // PTPN6 // CD37 // CR1 // CCR7 // CCR7 // CCR7 // C2 // CFH // CD55 // CFP	1.62015e-05
GO:0045682	biological_process	regulation of epidermis development	5	KRT17 // KRT17 // PRKCH // PRKCH // PRKCH // PRKCH // PRKCH // PRKCH // PRKCH // PRKCH // PRKCH // PRKCH // PRKCH // PRKCH // CYP27B1 // EZH2 // HPSE	1.68121e-05
GO:0032940	biological_process	secretion by cell	6	CHI3L1 // CD36 // CCL5 // HCK // LCP2 // SERPINA1 // ABCA1 // CCR1 // SYK // FCER1G // CCL8 // F13A1 // LYN // LYN // SRGN // PLEK // CCL19 // RALA // PPBP // PAK1 // FCER1A // MYO5A // CFD // SYTL2 // IL1RN // MYO1F // PECAM1 // CCR7 // CCR7 // CCR7 // SCG2 // BTN3A2 // CKLF // CXCL10 // ADM // ADM // LAT2 // THBS1 // PNP // TIMP1 // SERPINE1 // IGF1 // PSAP // P2RX7 // P2RX7 // RAB31 // TGFB1 /…	1.76225e-05
GO:0007589	biological_process	body fluid secretion	6	HK2 // HK2 // ANXA2 // ANXA2 // ANXA2 // ANXA2 // ANXA2 // ANXA2 // ANXA2 // ANXA2 // ANXA2 // ANXA2 // ANXA2 // ANXA2 // ANXA2 // ANXA2 // ANXA2 // ANXA2 // ANXA2 // OXTR // HIF1A // HIF1A	1.80223e-05
GO:0030183	biological_process	B cell differentiation	10	PTPRC // PTPRC // VCAM1 // PLCG2 // PLCG2 // GPR183 // BLNK // IKZF1 // ITGA4 // HHEX // HHEX // LYL1 // LYL1 // LGALS8 // LGALS8 // LGALS8 // LGALS8 // LGALS8 // JAK3 // IL10	1.85458e-05
GO:0048260	biological_process	positive regulation of receptor-mediated endocytosis	8	SCYL2 // DAB2 // DAB2 // DAB2 // DAB2 // CCL19 // GREM1 // ARRB2 // ARRB2 // SELE // SERPINE1 // PPT1	1.88278e-05
GO:0001782	biological_process	B cell homeostasis	7	LYN // LYN // BCL2L11 // BCL2L11 // BCL2L11 // NCKAP1L // TNFAIP3 // TNFAIP3 // TNFAIP3 // TNFAIP3 // HIF1A // HIF1A	1.88278e-05
GO:0008285	biological_process	negative regulation of cell proliferation	5	IFI30 // HMOX1 // HMOX1 // APOE // MNDA // LILRB2 // HLA-DRB1 // HLA-DRB1 // HLA-DRB1 // HLA-DRB1 // HLA-DRB1 // TIMP2 // TIMP2 // VSIG4 // PTPN6 // PTPN6 // PTPN6 // PTPRJ // LYN // LYN // AIF1 // IL8 // GREM1 // OSM // PAK1 // GPNMB // LST1 // SOD2 // SOD2 // SOD2 // STK4 // CEBPA // SCG2 // IL1B // CSK // CSK // CSK // CSK // ADM // ADM // CYP27B1 // CXCL1 // CD33 // CDH5 // CDH5 // CDH5 // CD…	1.91468e-05
GO:0090023	biological_process	positive regulation of neutrophil chemotaxis	10	C3AR1 // C3AR1 // IL8 // CCL19 // CCR7 // CCR7 // CCR7 // NCKAP1L // CAMK1D	1.91491e-05
GO:0005975	biological_process	carbohydrate metabolic process	3	CHI3L1 // CHI3L1 // NPL // CHIT1 // CHIT1 // CHIT1 // FBP1 // FBP1 // HS3ST2 // MGAT4A // GALNT6 // CHST11 // CHST11 // CHST11 // CHST11 // CHST2 // MAN2B1 // MAN2B1 // MAN2B1 // MAN2B1 // HK2 // HK2 // FUCA1 // MGAT4B // MGAT4B // MGAT4B // MGAT4B // MGAT4B // MGAT4B // MGAT4B // MGAT4B // MGAT4B // MGAT4B // AOAH // SRD5A3 // HS3ST3A1 // GUSB // GUSB // GUSB // GUSB // PGD // PGD // PGD // PGD …	1.98372e-05
GO:0033344	biological_process	cholesterol efflux	8	APOC1 // APOE // APOE // APOE // ABCA1 // ABCG1 // NPC2 // SOAT1 // SCARB1 // NPC1 // APOC2	1.99252e-05
GO:0050850	biological_process	positive regulation of calcium-mediated signaling	7	SYK // FCER1A // CCL4 // CD8A // ITGAL // ITGAL // ITGAL // P2RX4 // CD4 // CD4 // IGF1	1.99252e-05
GO:0045580	biological_process	regulation of T cell differentiation	8	PTPRC // PTPRC // LILRB2 // SYK // HLA-DMA // HLA-DMA // VNN1 // CD86 // CCL19 // IL7R // IL7R // IL7R // CD2 // SASH3 // CD83 // IKZF1 // NCKAP1L // CD80 // PNP // IL12RB1 // CDKN2A // JAK3 // LCK // LCK	2.05226e-05
GO:0051130	biological_process	positive regulation of cellular component organization	5	CD36 // CD36 // CD36 // CD36 // CD36 // CD36 // CD36 // CD36 // APOE // APOE // APOE // CD14 // CD14 // CD14 // CD14 // GPR65 // HCK // PYCARD // DOCK2 // DOCK2 // CCL2 // BID // PTPRJ // HCLS1 // FCER1G // SCYL2 // LYN // TNFSF10 // PLEK // DAB2 // DAB2 // DAB2 // DAB2 // CCL19 // RALA // GREM1 // MAP3K1 // PAK1 // GZMB // PAN3 // ARRB2 // ARRB2 // CCR7 // GRB2 // GRB2 // SELE // CD28 // CD28 //…	2.0729e-05
GO:0072593	biological_process	reactive oxygen species metabolic process	3	HBB // NCF2 // NCF2 // NCF2 // CYBA // SOD2 // SOD2 // SOD2 // SOD2 // SOD2 // SOD2 // SOD2 // SOD2 // SOD2 // FPR1 // FPR1 // FPR1 // DDIT4 // CYBB // CYBB // P2RX7 // P2RX7	2.0729e-05
GO:0007040	biological_process	lysosome organization	5	ABCA1 // HEXB // HEXB // HEXB // ACP2 // ACP2 // PPT1 // PPT1 // PPT1 // GAA // GAA // GAA // TPP1 // TPP1	2.08435e-05
GO:1901071	biological_process	glucosamine-containing compound metabolic process	5	CHI3L1 // CHIT1 // CHIT1 // CHIT1 // CHST2 // GNPDA1 // GNPDA1 // GNPDA1 // GNPDA1 // GNPDA1 // GNPDA1 // GNPDA1 // GNPDA1	2.09443e-05
GO:0002720	biological_process	positive regulation of cytokine production involved in immune response	7	CD36 // CD36 // CD36 // CD36 // CD36 // CD36 // CD36 // CD36 // FCER1G // TLR2 // TLR4 // SASH3 // MIF	2.09443e-05
GO:0051051	biological_process	negative regulation of transport	5	APOC1 // CD36 // CD36 // CD36 // CD36 // CD36 // CD36 // CD36 // CD36 // HMOX1 // HMOX1 // LILRB2 // SRGN // OSM // NR1H3 // NR1H3 // NR1H3 // NR1H3 // NR1H3 // NR1H3 // NR1H3 // NR1H3 // CLIC2 // IL1RN // APOC2 // IL1B // IL1B // IL1B // IL1B // CSK // CSK // CSK // CSK // THBS1 // PPIF // RHBDF2 // RHBDF2 // RHBDF2 // RHBDF2 // RHBDF2 // ICAM1 // OXTR // OXTR // OXTR // IL10 // TGFB1 // F2R // …	2.1882e-05
GO:0030099	biological_process	myeloid cell differentiation	8	MMP9 // SNX10 // HCLS1 // IRF8 // IRF8 // IRF8 // IRF8 // IRF8 // IRF8 // LYN // LYN // DAB2 // DAB2 // DAB2 // DAB2 // CSF1R // CSF1R // CEBPA // SPI1 // IREB2 // IREB2 // PRKX // HHEX // HHEX // NCKAP1L // PPARG // IFI16 // TFRC // TFRC // TFRC // BATF // TIMP1 // UBD // TGFB1 // CBFA2T3	2.22443e-05
GO:1901698	biological_process	response to nitrogen compound	3	HMOX1 // APOE // APOE // APOE // CCL2 // PTPN6 // KYNU // CASP1 // LYN // LYN // UCP2 // UCP2 // TLR2 // C5AR1 // CCL19 // CYBA // ATP6V1F // IL18 // PAK1 // PAK1 // PAK1 // PAK1 // PAK1 // PAK1 // PAK1 // MYO5A // IL1RN // AQP9 // CCR7 // PLAT // PLAT // PLAT // CEBPA // GRB2 // IL1B // IL1B // IL1B // IL1B // IGFBP1 // COL1A1 // SELL // CSK // CSK // CSK // CSK // ADM // ADM // HHEX // HHEX // …	2.27841e-05
GO:0050731	biological_process	positive regulation of peptidyl-tyrosine phosphorylation	10	CD36 // CD36 // CD36 // CD36 // CD36 // CD36 // CD36 // CD36 // CCL5 // HCLS1 // SYK // LYN // LYN // GREM1 // OSM // CSF1R // CSF1R // FCER1A // ARRB2 // ARRB2 // CD80 // CD4 // CD4 // IGF1 // MIF // LCK // LCK	2.30789e-05
GO:1900542	biological_process	regulation of purine nucleotide metabolic process	8	APOE // GPR65 // STMN3 // STMN3 // RGS1 // CCR5 // ABCA1 // TIMP2 // TIMP2 // RASGRP3 // RASGRP3 // RASGRP3 // RASGRP3 // RASGRP3 // RASGRP3 // CCL19 // CXCR2 // CXCR2 // CXCR2 // CXCR2 // CXCR2 // PTPLAD1 // ARAP2 // ADAP2 // ADAP2 // ADAP2 // ADAP2 // TBC1D2 // DOCK4 // ARRB2 // ARRB2 // S1PR1 // CCR7 // DNAJC1 // RGS10 // ADM // NCKAP1L // ADRB2 // ARHGAP15 // PPIF // PLSCR1 // GMIP // GIT2 //…	2.48486e-05
GO:0050709	biological_process	negative regulation of protein secretion	8	SRGN // NR1H3 // NR1H3 // NR1H3 // NR1H3 // NR1H3 // NR1H3 // NR1H3 // NR1H3 // RHBDF2 // RHBDF2 // RHBDF2 // RHBDF2 // RHBDF2 // IL10 // F2R	2.5245e-05
GO:0018212	biological_process	peptidyl-tyrosine modification	8	HCK // PTPN6 // SYK // LYN // LYN // OSM // OSM // CSF1R // CSF1R // FGR // FGR // TPST2 // TPST2 // TPST2 // TPST2 // TPST2 // FLT1 // ABL2 // PDGFRA // JAK3 // LCK // LCK // F2R // BTK	2.6614e-05
GO:0002702	biological_process	positive regulation of production of molecular mediator of immune response	6	CD36 // CD36 // CD36 // CD36 // CD36 // CD36 // CD36 // CD36 // FCER1G // CD37 // TLR2 // TLR4 // SASH3 // MIF	2.68334e-05
GO:0051282	biological_process	regulation of sequestering of calcium ion	5	PTPRC // PTPRC // CCR5 // HTR2B // CCL19 // PLCG2 // PLCG2 // CCR7 // P2RX7 // P2RX7 // LCK // LCK // F2R	2.77304e-05
GO:0034121	biological_process	regulation of toll-like receptor signaling pathway	6	LYN // LYN // TLR2 // NR1H3 // ARRB2 // ARRB2 // BIRC3 // TLR5 // IRAK3 // TNFAIP3 // TNFAIP3 // TNFAIP3 // TNFAIP3	2.77304e-05
GO:0035634	biological_process	response to stilbenoid	6	CD36 // CD36 // CD36 // CD36 // CD36 // CD36 // CD36 // CD36	2.81354e-05
GO:2000121	biological_process	regulation of removal of superoxide radicals	7	CD36 // CD36 // CD36 // CD36 // CD36 // CD36 // CD36 // CD36	2.81354e-05
GO:0002407	biological_process	dendritic cell chemotaxis	8	CCL5 // CXCR4 // CCR5 // CCR1 // CCL19 // CXCR2 // CCR7 // CCR2	2.81354e-05
GO:0002577	biological_process	regulation of antigen processing and presentation	4	LILRB2 // PYCARD // CCL19 // CCR7 // CCR7 // CCR7 // SLC11A1 // THBS1	2.81354e-05
GO:0032306	biological_process	regulation of prostaglandin secretion	9	IL1B // IL1B // IL1B // IL1B // P2RX4 // MIF // P2RX7 // P2RX7	2.81354e-05
GO:0060770	biological_process	negative regulation of epithelial cell proliferation involved in prostate gland development	7	EAF2 // EAF2 // SERPINF1 // SERPINF1 // SERPINF1 // SERPINF1 // SERPINF1 // SERPINF1	2.81354e-05
GO:0043300	biological_process	regulation of leukocyte degranulation	7	HMOX1 // HMOX1 // SYK // FCER1G // LYN // LYN // FCER1A // FGR // FGR // STXBP2 // CCR2	2.82599e-05
GO:0008015	biological_process	blood circulation	5	HMOX1 // HMOX1 // APOE // APOE // APOE // C3AR1 // HBB // ANPEP // NCF2 // NCF2 // NCF2 // PTPRJ // CTSZ // HTR2B // SGK1 // CYBA // IL18 // SOD2 // SOD2 // SOD2 // PTGS1 // GCH1 // CXCL10 // CPA3 // ADM // ADM // P2RX4 // P2RX4 // P2RX4 // ADRB2 // CXCL12 // ACE // PPARG // OLR1 // EPB41 // OXTR // OXTR // OXTR // VEGFC // F2R // ATP1A1 // ATP1A1 // GAA // MME	2.887e-05
GO:0010243	biological_process	response to organic nitrogen	4	HMOX1 // APOE // APOE // APOE // CCL2 // PTPN6 // KYNU // CASP1 // LYN // LYN // UCP2 // UCP2 // TLR2 // C5AR1 // CYBA // ATP6V1F // IL18 // PAK1 // PAK1 // PAK1 // PAK1 // PAK1 // PAK1 // PAK1 // MYO5A // IL1RN // AQP9 // PLAT // PLAT // PLAT // CEBPA // GRB2 // IL1B // IL1B // IL1B // IL1B // IGFBP1 // COL1A1 // SELL // CSK // CSK // CSK // CSK // ADM // ADM // HHEX // HHEX // P2RX4 // ATP6V1A …	2.887e-05
GO:0070664	biological_process	negative regulation of leukocyte proliferation	6	MNDA // LILRB2 // HLA-DRB1 // HLA-DRB1 // HLA-DRB1 // HLA-DRB1 // HLA-DRB1 // VSIG4 // PTPN6 // PTPN6 // PTPN6 // LYN // LYN // GREM1 // LST1 // CDKN2A // TNFAIP3 // IL10 // TGFB1	2.90484e-05
GO:0050679	biological_process	positive regulation of epithelial cell proliferation	6	MMP12 // CCL2 // HTR2B // C5AR1 // CYBA // GRN // GRN // GRN // GRN // GRN // GRN // GRN // GRN // GRN // LAMB1 // SCG2 // NRP2 // IGF1 // ECM1 // TNFAIP3 // TNFAIP3 // TNFAIP3 // TNFAIP3 // TGFB1 // VEGFC // HIF1A	2.96649e-05
GO:0045428	biological_process	regulation of nitric oxide biosynthetic process	6	ACP5 // ACP5 // ACP5 // HBB // TLR2 // SOD2 // SOD2 // SOD2 // TLR4 // IL1B // GLA // P2RX4 // PTX3 // ICAM1 // IL10	2.97347e-05
GO:0071622	biological_process	regulation of granulocyte chemotaxis	9	CCL5 // C3AR1 // C3AR1 // CCL2 // PTPRJ // THBS1 // CAMK1D	3.13321e-05
GO:0045766	biological_process	positive regulation of angiogenesis	7	CHI3L1 // HMOX1 // HMOX1 // C3AR1 // C3AR1 // CTSH // CTSH // GREM1 // CX3CR1 // CX3CR1 // CX3CR1 // IL1B // IL1B // IL1B // IL1B // FLT1 // ADM // ADM // THBS1 // SERPINE1 // ECM1 // HIF1A	3.13491e-05
GO:0046851	biological_process	negative regulation of bone remodeling	6	GREM1 // TNFRSF11B // CSK // CSK // CSK // CSK // P2RX7 // P2RX7 // TNFAIP3	3.13596e-05
GO:0002449	biological_process	lymphocyte mediated immunity	4	IGKC // C1QB // HLA-DQB1 // CTSH // CTSH // HLA-DRB1 // HLA-DRB1 // HLA-DRB1 // HLA-DRB1 // HLA-DRB1 // HLA-DRB1 // C1QA // PTPN6 // PTPN6 // PTPN6 // HLA-DMA // HLA-DMA // FCER1G // IGKV4-1 // SLAMF7 // CTSC // CR1 // C2 // BTN3A2 // CRTAM // CD8A // BTN3A3 // SLC11A1 // BATF // C1R // MYD88 // MYD88 // ICAM1 // TLR8 // CADM1 // CD55 // XRCC4	3.14909e-05
GO:0003013	biological_process	circulatory system process	4	HMOX1 // HMOX1 // APOE // APOE // APOE // C3AR1 // HBB // ANPEP // NCF2 // NCF2 // NCF2 // PTPRJ // CTSZ // HTR2B // SGK1 // CYBA // IL18 // SOD2 // SOD2 // SOD2 // PTGS1 // GCH1 // CXCL10 // CPA3 // ADM // ADM // P2RX4 // P2RX4 // P2RX4 // ADRB2 // CXCL12 // ACE // PPARG // OLR1 // EPB41 // OXTR // OXTR // OXTR // VEGFC // F2R // ATP1A1 // ATP1A1 // GAA // MME	3.59426e-05
GO:0002886	biological_process	regulation of myeloid leukocyte mediated immunity	6	HMOX1 // HMOX1 // SYK // FCER1G // LYN // LYN // FCER1A // FGR // FGR // STXBP2 // CCR2	4.00988e-05
GO:0010543	biological_process	regulation of platelet activation	7	APOE // PTPRJ // SYK // FCER1G // LYN // LYN // PLEK // TLR4 // PDPN // PDPN // PDGFRA	4.00988e-05
GO:0070428	biological_process	regulation of nucleotide-binding oligomerization domain containing 1 signaling pathway	7	TLR4 // TNFAIP3 // TNFAIP3 // TNFAIP3 // TNFAIP3	4.02392e-05
GO:0070432	biological_process	regulation of nucleotide-binding oligomerization domain containing 2 signaling pathway	7	TLR4 // TNFAIP3 // TNFAIP3 // TNFAIP3 // TNFAIP3	4.02392e-05
GO:0040008	biological_process	regulation of growth	3	SPP1 // S100A8 // S100A9 // CD36 // CD36 // CD36 // CD36 // CD36 // CD36 // CD36 // CD36 // APOE // APOE // APOE // PTPRJ // LGMN // LGMN // LGMN // LGMN // FBP1 // IRF8 // IRF8 // IRF8 // IRF8 // IRF8 // IRF8 // TLR2 // SGK1 // CYBA // GREM1 // OSM // STK4 // SASH3 // KRT17 // KRT17 // IKZF1 // BCL2L11 // BCL2L11 // BCL2L11 // IGFBP1 // IGFBP1 // IGFBP1 // CYP27B1 // ADRB2 // RPS6KA1 // ESM1 // …	4.1266e-05
GO:0071495	biological_process	cellular response to endogenous stimulus	3	CTSS // CD36 // CD36 // CD36 // CD36 // CD36 // CD36 // CD36 // CD36 // CCL5 // CTSH // CTSH // CTSB // NCF2 // NCF2 // NCF2 // CCL2 // PTPN6 // LYN // CD86 // UCP2 // UCP2 // IL8 // TLR2 // DAB2 // DAB2 // DAB2 // DAB2 // CYBA // ATP6V1F // IL18 // MAP3K1 // PAK1 // PAK1 // PAK1 // PAK1 // PAK1 // PAK1 // PAK1 // MYO5A // CX3CR1 // CX3CR1 // CX3CR1 // VAV1 // AKR1C3 // AQP9 // ARRB2 // CTSL1 // …	4.12881e-05
GO:0051048	biological_process	negative regulation of secretion	6	HMOX1 // HMOX1 // SRGN // OSM // NR1H3 // NR1H3 // NR1H3 // NR1H3 // NR1H3 // NR1H3 // NR1H3 // NR1H3 // IL1RN // IL1B // IL1B // IL1B // IL1B // RHBDF2 // RHBDF2 // RHBDF2 // RHBDF2 // RHBDF2 // OXTR // OXTR // OXTR // IL10 // F2R // CCR2	4.22668e-05
GO:0055072	biological_process	iron ion homeostasis	7	HMOX1 // CP // CP // CP // CP // CP // STEAP4 // HAMP // ATP6V1F // SOD2 // SOD2 // SOD2 // IREB2 // IREB2 // SLC11A1 // ATP6V1A // CYBRD1 // ATP6V1B2 // TFRC // TFRC // TFRC // STEAP1 // HIF1A // HIF1A	4.96873e-05
GO:0002704	biological_process	negative regulation of leukocyte mediated immunity	6	PTPRC // PTPRC // PTPN6 // PTPN6 // PTPN6 // IL7R // IL7R // IL7R // ARRB2	5.06436e-05
GO:0002707	biological_process	negative regulation of lymphocyte mediated immunity	7	PTPRC // PTPRC // PTPN6 // PTPN6 // PTPN6 // IL7R // IL7R // IL7R // ARRB2	5.06436e-05
GO:0032303	biological_process	regulation of icosanoid secretion	8	SYK // IL1B // IL1B // IL1B // IL1B // P2RX4 // MIF // P2RX7 // P2RX7	5.06436e-05
GO:0010759	biological_process	positive regulation of macrophage chemotaxis	10	CCL5 // C3AR1 // C3AR1 // CCL2 // PTPRJ // THBS1	5.29392e-05
GO:2001198	biological_process	regulation of dendritic cell differentiation	5	TMEM176B // LILRB2 // HLA-B // TMEM176A // TMEM176A // TMEM176A	5.29392e-05
GO:0001911	biological_process	negative regulation of leukocyte mediated cytotoxicity	6	PTPRC // PTPRC // IL7R // IL7R // IL7R // ARRB2	5.29392e-05
GO:0031342	biological_process	negative regulation of cell killing	4	PTPRC // PTPRC // IL7R // IL7R // IL7R // ARRB2	5.29392e-05
GO:0060467	biological_process	negative regulation of fertilization	5	TPST2 // TPST2 // TPST2 // TPST2 // TPST2 // TPST2	5.29392e-05
GO:0060468	biological_process	prevention of polyspermy	7	TPST2 // TPST2 // TPST2 // TPST2 // TPST2 // TPST2	5.29392e-05
GO:0001922	biological_process	B-1 B cell homeostasis	8	TNFAIP3 // TNFAIP3 // TNFAIP3 // TNFAIP3 // HIF1A // HIF1A	5.29392e-05
GO:0044259	biological_process	multicellular organismal macromolecule metabolic process	4	MMP12 // MMP9 // MMP1 // MMP7 // CTSB // CTSD // AKR1C3 // CTSL1 // CTSK // COL1A1 // ACE // COL11A1 // MMP2 // MMP2 // MMP2 // P2RX7 // P2RX7 // MMP8 // HIF1A // HIF1A	5.37629e-05
GO:0070328	biological_process	triglyceride homeostasis	7	LPL // NR1H3 // NR1H3 // NR1H3 // NR1H3 // NR1H3 // NR1H3 // NR1H3 // NR1H3 // SCARB1 // APOC2	5.52459e-05
GO:0002820	biological_process	negative regulation of adaptive immune response	6	SAMSN1 // SAMSN1 // PTPRC // PTPRC // PTPN6 // PTPN6 // PTPN6 // IL7R // IL7R // IL7R	5.876e-05
GO:0070372	biological_process	regulation of ERK1 and ERK2 cascade	8	CHI3L1 // PYCARD // CCR1 // PTPN6 // SYK // LYN // LYN // C5AR1 // CCL19 // CSF1R // CSF1R // TLR4 // ARRB2 // ARRB2 // CCR7 // GPR183 // CSK // CSK // CSK // CSK // PDGFRA // IGF1 // MIF // DUSP6 // DUSP6 // F2R	5.87921e-05
GO:0050820	biological_process	positive regulation of coagulation	5	CD36 // CD36 // CD36 // CD36 // CD36 // CD36 // CD36 // CD36 // THBS1 // SERPINE1 // HPSE // F2R	6.16961e-05
GO:0051347	biological_process	positive regulation of transferase activity	6	CHI3L1 // CXCR4 // PTPRC // PTPRC // CCL2 // SYK // LYN // LYN // IL8 // HTR2B // C5AR1 // DAB2 // DAB2 // DAB2 // DAB2 // CCL19 // GREM1 // MAP3K1 // PAK1 // PTPLAD1 // CSF1R // CSF1R // FCER1A // DNAJC3 // FGR // TLR4 // IL1RN // STK4 // CCR7 // FPR1 // MAP3K2 // IL1B // IGFBP1 // FLT1 // CSK // CSK // CSK // CSK // SLC11A1 // NCKAP1L // ADRB2 // PDGFRA // THBS1 // KDELR3 // CD4 // EZH2 // TGFB…	6.54428e-05
GO:0032490	biological_process	detection of molecule of bacterial origin	6	LY96 // TLR1 // TLR1 // TLR1 // TLR2 // TLR4 // SCARB1	6.77222e-05
GO:0048259	biological_process	regulation of receptor-mediated endocytosis	7	APOC1 // SCYL2 // DAB2 // DAB2 // DAB2 // DAB2 // CCL19 // GREM1 // ARRB2 // ARRB2 // SELE // APOC2 // SERPINE1 // PPT1	6.81273e-05
GO:0051348	biological_process	negative regulation of transferase activity	6	APOE // GMFG // PTPRC // PYCARD // PTPN6 // PTPN6 // PTPN6 // PTPRJ // LYN // LYN // MLLT1 // FABP4 // DNAJC3 // IL1B // IL1B // IL1B // IL1B // CSK // CSK // CSK // CSK // IRAK3 // PPARG // PPARG // PPARG // PPARG // CDKN2A // CDKN2A // TNFAIP3 // TNFAIP3 // TNFAIP3 // TNFAIP3 // DUSP4 // DUSP6	7.13138e-05
GO:0046651	biological_process	lymphocyte proliferation	6	CXCR4 // PTPRC // PTPRC // ITGAM // DOCK2 // DOCK2 // IL7R // IL7R // IL7R // PSMB10 // CRTAM // SLC11A1 // ITGAL // ITGAL // ITGAL // CXCL12 // P2RX7 // P2RX7 // IL10 // CADM1	7.26109e-05
GO:0007275	biological_process	multicellular organismal development	3	SPP1 // CHI3L1 // MMP9 // C1QB // C1QB // C1QB // C1QB // ACP5 // ACP5 // ACP5 // HMOX1 // HMOX1 // TYROBP // APOE // APOE // APOE // GPR65 // CSTA // GNA13 // GNA13 // STMN3 // STMN3 // CXCR4 // KRT14 // TMEM176B // CTSH // CTSH // PTPRC // PTPRC // ANPEP // SNX10 // LCP1 // LCP1 // LCP1 // ITGB2 // ITGB2 // ITGB2 // ITGB2 // ITGB2 // ITGB2 // ITGB2 // ITGB2 // ITGB2 // ITGB2 // ITGAM // VCAM1 /…	7.4863e-05
GO:0055090	biological_process	acylglycerol homeostasis	6	LPL // NR1H3 // NR1H3 // NR1H3 // NR1H3 // NR1H3 // NR1H3 // NR1H3 // NR1H3 // SCARB1 // APOC2	7.6144e-05
GO:0043030	biological_process	regulation of macrophage activation	6	NR1H3 // NR1H3 // NR1H3 // NR1H3 // NR1H3 // NR1H3 // NR1H3 // NR1H3 // SLC7A2 // THBS1 // MIF	7.6144e-05
GO:0034104	biological_process	negative regulation of tissue remodeling	5	GREM1 // TNFRSF11B // CSK // CSK // CSK // CSK // P2RX7 // P2RX7 // TNFAIP3	7.86249e-05
GO:0006825	biological_process	copper ion transport	9	CP // CP // CP // CP // CP // SLC31A2 // SLC31A1 // SCO2 // ATOX1 // ATOX1	8.49038e-05
GO:0002456	biological_process	T cell mediated immunity	5	CTSH // CTSH // CTSC // BTN3A2 // CRTAM // CD8A // BTN3A3 // SLC11A1 // ICAM1 // CADM1	8.49038e-05
GO:0036336	biological_process	dendritic cell migration	7	CCL5 // CXCR4 // CCR5 // CCR1 // CCL19 // CXCR2 // CCR7 // CCR2	8.81531e-05
GO:0043368	biological_process	positive T cell selection	12	PTPRC // PTPRC // DOCK2 // DOCK2 // HLA-DMA // HLA-DMA // CD3D // BCL11B	8.81531e-05
GO:0002313	biological_process	mature B cell differentiation involved in immune response	12	PLCG2 // PLCG2 // GPR183 // LGALS8 // LGALS8 // LGALS8 // LGALS8 // LGALS8	8.81531e-05
GO:0036293	biological_process	response to decreased oxygen levels	4	HMOX1 // HMOX1 // CXCR4 // VCAM1 // CCL2 // CASP1 // UCP2 // UCP2 // ATP1B1 // ATP1B1 // IL18 // PAK1 // PAK1 // PAK1 // PAK1 // PAK1 // PAK1 // PAK1 // SOD2 // SOD2 // SOD2 // DPP4 // PLAT // PLAT // PLAT // IREB2 // IREB2 // PLAU // DDIT4 // ADM // ADM // THBS1 // MMP2 // MMP2 // MMP2 // ICAM1 // OXTR // OXTR // OXTR // TGFB1 // PLOD1 // HIF1A	9.24564e-05
GO:0009987	biological_process	cellular process	1	SPP1 // SPP1 // MMP12 // CCL18 // APOC1 // APOC1 // APOC1 // S100A8 // CHI3L1 // MMP9 // CD52 // IFI30 // S100A9 // IGKC // BCL2A1 // PLA2G7 // ACP5 // ACP5 // ACP5 // ACP5 // CTSS // NPL // CD36 // CD36 // CD36 // CD36 // CD36 // CD36 // CD36 // CD36 // CD36 // CD36 // CD36 // CD36 // CD36 // VAMP8 // VAMP8 // LYZ // LYZ // HMOX1 // HMOX1 // TYROBP // CCL5 // APOE // APOE // APOE // HLA-DRA // C…	9.45277e-05
GO:0051098	biological_process	regulation of binding	3	HMOX1 // HMOX1 // DAB2 // GZMA // CLIC2 // ARRB2 // S100A10 // ADRB2 // ANXA2 // ANXA2 // ANXA2 // ANXA2 // ANXA2 // ANXA2 // ANXA2 // ANXA2 // ANXA2 // ANXA2 // ANXA2 // ANXA2 // ANXA2 // ANXA2 // ANXA2 // ANXA2 // ANXA2 // PLSCR1 // IFI16 // IGF1 // EPB41 // TGFBR1 // TGFBR1 // TGFBR1 // TGFB1 // MFNG // MFNG // MFNG	9.59475e-05
GO:0048872	biological_process	homeostasis of number of cells	4	HMOX1 // HCLS1 // LIPA // LIPA // LIPA // LYN // LYN // IL7R // IL7R // IL7R // CORO1A // CORO1A // CORO1A // CORO1A // SASH3 // SPI1 // IREB2 // IREB2 // BCL2L11 // BCL2L11 // BCL2L11 // CCNB2 // NCKAP1L // TIMP1 // P2RX7 // P2RX7 // TNFAIP3 // TNFAIP3 // TNFAIP3 // TNFAIP3 // JAK3 // TGFB1 // F2R // HIF1A // HIF1A	0.000102414
GO:0044243	biological_process	multicellular organismal catabolic process	4	MMP12 // MMP9 // MMP1 // MMP7 // CTSB // CTSD // CTSL1 // CTSK // COL1A1 // ACE // COL11A1 // MMP2 // MMP2 // MMP2 // P2RX7 // P2RX7 // MMP8	0.000104086
GO:0002460	biological_process	adaptive immune response based on somatic recombination of immune receptors built from immunoglobulin superfamily domains	4	IGKC // C1QB // HLA-DQB1 // CTSH // CTSH // HLA-DRB1 // HLA-DRB1 // HLA-DRB1 // HLA-DRB1 // HLA-DRB1 // HLA-DRB1 // C1QA // HLA-DMA // HLA-DMA // FCER1G // TLR1 // TLR1 // IGKV4-1 // CTSC // IL18 // CR1 // TLR4 // C2 // BTN3A2 // CRTAM // CD8A // BTN3A3 // SLC11A1 // BATF // C1R // MYD88 // MYD88 // ICAM1 // TLR8 // TGFB1 // CADM1 // CD55 // XRCC4	0.000105034
GO:0032720	biological_process	negative regulation of tumor necrosis factor production	6	ACP5 // ACP5 // ACP5 // TLR4 // ARRB2 // ARRB2 // IRAK3 // TNFAIP3 // TNFAIP3 // TNFAIP3 // TNFAIP3 // IL10	0.000106527
GO:0008217	biological_process	regulation of blood pressure	6	HMOX1 // HMOX1 // HBB // ANPEP // NCF2 // NCF2 // NCF2 // CTSZ // SGK1 // CYBA // SOD2 // SOD2 // SOD2 // PTGS1 // GCH1 // CPA3 // P2RX4 // ADRB2 // ACE // PPARG // OXTR // OXTR // OXTR // VEGFC // F2R // ATP1A1 // ATP1A1 // MME	0.000106527
GO:0043406	biological_process	positive regulation of MAP kinase activity	12	CXCR4 // PTPRC // PTPRC // SYK // HTR2B // C5AR1 // DAB2 // DAB2 // DAB2 // DAB2 // CCL19 // PAK1 // PTPLAD1 // FCER1A // TLR4 // IL1RN // FPR1 // MAP3K2 // IL1B // FLT1 // CSK // CSK // CSK // CSK // THBS1 // EZH2 // MIF // P2RX7 // P2RX7 // MAPKAPK3 // TGFB1 // FZD8 // CDK1 // S100A12	0.000108097
GO:0030155	biological_process	regulation of cell adhesion	4	SPP1 // CD36 // ADAMDEC1 // CCL5 // PTPRC // PTPRJ // SYK // LYN // LYN // IL8 // CYTIP // DAB2 // DAB2 // DAB2 // DAB2 // GREM1 // IL18 // FXYD5 // ARHGDIB // IL1RN // MYO1F // S1PR1 // DPP4 // CCR7 // LAMB1 // LAMB1 // PLAU // IL1B // COL1A1 // ABL2 // PODXL // PRKX // ITGAL // ITGAL // ITGAL // NCKAP1L // THBS1 // THBS1 // CBLL1 // CBLL1 // SERPINE1 // LPXN // CDKN2A // ICAM1 // TGFB1 // SIPA1…	0.000114732
GO:0043086	biological_process	negative regulation of catalytic activity	5	APOC1 // APOE // GMFG // CSTA // PTPRC // SERPINA1 // PYCARD // PTPN6 // PTPN6 // PTPN6 // PTPRJ // LYN // LYN // MLLT1 // CSTB // GZMA // FABP4 // XIAP // CR1 // DNAJC3 // SYTL2 // ARRB2 // ARRB2 // GCHFR // GCHFR // PSMB8 // PSMB10 // IL1B // IL1B // IL1B // IL1B // GLA // CSK // CSK // CSK // CSK // CYP27B1 // PSMB9 // NCKAP1L // IRAK3 // THBS1 // RPS6KA1 // PPIF // GMIP // PPARG // PPARG // P…	0.000116356
GO:0006810	biological_process	transport	3	APOC1 // CHI3L1 // IGKC // CD36 // CD36 // CD36 // CD36 // CD36 // CD36 // CD36 // CD36 // VAMP8 // VAMP8 // VAMP8 // HMOX1 // LAPTM5 // CCL5 // APOE // APOE // APOE // APOE // CP // CP // CP // CP // CP // CD14 // HBB // HCK // HCK // LCP2 // PTPRC // PTPRC // SNX10 // SERPINA1 // PYCARD // MMP7 // SLC14A1 // DOCK2 // DOCK2 // CCR5 // ABCA1 // STEAP4 // CCR1 // BID // SYK // HLA-DMA // HLA-DMA /…	0.000119451
GO:0032642	biological_process	regulation of chemokine production	5	HMOX1 // PYCARD // TLR2 // TLR7 // IL18 // CSF1R // TLR4 // IL1B // IL1B // IL1B // IL1B // MYD88 // MYD88 // MIF // HIF1A	0.000127124
GO:0045059	biological_process	positive thymic T cell selection	13	PTPRC // PTPRC // DOCK2 // DOCK2 // HLA-DMA // HLA-DMA // CD3D	0.000133628
GO:0009186	biological_process	deoxyribonucleoside diphosphate metabolic process	8	RRM2 // RRM2 // DTYMK // DTYMK // DTYMK // DTYMK // DTYMK	0.000133628
GO:0051224	biological_process	negative regulation of protein transport	7	CD36 // CD36 // CD36 // CD36 // CD36 // CD36 // CD36 // CD36 // SRGN // NR1H3 // NR1H3 // NR1H3 // NR1H3 // NR1H3 // NR1H3 // NR1H3 // NR1H3 // CSK // RHBDF2 // RHBDF2 // RHBDF2 // RHBDF2 // RHBDF2 // IL10 // F2R	0.000134786
GO:0009266	biological_process	response to temperature stimulus	3	CD14 // CD14 // CD14 // CD14 // CCL2 // TFEC // LYN // LYN // HTR2B // IL18 // OSM // OSM // ARRB2 // ARRB2 // CXCL10 // ADM // ADM // ADRB2 // THBS1 // PPARG // PPARG // PPARG // PPARG // ST8SIA1 // ST8SIA1 // MICB	0.000140092
GO:0002283	biological_process	neutrophil activation involved in immune response	7	TYROBP // SYK // FCER1G // PPBP // MYO1F // STXBP2	0.000142571
GO:0033194	biological_process	response to hydroperoxide	4	CD36 // CD36 // CD36 // CD36 // CD36 // CD36 // CD36 // CD36	0.000146474
GO:0045060	biological_process	negative thymic T cell selection	13	PTPRC // PTPRC // DOCK2 // DOCK2 // CCR7 // CCR7 // CCR7 // CD28	0.000146474
GO:0045779	biological_process	negative regulation of bone resorption	7	TNFRSF11B // CSK // CSK // CSK // CSK // P2RX7 // P2RX7 // TNFAIP3	0.000146474
GO:0033674	biological_process	positive regulation of kinase activity	9	CHI3L1 // CXCR4 // PTPRC // PTPRC // CCL2 // SYK // LYN // LYN // IL8 // HTR2B // C5AR1 // DAB2 // DAB2 // DAB2 // DAB2 // CCL19 // MAP3K1 // PAK1 // PTPLAD1 // CSF1R // CSF1R // FCER1A // DNAJC3 // FGR // TLR4 // IL1RN // STK4 // CCR7 // FPR1 // MAP3K2 // IL1B // IGFBP1 // FLT1 // CSK // CSK // CSK // CSK // SLC11A1 // NCKAP1L // ADRB2 // PDGFRA // THBS1 // KDELR3 // CD4 // EZH2 // TGFBR1 // MIF…	0.000149755
GO:0006879	biological_process	cellular iron ion homeostasis	9	HMOX1 // CP // CP // CP // CP // CP // HAMP // ATP6V1F // IREB2 // IREB2 // SLC11A1 // ATP6V1A // CYBRD1 // ATP6V1B2 // TFRC // TFRC // TFRC // HIF1A // HIF1A	0.000184093
GO:0031399	biological_process	regulation of protein modification process	7	CHI3L1 // CD36 // CD36 // CD36 // CD36 // CD36 // CD36 // CD36 // CD36 // CCL5 // APOE // GMFG // SAMSN1 // SAMSN1 // CXCR4 // PTPRC // PTPRC // PYCARD // ITGB2 // CCL2 // PTPN6 // PTPN6 // PTPN6 // PTPRJ // HCLS1 // SYK // LYN // LYN // IL8 // HTR2B // MLLT1 // C5AR1 // DAB2 // DAB2 // DAB2 // DAB2 // CCL19 // GREM1 // FABP4 // CCNK // CCNK // CCNK // CCNK // OSM // MAP3K1 // PAK1 // PTPLAD1 // …	0.000184774
GO:0044236	biological_process	multicellular organismal metabolic process	3	MMP12 // MMP9 // MMP1 // MMP7 // CTSB // CTSD // AKR1C3 // CTSL1 // CTSK // COL1A1 // ACE // COL11A1 // MMP2 // MMP2 // MMP2 // P2RX7 // P2RX7 // MMP8 // HIF1A // HIF1A	0.000192878
GO:0055088	biological_process	lipid homeostasis	5	APOE // APOE // APOE // LPL // ABCA1 // ABCG1 // FABP4 // NPC2 // SOAT1 // NR1H3 // NR1H3 // NR1H3 // NR1H3 // NR1H3 // NR1H3 // NR1H3 // NR1H3 // SCARB1 // NPC1 // APOC2 // PPARG	0.000195824
GO:0007264	biological_process	small GTPase mediated signal transduction	6	HMOX1 // HMOX1 // GNA13 // GNA13 // DOCK2 // DOCK2 // DOCK2 // DOCK2 // DOCK2 // DOCK2 // IQGAP2 // IQGAP2 // IQGAP2 // IQGAP2 // ARL4C // RASGRP3 // RASGRP3 // RASGRP3 // RASGRP3 // RASGRP3 // RASGRP3 // RASGRP3 // AIF1 // RASGRP1 // RASGRP1 // RASGRP1 // RASGRP1 // RASGRP1 // RASGRP1 // RASGRP1 // RASGRP1 // RALA // RALA // RALA // RAC2 // RAC2 // RAC2 // RAC2 // RAC2 // PTPLAD1 // PTPLAD1 // P…	0.000196304
GO:0006887	biological_process	exocytosis	7	CD36 // CCL5 // HCK // SERPINA1 // CCR1 // SYK // FCER1G // CCL8 // F13A1 // LYN // LYN // SRGN // PLEK // RALA // PPBP // PAK1 // MYO5A // CFD // SYTL2 // MYO1F // PECAM1 // LAT2 // THBS1 // TIMP1 // SERPINE1 // IGF1 // PSAP // P2RX7 // P2RX7 // RAB31 // TGFB1 // VEGFC // PF4 // STXBP2 // STXBP2 // STXBP2 // STXBP2 // STXBP2 // STXBP2 // STXBP2 // STXBP2	0.000203596
GO:0008064	biological_process	regulation of actin polymerization or depolymerization	9	HCK // CAPG // PYCARD // HCLS1 // PLEK // MAP3K1 // CORO1A // CORO1A // CORO1A // CORO1A // CCR7 // ARPC1B // ARPC1B // ARPC1B // ARPC1B // ARPC1B // ARPC1B // ARPC1B // ARPC1B // ARPC1B // GRB2 // GRB2 // NCKAP1L // TMSB10 // CXCL12	0.000206146
GO:0051665	biological_process	membrane raft localization	5	DOCK2 // DOCK2 // RALA // RALA // CD2	0.000206146
GO:2000370	biological_process	positive regulation of clathrin-mediated endocytosis	9	SCYL2 // DAB2 // DAB2 // DAB2 // DAB2	0.000206146
GO:0006233	biological_process	dTDP biosynthetic process	12	DTYMK // DTYMK // DTYMK // DTYMK // DTYMK	0.000206146
GO:0046072	biological_process	dTDP metabolic process	11	DTYMK // DTYMK // DTYMK // DTYMK // DTYMK	0.000206146
GO:0032268	biological_process	regulation of cellular protein metabolic process	6	CHI3L1 // CD36 // CD36 // CD36 // CD36 // CD36 // CD36 // CD36 // CD36 // CCL5 // APOE // GMFG // SAMSN1 // SAMSN1 // CXCR4 // PTPRC // PTPRC // PYCARD // ITGB2 // CCL2 // TIMP2 // TIMP2 // PTPN6 // PTPN6 // PTPN6 // PTPRJ // HCLS1 // SYK // LYN // LYN // IL8 // HTR2B // MLLT1 // C5AR1 // DAB2 // DAB2 // DAB2 // DAB2 // CCL19 // GREM1 // FABP4 // CCNK // CCNK // CCNK // CCNK // OSM // MAP3K1 // P…	0.000215584
GO:0032963	biological_process	collagen metabolic process	5	MMP12 // MMP9 // MMP1 // MMP7 // CTSB // CTSD // CTSL1 // CTSK // COL1A1 // COL11A1 // MMP2 // MMP2 // MMP2 // P2RX7 // P2RX7 // MMP8 // HIF1A // HIF1A	0.000225283
GO:0030832	biological_process	regulation of actin filament length	8	HCK // CAPG // PYCARD // HCLS1 // PLEK // MAP3K1 // CORO1A // CORO1A // CORO1A // CORO1A // CCR7 // ARPC1B // ARPC1B // ARPC1B // ARPC1B // ARPC1B // ARPC1B // ARPC1B // ARPC1B // ARPC1B // GRB2 // GRB2 // NCKAP1L // TMSB10 // CXCL12	0.000229479
GO:1900407	biological_process	regulation of cellular response to oxidative stress	6	CD36 // CD36 // CD36 // CD36 // CD36 // CD36 // CD36 // CD36	0.00023349
GO:1901031	biological_process	regulation of response to reactive oxygen species	5	CD36 // CD36 // CD36 // CD36 // CD36 // CD36 // CD36 // CD36	0.00023349
GO:0032305	biological_process	positive regulation of icosanoid secretion	9	IL1B // IL1B // IL1B // IL1B // P2RX4 // MIF // P2RX7 // P2RX7	0.00023349
GO:0051493	biological_process	regulation of cytoskeleton organization	6	S100A8 // S100A9 // GPR65 // HCK // STMN3 // STMN3 // CAPG // PYCARD // HCLS1 // PLEK // MAP3K1 // PAK1 // PAK1 // PAK1 // PAK1 // PAK1 // PAK1 // PAK1 // CSF1R // CSF1R // CORO1A // CORO1A // CORO1A // CORO1A // MYO1F // S1PR1 // CCR7 // ARPC1B // ARPC1B // ARPC1B // ARPC1B // ARPC1B // ARPC1B // ARPC1B // ARPC1B // ARPC1B // GRB2 // GRB2 // ABL2 // NCKAP1L // PDGFRA // TMSB10 // CXCL12 // P2RX7…	0.000237585
GO:0071825	biological_process	protein-lipid complex subunit organization	4	APOC1 // PLA2G7 // APOE // APOE // APOE // LPL // ABCA1 // ABCG1 // SOAT1 // SCARB1 // APOC2	0.000240912
GO:0071827	biological_process	plasma lipoprotein particle organization	5	APOC1 // PLA2G7 // APOE // APOE // APOE // LPL // ABCA1 // ABCG1 // SOAT1 // SCARB1 // APOC2	0.000240912
GO:0048771	biological_process	tissue remodeling	3	ACP5 // ACP5 // ACP5 // LIPA // LIPA // LIPA // RAC2 // RAC2 // RAC2 // CTSK // ITGA4 // ITGA4 // ADRB2 // ACE // IGF1 // TGFB1 // F2R // TPP1 // CCR2 // CCR2 // HIF1A // HIF1A	0.000240912
GO:2000379	biological_process	positive regulation of reactive oxygen species metabolic process	6	CD36 // CD36 // CD36 // CD36 // CD36 // CD36 // CD36 // CD36 // IL18 // AKR1C3 // GRB2 // THBS1 // TGFB1	0.000240912
GO:0050869	biological_process	negative regulation of B cell activation	8	SAMSN1 // SAMSN1 // MNDA // LYN // LYN // CDKN2A // TNFAIP3 // TNFAIP3 // TNFAIP3 // TNFAIP3 // IL10	0.000240912
GO:0060402	biological_process	calcium ion transport into cytosol	12	PTPRC // PTPRC // CCR5 // HTR2B // CCL19 // PLCG2 // PLCG2 // CCR7 // P2RX7 // P2RX7 // LCK // LCK // F2R	0.000240912
GO:0051234	biological_process	establishment of localization	2	APOC1 // CHI3L1 // IGKC // CD36 // CD36 // CD36 // CD36 // CD36 // CD36 // CD36 // CD36 // VAMP8 // VAMP8 // VAMP8 // HMOX1 // LAPTM5 // CCL5 // APOE // APOE // APOE // APOE // CP // CP // CP // CP // CP // CD14 // HBB // HCK // HCK // LCP2 // PTPRC // PTPRC // SNX10 // SERPINA1 // PYCARD // MMP7 // SLC14A1 // DOCK2 // DOCK2 // CCR5 // ABCA1 // STEAP4 // CCR1 // BID // SYK // HLA-DMA // HLA-DMA /…	0.000247479
GO:0030833	biological_process	regulation of actin filament polymerization	10	HCK // CAPG // PYCARD // HCLS1 // MAP3K1 // CORO1A // CORO1A // CORO1A // CORO1A // CCR7 // ARPC1B // ARPC1B // ARPC1B // ARPC1B // ARPC1B // ARPC1B // ARPC1B // ARPC1B // ARPC1B // GRB2 // GRB2 // NCKAP1L // TMSB10	0.000258602
GO:0045595	biological_process	regulation of cell differentiation	4	SPP1 // CD36 // CD36 // CD36 // CD36 // CD36 // CD36 // CD36 // CD36 // APOE // APOE // APOE // LPL // LPL // LPL // LPL // CXCR4 // TMEM176B // PTPRC // PTPRC // LILRB2 // LILRB4 // ABCA1 // TIMP2 // TIMP2 // CCR1 // PTPN6 // PTPN6 // PTPN6 // HCLS1 // SYK // HLA-DMA // HLA-DMA // ABCG1 // LYN // LYN // VNN1 // CD86 // HLA-B // DAB2 // DAB2 // DAB2 // DAB2 // CCL19 // CA2 // GREM1 // IL7R // IL7…	0.000266216
GO:0042157	biological_process	lipoprotein metabolic process	5	APOC1 // APOC1 // APOC1 // APOC1 // APOC1 // APOC1 // PLA2G7 // APOE // APOE // APOE // APOE // LPL // ABCA1 // ABCG1 // PLAUR // SCARB1 // APOC2 // APOL3 // CD4 // OLR1 // OLR1 // OLR1 // OLR1 // OLR1 // OLR1 // PPT1 // PPT1 // PPT1	0.000273731
GO:0050848	biological_process	regulation of calcium-mediated signaling	6	SYK // PLEK // FCER1A // CCL4 // CD8A // ITGAL // ITGAL // ITGAL // P2RX4 // CD4 // CD4 // IGF1	0.000285492
GO:0060401	biological_process	cytosolic calcium ion transport	10	PTPRC // PTPRC // CCR5 // HTR2B // CCL19 // PLCG2 // PLCG2 // CCR7 // P2RX7 // P2RX7 // LCK // LCK // F2R	0.000298962
GO:0030041	biological_process	actin filament polymerization	8	AIF1 // GAS7 // GAS7 // GAS7 // GAS7 // GAS7 // GAS7 // GAS7 // WAS // WAS	0.000313001
GO:0032945	biological_process	negative regulation of mononuclear cell proliferation	7	MNDA // LILRB2 // HLA-DRB1 // HLA-DRB1 // HLA-DRB1 // HLA-DRB1 // HLA-DRB1 // VSIG4 // PTPN6 // PTPN6 // PTPN6 // LYN // LYN // LST1 // CDKN2A // IL10 // TGFB1	0.000314994
GO:0050672	biological_process	negative regulation of lymphocyte proliferation	8	MNDA // LILRB2 // HLA-DRB1 // HLA-DRB1 // HLA-DRB1 // HLA-DRB1 // HLA-DRB1 // VSIG4 // PTPN6 // PTPN6 // PTPN6 // LYN // LYN // LST1 // CDKN2A // IL10 // TGFB1	0.000314994
GO:0042159	biological_process	lipoprotein catabolic process	6	APOE // APOE // APOE // PPT1 // PPT1 // PPT1	0.000318729
GO:0032611	biological_process	interleukin-1 beta production	5	ABCA1 // CASP1 // IL1B // IL1B // IL1B // IL1B	0.000318729
GO:0042098	biological_process	T cell proliferation	7	CXCR4 // PTPRC // PTPRC // ITGAM // DOCK2 // DOCK2 // PSMB10 // CRTAM // SLC11A1 // ITGAL // ITGAL // ITGAL // CXCL12 // P2RX7 // P2RX7 // CADM1	0.000321462
GO:0001894	biological_process	tissue homeostasis	5	ACP5 // ACP5 // ACP5 // CTSH // LIPA // LIPA // LIPA // RAC2 // RAC2 // RAC2 // TLR4 // CORO1A // CORO1A // CORO1A // CORO1A // SASH3 // CTSK // P2RX4 // ADRB2 // P2RX7 // P2RX7 // F2R // TPP1	0.000322561
GO:0002573	biological_process	myeloid leukocyte differentiation	9	MMP9 // SNX10 // CSF1R // CSF1R // CEBPA // SPI1 // IREB2 // IREB2 // HHEX // HHEX // PPARG // IFI16 // TFRC // TFRC // TFRC // BATF // UBD // TGFB1 // CBFA2T3	0.00035794
GO:0043383	biological_process	negative T cell selection	12	PTPRC // PTPRC // DOCK2 // DOCK2 // CCR7 // CCR7 // CCR7 // CD28	0.000358629
GO:0042832	biological_process	defense response to protozoan	5	IRF8 // IRF8 // IRF8 // IRF8 // IRF8 // IRF8 // SLC11A1 // BATF	0.000358629
GO:0090382	biological_process	phagosome maturation	4	NCF2 // CYBA // ATP6V1F // NCF4 // CORO1A // SLC11A1 // ATP6V1A // CYBB // ATP6V1B2 // P2RX7 // P2RX7 // RAB31	0.000359526
GO:0008219	biological_process	cell death	3	S100A8 // S100A9 // BCL2A1 // LYZ // HMOX1 // HMOX1 // APOE // CD14 // GPR65 // CXCR4 // PYCARD // ITGB2 // BID // PTPN6 // TNFRSF21 // CASP1 // CASP1 // CASP1 // CASP1 // LYN // TNFSF10 // SRGN // CTSD // IFI27 // SGK1 // C5AR1 // DAB2 // CXCR2 // CXCR2 // CXCR2 // CXCR2 // CXCR2 // GZMA // GREM1 // OSM // OSM // MAP3K1 // PAK1 // GZMH // XIAP // GZMB // VAV1 // LY86 // HK2 // HK2 // ARHGEF3 // …	0.000363422
GO:2000401	biological_process	regulation of lymphocyte migration	8	CCL5 // PYCARD // CCL2 // AIF1 // CCL7 // CCL4 // ECM1 // STK10 // CCR2	0.000363862
GO:0007033	biological_process	vacuole organization	4	ABCA1 // CTSD // CTSD // CTSD // HEXB // HEXB // HEXB // ACP2 // ACP2 // PPT1 // PPT1 // PPT1 // GAA // GAA // GAA // TPP1 // TPP1	0.000363862
GO:0045408	biological_process	regulation of interleukin-6 biosynthetic process	7	TLR1 // TLR1 // TLR1 // TLR1 // TLR1 // IL1B // IL1B // IL1B // IL1B	0.000363862
GO:0071902	biological_process	positive regulation of protein serine/threonine kinase activity	11	CHI3L1 // CXCR4 // PTPRC // PTPRC // SYK // HTR2B // C5AR1 // DAB2 // DAB2 // DAB2 // DAB2 // CCL19 // PAK1 // PTPLAD1 // CSF1R // CSF1R // FCER1A // TLR4 // IL1RN // STK4 // FPR1 // MAP3K2 // IL1B // FLT1 // CSK // CSK // CSK // CSK // THBS1 // EZH2 // MIF // P2RX7 // P2RX7 // MAPKAPK3 // TGFB1 // FZD8 // CDK1 // S100A12	0.000376112
GO:0000302	biological_process	response to reactive oxygen species	4	HMOX1 // HMOX1 // APOE // HBB // UCP2 // UCP2 // CCL19 // IL18 // AKR1C3 // SOD2 // SOD2 // SOD2 // CCR7 // TXNIP // COL1A1 // PPIF // OLR1 // OLR1 // OLR1 // OLR1 // OLR1 // OLR1 // TNFAIP3 // LCK // LCK // ECT2 // CDK1	0.000405382
GO:0045730	biological_process	respiratory burst	3	CD52 // HCK // NCF2 // CYBA // SLC11A1 // CYBB // CD55	0.000417641
GO:0045080	biological_process	positive regulation of chemokine biosynthetic process	8	HMOX1 // IL1B // IL1B // IL1B // IL1B // MYD88 // MYD88	0.000417641
GO:0046635	biological_process	positive regulation of alpha-beta T cell activation	9	PTPRC // PTPRC // SYK // CD86 // CCL19 // IL18 // SASH3 // CD83 // CD28 // IKZF1 // NCKAP1L // CD80 // PNP // CCR2	0.000417695
GO:0045861	biological_process	negative regulation of proteolysis	8	TIMP2 // TIMP2 // NR1H3 // NR1H3 // NR1H3 // NR1H3 // NR1H3 // NR1H3 // NR1H3 // NR1H3 // PLAT // DNAJC1 // TIMP1 // IL10	0.000417695
GO:0046634	biological_process	regulation of alpha-beta T cell activation	8	PTPRC // PTPRC // SYK // CD86 // CCL19 // IL18 // SASH3 // CD83 // CD28 // IKZF1 // NCKAP1L // CD80 // PNP // IL12RB1 // JAK3 // CXCR6 // CCR2	0.000420864
GO:0000165	biological_process	MAPK cascade	7	CCL5 // CTSH // CCR5 // CCL2 // SYK // RASGRP3 // HTR2B // DAB2 // DAB2 // DAB2 // DAB2 // CCL19 // IL18 // PAK1 // PTPLAD1 // PTPLAD1 // PTPLAD1 // FCER1A // MAPK13 // SCG2 // MAP3K2 // IL1B // RPS6KA1 // MYD88 // MYD88 // OXTR // OXTR // OXTR // MAPKAPK3 // TGFB1 // CDK1 // DUSP4 // DUSP6	0.000439254
GO:0022414	biological_process	reproductive process	2	SPP1 // MMP9 // HCK // CXCR4 // CTSH // CTSH // MMP1 // ANPEP // FCGR2B // VCAM1 // CCR5 // CCL2 // SYK // PILRA // LYN // CLEC5A // CD86 // HLA-B // HLA-B // HLA-B // HLA-B // HLA-B // HLA-B // HLA-B // HLA-B // HLA-B // HLA-B // HLA-B // HLA-B // HLA-B // HLA-B // HLA-B // HLA-B // HLA-B // HLA-B // HLA-B // HLA-B // HLA-B // HLA-B // HLA-B // HLA-B // HLA-B // HLA-B // HLA-B // HLA-B // HLA-B …	0.000453612
GO:0071901	biological_process	negative regulation of protein serine/threonine kinase activity	11	APOE // PYCARD // PTPN6 // PTPN6 // PTPN6 // PTPRJ // LYN // LYN // IL1B // IL1B // IL1B // IL1B // IRAK3 // CDKN2A // TNFAIP3 // TNFAIP3 // TNFAIP3 // TNFAIP3 // DUSP4 // DUSP6	0.000458277
GO:0016265	biological_process	death	2	S100A8 // S100A9 // BCL2A1 // LYZ // HMOX1 // HMOX1 // APOE // CD14 // GPR65 // CXCR4 // PYCARD // ITGB2 // BID // PTPN6 // TNFRSF21 // CASP1 // CASP1 // CASP1 // CASP1 // LYN // TNFSF10 // SRGN // CTSD // IFI27 // SGK1 // C5AR1 // DAB2 // CXCR2 // CXCR2 // CXCR2 // CXCR2 // CXCR2 // GZMA // GREM1 // OSM // OSM // MAP3K1 // PAK1 // GZMH // XIAP // GZMB // VAV1 // LY86 // HK2 // HK2 // ARHGEF3 // …	0.000459048
GO:0051345	biological_process	positive regulation of hydrolase activity	6	S100A8 // S100A9 // CCL5 // GPR65 // GNA13 // CTSH // RGS1 // PYCARD // CCL2 // CASP1 // RASGRP3 // TNFSF10 // GNA15 // IL8 // IFI27 // C5AR1 // PLEK // CCL19 // PTPLAD1 // CR1 // DNAJC3 // ADAP2 // NR1H3 // TBC1D2 // DOCK4 // S1PR1 // CCR7 // ITK // DNAJC1 // SELE // RGS10 // APOC2 // BCL2L11 // IGFBP1 // FLT1 // NCKAP1L // PDGFRA // ARHGAP15 // BCAP31 // PLSCR1 // GMIP // PPARG // KDELR3 // IFI…	0.000466245
GO:0046364	biological_process	monosaccharide biosynthetic process	6	FBP1 // PGD // PGD // PGD // PGD // TALDO1 // SDS // AKR1A1 // AKR1A1 // PCK2 // PCK2 // PCK2 // PCK2 // PCK2 // PCK2 // PCK2 // PCK2	0.00048682
GO:0006040	biological_process	amino sugar metabolic process	4	CHI3L1 // NPL // CHIT1 // CHIT1 // CHIT1 // CHST2 // GNPDA1 // GNPDA1 // GNPDA1 // GNPDA1 // GNPDA1 // GNPDA1 // GNPDA1 // GNPDA1	0.000500429
GO:0006979	biological_process	response to oxidative stress	3	CD36 // CD36 // CD36 // CD36 // CD36 // CD36 // CD36 // CD36 // HMOX1 // HMOX1 // APOE // APOE // APOE // HBB // VNN1 // UCP2 // UCP2 // CCL19 // SEPP1 // IL18 // AKR1C3 // SOD2 // SOD2 // SOD2 // CCR7 // TXNIP // PTGS1 // COL1A1 // PPIF // OLR1 // OLR1 // OLR1 // OLR1 // OLR1 // OLR1 // MICB // TNFAIP3 // LCK // LCK // ECT2 // ATOX1 // ATOX1 // CDK1 // HIF1A // HIF1A	0.000503999
GO:0034122	biological_process	negative regulation of toll-like receptor signaling pathway	7	LYN // LYN // ARRB2 // ARRB2 // IRAK3 // TNFAIP3 // TNFAIP3 // TNFAIP3 // TNFAIP3	0.000507295
GO:0006044	biological_process	N-acetylglucosamine metabolic process	6	CHST2 // GNPDA1 // GNPDA1 // GNPDA1 // GNPDA1 // GNPDA1 // GNPDA1 // GNPDA1 // GNPDA1	0.000507295
GO:0009306	biological_process	protein secretion	7	CHI3L1 // LCP2 // ABCA1 // LYN // LYN // PLEK // CCL19 // CCR7 // CCR7 // CCR7 // SCG2 // BTN3A2 // CXCL10 // PNP // S100A12	0.000518294
GO:0045860	biological_process	positive regulation of protein kinase activity	10	CHI3L1 // CXCR4 // PTPRC // PTPRC // CCL2 // SYK // IL8 // HTR2B // C5AR1 // DAB2 // DAB2 // DAB2 // DAB2 // CCL19 // MAP3K1 // PAK1 // PTPLAD1 // CSF1R // CSF1R // FCER1A // DNAJC3 // TLR4 // IL1RN // STK4 // CCR7 // FPR1 // MAP3K2 // IL1B // IGFBP1 // FLT1 // CSK // CSK // CSK // CSK // SLC11A1 // NCKAP1L // ADRB2 // THBS1 // KDELR3 // CD4 // EZH2 // TGFBR1 // MIF // P2RX7 // P2RX7 // MAPKAPK3 …	0.000530278
GO:0080184	biological_process	response to phenylpropanoid	5	CD36 // CD36 // CD36 // CD36 // CD36 // CD36 // CD36 // CD36	0.000531954
GO:0032660	biological_process	regulation of interleukin-17 production	5	TLR2 // IL18 // TLR4 // NCKAP1L // MYD88 // MYD88 // MYD88 // TGFB1	0.000531954
GO:0002335	biological_process	mature B cell differentiation	11	PLCG2 // PLCG2 // GPR183 // LGALS8 // LGALS8 // LGALS8 // LGALS8 // LGALS8	0.000531954
GO:0014070	biological_process	response to organic cyclic compound	4	SPP1 // CD36 // CD36 // CD36 // CD36 // CD36 // CD36 // CD36 // CD36 // HMOX1 // HMOX1 // CCL5 // APOE // APOE // APOE // CCR5 // NCF2 // NCF2 // NCF2 // CCL2 // BID // KYNU // CASP1 // LYN // LYN // CCL19 // CYBA // PLIN2 // PLIN2 // CA2 // IL18 // NR1H3 // AKR1C3 // IL1RN // AQP9 // PLAT // PLAT // PLAT // MLL2 // CD83 // CEBPA // NPC1 // TXNIP // TNFRSF11B // IL1B // IL1B // IL1B // IL1B // CO…	0.000539696
GO:0001909	biological_process	leukocyte mediated cytotoxicity	3	CTSH // CTSH // PTPN6 // PTPN6 // PTPN6 // SLAMF7 // CTSC // CRTAM // CADM1 // STXBP2	0.000547785
GO:0006098	biological_process	pentose-phosphate shunt	12	PGD // PGD // PGD // PGD // PGD // PGD // PGD // PGD // TALDO1 // TALDO1	0.000547785
GO:0007566	biological_process	embryo implantation	5	SPP1 // MMP9 // GRN // GRN // GRN // GRN // GRN // GRN // GRN // GRN // GRN // LAMB1 // LAMB1 // IL1B // MMP2 // MMP2 // MMP2	0.000557124
GO:0051056	biological_process	regulation of small GTPase mediated signal transduction	6	APOE // GPR65 // STMN3 // STMN3 // ABCA1 // TIMP2 // TIMP2 // IQGAP2 // FBP1 // RASGRP3 // RASGRP3 // RASGRP3 // RASGRP3 // RASGRP3 // CCL19 // RASGRP1 // RASGRP1 // RASGRP1 // RASGRP1 // RASGRP1 // RASGRP1 // RAC2 // ARAP2 // ADAP2 // ADAP2 // ADAP2 // ADAP2 // VAV1 // VAV1 // VAV1 // VAV1 // TBC1D2 // ARHGEF3 // ARHGEF3 // ARHGEF3 // ARHGEF3 // ARHGEF3 // ARHGEF3 // ARHGEF3 // DOCK4 // ARHGDIB …	0.000569327
GO:0006959	biological_process	humoral immune response	3	IGKC // C1QB // HLA-DQB1 // TREM1 // MMP7 // HLA-DRB1 // HLA-DRB1 // HLA-DRB1 // HLA-DRB1 // HLA-DRB1 // HLA-DRB1 // C1QA // CCL2 // VSIG4 // IGKV4-1 // TREM2 // CR1 // CFD // LY86 // GPR183 // CD83 // C2 // PSMB10 // BLNK // CD28 // POU2AF1 // CFH // C1R // C1R // CD55 // CFP	0.000590393
GO:0032269	biological_process	negative regulation of cellular protein metabolic process	7	APOE // GMFG // SAMSN1 // SAMSN1 // PTPRC // PTPRC // PYCARD // TIMP2 // TIMP2 // PTPN6 // PTPN6 // PTPN6 // PTPRJ // LYN // LYN // MLLT1 // GREM1 // FABP4 // DNAJC3 // NR1H3 // NR1H3 // NR1H3 // NR1H3 // NR1H3 // NR1H3 // NR1H3 // NR1H3 // ARRB2 // ARRB2 // PLAT // DNAJC1 // SPI1 // PSMB8 // PSMB10 // IL1B // IL1B // IL1B // IL1B // DDIT4 // PSMB9 // ISG15 // IRAK3 // TIMP1 // CDKN2A // CDKN2A /…	0.000610707
GO:0002246	biological_process	wound healing involved in inflammatory response	5	HMOX1 // TGFB1 // F2R // HIF1A // HIF1A	0.000613239
GO:0001915	biological_process	negative regulation of T cell mediated cytotoxicity	9	PTPRC // PTPRC // IL7R // IL7R // IL7R	0.000613239
GO:0010572	biological_process	positive regulation of platelet activation	8	PTPRJ // PLEK // TLR4 // PDPN // PDPN	0.000613239
GO:0002885	biological_process	positive regulation of hypersensitivity	10	FCER1G // FCER1A // CCR7 // CCR7 // CCR7	0.000613239
GO:0019322	biological_process	pentose biosynthetic process	7	PGD // PGD // PGD // PGD // TALDO1	0.000613239
GO:0002317	biological_process	plasma cell differentiation	13	LGALS8 // LGALS8 // LGALS8 // LGALS8 // LGALS8	0.000613239
GO:0002677	biological_process	negative regulation of chronic inflammatory response	8	TNFAIP3 // TNFAIP3 // TNFAIP3 // TNFAIP3 // IL10	0.000613239
GO:0009139	biological_process	pyrimidine nucleoside diphosphate biosynthetic process	9	DTYMK // DTYMK // DTYMK // DTYMK // DTYMK	0.000613239
GO:0009196	biological_process	pyrimidine deoxyribonucleoside diphosphate metabolic process	9	DTYMK // DTYMK // DTYMK // DTYMK // DTYMK	0.000613239
GO:0009197	biological_process	pyrimidine deoxyribonucleoside diphosphate biosynthetic process	10	DTYMK // DTYMK // DTYMK // DTYMK // DTYMK	0.000613239
GO:0010985	biological_process	negative regulation of lipoprotein particle clearance	5	APOC1 // APOC2 // CSK // CSK // CSK // CSK	0.000615204
GO:0097067	biological_process	cellular response to thyroid hormone stimulus	7	CTSS // CTSH // CTSH // CTSB // CTSL1 // LMO2	0.000615204
GO:0071675	biological_process	regulation of mononuclear cell migration	8	CCL5 // C3AR1 // C3AR1 // CCL2 // PTPRJ // THBS1	0.000615204
GO:0048513	biological_process	organ development	5	SPP1 // CHI3L1 // MMP9 // C1QB // C1QB // C1QB // C1QB // ACP5 // ACP5 // ACP5 // CSTA // CXCR4 // KRT14 // TMEM176B // CTSH // CTSH // PTPRC // PTPRC // SNX10 // LCP1 // LCP1 // LCP1 // VCAM1 // DOCK2 // DOCK2 // IBSP // ITGAX // CCL2 // BID // PTPRJ // HCLS1 // LIPA // LIPA // LIPA // SYK // HLA-DMA // HLA-DMA // CTSZ // IRF8 // IRF8 // IRF8 // IRF8 // IRF8 // IRF8 // CD3D // LYN // LYN // SRGN…	0.000647694
GO:0046641	biological_process	positive regulation of alpha-beta T cell proliferation	10	PTPRC // PTPRC // SYK // IL18 // CD28 // CD80 // CCR2	0.000659991
GO:0042326	biological_process	negative regulation of phosphorylation	8	APOE // GMFG // SAMSN1 // SAMSN1 // PTPRC // PTPRC // PYCARD // PTPN6 // PTPN6 // PTPN6 // PTPRJ // LYN // LYN // MLLT1 // GREM1 // FABP4 // DNAJC3 // BIRC3 // IL1B // IL1B // IL1B // IL1B // DDIT4 // IRAK3 // PPIF // CDKN2A // CDKN2A // TNFAIP3 // TNFAIP3 // TNFAIP3 // TNFAIP3 // TGFB1 // DUSP4 // IGFBP3 // DUSP6 // DUSP6	0.000662449
GO:0002712	biological_process	regulation of B cell mediated immunity	7	PTPRC // PTPRC // PTPN6 // PTPN6 // PTPN6 // FCER1G // FCER1A // CR1 // CD28 // IL10 // TGFB1 // BTK	0.000662449
GO:0033673	biological_process	negative regulation of kinase activity	9	APOE // GMFG // PTPRC // PYCARD // PTPN6 // PTPN6 // PTPN6 // PTPRJ // LYN // LYN // MLLT1 // FABP4 // DNAJC3 // IL1B // IL1B // IL1B // IL1B // CSK // CSK // CSK // CSK // IRAK3 // CDKN2A // CDKN2A // TNFAIP3 // TNFAIP3 // TNFAIP3 // TNFAIP3 // DUSP4 // DUSP6	0.000662928
GO:0070098	biological_process	chemokine-mediated signaling pathway	8	CCL5 // CCR5 // CCL2 // CCR1 // CCRL2 // CX3CR1 // CCR7 // CXCL12 // CCR2	0.000671342
GO:0033198	biological_process	response to ATP	6	CASP1 // IL1B // IL1B // IL1B // IL1B // SELL // P2RX4 // P2RX7 // P2RX7	0.000671342
GO:2000191	biological_process	regulation of fatty acid transport	7	SYK // IL1B // IL1B // IL1B // IL1B // P2RX4 // THBS1 // MIF // P2RX7 // P2RX7	0.000694257
GO:0006740	biological_process	NADPH regeneration	11	PGD // PGD // PGD // PGD // PGD // PGD // PGD // PGD // TALDO1 // TALDO1	0.000694257
GO:0032502	biological_process	developmental process	1	SPP1 // MMP12 // CHI3L1 // MMP9 // C1QB // C1QB // C1QB // C1QB // ACP5 // ACP5 // ACP5 // HMOX1 // HMOX1 // TYROBP // APOE // APOE // APOE // GPR65 // CSTA // GNA13 // GNA13 // HCK // STMN3 // STMN3 // CXCR4 // KRT14 // TMEM176B // CTSH // CTSH // PTPRC // PTPRC // CPM // ANPEP // SNX10 // LCP1 // LCP1 // LCP1 // ITGB2 // ITGB2 // ITGB2 // ITGB2 // ITGB2 // ITGB2 // ITGB2 // ITGB2 // ITGB2 // IT…	0.000717039
GO:0048856	biological_process	anatomical structure development	2	SPP1 // MMP12 // CHI3L1 // MMP9 // C1QB // C1QB // C1QB // C1QB // ACP5 // ACP5 // ACP5 // HMOX1 // HMOX1 // TYROBP // APOE // APOE // APOE // CSTA // GNA13 // GNA13 // HCK // STMN3 // STMN3 // CXCR4 // KRT14 // TMEM176B // CTSH // CTSH // PTPRC // PTPRC // CPM // ANPEP // SNX10 // LCP1 // LCP1 // LCP1 // ITGAM // VCAM1 // DOCK2 // DOCK2 // IBSP // ITGAX // CCL2 // TIMP2 // TIMP2 // BID // PTPRJ …	0.000726211
GO:0033121	biological_process	regulation of purine nucleotide catabolic process	9	GPR65 // STMN3 // STMN3 // RGS1 // RASGRP3 // RASGRP3 // RASGRP3 // RASGRP3 // RASGRP3 // RASGRP3 // CCL19 // PTPLAD1 // ARAP2 // ADAP2 // ADAP2 // ADAP2 // ADAP2 // TBC1D2 // DOCK4 // ARRB2 // ARRB2 // S1PR1 // CCR7 // DNAJC1 // RGS10 // NCKAP1L // ARHGAP15 // PPIF // PLSCR1 // GMIP // GIT2 // GIT2 // GIT2 // GIT2 // GIT2 // EZH2 // ASAP1 // ASAP1 // FGD6 // ECT2 // SIPA1 // RP2	0.000730421
GO:0002831	biological_process	regulation of response to biotic stimulus	4	HCK // DOCK2 // LY86 // APOBEC3G // BIRC3 // CD28 // CRTAM // PACS1 // CD4 // IL12RB1 // MIF // MICB // TNFAIP3 // CD180 // LCK // ELMO1 // DDX58 // AP1S2	0.000730421
GO:0001914	biological_process	regulation of T cell mediated cytotoxicity	8	PTPRC // PTPRC // IL7R // IL7R // IL7R // IL12RB1 // P2RX7 // P2RX7	0.000749692
GO:0022604	biological_process	regulation of cell morphogenesis	5	SPP1 // APOE // APOE // APOE // GNA13 // GNA13 // HCK // ITGB2 // CCL2 // EPB41L3 // DAB2 // DAB2 // DAB2 // DAB2 // GREM1 // CSF1R // CSF1R // FGR // FGR // LST1 // CORO1A // CORO1A // CORO1A // CORO1A // CCL7 // PDPN // HEXB // HEXB // HEXB // SCARF1 // TIAM1 // TIAM1 // COL1A1 // ARHGAP15 // RAP2A // NTN1 // GAS7 // GAS7 // GAS7 // GAS7 // GAS7 // GAS7 // GAS7 // EZH2 // ICAM1 // CCL13 // FGD6…	0.000749984
GO:0030811	biological_process	regulation of nucleotide catabolic process	8	GPR65 // STMN3 // STMN3 // RGS1 // RASGRP3 // RASGRP3 // RASGRP3 // RASGRP3 // RASGRP3 // RASGRP3 // CCL19 // PTPLAD1 // ARAP2 // ADAP2 // ADAP2 // ADAP2 // ADAP2 // TBC1D2 // DOCK4 // ARRB2 // ARRB2 // S1PR1 // CCR7 // DNAJC1 // RGS10 // NCKAP1L // ARHGAP15 // PPIF // PLSCR1 // GMIP // GIT2 // GIT2 // GIT2 // GIT2 // GIT2 // EZH2 // ASAP1 // ASAP1 // FGD6 // ECT2 // SIPA1 // RP2	0.000774357
GO:0001666	biological_process	response to hypoxia	5	HMOX1 // HMOX1 // CXCR4 // VCAM1 // CCL2 // CASP1 // UCP2 // UCP2 // ATP1B1 // ATP1B1 // IL18 // PAK1 // PAK1 // PAK1 // PAK1 // PAK1 // PAK1 // PAK1 // SOD2 // SOD2 // SOD2 // DPP4 // PLAT // PLAT // PLAT // IREB2 // IREB2 // PLAU // DDIT4 // ADM // ADM // THBS1 // MMP2 // MMP2 // MMP2 // ICAM1 // TGFB1 // PLOD1 // HIF1A	0.000807104
GO:0071260	biological_process	cellular response to mechanical stimulus	5	CASP1 // TLR7 // CYBA // IL18 // MAP3K1 // TLR4 // MAP3K2 // IL1B // COL1A1 // TLR5 // MYD88 // TLR8 // ATP1A1 // ATP1A1	0.000807104
GO:0009118	biological_process	regulation of nucleoside metabolic process	6	GPR65 // STMN3 // STMN3 // RGS1 // RASGRP3 // RASGRP3 // RASGRP3 // RASGRP3 // RASGRP3 // RASGRP3 // CCL19 // PTPLAD1 // ARAP2 // ADAP2 // ADAP2 // ADAP2 // ADAP2 // TBC1D2 // DOCK4 // ARRB2 // ARRB2 // S1PR1 // CCR7 // DNAJC1 // RGS10 // NCKAP1L // ARHGAP15 // PPIF // PLSCR1 // GMIP // GIT2 // GIT2 // GIT2 // GIT2 // GIT2 // EZH2 // ASAP1 // ASAP1 // FGD6 // ECT2 // SIPA1 // RP2	0.000874411
GO:0010035	biological_process	response to inorganic substance	3	S100A8 // S100A9 // HMOX1 // HMOX1 // HBB // FBP1 // UCP2 // UCP2 // HTR2B // CCL19 // CA2 // ALOX5AP // IL18 // FABP4 // AKR1C3 // SOD2 // SOD2 // SOD2 // AQP9 // CCR7 // CEBPA // IREB2 // IREB2 // TXNIP // TNFRSF11B // COL1A1 // THBS1 // CYBRD1 // PPIF // PPARG // PPARG // PPARG // PPARG // OLR1 // OLR1 // OLR1 // OLR1 // OLR1 // OLR1 // P2RX7 // P2RX7 // ICAM1 // TNFAIP3 // LCK // LCK // ECT2 …	0.000880647
GO:0045071	biological_process	negative regulation of viral genome replication	6	CCL5 // OAS1 // APOBEC3G // OAS3 // MX1 // ISG15 // PLSCR1 // APOBEC3C // IFI16 // IFITM1	0.000902479
GO:0010575	biological_process	positive regulation vascular endothelial growth factor production	6	C3AR1 // C3AR1 // IL1B // IL1B // IL1B // IL1B // HPSE // TGFB1 // HIF1A	0.000910433
GO:0070555	biological_process	response to interleukin-1	5	CHI3L1 // CCL5 // APOE // APOE // APOE // PYCARD // CCL2 // IL8 // IL8 // CYBA // SELE // IRAK3 // MYD88 // ICAM1 // HIF1A	0.000941136
GO:0010741	biological_process	negative regulation of intracellular protein kinase cascade	7	APOE // PYCARD // PTPN6 // PTPN6 // PTPN6 // PTPRJ // LYN // LYN // TLR4 // IL1B // IL1B // IL1B // IL1B // DDIT4 // CSK // CSK // CSK // CSK // IRAK3 // IGF1 // P2RX7 // P2RX7 // TNFAIP3 // IL10 // OTUD7B // DUSP4 // DUSP6 // DUSP6	0.000958917
GO:0043409	biological_process	negative regulation of MAPK cascade	8	APOE // PTPN6 // PTPN6 // PTPN6 // PTPRJ // LYN // LYN // TLR4 // IL1B // IL1B // IL1B // IL1B // CSK // CSK // CSK // CSK // IRAK3 // IGF1 // P2RX7 // P2RX7 // DUSP4 // DUSP6 // DUSP6	0.000961646
GO:0043087	biological_process	regulation of GTPase activity	11	GPR65 // STMN3 // STMN3 // RGS1 // RASGRP3 // RASGRP3 // RASGRP3 // RASGRP3 // RASGRP3 // RASGRP3 // CCL19 // PTPLAD1 // ARAP2 // ADAP2 // ADAP2 // ADAP2 // ADAP2 // TBC1D2 // DOCK4 // ARRB2 // ARRB2 // S1PR1 // CCR7 // RGS10 // NCKAP1L // ARHGAP15 // GMIP // GIT2 // GIT2 // GIT2 // GIT2 // GIT2 // EZH2 // ASAP1 // ASAP1 // FGD6 // ECT2 // SIPA1 // RP2	0.000973595
GO:0090066	biological_process	regulation of anatomical structure size	3	SPP1 // APOE // APOE // APOE // HBB // HCK // CAPG // PYCARD // HCLS1 // HTR2B // PLEK // MAP3K1 // IL7R // IL7R // IL7R // SOD2 // SOD2 // SOD2 // CORO1A // CORO1A // CORO1A // CORO1A // CCR7 // ARPC1B // ARPC1B // ARPC1B // ARPC1B // ARPC1B // ARPC1B // ARPC1B // ARPC1B // ARPC1B // GRB2 // GRB2 // GCH1 // P2RX4 // P2RX4 // NCKAP1L // ADRB2 // TMSB10 // CXCL12 // NTN1	0.000979667
GO:0001906	biological_process	cell killing	1	CTSH // CTSH // PTPN6 // PTPN6 // PTPN6 // HAMP // SLAMF7 // CTSC // CRTAM // CADM1 // S100A12 // STXBP2	0.000990243
GO:0043067	biological_process	regulation of programmed cell death	5	S100A8 // MMP9 // S100A9 // BCL2A1 // HMOX1 // HMOX1 // CCL5 // APOE // APOE // APOE // HCK // MNDA // CTSH // CTSH // PTPRC // PTPRC // PYCARD // CTSB // NCF2 // NCF2 // NCF2 // CCL2 // BID // HCLS1 // LGMN // FCER1G // CASP1 // CASP1 // CASP1 // CASP1 // LYN // LYN // TNFSF10 // CLEC5A // VNN1 // SRGN // HTR2B // TLR2 // IFI27 // SGK1 // C5AR1 // CSTB // DAB2 // DAB2 // DAB2 // DAB2 // CCL19 //…	0.00103771
GO:0001933	biological_process	negative regulation of protein phosphorylation	9	APOE // GMFG // SAMSN1 // SAMSN1 // PTPRC // PTPRC // PYCARD // PTPN6 // PTPN6 // PTPN6 // PTPRJ // LYN // LYN // MLLT1 // GREM1 // FABP4 // DNAJC3 // IL1B // IL1B // IL1B // IL1B // DDIT4 // IRAK3 // CDKN2A // CDKN2A // TNFAIP3 // TNFAIP3 // TNFAIP3 // TNFAIP3 // TGFB1 // DUSP4 // IGFBP3 // DUSP6 // DUSP6	0.00105475
GO:0042990	biological_process	regulation of transcription factor import into nucleus	9	CD36 // CD36 // CD36 // CD36 // CD36 // CD36 // CD36 // CD36 // HCLS1 // TLR2 // TLR7 // CCL19 // GREM1 // TLR4 // IL1B // IL10 // DDX58	0.00106201
GO:0007162	biological_process	negative regulation of cell adhesion	5	ADAMDEC1 // PTPRC // FXYD5 // ARHGDIB // IL1RN // MYO1F // LAMB1 // LAMB1 // COL1A1 // PODXL // THBS1 // CBLL1 // CBLL1 // SERPINE1 // LPXN // CDKN2A // TGFB1 // SIPA1	0.00106392
GO:0050706	biological_process	regulation of interleukin-1 beta secretion	10	PYCARD // CASP1 // CCL19 // CCR7 // CCR7 // CCR7 // P2RX7 // P2RX7	0.00106855
GO:0060768	biological_process	regulation of epithelial cell proliferation involved in prostate gland development	6	EAF2 // EAF2 // SERPINF1 // SERPINF1 // SERPINF1 // SERPINF1 // SERPINF1 // SERPINF1	0.00106855
GO:0032928	biological_process	regulation of superoxide anion generation	7	ACP5 // ACP5 // ACP5 // SYK // IL18 // TGFB1	0.00111383
GO:0045586	biological_process	regulation of gamma-delta T cell differentiation	9	PTPRC // PTPRC // SYK // NCKAP1L // LCK // LCK	0.00111383
GO:0045588	biological_process	positive regulation of gamma-delta T cell differentiation	10	PTPRC // PTPRC // SYK // NCKAP1L // LCK // LCK	0.00111383
GO:0006911	biological_process	phagocytosis, engulfment	7	ABCA1 // FCER1G // AIF1 // BIN2 // THBS1 // ELMO1	0.00111383
GO:0032612	biological_process	interleukin-1 production	4	ABCA1 // CASP1 // IL1B // IL1B // IL1B // IL1B	0.00111383
GO:0002604	biological_process	regulation of dendritic cell antigen processing and presentation	5	CCL19 // CCR7 // CCR7 // CCR7 // SLC11A1 // THBS1	0.00111383
GO:0048525	biological_process	negative regulation of viral reproduction	5	CCL5 // OAS1 // APOBEC3G // OAS3 // MX1 // ISG15 // PLSCR1 // APOBEC3C // IFI16 // IFITM1	0.00114751
GO:0060324	biological_process	face development	4	ALDH1A3 // ITGA4 // ITGA4 // COL1A1 // PDGFRA // PDGFRA // PDGFRA // PDGFRA // MMP2 // MMP2 // MMP2 // TGFB1	0.00119623
GO:0034367	biological_process	macromolecular complex remodeling	4	APOC1 // PLA2G7 // APOE // APOE // APOE // LPL // ABCG1 // SCARB1 // APOC2	0.00120317
GO:0034368	biological_process	protein-lipid complex remodeling	5	APOC1 // PLA2G7 // APOE // APOE // APOE // LPL // ABCG1 // SCARB1 // APOC2	0.00120317
GO:0034369	biological_process	plasma lipoprotein particle remodeling	6	APOC1 // PLA2G7 // APOE // APOE // APOE // LPL // ABCG1 // SCARB1 // APOC2	0.00120317
GO:0034599	biological_process	cellular response to oxidative stress	5	CD36 // CD36 // CD36 // CD36 // CD36 // CD36 // CD36 // CD36 // HMOX1 // HMOX1 // HBB // IL18 // AKR1C3 // SOD2 // SOD2 // SOD2 // PPIF // TNFAIP3 // ECT2 // CDK1 // HIF1A // HIF1A	0.00128161
GO:0010941	biological_process	regulation of cell death	4	S100A8 // MMP9 // S100A9 // BCL2A1 // HMOX1 // HMOX1 // CCL5 // APOE // APOE // APOE // HBB // HCK // MNDA // CTSH // CTSH // PTPRC // PTPRC // PYCARD // CTSB // NCF2 // NCF2 // NCF2 // CCL2 // BID // HCLS1 // LGMN // FCER1G // CASP1 // CASP1 // CASP1 // CASP1 // LYN // LYN // TNFSF10 // CLEC5A // VNN1 // SRGN // HTR2B // TLR2 // IFI27 // SGK1 // C5AR1 // CSTB // DAB2 // DAB2 // DAB2 // DAB2 // C…	0.00135439
GO:0033124	biological_process	regulation of GTP catabolic process	10	GPR65 // STMN3 // STMN3 // RGS1 // RASGRP3 // RASGRP3 // RASGRP3 // RASGRP3 // RASGRP3 // RASGRP3 // CCL19 // PTPLAD1 // ARAP2 // ADAP2 // ADAP2 // ADAP2 // ADAP2 // TBC1D2 // DOCK4 // ARRB2 // ARRB2 // S1PR1 // CCR7 // RGS10 // NCKAP1L // ARHGAP15 // GMIP // GIT2 // GIT2 // GIT2 // GIT2 // GIT2 // EZH2 // ASAP1 // ASAP1 // FGD6 // ECT2 // SIPA1 // RP2	0.0013919
GO:0042306	biological_process	regulation of protein import into nucleus	8	CD36 // CD36 // CD36 // CD36 // CD36 // CD36 // CD36 // CD36 // HCLS1 // TLR2 // TLR7 // DAB2 // CCL19 // GREM1 // TLR4 // IL1B // IGF1 // TGFBR1 // IL10 // TGFB1 // ECT2 // ECT2 // ECT2 // DDX58 // CDK1	0.0014403
GO:0042981	biological_process	regulation of apoptotic process	6	S100A8 // MMP9 // S100A9 // BCL2A1 // HMOX1 // HMOX1 // CCL5 // APOE // APOE // APOE // HCK // MNDA // CTSH // CTSH // PTPRC // PTPRC // PYCARD // CTSB // NCF2 // NCF2 // NCF2 // CCL2 // BID // HCLS1 // LGMN // FCER1G // CASP1 // CASP1 // CASP1 // CASP1 // LYN // LYN // TNFSF10 // CLEC5A // VNN1 // SRGN // HTR2B // TLR2 // IFI27 // SGK1 // C5AR1 // CSTB // DAB2 // DAB2 // DAB2 // DAB2 // CCL19 //…	0.00144696
GO:0006478	biological_process	peptidyl-tyrosine sulfation	9	TPST2 // TPST2 // TPST2 // TPST2 // TPST2	0.00144696
GO:0009138	biological_process	pyrimidine nucleoside diphosphate metabolic process	8	DTYMK // DTYMK // DTYMK // DTYMK // DTYMK	0.00144696
GO:0009189	biological_process	deoxyribonucleoside diphosphate biosynthetic process	9	DTYMK // DTYMK // DTYMK // DTYMK // DTYMK	0.00144696
GO:0045429	biological_process	positive regulation of nitric oxide biosynthetic process	7	HBB // TLR2 // SOD2 // SOD2 // SOD2 // TLR4 // IL1B // P2RX4 // PTX3 // ICAM1	0.00145522
GO:0050856	biological_process	regulation of T cell receptor signaling pathway	7	PTPN6 // PTPN6 // PTPN6 // PTPRJ // CCR7 // CCR7 // CCR7 // LCK // LCK // PTPN22	0.00145522
GO:0002823	biological_process	negative regulation of adaptive immune response based on somatic recombination of immune receptors built from immunoglobulin superfamily domains	7	PTPRC // PTPRC // PTPN6 // PTPN6 // PTPN6 // IL7R // IL7R // IL7R	0.00148143
GO:0001562	biological_process	response to protozoan	4	IRF8 // IRF8 // IRF8 // IRF8 // IRF8 // IRF8 // SLC11A1 // BATF	0.00148143
GO:0048873	biological_process	homeostasis of number of cells within a tissue	6	LIPA // LIPA // LIPA // CORO1A // CORO1A // CORO1A // CORO1A // SASH3 // P2RX7 // P2RX7 // F2R	0.00151153
GO:0006915	biological_process	apoptotic process	5	S100A8 // S100A9 // BCL2A1 // HMOX1 // HMOX1 // CD14 // GPR65 // CXCR4 // PYCARD // ITGB2 // BID // PTPN6 // TNFRSF21 // CASP1 // CASP1 // CASP1 // CASP1 // LYN // TNFSF10 // SRGN // IFI27 // SGK1 // C5AR1 // DAB2 // CXCR2 // CXCR2 // CXCR2 // CXCR2 // CXCR2 // GZMA // GREM1 // OSM // OSM // MAP3K1 // PAK1 // GZMH // XIAP // GZMB // VAV1 // LY86 // HK2 // HK2 // ARHGEF3 // SOD2 // SOD2 // SOD2 //…	0.00151187
GO:0031100	biological_process	organ regeneration	7	LCP1 // LCP1 // LCP1 // CCL2 // C5AR1 // CEBPA // ADM // ADM // PPARG // PPARG // PPARG // PPARG // TGFB1 // CDK1	0.00151622
GO:0061298	biological_process	retina vasculature development in camera-type eye	10	CYP1B1 // PDGFRA // PDGFRA // PDGFRA // PDGFRA // HIF1A // HIF1A	0.00154322
GO:0030866	biological_process	cortical actin cytoskeleton organization	6	EPB41L3 // EPB41L3 // EPB41L3 // EPB41L3 // PLEK // NCKAP1L // EPB41 // EPB41 // FMNL1	0.00157176
GO:0006692	biological_process	prostanoid metabolic process	10	TBXAS1 // AKR1C3 // PDPN // PDPN // PTGS1 // HPGDS // HPGD // MIF // AKR1C2	0.00157176
GO:0006693	biological_process	prostaglandin metabolic process	11	TBXAS1 // AKR1C3 // PDPN // PDPN // PTGS1 // HPGDS // HPGD // MIF // AKR1C2	0.00157176
GO:0032846	biological_process	positive regulation of homeostatic process	4	SPP1 // SYK // CA2 // NR1H3 // IL1B // IL1B // IL1B // IL1B // P2RX4 // TFRC // TFRC // TFRC // P2RX7 // P2RX7 // F2R	0.00166016
GO:0071695	biological_process	anatomical structure maturation	4	MREG // MREG // MREG // MREG // MYO5A // LYL1 // CDH5 // CDH5 // CDH5 // CDH5 // CDH5 // IGF1 // MMP2 // MMP2 // MMP2	0.00166016
GO:0009725	biological_process	response to hormone stimulus	4	SPP1 // CTSS // HMOX1 // HMOX1 // APOE // APOE // APOE // CTSH // CTSH // CTSB // NCF2 // NCF2 // NCF2 // CCL2 // BID // PTPN6 // HCLS1 // ABCG1 // LYN // LYN // UCP2 // UCP2 // CCL19 // CA2 // ATP6V1F // IL18 // PAK1 // PAK1 // PAK1 // PAK1 // PAK1 // PAK1 // PAK1 // MYO5A // NR1H3 // AKR1C3 // IL1RN // CTSL1 // CCR7 // PLAT // PLAT // PLAT // MLL2 // CEBPA // GRB2 // NPC1 // TXNIP // PTGER2 // …	0.00175767
GO:0010574	biological_process	regulation of vascular endothelial growth factor production	5	C3AR1 // C3AR1 // CCL2 // IL1B // IL1B // IL1B // IL1B // HPSE // TGFB1 // CCR2 // HIF1A	0.00184998
GO:0032570	biological_process	response to progesterone stimulus	6	NCF2 // NCF2 // NCF2 // CCL2 // NR1H3 // TXNIP // THBS1 // OXTR // OXTR // OXTR // TGFB1	0.00184998
GO:0042542	biological_process	response to hydrogen peroxide	5	HMOX1 // HMOX1 // HBB // IL18 // SOD2 // SOD2 // SOD2 // TXNIP // COL1A1 // PPIF // OLR1 // OLR1 // OLR1 // OLR1 // OLR1 // OLR1 // TNFAIP3 // LCK // LCK // ECT2 // CDK1	0.00188289
GO:0002579	biological_process	positive regulation of antigen processing and presentation	5	PYCARD // CCL19 // CCR7 // CCR7 // CCR7 // SLC11A1	0.00188552
GO:0001771	biological_process	immunological synapse formation	6	DOCK2 // DOCK2 // CCL19 // CCR7 // CCR7 // CCR7	0.00188552
GO:0002863	biological_process	positive regulation of inflammatory response to antigenic stimulus	8	FCER1G // FCER1A // CCR7 // CCR7 // CCR7 // CD28	0.00188552
GO:0050665	biological_process	hydrogen peroxide biosynthetic process	5	CYBA // SOD2 // SOD2 // SOD2 // CYBB // CYBB	0.00188552
GO:0012501	biological_process	programmed cell death	4	S100A8 // S100A9 // BCL2A1 // HMOX1 // HMOX1 // CD14 // GPR65 // CXCR4 // PYCARD // ITGB2 // BID // PTPN6 // TNFRSF21 // CASP1 // CASP1 // CASP1 // CASP1 // LYN // TNFSF10 // SRGN // IFI27 // SGK1 // C5AR1 // DAB2 // CXCR2 // CXCR2 // CXCR2 // CXCR2 // CXCR2 // GZMA // GREM1 // OSM // OSM // MAP3K1 // PAK1 // GZMH // XIAP // GZMB // VAV1 // LY86 // HK2 // HK2 // ARHGEF3 // SOD2 // SOD2 // SOD2 //…	0.00195183
GO:0050704	biological_process	regulation of interleukin-1 secretion	9	PYCARD // CASP1 // CCL19 // CCR7 // CCR7 // CCR7 // P2RX7 // P2RX7	0.00202177
GO:0006468	biological_process	protein phosphorylation	7	CCL5 // GMFG // HCK // CXCR4 // PTPRC // PTPRC // CCL2 // PTPN6 // SYK // CCL8 // LYN // LYN // TLR2 // TLR7 // SGK1 // C5AR1 // DAB2 // DAB2 // DAB2 // DAB2 // CCL19 // FYB // OSM // OSM // MAP3K1 // PAK1 // PAK1 // PAK1 // PAK1 // PAK1 // PAK1 // PAK1 // PTPLAD1 // CSF1R // CSF1R // FCER1A // FGR // FGR // TLR4 // MAPK13 // STK4 // STK17B // STK17B // SMG1 // FPR1 // PRKCH // MAP3K2 // IL1B // …	0.00204049
GO:0030574	biological_process	collagen catabolic process	6	MMP12 // MMP9 // MMP1 // MMP7 // CTSB // CTSD // CTSL1 // CTSK // COL1A1 // COL11A1 // MMP2 // MMP2 // MMP2 // MMP8	0.00204351
GO:0030858	biological_process	positive regulation of epithelial cell differentiation	6	PRKCH // PRKCH // PRKCH // PRKCH // PRKCH // PRKCH // PRKCH // PRKCH // PRKCH // PRKCH // PRKCH // PRKCH // CYP27B1	0.00210892
GO:0006811	biological_process	ion transport	5	CD36 // CCL5 // CP // CP // CP // CP // CP // HBB // PTPRC // PTPRC // CCR5 // STEAP4 // CCR1 // SYK // FCER1G // CCL8 // SLC16A3 // LYN // LYN // UCP2 // SLC31A2 // HTR2B // SGK1 // ATP1B1 // ATP1B1 // CCL19 // PLIN2 // PLIN2 // CA2 // ATP6V1F // FCER1A // PLCG2 // PLCG2 // SLC39A9 // FOLR2 // CORO1A // CORO1A // CORO1A // CORO1A // AQP9 // AQP9 // SLC31A1 // SLC38A6 // CCR7 // PDPN // SLC7A7 //…	0.00211744
GO:0051248	biological_process	negative regulation of protein metabolic process	6	APOE // GMFG // SAMSN1 // SAMSN1 // PTPRC // PTPRC // PYCARD // TIMP2 // TIMP2 // PTPN6 // PTPN6 // PTPN6 // PTPRJ // LYN // LYN // MLLT1 // GREM1 // FABP4 // CR1 // DNAJC3 // NR1H3 // NR1H3 // NR1H3 // NR1H3 // NR1H3 // NR1H3 // NR1H3 // NR1H3 // ARRB2 // ARRB2 // PLAT // DNAJC1 // SPI1 // PSMB8 // PSMB10 // IL1B // IL1B // IL1B // IL1B // DDIT4 // PSMB9 // ISG15 // IRAK3 // THBS1 // TIMP1 // SE…	0.0022059
GO:0016525	biological_process	negative regulation of angiogenesis	7	CCL2 // CX3CR1 // CX3CR1 // CX3CR1 // STAB1 // THBS2 // THBS2 // CXCL10 // HHEX // HHEX // THBS1 // THBS1 // SERPINE1 // SERPINF1 // PF4 // CCR2	0.00223552
GO:0071347	biological_process	cellular response to interleukin-1	7	CCL5 // APOE // APOE // APOE // PYCARD // CCL2 // IL8 // IL8 // IRAK3 // ICAM1 // HIF1A	0.00224129
GO:0032653	biological_process	regulation of interleukin-10 production	5	PYCARD // HLA-DRB1 // HLA-DRB1 // HLA-DRB1 // HLA-DRB1 // HLA-DRB1 // FCER1G // TLR4 // SASH3 // CD83 // JAK3	0.00224129
GO:1901652	biological_process	response to peptide	5	APOE // APOE // APOE // PTPN6 // LYN // LYN // UCP2 // UCP2 // ATP6V1F // IL18 // PAK1 // PAK1 // PAK1 // PAK1 // PAK1 // PAK1 // PAK1 // MYO5A // PLAT // PLAT // PLAT // GRB2 // IGFBP1 // COL1A1 // CSK // CSK // CSK // CSK // ADM // ADM // HHEX // HHEX // ATP6V1A // ATP6V1B2 // PPARG // TIMP1 // TIMP1 // EGR2 // OXTR // OXTR // OXTR // RAB31 // TNFAIP3 // TNFAIP3 // TNFAIP3 // TNFAIP3 // JAK3 //…	0.00224345
GO:0001773	biological_process	myeloid dendritic cell activation	6	PYCARD // DOCK2 // DOCK2 // SPI1 // BATF // UBD // TGFB1	0.00225339
GO:0050829	biological_process	defense response to Gram-negative bacterium	6	PYCARD // MMP7 // TLR4 // SLC11A1 // CD4 // CD4 // SERPINE1	0.00225339
GO:0035774	biological_process	positive regulation of insulin secretion involved in cellular response to glucose stimulus	10	HLA-DRB1 // HLA-DRB1 // HLA-DRB1 // HLA-DRB1 // HLA-DRB1 // HIF1A // HIF1A	0.00225339
GO:0006812	biological_process	cation transport	6	CCL5 // CP // CP // CP // CP // CP // PTPRC // PTPRC // CCR5 // CCR1 // SYK // FCER1G // CCL8 // LYN // LYN // UCP2 // SLC31A2 // HTR2B // SGK1 // ATP1B1 // CCL19 // ATP6V1F // FCER1A // PLCG2 // PLCG2 // SLC39A9 // CORO1A // CORO1A // CORO1A // CORO1A // SLC31A1 // SLC38A6 // CCR7 // IREB2 // SCO2 // TCN2 // SLC12A8 // CYP27B1 // CYP27B1 // SLC22A18 // SLC11A1 // P2RX4 // P2RX4 // ATP6V1A // ATP…	0.00232332
GO:0048523	biological_process	negative regulation of cellular process	4	SPP1 // APOC1 // IFI30 // BCL2A1 // ACP5 // ACP5 // ACP5 // CD36 // CD36 // CD36 // CD36 // CD36 // CD36 // CD36 // CD36 // HMOX1 // HMOX1 // ADAMDEC1 // CCL5 // APOE // APOE // APOE // GMFG // SAMSN1 // SAMSN1 // HCK // STMN3 // STMN3 // TMEM176B // MNDA // CTSH // CTSH // PTPRC // PTPRC // RGS1 // CAPG // LILRB2 // PYCARD // HLA-DRB1 // HLA-DRB1 // HLA-DRB1 // HLA-DRB1 // HLA-DRB1 // CCR5 // LI…	0.00244051
GO:0048844	biological_process	artery morphogenesis	10	APOE // APOE // APOE // ZMIZ1 // HPGD // HPGD // HPGD // TGFBR1 // TGFBR1 // TGFBR1 // PRRX1 // PRRX1 // PRRX1	0.00245682
GO:0014823	biological_process	response to activity	2	NCF2 // NCF2 // NCF2 // CCL2 // SOD2 // SOD2 // SOD2 // SCO2 // SCO2 // IL10 // CDK1 // HIF1A // HIF1A	0.00245682
GO:0031401	biological_process	positive regulation of protein modification process	8	CHI3L1 // CD36 // CD36 // CD36 // CD36 // CD36 // CD36 // CD36 // CD36 // CCL5 // CXCR4 // PTPRC // PTPRC // CCL2 // HCLS1 // SYK // LYN // LYN // IL8 // HTR2B // C5AR1 // DAB2 // DAB2 // DAB2 // DAB2 // CCL19 // GREM1 // OSM // MAP3K1 // PAK1 // PTPLAD1 // CSF1R // CSF1R // FCER1A // DNAJC3 // TLR4 // IL1RN // ARRB2 // ARRB2 // STK4 // CCR7 // FPR1 // PSMB8 // MAP3K2 // PSMB10 // IL1B // IGFBP1 …	0.00249924
GO:0016052	biological_process	carbohydrate catabolic process	4	CHIT1 // HK2 // HK2 // PGD // PGD // PGD // PGD // PGD // PGD // PGD // PGD // HK3 // HK3 // HEXB // HEXB // HEXB // TALDO1 // TALDO1 // AKR1A1 // AKR1A1 // PKM2 // GLB1 // GLB1 // GLB1 // PYGL // GAA // GAA // GAA	0.00253229
GO:0002889	biological_process	regulation of immunoglobulin mediated immune response	8	PTPRC // PTPRC // PTPN6 // PTPN6 // PTPN6 // FCER1G // FCER1A // CR1 // CD28 // IL10 // TGFB1	0.00268522
GO:0002861	biological_process	regulation of inflammatory response to antigenic stimulus	7	HLA-DRB1 // FCER1G // FCER1A // CCR7 // CCR7 // CCR7 // CD28 // IL10	0.00268522
GO:0042402	biological_process	cellular biogenic amine catabolic process	7	KYNU // KYNU // KYNU // KMO // SAT1 // TDO2 // TDO2 // TDO2	0.00268522
GO:2000193	biological_process	positive regulation of fatty acid transport	8	IL1B // IL1B // IL1B // IL1B // P2RX4 // MIF // P2RX7 // P2RX7	0.00268522
GO:0033077	biological_process	T cell differentiation in thymus	11	PTPRC // PTPRC // DOCK2 // DOCK2 // HLA-DMA // HLA-DMA // CD3D // CCR7 // CCR7 // CCR7 // CD28 // BCL11B // XRCC4 // FZD8	0.00269224
GO:0042493	biological_process	response to drug	3	LPL // LPL // LPL // LPL // MMP7 // NCF2 // NCF2 // NCF2 // CCL2 // TIMP2 // TIMP2 // FBP1 // LYN // LYN // HTR2B // TLR2 // CYBA // PLIN2 // PLIN2 // SOD2 // SOD2 // SOD2 // IL1RN // NPC1 // TXNIP // TNFRSF11B // APOC2 // IL1B // SLC1A3 // SLC1A3 // SLC1A3 // SLC22A18 // NCKAP1L // THBS1 // PNP // PPARG // PPARG // PPARG // PPARG // CD69 // CD69 // CYP2C19 // P2RX7 // P2RX7 // ICAM1 // OXTR // O…	0.00271138
GO:0046578	biological_process	regulation of Ras protein signal transduction	7	APOE // GPR65 // STMN3 // STMN3 // ABCA1 // TIMP2 // TIMP2 // FBP1 // RASGRP3 // CCL19 // ARAP2 // ADAP2 // ADAP2 // ADAP2 // ADAP2 // VAV1 // VAV1 // VAV1 // VAV1 // TBC1D2 // ARHGEF3 // ARHGEF3 // ARHGEF3 // ARHGEF3 // ARHGEF3 // ARHGEF3 // ARHGEF3 // DOCK4 // S1PR1 // CCR7 // TIAM1 // TIAM1 // NCKAP1L // ARHGAP15 // GMIP // GIT2 // GIT2 // GIT2 // GIT2 // GIT2 // IGF1 // EZH2 // ASAP1 // ASAP1…	0.00276977
GO:2000106	biological_process	regulation of leukocyte apoptotic process	7	CCL5 // HCLS1 // LYN // LYN // CCL19 // CCR7 // CXCL12 // CDKN2A // MIF // JAK3 // IL10 // BTK	0.00286168
GO:0034372	biological_process	very-low-density lipoprotein particle remodeling	8	APOE // APOE // APOE // LPL // APOC2	0.0028884
GO:0002866	biological_process	positive regulation of acute inflammatory response to antigenic stimulus	9	FCER1G // FCER1A // CCR7 // CCR7 // CCR7	0.0028884
GO:1900180	biological_process	regulation of protein localization to nucleus	5	CD36 // CD36 // CD36 // CD36 // CD36 // CD36 // CD36 // CD36 // HCLS1 // TLR2 // TLR7 // DAB2 // CCL19 // GREM1 // TLR4 // IL1B // IGF1 // TGFBR1 // IL10 // TGFB1 // ECT2 // ECT2 // ECT2 // DDX58 // CDK1	0.00294242
GO:0002544	biological_process	chronic inflammatory response	5	S100A8 // S100A9 // VCAM1 // VNN1 // IL1RN // THBS1	0.00298455
GO:0010758	biological_process	regulation of macrophage chemotaxis	9	CCL5 // C3AR1 // C3AR1 // CCL2 // PTPRJ // THBS1	0.00298455
GO:0046643	biological_process	regulation of gamma-delta T cell activation	8	PTPRC // PTPRC // SYK // NCKAP1L // LCK // LCK	0.00298455
GO:0046645	biological_process	positive regulation of gamma-delta T cell activation	9	PTPRC // PTPRC // SYK // NCKAP1L // LCK // LCK	0.00298455
GO:0010324	biological_process	membrane invagination	5	ABCA1 // FCER1G // AIF1 // BIN2 // THBS1 // ELMO1	0.00298455
GO:0050688	biological_process	regulation of defense response to virus	6	HCK // DOCK2 // APOBEC3G // BIRC3 // CD28 // PACS1 // CD4 // IL12RB1 // MICB // TNFAIP3 // LCK // ELMO1 // DDX58 // AP1S2	0.00308854
GO:0045073	biological_process	regulation of chemokine biosynthetic process	7	HMOX1 // IL1B // IL1B // IL1B // IL1B // MYD88 // MYD88	0.00316967
GO:0050857	biological_process	positive regulation of antigen receptor-mediated signaling pathway	7	PTPRC // PTPRC // CCR7 // CCR7 // CCR7 // PRKCH // LCK	0.00316967
GO:0032757	biological_process	positive regulation of interleukin-8 production	6	TLR2 // TLR7 // IL18 // TLR4 // IL1B // TLR5 // SERPINE1	0.00316967
GO:0071285	biological_process	cellular response to lithium ion	7	FABP4 // CEBPA // PPARG // PPARG // PPARG // PPARG // XRCC4	0.00316967
GO:0051923	biological_process	sulfation	4	SULT1A1 // SULT1C2 // TPST2 // TPST2 // TPST2 // TPST2 // TPST2	0.00316967
GO:0032535	biological_process	regulation of cellular component size	4	SPP1 // APOE // APOE // APOE // HCK // CAPG // PYCARD // HCLS1 // PLEK // MAP3K1 // IL7R // IL7R // IL7R // CORO1A // CORO1A // CORO1A // CORO1A // CCR7 // ARPC1B // ARPC1B // ARPC1B // ARPC1B // ARPC1B // ARPC1B // ARPC1B // ARPC1B // ARPC1B // GRB2 // GRB2 // NCKAP1L // TMSB10 // CXCL12 // NTN1	0.00318632
GO:0030865	biological_process	cortical cytoskeleton organization	5	EPB41L3 // EPB41L3 // EPB41L3 // EPB41L3 // PLEK // NCKAP1L // EPB41 // EPB41 // FMNL1	0.00328215
GO:0019835	biological_process	cytolysis	4	LYZ // GZMA // GZMH // GZMB // P2RX7 // P2RX7 // MICB // MMD	0.0035473
GO:0032271	biological_process	regulation of protein polymerization	6	HCK // CAPG // PYCARD // HCLS1 // MAP3K1 // CORO1A // CORO1A // CORO1A // CORO1A // CCR7 // ARPC1B // ARPC1B // ARPC1B // ARPC1B // ARPC1B // ARPC1B // ARPC1B // ARPC1B // ARPC1B // GRB2 // GRB2 // NCKAP1L // TMSB10	0.00358363
GO:0018108	biological_process	peptidyl-tyrosine phosphorylation	9	HCK // PTPN6 // SYK // LYN // LYN // OSM // OSM // CSF1R // CSF1R // FGR // FGR // FLT1 // ABL2 // PDGFRA // JAK3 // LCK // LCK // F2R // BTK	0.00365425
GO:0046777	biological_process	protein autophosphorylation	8	HCK // SYK // LYN // LYN // PAK1 // PAK1 // PAK1 // PAK1 // PAK1 // PAK1 // PAK1 // CSF1R // CSF1R // FGR // STK4 // STK17B // STK17B // SMG1 // FLT1 // CSK // CSK // CSK // CSK // PRKX // PDGFRA // IRAK3 // LCK // LCK // STK10	0.00376147
GO:0002705	biological_process	positive regulation of leukocyte mediated immunity	6	PTPRC // PTPRC // FCER1G // FCER1A // SASH3 // IL1B // CRTAM // IL12RB1 // P2RX7 // P2RX7 // CADM1 // CADM1 // CADM1	0.00382358
GO:0002708	biological_process	positive regulation of lymphocyte mediated immunity	7	PTPRC // PTPRC // FCER1G // FCER1A // SASH3 // IL1B // CRTAM // IL12RB1 // P2RX7 // P2RX7 // CADM1 // CADM1 // CADM1	0.00382358
GO:0000003	biological_process	reproduction	1	SPP1 // MMP9 // HCK // CXCR4 // CTSH // CTSH // MMP1 // ANPEP // FCGR2B // VCAM1 // CCR5 // CCL2 // SYK // PILRA // LYN // CLEC5A // CD86 // HLA-B // HLA-B // HLA-B // HLA-B // HLA-B // HLA-B // HLA-B // HLA-B // HLA-B // HLA-B // HLA-B // HLA-B // HLA-B // HLA-B // HLA-B // HLA-B // HLA-B // HLA-B // HLA-B // HLA-B // HLA-B // HLA-B // HLA-B // HLA-B // HLA-B // HLA-B // HLA-B // HLA-B // HLA-B …	0.00388272
GO:0009653	biological_process	anatomical structure morphogenesis	3	MMP12 // ACP5 // ACP5 // ACP5 // HMOX1 // HMOX1 // TYROBP // APOE // APOE // APOE // GNA13 // GNA13 // CXCR4 // TMEM176B // CTSH // CTSH // PTPRC // CPM // ANPEP // SNX10 // LCP1 // LCP1 // LCP1 // VCAM1 // ITGAX // CCL2 // PTPRJ // LIPA // LIPA // LIPA // SYK // CTSZ // EPB41L3 // IL8 // HTR2B // C5AR1 // DAB2 // DAB2 // DAB2 // DAB2 // CA2 // RAC2 // GREM1 // IL18 // CHST11 // CHST11 // PAK1 //…	0.00399028
GO:0048871	biological_process	multicellular organismal homeostasis	4	ACP5 // ACP5 // ACP5 // CTSH // LIPA // LIPA // LIPA // RAC2 // RAC2 // RAC2 // TLR4 // CORO1A // CORO1A // CORO1A // CORO1A // SASH3 // CTSK // IL1B // SLC11A1 // P2RX4 // ADRB2 // P2RX7 // P2RX7 // F2R // TPP1	0.00399915
GO:0034142	biological_process	toll-like receptor 4 signaling pathway	12	CD36 // CD14 // LY96 // ITGB2 // ITGAM // TLR2 // MAP3K1 // TLR4 // BIRC3 // RPS6KA1 // MYD88 // MAPKAPK3 // CDK1 // DUSP4 // DUSP6 // BTK	0.0040194
GO:0042088	biological_process	T-helper 1 type immune response	5	HLA-DRB1 // HLA-DRB1 // HLA-DRB1 // HLA-DRB1 // HLA-DRB1 // TLR1 // TLR1 // IL18 // TLR4	0.00415152
GO:0042311	biological_process	vasodilation	7	APOE // APOE // APOE // SOD2 // SOD2 // SOD2 // GCH1 // P2RX4 // P2RX4 // ADRB2	0.00416777
GO:0032677	biological_process	regulation of interleukin-8 production	5	PYCARD // TLR2 // TLR7 // IL18 // TLR4 // IL1B // TLR5 // SERPINE1 // TLR8 // F2R	0.00416777
GO:0044724	biological_process	single-organism carbohydrate catabolic process	5	HK2 // HK2 // PGD // PGD // PGD // PGD // PGD // PGD // PGD // PGD // HK3 // HK3 // HEXB // HEXB // HEXB // TALDO1 // TALDO1 // AKR1A1 // AKR1A1 // PKM2 // GLB1 // GLB1 // GLB1 // PYGL // GAA // GAA // GAA	0.00422521
GO:0006690	biological_process	icosanoid metabolic process	7	SYK // DPEP2 // ALOX5AP // FCER1A // TBXAS1 // ALOX5 // AKR1C3 // PDPN // PDPN // PTGS1 // CYP1B1 // HPGDS // HPGD // MIF // CYP2C19 // AKR1C2 // LTC4S	0.00427389
GO:1901568	biological_process	fatty acid derivative metabolic process	3	SYK // DPEP2 // ALOX5AP // FCER1A // TBXAS1 // ALOX5 // AKR1C3 // PDPN // PDPN // PTGS1 // CYP1B1 // HPGDS // HPGD // MIF // CYP2C19 // AKR1C2 // LTC4S	0.00427389
GO:0060249	biological_process	anatomical structure homeostasis	4	ACP5 // ACP5 // ACP5 // CTSH // LIPA // LIPA // LIPA // RAC2 // RAC2 // RAC2 // TLR4 // CORO1A // CORO1A // CORO1A // CORO1A // SASH3 // CTSK // P2RX4 // ADRB2 // P2RX7 // P2RX7 // RPA3 // F2R // GAA // GAA // GAA // TPP1 // HIF1A // HIF1A	0.00428615
GO:0006569	biological_process	tryptophan catabolic process	10	KYNU // KYNU // KYNU // KMO // TDO2 // TDO2 // TDO2	0.00442099
GO:0042436	biological_process	indole-containing compound catabolic process	5	KYNU // KYNU // KYNU // KMO // TDO2 // TDO2 // TDO2	0.00442099
GO:0046218	biological_process	indolalkylamine catabolic process	8	KYNU // KYNU // KYNU // KMO // TDO2 // TDO2 // TDO2	0.00442099
GO:0032663	biological_process	regulation of interleukin-2 production	5	VSIG4 // CD86 // SASH3 // CD83 // CD28 // CD28 // IL1B // CD80 // CD4 // TNFAIP3 // CCR2	0.00457491
GO:0097066	biological_process	response to thyroid hormone stimulus	5	CTSS // CTSH // CTSH // CTSB // CTSL1 // LMO2	0.00458033
GO:0002281	biological_process	macrophage activation involved in immune response	7	TYROBP // SYK // TLR7 // CX3CR1 // CX3CR1 // CX3CR1	0.00458033
GO:0002923	biological_process	regulation of humoral immune response mediated by circulating immunoglobulin	9	PTPRC // PTPRC // PTPN6 // PTPN6 // PTPN6 // CR1	0.00458033
GO:0022617	biological_process	extracellular matrix disassembly	5	MMP12 // MMP9 // MMP1 // MMP7 // CTSB // TIMP2 // CTSD // CTSL1 // CTSK // COL1A1 // TIMP1 // COL11A1 // MMP2 // MMP8	0.00460674
GO:0001960	biological_process	negative regulation of cytokine-mediated signaling pathway	7	CCL5 // PTPRC // PTPRC // NR1H3 // IL1RN // IRAK3 // PPARG // ECM1	0.00460674
GO:0050690	biological_process	regulation of defense response to virus by virus	7	HCK // DOCK2 // CD28 // PACS1 // CD4 // LCK // ELMO1 // AP1S2	0.00460674
GO:0038123	biological_process	toll-like receptor TLR1:TLR2 signaling pathway	12	CD36 // CD14 // LY96 // TLR2 // MAP3K1 // TLR4 // RPS6KA1 // MYD88 // MAPKAPK3 // CDK1 // DUSP4 // DUSP6 // BTK	0.00507653
GO:0038124	biological_process	toll-like receptor TLR6:TLR2 signaling pathway	12	CD36 // CD14 // LY96 // TLR2 // MAP3K1 // TLR4 // RPS6KA1 // MYD88 // MAPKAPK3 // CDK1 // DUSP4 // DUSP6 // BTK	0.00507653
GO:0001912	biological_process	positive regulation of leukocyte mediated cytotoxicity	6	PTPRC // PTPRC // CRTAM // IL12RB1 // P2RX7 // P2RX7 // CADM1 // CADM1 // CADM1	0.00517227
GO:0031329	biological_process	regulation of cellular catabolic process	5	APOC1 // APOE // GPR65 // STMN3 // STMN3 // RGS1 // FBP1 // RASGRP3 // RASGRP3 // RASGRP3 // RASGRP3 // RASGRP3 // RASGRP3 // HTR2B // DAB2 // CCL19 // PTPLAD1 // ARAP2 // ADAP2 // ADAP2 // ADAP2 // ADAP2 // TBC1D2 // DOCK4 // ARRB2 // ARRB2 // SCARB1 // TNFRSF1B // S1PR1 // CCR7 // DNAJC1 // NPC1 // RGS10 // APOC2 // IL1B // DDIT4 // ABL2 // NCKAP1L // ARHGAP15 // PPIF // PLSCR1 // GMIP // IFI16…	0.00521228
GO:0002440	biological_process	production of molecular mediator of immune response	2	HLA-DQB1 // PTPRC // MMP7 // HLA-DRB1 // HLA-DRB1 // HLA-DRB1 // HLA-DRB1 // HLA-DRB1 // HLA-DRB1 // IL7R // IL7R // IL7R // SLC11A1 // BATF // XRCC4	0.00521228
GO:0060137	biological_process	maternal process involved in parturition	5	CCL2 // OXTR // OXTR // OXTR // CD55	0.00521228
GO:0032645	biological_process	regulation of granulocyte macrophage colony-stimulating factor production	5	SYK // IL18 // FCER1A // IL1B // CD80	0.00521228
GO:0002883	biological_process	regulation of hypersensitivity	9	FCER1G // FCER1A // CCR7 // CCR7 // CCR7	0.00521228
GO:2000369	biological_process	regulation of clathrin-mediated endocytosis	8	SCYL2 // DAB2 // DAB2 // DAB2 // DAB2	0.00521228
GO:0071361	biological_process	cellular response to ethanol	7	SOD2 // SOD2 // SOD2 // CCL7 // ADCY7	0.00521228
GO:0006469	biological_process	negative regulation of protein kinase activity	10	APOE // GMFG // PTPRC // PYCARD // PTPN6 // PTPN6 // PTPN6 // PTPRJ // LYN // LYN // MLLT1 // FABP4 // DNAJC3 // IL1B // IL1B // IL1B // IL1B // IRAK3 // CDKN2A // CDKN2A // TNFAIP3 // TNFAIP3 // TNFAIP3 // TNFAIP3 // DUSP4 // DUSP6	0.0052882
GO:0045069	biological_process	regulation of viral genome replication	5	CCL5 // OAS1 // IL8 // APOBEC3G // OAS3 // MX1 // CD28 // ISG15 // PLSCR1 // APOBEC3C // IFI16 // IFITM1	0.0053479
GO:0046822	biological_process	regulation of nucleocytoplasmic transport	6	CD36 // CD36 // CD36 // CD36 // CD36 // CD36 // CD36 // CD36 // HCLS1 // TLR2 // TLR7 // DAB2 // CCL19 // GREM1 // TLR4 // IL1B // IGF1 // CDKN2A // TGFBR1 // MX2 // IL10 // TGFB1 // ECT2 // ECT2 // ECT2 // DDX58 // CDK1	0.00554817
GO:0060713	biological_process	labyrinthine layer morphogenesis	10	VCAM1 // GRB2 // GRB2 // ITGA4 // ITGA4 // ADM // ADM // IL10	0.00596601
GO:0050832	biological_process	defense response to fungus	5	S100A8 // S100A9 // HAMP // COTL1 // COTL1 // TGFB1 // S100A12	0.00603907
GO:0032270	biological_process	positive regulation of cellular protein metabolic process	7	CHI3L1 // CD36 // CD36 // CD36 // CD36 // CD36 // CD36 // CD36 // CD36 // CCL5 // APOE // CXCR4 // PTPRC // PTPRC // CCL2 // HCLS1 // SYK // LYN // LYN // IL8 // HTR2B // C5AR1 // DAB2 // DAB2 // DAB2 // DAB2 // CCL19 // GREM1 // OSM // MAP3K1 // PAK1 // PTPLAD1 // CSF1R // CSF1R // FCER1A // DNAJC3 // NR1H3 // TLR4 // IL1RN // ARRB2 // ARRB2 // TNFRSF1B // STK4 // CCR7 // FPR1 // PSMB8 // KRT17 …	0.00619592
GO:0007157	biological_process	heterophilic cell-cell adhesion	5	VCAM1 // SELE // ITGA4 // ITGA4 // ITGAL // ICAM1 // CADM1 // CADM1 // CADM1	0.00639503
GO:0032845	biological_process	negative regulation of homeostatic process	4	TNFRSF11B // CSK // CSK // CSK // CSK // P2RX7 // P2RX7 // TNFAIP3 // TGFB1	0.00639503
GO:0000041	biological_process	transition metal ion transport	8	CP // CP // CP // CP // CP // SLC31A2 // ATP6V1F // SLC39A9 // SLC31A1 // IREB2 // SCO2 // TCN2 // SLC11A1 // ATP6V1A // ATP6V1B2 // TFRC // ATOX1 // ATOX1 // SLC39A8	0.00646624
GO:2000501	biological_process	regulation of natural killer cell chemotaxis	10	CCL5 // CCL2 // CCL7 // CCL4	0.00657366
GO:2001199	biological_process	negative regulation of dendritic cell differentiation	6	TMEM176B // TMEM176A // TMEM176A // TMEM176A	0.00657366
GO:0034113	biological_process	heterotypic cell-cell adhesion	5	PTPRC // PTPRC // LILRB2 // CD1D	0.00657366
GO:0043615	biological_process	astrocyte cell migration	9	CCL2 // HEXB // HEXB // HEXB	0.00657366
GO:0002282	biological_process	microglial cell activation involved in immune response	8	TLR7 // CX3CR1 // CX3CR1 // CX3CR1	0.00657366
GO:0070493	biological_process	thrombin receptor signaling pathway	7	PLEK // HPGD // HPGD // HPGD	0.00657366
GO:2001046	biological_process	positive regulation of integrin-mediated signaling pathway	7	DAB2 // DAB2 // DAB2 // DAB2	0.00657366
GO:2001300	biological_process	lipoxin metabolic process	10	ALOX5AP // ALOX5 // HPGD // LTC4S	0.00657366
GO:0032796	biological_process	uropod organization	4	CORO1A // CORO1A // CORO1A // CORO1A	0.00657366
GO:0070163	biological_process	regulation of adiponectin secretion	7	IL1B // IL1B // IL1B // IL1B	0.00657366
GO:0072276	biological_process	metanephric glomerulus vasculature morphogenesis	12	PDGFRA // PDGFRA // PDGFRA // PDGFRA	0.00657366
GO:0072277	biological_process	metanephric glomerular capillary formation	13	PDGFRA // PDGFRA // PDGFRA // PDGFRA	0.00657366
GO:2000347	biological_process	positive regulation of hepatocyte proliferation	7	TNFAIP3 // TNFAIP3 // TNFAIP3 // TNFAIP3	0.00657366
GO:0034134	biological_process	toll-like receptor 2 signaling pathway	12	CD36 // CD14 // LY96 // TLR2 // MAP3K1 // TLR4 // RPS6KA1 // MYD88 // MAPKAPK3 // CDK1 // DUSP4 // DUSP6 // BTK	0.00660103
GO:0045780	biological_process	positive regulation of bone resorption	7	SPP1 // SYK // CA2 // TFRC // TFRC // TFRC	0.00669006
GO:0046852	biological_process	positive regulation of bone remodeling	6	SPP1 // SYK // CA2 // TFRC // TFRC // TFRC	0.00669006
GO:0051897	biological_process	positive regulation of protein kinase B signaling cascade	8	CHI3L1 // PTPRJ // HCLS1 // CCL19 // AKR1C3 // ARRB2 // ARRB2 // CCR7 // THBS1 // IGF1 // TGFBR1 // HPSE // AKR1C2 // TGFB1	0.00669006
GO:0002676	biological_process	regulation of chronic inflammatory response	7	CCL5 // TNFAIP3 // TNFAIP3 // TNFAIP3 // TNFAIP3 // IL10	0.00669006
GO:0033157	biological_process	regulation of intracellular protein transport	7	CD36 // CD36 // CD36 // CD36 // CD36 // CD36 // CD36 // CD36 // LCP1 // HCLS1 // TLR2 // TLR7 // DAB2 // CCL19 // GREM1 // TLR4 // IL1B // CSK // IGF1 // CDKN2A // TGFBR1 // IL10 // TGFB1 // ECT2 // ECT2 // ECT2 // DDX58 // CDK1	0.00694805
GO:0010038	biological_process	response to metal ion	4	S100A8 // S100A9 // HMOX1 // HMOX1 // FBP1 // HTR2B // CA2 // ALOX5AP // FABP4 // AKR1C3 // SOD2 // SOD2 // SOD2 // AQP9 // CEBPA // IREB2 // IREB2 // TXNIP // TNFRSF11B // THBS1 // CYBRD1 // PPIF // PPARG // PPARG // PPARG // PPARG // P2RX7 // P2RX7 // ICAM1 // LCK // LCK // ECT2 // XRCC4 // DTYMK // CDK1	0.00704765
GO:0071230	biological_process	cellular response to amino acid stimulus	7	CYBA // COL1A1 // PDGFRA // PDGFRA // PDGFRA // PDGFRA // MMP2 // MMP2 // MMP2 // DNMT1 // DNMT1 // DNMT1	0.00714643
GO:0010043	biological_process	response to zinc ion	5	S100A8 // S100A9 // CA2 // SOD2 // SOD2 // SOD2 // P2RX7 // P2RX7 // LCK // LCK	0.00720357
GO:0009968	biological_process	negative regulation of signal transduction	6	HMOX1 // CCL5 // APOE // STMN3 // STMN3 // PTPRC // PTPRC // RGS1 // PYCARD // TIMP2 // TIMP2 // PTPN6 // PTPN6 // PTPN6 // PTPRJ // FBP1 // SCYL2 // LYN // LYN // IL8 // HTR2B // PLEK // DAB2 // GREM1 // CHST11 // CHST11 // NR1H3 // TLR4 // IL1RN // ARRB2 // ARRB2 // STK4 // GRB2 // RGS10 // IL1B // IL1B // IL1B // IL1B // DDIT4 // CSK // CSK // CSK // CSK // ADM // HHEX // HHEX // PTPRE // PTPR…	0.0072963
GO:0070723	biological_process	response to cholesterol	6	APOE // APOE // APOE // CCR5 // TGFBR1 // TGFBR1 // TGFBR1 // TGFB1	0.00749522
GO:0009310	biological_process	amine catabolic process	5	KYNU // KYNU // KYNU // KMO // SAT1 // TDO2 // TDO2 // TDO2	0.00749522
GO:0002532	biological_process	production of molecular mediator involved in inflammatory response	5	SYK // FCER1G // LYN // LYN // ALOX5AP // ALOX5 // TLR4 // SLC7A2	0.00749522
GO:0042130	biological_process	negative regulation of T cell proliferation	9	LILRB2 // HLA-DRB1 // HLA-DRB1 // HLA-DRB1 // HLA-DRB1 // HLA-DRB1 // VSIG4 // PTPN6 // PTPN6 // PTPN6 // CDKN2A // IL10 // TGFB1	0.00750742
GO:0042307	biological_process	positive regulation of protein import into nucleus	9	HCLS1 // TLR2 // TLR7 // DAB2 // CCL19 // GREM1 // TLR4 // IL1B // TGFBR1 // TGFB1 // ECT2 // ECT2 // ECT2 // DDX58	0.00753078
GO:0045453	biological_process	bone resorption	6	ACP5 // ACP5 // ACP5 // RAC2 // RAC2 // RAC2 // CTSK // ADRB2 // TPP1	0.00773148
GO:0032722	biological_process	positive regulation of chemokine production	6	PYCARD // TLR2 // TLR7 // IL18 // CSF1R // TLR4 // IL1B // MIF // HIF1A	0.00773148
GO:0006568	biological_process	tryptophan metabolic process	9	KYNU // KYNU // KYNU // KMO // TDO2 // TDO2 // TDO2	0.00796785
GO:0080135	biological_process	regulation of cellular response to stress	5	SPP1 // CD36 // CD36 // CD36 // CD36 // CD36 // CD36 // CD36 // CD36 // PYCARD // SYK // LYN // DAB2 // DAB2 // DAB2 // DAB2 // CCL19 // GREM1 // PAK1 // PTPLAD1 // FCER1A // TLR4 // IL1RN // CCR7 // NPC1 // MAP3K2 // SCARF1 // IL1B // IL1B // IL1B // IL1B // POLH // RAP2A // MYD88 // MYD88 // SDCBP // HMGA1 // CDKN2A // CDKN2A // MIF // FZD8	0.00808779
GO:0030888	biological_process	regulation of B cell proliferation	8	MNDA // PTPRC // PTPRC // LYN // LYN // TLR4 // SASH3 // GPR183 // NCKAP1L // CDKN2A // MIF // IL10	0.00822734
GO:0002821	biological_process	positive regulation of adaptive immune response	6	PTPRC // PTPRC // PYCARD // FCER1G // FCER1A // SASH3 // IL1B // SLC11A1 // IL12RB1 // P2RX7 // P2RX7 // CCR2	0.00822734
GO:0010872	biological_process	regulation of cholesterol esterification	7	APOC1 // APOE // APOE // APOE // ABCG1	0.00852708
GO:0033700	biological_process	phospholipid efflux	7	APOC1 // APOE // ABCA1 // ABCG1 // APOC2	0.00852708
GO:0000902	biological_process	cell morphogenesis	5	TYROBP // APOE // APOE // APOE // CXCR4 // PTPRC // SNX10 // LIPA // LIPA // LIPA // EPB41L3 // DAB2 // DAB2 // DAB2 // DAB2 // RAC2 // GREM1 // PAK1 // PAK1 // PAK1 // PAK1 // PAK1 // PAK1 // PAK1 // TREM2 // IL7R // IL7R // IL7R // LST1 // LST1 // LST1 // LST1 // LST1 // LST1 // STK4 // PDPN // PDPN // LAMB1 // GRB2 // PSMB10 // NRP2 // NRP2 // NRP2 // NRP2 // PLXNC1 // ABL2 // ADM // ADM // SL…	0.00852708
GO:0033008	biological_process	positive regulation of mast cell activation involved in immune response	8	SYK // FCER1G // FCER1A // FGR // FGR	0.00852708
GO:0043306	biological_process	positive regulation of mast cell degranulation	9	SYK // FCER1G // FCER1A // FGR // FGR	0.00852708
GO:0001774	biological_process	microglial cell activation	7	AIF1 // TLR7 // CX3CR1 // CX3CR1 // CX3CR1	0.00852708
GO:0002606	biological_process	positive regulation of dendritic cell antigen processing and presentation	6	CCL19 // CCR7 // CCR7 // CCR7 // SLC11A1	0.00852708
GO:0001957	biological_process	intramembranous ossification	5	CTSK // COL1A1 // MMP2 // MMP2 // MMP2	0.00852708
GO:0036072	biological_process	direct ossification	4	CTSK // COL1A1 // MMP2 // MMP2 // MMP2	0.00852708
GO:0060670	biological_process	branching involved in labyrinthine layer morphogenesis	11	GRB2 // GRB2 // ADM // ADM // IL10	0.00852708
GO:0070474	biological_process	positive regulation of uterine smooth muscle contraction	9	OXTR // OXTR // OXTR // LCK // LCK	0.00852708
GO:0009133	biological_process	nucleoside diphosphate biosynthetic process	8	DTYMK // DTYMK // DTYMK // DTYMK // DTYMK	0.00852708
GO:0031400	biological_process	negative regulation of protein modification process	8	APOE // GMFG // SAMSN1 // SAMSN1 // PTPRC // PTPRC // PYCARD // PTPN6 // PTPN6 // PTPN6 // PTPRJ // LYN // LYN // MLLT1 // GREM1 // FABP4 // DNAJC3 // ARRB2 // ARRB2 // SPI1 // PSMB8 // PSMB10 // IL1B // IL1B // IL1B // IL1B // DDIT4 // PSMB9 // ISG15 // IRAK3 // CDKN2A // CDKN2A // TNFAIP3 // TNFAIP3 // TNFAIP3 // TNFAIP3 // TGFB1 // DUSP4 // IGFBP3 // DUSP6 // DUSP6 // DNMT1	0.00869197
GO:0009408	biological_process	response to heat	4	CD14 // CD14 // CD14 // CD14 // CCL2 // TFEC // LYN // LYN // OSM // OSM // CXCL10 // THBS1 // ST8SIA1 // ST8SIA1 // MICB	0.00889422
GO:0031343	biological_process	positive regulation of cell killing	4	PTPRC // PTPRC // CRTAM // IL12RB1 // P2RX7 // P2RX7 // CADM1 // CADM1 // CADM1	0.00918014
GO:0060325	biological_process	face morphogenesis	6	COL1A1 // PDGFRA // PDGFRA // PDGFRA // PDGFRA // MMP2 // MMP2 // MMP2 // TGFB1	0.00918014
GO:0036314	biological_process	response to sterol	5	APOE // APOE // APOE // CCR5 // TGFBR1 // TGFBR1 // TGFBR1 // TGFB1	0.00919101
GO:0010984	biological_process	regulation of lipoprotein particle clearance	4	APOC1 // APOC2 // CSK // CSK // CSK // CSK	0.00931242
GO:0097028	biological_process	dendritic cell differentiation	9	LYN // LYN // CCL19 // CCR7 // CCR7 // CCR7	0.00931242
GO:0046456	biological_process	icosanoid biosynthetic process	8	SYK // ALOX5AP // FCER1A // TBXAS1 // ALOX5 // AKR1C3 // PTGS1 // HPGDS // HPGD // MIF // LTC4S	0.00980465
GO:1901570	biological_process	fatty acid derivative biosynthetic process	4	SYK // ALOX5AP // FCER1A // TBXAS1 // ALOX5 // AKR1C3 // PTGS1 // HPGDS // HPGD // MIF // LTC4S	0.00980465
GO:0008154	biological_process	actin polymerization or depolymerization	7	AIF1 // GAS7 // GAS7 // GAS7 // GAS7 // GAS7 // GAS7 // GAS7 // EVL // WAS // WAS	0.00980465
GO:0070373	biological_process	negative regulation of ERK1 and ERK2 cascade	9	LYN // LYN // TLR4 // CSK // CSK // CSK // CSK // IGF1 // DUSP6 // DUSP6	0.00989905

## Sheet: common_genes
Table S5. Genes upregulated in both plaque types.
gene name	known link to atherosclerosis	IFNG-LPS STAT1 targets	IFNG STAT1 tgts	LPS STAT1 tgts
AKR1C3
ALCAM	+
APOC1	+
APOE	+
ARHGDIB
ARL4C
ATP1B1
C7orf10
C8orf4
CA12	+
CCL18	+
CCL19	+
CCL2	+	+	+	+
CCL4	+
CCL5	+	+	+	+
CD28	+
CD55	+
CD69	+	+
CECR1
CP	+
CTSD	+
CTSZ
CXCL10	+	+	+	+
CXCL2	+
CXCL9	+	+	+	+
CXCR4	+
DUSP6
F2R	+
FRMD4B
FXYD5	+
GZMA	+
GZMK	+
HAPLN1
HPSE	+
HS3ST1
HTR2B
IBSP		+		+
IGJ
IGKC
IGSF6
IL13RA2
IL7R	+
KRT17	+
KRT7
LAMB1
MAB21L2
MMP9	+
OXTR
PHLDA2
PTGS1	+
PTX3	+		+
RGS1	+
SCG2
SELE	+			+
SERPINE1	+
SGK1	+
SLAMF8		+	+
SLC14A1
SLC16A3
SLC2A3	+
SPINK1	+
SPINT2
SPP1	+
ST8SIA1
THBS1	+
THBS2	+
TLR4	+
TNFRSF11B	+
TNS3
VCAM1	+
VCAN	+
VEGFC	+		+

## Sheet: GO_common
Table S6. Enriched gene ontology terms derived from the list of genes upregulated in both plaque types.
GOID	Ontology	Term	Level	symbols	p
GO:0032101	biological_process	regulation of response to external stimulus	4	SCG2 // SPP1 // CD55 // THBS1 // SERPINE1 // F2R // CXCR4 // SELE // CCL5 // CCL2 // APOE // APOE // APOE // CD28 // HPSE // CXCL10 // CCL19 // CCL4 // TLR4 // VEGFC	1.08391e-09
GO:0006875	biological_process	cellular metal ion homeostasis	8	CP // CP // CP // CP // CP // CD55 // F2R // CXCR4 // CCL5 // CCL2 // APOE // APOE // APOE // OXTR // OXTR // OXTR // HTR2B // CCL19	1.55649e-09
GO:0055065	biological_process	metal ion homeostasis	7	CP // CP // CP // CP // CP // CD55 // F2R // CXCR4 // CCL5 // CCL2 // APOE // APOE // APOE // OXTR // OXTR // OXTR // HTR2B // CCL19	3.35966e-09
GO:0030003	biological_process	cellular cation homeostasis	7	CP // CP // CP // CP // CP // CD55 // F2R // CXCR4 // CCL5 // CCL2 // APOE // APOE // APOE // OXTR // OXTR // OXTR // HTR2B // CCL19	6.92847e-09
GO:0006954	biological_process	inflammatory response	4	SCG2 // SPP1 // THBS1 // THBS1 // CCL18 // F2R // CXCR4 // VCAM1 // SELE // CCL5 // CCL2 // CXCL9 // CXCL2 // PTX3 // CXCL10 // CCL19 // CCL4 // TLR4	6.92847e-09
GO:0007155	biological_process	cell adhesion	3	HAPLN1 // HAPLN1 // HAPLN1 // HAPLN1 // SPP1 // SPP1 // THBS1 // VCAN // VCAN // VCAN // VCAN // ATP1B1 // VCAM1 // VCAM1 // SELE // SELE // SELE // SELE // SELE // CCL5 // CCL2 // ALCAM // LAMB1 // HPSE // CCL4 // THBS2 // IBSP	1.30342e-08
GO:0022610	biological_process	biological adhesion	1	HAPLN1 // HAPLN1 // HAPLN1 // HAPLN1 // SPP1 // SPP1 // THBS1 // VCAN // VCAN // VCAN // VCAN // ATP1B1 // VCAM1 // VCAM1 // SELE // SELE // SELE // SELE // SELE // CCL5 // CCL2 // ALCAM // LAMB1 // HPSE // CCL4 // THBS2 // IBSP	1.30342e-08
GO:0002687	biological_process	positive regulation of leukocyte migration	8	THBS1 // SERPINE1 // SELE // CCL5 // CCL2 // CXCL10 // CCL19 // CCL4 // VEGFC	4.48531e-08
GO:0009611	biological_process	response to wounding	3	SCG2 // SPP1 // SLC16A3 // THBS1 // THBS1 // CCL18 // SERPINE1 // F2R // ATP1B1 // CXCR4 // VCAM1 // SELE // CCL5 // CCL2 // CXCL9 // APOE // APOE // APOE // CXCL2 // HPSE // PTX3 // CXCL10 // CCL19 // CCL4 // TLR4 // VEGFC	7.56314e-08
GO:0055080	biological_process	cation homeostasis	6	CP // CP // CP // CP // CP // CD55 // F2R // CXCR4 // CCL5 // CCL2 // APOE // APOE // APOE // OXTR // OXTR // OXTR // HTR2B // CCL19	7.964e-08
GO:0002690	biological_process	positive regulation of leukocyte chemotaxis	9	THBS1 // SERPINE1 // CCL5 // CCL2 // CXCL10 // CCL19 // CCL4 // VEGFC	1.86431e-07
GO:0050920	biological_process	regulation of chemotaxis	5	SCG2 // THBS1 // SERPINE1 // CXCR4 // CCL5 // CCL2 // CXCL10 // CCL19 // CCL4 // VEGFC	2.23125e-07
GO:0060137	biological_process	maternal process involved in parturition	5	CD55 // CCL2 // OXTR // OXTR // OXTR	2.84904e-07
GO:0050921	biological_process	positive regulation of chemotaxis	6	SCG2 // THBS1 // SERPINE1 // CCL5 // CCL2 // CXCL10 // CCL19 // CCL4 // VEGFC	3.01709e-07
GO:0050795	biological_process	regulation of behavior	4	SCG2 // THBS1 // SERPINE1 // CXCR4 // CCL5 // CCL2 // HTR2B // CXCL10 // CCL19 // CCL4 // VEGFC	3.40344e-07
GO:0002685	biological_process	regulation of leukocyte migration	7	THBS1 // SERPINE1 // SELE // CCL5 // CCL2 // CXCL10 // CCL19 // CCL4 // VEGFC	4.06134e-07
GO:0040011	biological_process	locomotion	1	SCG2 // SPP1 // SLC16A3 // THBS1 // CCL18 // VCAN // ATP1B1 // CXCR4 // VCAM1 // SELE // CCL5 // CCL2 // CXCL9 // CXCL2 // ALCAM // ALCAM // LAMB1 // LAMB1 // HTR2B // CXCL10 // CCL19 // CCL4 // VEGFC // TNS3 // TNS3 // TNS3	5.28948e-07
GO:0002376	biological_process	immune system process	1	SCG2 // SPP1 // CTSD // RGS1 // CD55 // SLC16A3 // THBS1 // CCL18 // ATP1B1 // CXCR4 // VCAM1 // SELE // CCL5 // CCL5 // CCL2 // CCL2 // CXCL9 // IGKC // IGJ // CXCL2 // DUSP6 // GZMA // CD28 // CD28 // MMP9 // ARHGDIB // PTX3 // CXCL10 // IL7R // IL7R // IL7R // CCL19 // CCL19 // CCL4 // TLR4 // IGSF6	5.28948e-07
GO:0002688	biological_process	regulation of leukocyte chemotaxis	8	THBS1 // SERPINE1 // CCL5 // CCL2 // CXCL10 // CCL19 // CCL4 // VEGFC	5.28948e-07
GO:0008284	biological_process	positive regulation of cell proliferation	5	SCG2 // MAB21L2 // F2R // VCAM1 // CCL5 // CCL2 // ST8SIA1 // ST8SIA1 // CD28 // CD28 // LAMB1 // HPSE // HTR2B // AKR1C3 // CXCL10 // CCL19 // TLR4 // VEGFC // TNS3 // TNS3 // TNS3	7.90229e-07
GO:0032103	biological_process	positive regulation of response to external stimulus	5	SCG2 // THBS1 // SERPINE1 // CCL5 // CCL2 // CD28 // CXCL10 // CCL19 // CCL4 // TLR4 // VEGFC	8.34816e-07
GO:0048520	biological_process	positive regulation of behavior	5	SCG2 // THBS1 // SERPINE1 // CCL5 // CCL2 // CXCL10 // CCL19 // CCL4 // VEGFC	8.34816e-07
GO:0006874	biological_process	cellular calcium ion homeostasis	9	CD55 // F2R // CXCR4 // CCL5 // CCL2 // APOE // APOE // APOE // OXTR // OXTR // OXTR // HTR2B // CCL19	9.16784e-07
GO:0072503	biological_process	cellular divalent inorganic cation homeostasis	8	CD55 // F2R // CXCR4 // CCL5 // CCL2 // APOE // APOE // APOE // OXTR // OXTR // OXTR // HTR2B // CCL19	1.43974e-06
GO:0055074	biological_process	calcium ion homeostasis	8	CD55 // F2R // CXCR4 // CCL5 // CCL2 // APOE // APOE // APOE // OXTR // OXTR // OXTR // HTR2B // CCL19	1.45663e-06
GO:0072507	biological_process	divalent inorganic cation homeostasis	7	CD55 // F2R // CXCR4 // CCL5 // CCL2 // APOE // APOE // APOE // OXTR // OXTR // OXTR // HTR2B // CCL19	2.34436e-06
GO:0044699	biological_process	single-organism process	1	HAPLN1 // HAPLN1 // HAPLN1 // HAPLN1 // SCG2 // SCG2 // SCG2 // SLC14A1 // MAB21L2 // SPP1 // SPP1 // IL13RA2 // CP // CP // CP // CP // CP // TNFRSF11B // CTSD // CTSD // CTSD // RGS1 // CD55 // SLC16A3 // SLC16A3 // SLC16A3 // SLC16A3 // SLC16A3 // SLC16A3 // SLC16A3 // SLC16A3 // SLC16A3 // SPINT2 // THBS1 // THBS1 // CCL18 // SERPINE1 // VCAN // VCAN // VCAN // VCAN // CA12 // F2R // ARL4C //…	2.77483e-06
GO:0040017	biological_process	positive regulation of locomotion	4	SCG2 // THBS1 // SERPINE1 // F2R // SELE // CCL5 // CCL2 // LAMB1 // MMP9 // CXCL10 // CCL19 // CCL4 // VEGFC	2.77679e-06
GO:0008015	biological_process	blood circulation	5	F2R // APOE // APOE // APOE // OXTR // OXTR // OXTR // SGK1 // HTR2B // CXCL10 // VEGFC // PTGS1 // CTSZ	3.10292e-06
GO:0003013	biological_process	circulatory system process	4	F2R // APOE // APOE // APOE // OXTR // OXTR // OXTR // SGK1 // HTR2B // CXCL10 // VEGFC // PTGS1 // CTSZ	3.35255e-06
GO:0060453	biological_process	regulation of gastric acid secretion	6	OXTR // OXTR // OXTR // SGK1	4.68012e-06
GO:2000026	biological_process	regulation of multicellular organismal development	4	SPP1 // TNFRSF11B // THBS1 // THBS1 // SERPINE1 // CXCR4 // KRT17 // KRT17 // CCL2 // APOE // APOE // APOE // OXTR // OXTR // OXTR // DUSP6 // DUSP6 // CD28 // HPSE // CXCL10 // IL7R // IL7R // IL7R // CCL19 // THBS2 // THBS2 // TLR4 // VEGFC	4.68012e-06
GO:0044763	biological_process	single-organism cellular process	2	HAPLN1 // HAPLN1 // HAPLN1 // HAPLN1 // SCG2 // SLC14A1 // SPP1 // SPP1 // IL13RA2 // CP // CP // CP // CP // CP // TNFRSF11B // CTSD // CTSD // CTSD // RGS1 // CD55 // SLC16A3 // SLC16A3 // SLC16A3 // SLC16A3 // SLC16A3 // SLC16A3 // SLC16A3 // SLC16A3 // SLC16A3 // SPINT2 // THBS1 // CCL18 // SERPINE1 // VCAN // VCAN // VCAN // VCAN // F2R // ARL4C // ATP1B1 // CXCR4 // KRT17 // KRT17 // VCAM1 …	5.20764e-06
GO:0002684	biological_process	positive regulation of immune system process	4	CD55 // THBS1 // SERPINE1 // VCAM1 // SELE // CCL5 // CCL2 // IGKC // DUSP6 // CD28 // CD28 // CXCL10 // IL7R // IL7R // IL7R // CCL19 // CCL4 // TLR4 // VEGFC	6.73246e-06
GO:0042157	biological_process	lipoprotein metabolic process	5	APOE // APOE // APOE // APOE // APOC1 // APOC1 // APOC1 // APOC1 // APOC1 // APOC1	7.69778e-06
GO:0090162	biological_process	establishment of epithelial cell polarity	5	FRMD4B // FRMD4B // FRMD4B // FRMD4B // FRMD4B	7.72297e-06
GO:0016477	biological_process	cell migration	5	SCG2 // SPP1 // SLC16A3 // THBS1 // VCAN // ATP1B1 // CXCR4 // VCAM1 // SELE // CCL5 // CCL2 // LAMB1 // LAMB1 // HTR2B // CCL19 // VEGFC // TNS3 // TNS3 // TNS3	8.83975e-06
GO:0007567	biological_process	parturition	4	CD55 // CCL2 // OXTR // OXTR // OXTR	9.75892e-06
GO:0040012	biological_process	regulation of locomotion	3	SCG2 // THBS1 // SERPINE1 // F2R // CXCR4 // SELE // CCL5 // CCL2 // APOE // LAMB1 // MMP9 // SGK1 // CXCL10 // CCL19 // CCL4 // VEGFC	1.12796e-05
GO:0030335	biological_process	positive regulation of cell migration	7	THBS1 // SERPINE1 // F2R // SELE // CCL5 // CCL2 // LAMB1 // MMP9 // CXCL10 // CCL19 // CCL4 // VEGFC	1.14175e-05
GO:2000147	biological_process	positive regulation of cell motility	6	THBS1 // SERPINE1 // F2R // SELE // CCL5 // CCL2 // LAMB1 // MMP9 // CXCL10 // CCL19 // CCL4 // VEGFC	1.36e-05
GO:0030334	biological_process	regulation of cell migration	6	THBS1 // SERPINE1 // F2R // CXCR4 // SELE // CCL5 // CCL2 // APOE // LAMB1 // MMP9 // SGK1 // CXCL10 // CCL19 // CCL4 // VEGFC	1.36285e-05
GO:0055082	biological_process	cellular chemical homeostasis	5	CP // CP // CP // CP // CP // CD55 // F2R // CXCR4 // VCAM1 // CCL5 // CCL2 // APOE // APOE // APOE // OXTR // OXTR // OXTR // HTR2B // CCL19	1.36463e-05
GO:0010873	biological_process	positive regulation of cholesterol esterification	8	APOE // APOE // APOE // APOC1	1.36463e-05
GO:0006955	biological_process	immune response	2	RGS1 // CD55 // THBS1 // CCL18 // VCAM1 // CCL5 // CCL5 // CCL2 // CCL2 // CXCL9 // IGKC // IGJ // CXCL2 // DUSP6 // GZMA // CD28 // CD28 // ARHGDIB // CXCL10 // IL7R // CCL19 // CCL19 // CCL4 // TLR4 // IGSF6	1.57356e-05
GO:0051272	biological_process	positive regulation of cellular component movement	5	THBS1 // SERPINE1 // F2R // SELE // CCL5 // CCL2 // LAMB1 // MMP9 // CXCL10 // CCL19 // CCL4 // VEGFC	1.7166e-05
GO:0042127	biological_process	regulation of cell proliferation	4	SCG2 // MAB21L2 // THBS1 // SERPINE1 // F2R // VCAM1 // CCL5 // CCL2 // APOE // ST8SIA1 // ST8SIA1 // CD28 // CD28 // LAMB1 // HPSE // SGK1 // HTR2B // AKR1C3 // CXCL10 // CCL19 // TLR4 // VEGFC // TNS3 // TNS3 // TNS3 // PTGS1	1.88242e-05
GO:0006873	biological_process	cellular ion homeostasis	6	CP // CP // CP // CP // CP // CD55 // F2R // CXCR4 // CCL5 // CCL2 // APOE // APOE // APOE // OXTR // OXTR // OXTR // HTR2B // CCL19	2.1601e-05
GO:2000145	biological_process	regulation of cell motility	5	THBS1 // SERPINE1 // F2R // CXCR4 // SELE // CCL5 // CCL2 // APOE // LAMB1 // MMP9 // SGK1 // CXCL10 // CCL19 // CCL4 // VEGFC	2.1601e-05
GO:0006950	biological_process	response to stress	2	SCG2 // SPP1 // CTSD // CTSD // CTSD // CD55 // SLC16A3 // THBS1 // THBS1 // CCL18 // SERPINE1 // F2R // ATP1B1 // ATP1B1 // CXCR4 // VCAM1 // SELE // CCL5 // CCL2 // CXCL9 // IGKC // APOE // APOE // APOE // ST8SIA1 // ST8SIA1 // CXCL2 // OXTR // OXTR // OXTR // DUSP6 // CD28 // HPSE // SGK1 // SGK1 // SGK1 // AKR1C3 // PTX3 // CXCL10 // CCL19 // CCL4 // TLR4 // VEGFC // PTGS1	2.2904e-05
[truncated: 169 more rows]
